# Supplementary material for: A novel oral nutraceutical formula of omega-3 and omega-6 fatty acids with vitamins (PLP10) in relapsing remitting multiple sclerosis: a randomised, double-blind, placebo-controlled proof-of-concept clinical trial
Source: PubMed Central journal article supplement — BMJ Open. 2013 Apr 17;3(4):e002170. doi: 10.1136/bmjopen-2012-002170 (PMC3641495; doi:10.1136/bmjopen-2012-002170), 2013-04-17
Supplement: bmjopen-2012-002170.draft_revisions.pdf [file bmjopen-2012-002170.draft_revisions.pdf]

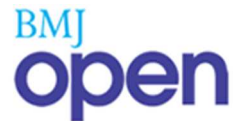

**A novel oral nutraceutical formula (PLP10) for the treatment of relapsing remitting multiple sclerosis: a randomized, double-blind, placebo-controlled proof-of-concept clinical trial**

|                                 |                                                                                                                                                                                                                                                                                                                                                                                                                                                                                                                                                   |
|---------------------------------|---------------------------------------------------------------------------------------------------------------------------------------------------------------------------------------------------------------------------------------------------------------------------------------------------------------------------------------------------------------------------------------------------------------------------------------------------------------------------------------------------------------------------------------------------|
| Journal:                        | <i>BMJ Open</i>                                                                                                                                                                                                                                                                                                                                                                                                                                                                                                                                   |
| Manuscript ID:                  | bmjopen-2012-002170                                                                                                                                                                                                                                                                                                                                                                                                                                                                                                                               |
| Article Type:                   | Research                                                                                                                                                                                                                                                                                                                                                                                                                                                                                                                                          |
| Date Submitted by the Author:   | 30-Sep-2012                                                                                                                                                                                                                                                                                                                                                                                                                                                                                                                                       |
| Complete List of Authors:       | Pantzaris, Marios; The Cyprus Institute of Neurology and Genetics (CING), Clinic C and PALUPA Medical Ltd<br>Loukaides, George; The Cyprus Institute of Neurology and Genetics (CING), Neurology Clinic and PALUPA Medical Ltd<br>Ntzani, Evangelia; University of Ioannina School of Medicine (UISM), Clinical and Molecular Epidemiology Unit, Department of Hygiene and Epidemiology<br>Patrikios, Ioannis; The Cyprus Institute of Neurology and Genetics (CING), Clinic C and PALUPA Medical Ltd; European University Cyprus, Health Science |
| <b>Primary Subject Heading</b>: | Nutrition and metabolism                                                                                                                                                                                                                                                                                                                                                                                                                                                                                                                          |
| Secondary Subject Heading:      | Neurology, Complementary medicine, Pharmacology and therapeutics                                                                                                                                                                                                                                                                                                                                                                                                                                                                                  |
| Keywords:                       | Nutrition < TROPICAL MEDICINE, NUTRITION & DIETETICS, Multiple sclerosis < NEUROLOGY                                                                                                                                                                                                                                                                                                                                                                                                                                                              |
|                                 |                                                                                                                                                                                                                                                                                                                                                                                                                                                                                                                                                   |

SCHOLARONE™  
Manuscripts

1 **A novel oral nutraceutical formula (PLP10) for the**  
2 **treatment of relapsing remitting multiple sclerosis: a**  
3 **randomized, double-blind, placebo-controlled proof-of-**  
4 **concept clinical trial**

5 **Marios C. Pantzaris, George N. Loukaides, Evangelia E. Ntzani, Ioannis S.**  
6 **Patrikios**

7 The Cyprus Institute of Neurology and Genetics (CING) 1683 Nicosia, Cyprus Marios C.  
8 Pantzaris Senior Consultant Neurologist Neurology Clinic C and PALUPA Medical Ltd., The  
9 Cyprus Institute of Neurology and Genetics (CING) 1683 Nicosia, Cyprus George N.  
10 Loukaides Clinical Dietitian/Nutritionist Neurology Clinic and PALUPA Medical Ltd.,  
11 University of Ioannina School of Medicine (UISM) 45110 Ioannina, Greece Evangelia E.  
12 Ntzani Assistant Professor Clinical and Molecular Epidemiology Unit, Department of  
13 Hygiene and Epidemiology, PALUPA Medical Ltd at The Cyprus Institute of Neurology and  
14 Genetics (CING) 1683 Nicosia, Cyprus Ioannis S. Patrikios Senior Research Scientist,  
15 visiting Professor at European University Cyprus Nicosia, Cyprus, Department of Health and  
16 Science. Correspondence should be addresses to e-mail: [I.Patrikios@euc.ac.cy](mailto:I.Patrikios@euc.ac.cy) or  
17 [pantzari@cing.ac.cy](mailto:pantzari@cing.ac.cy)

18  
19 **Correspondence to:**

20 **Ioannis Patrikios**

21 The Cyprus Institute of Neurology and Genetics (CING)  
22 Neurology Clinic C (PALUPA Medical),

1  
2  
3 23 6 International Airport Av.  
4  
5 24 P.O.Box 23462, 1683 Ayios Dometios. Nicosia, Cyprus  
6  
7 25 Tel: +357 22 358 600, +357 99 097 856;  
8  
9  
10 26 [i.patrikios@euc.ac.cy](mailto:i.patrikios@euc.ac.cy)  
11  
12 27 [patrikiosioannis@gmail.com](mailto:patrikiosioannis@gmail.com)  
13  
14  
15

16 **AND**  
17  
18  
19  
20

21 **Marios Pantzaris**  
22

23  
24 32 The Cyprus Institute of Neurology and Genetics (CING)  
25  
26 33 Neurology Clinic C (PALUPA Medical),  
27  
28 34 6 International Airport Av.  
29  
30 35 P.O.Box 23462, 1683 Ayios Dometios, Nicosia Cyprus  
31  
32 36 Tel: +357 22 358 600;  
33  
34 37 [pantzari@cing.ac.cy](mailto:pantzari@cing.ac.cy)  
35  
36  
37  
38

39 **Keywords:** antioxidant vitamins, polyunsaturated fatty acids, multiple sclerosis, systems  
40 medicine, randomized clinical trial.  
41  
42  
43  
44  
45

46 **Word Count: 6217**  
47  
48  
49  
50  
51  
52  
53  
54  
55  
56  
57  
58  
59  
60

1  
2  
3 **Abstract**  
4

5 **Objective** To assess whether our three novel interventions, formulated based on systems  
6  
7  
8  
9  
10  
11  
12  
13  
14  
15  
16  
17  
18  
19  
20  
21  
22  
23  
24  
25  
26  
27  
28  
29  
30  
31  
32  
33  
34  
35  
36  
37  
38  
39  
40  
41  
42  
43  
44  
45  
46  
47  
48  
49  
50  
51  
52  
53  
54  
55  
56  
57  
58  
59  
60  
61  
62  
63  
64  
65  
66  
67  
68  
69  
70  
71  
72  
73  
74  
75  
76  
77  
78  
79  
80  
81  
82  
83  
84  
85  
86  
87  
88  
89  
90  
91  
92  
93  
94  
95  
96  
97  
98  
99  
100

multiple sclerosis who were either treated with disease modifying treatment or untreated.

**Design** 30-month randomized double-blind, placebo-controlled, parallel design, phase II proof-of-concept clinical study.

**Settings** Cyprus Institute of Neurology and Genetics (CING)

**Participants and Interventions** 80 subjects were randomized into four groups of 20. The first intervention (A) was composed of omega-3 and omega-6 polyunsaturated fatty acids at 1:1 wt/wt. Specifically, the omega-3 fatty acids were docosahexaenoic acid (DHA) and eicosapentaenoic acid (EPA) at 3:1 wt/wt and the omega-6 fatty acids were linoleic acid (LA) and gamma ( $\gamma$ )-linolenic acid (GLA) at 2:1 wt/wt. This intervention also included minor quantities of other specific polyunsaturated, monounsaturated and specific saturated fatty acids as well as vitamin A and vitamin E (alpha-tocopherol). The third intervention (C) was  $\gamma$ -tocopherol alone. The second intervention (PLP10) was a combination of A and C. A fourth group of 20 received a vehicle placebo. The interventions were administered per os once daily.

**Main outcome measures** The primary endpoint was the annualized relapse rate (ARR) of the three interventions versus placebo at two years. The secondary end point was the time to confirmed disability progression at two years.

1  
2  
3 72 **Results** The per-protocol, proof-of-concept, analysis demonstrated a 64% adjusted relative  
4  
5 73 reduction in ARR at two years for PLP10 versus placebo (P=0.024). Regarding the secondary  
6  
7 74 endpoint, a relative reduction of 86% in the risk of sustained progression of disability was  
8  
9  
10 75 observed within the PLP10 group (p=0.047). No adverse events were reported. Interventions  
11  
12 76 A and C showed no significant efficacy.  
13  
14  
15  
16  
17  
18  
19  
20  
21  
22

23 78 **Conclusions** PLP10 treatment significantly reduced the ARR, and the risk of sustained  
24  
25 79 disability progression without any adverse or significant side effects.  
26  
27  
28  
29  
30  
31  
32  
33  
34  
35  
36  
37  
38  
39  
40  
41  
42  
43  
44  
45  
46  
47  
48  
49  
50  
51  
52  
53  
54  
55  
56  
57  
58  
59  
60

81 **Trial registration** International Standard Randomized Controlled Trial, number  
82 ISRCTN87818535.  
83  
84  
85  
86  
87  
88  
89  
90  
91

## 92 Introduction

93 Multiple sclerosis (MS) is a complex multifactorial disease that results from interplay  
94 between as yet unidentified environmental factors and susceptibility genes.<sup>1-3</sup> Together, these  
95 factors trigger a cascade of events, involving engagement of the immune system,  
96 inflammatory injury of myelin, axons and glia, functional recovery and structural repair,  
97 gliosis, and neurodegeneration.<sup>4</sup> The bio-mechanisms involved are: immune-mediated  
98 inflammation, oxidative stress and excitotoxicity.<sup>5-9</sup> These mechanisms may all contribute to  
99 oligodendrocyte and neuronal damage and even cell death, hence promoting disease  
100 progression. The increasing prevalence of MS, the limited efficacy and the side effects of the  
101 existing treatments urge the clinical need for the development of new, innovative, more  
102 effective, safe, and preventive treatment strategies.

103  
104 Research has shown that multiple variables dynamically interact and many different complex  
105 interrelated processes are simultaneously orchestrated for MS pathogenesis. The fundamental  
106 distinctiveness of SM is not just the recognition that different specific complex factors are  
107 important in disease management, but that they need to be incorporated in some meaningful  
108 way to treatment selection and delivery.<sup>10</sup> The primary challenge tackled by systems  
109 scientific approach is the elucidation of how these multiple variables dynamically interact and  
110 how one can apply this understanding to affect the system and achieve a desirable end.<sup>10</sup> The  
111 answer might be the simultaneous interference with all involved perturbed mechanisms, by  
112 using a cocktail of different specific ingredients, potentially able through synergistic effect to  
113 give a long, holistic and effective treatment (Supplementary Information Methods 1).

114  
115 The PUFA composition of membrane phospholipids plays a direct role in immune and non-  
116 immune related inflammation. PUFA and antioxidant deficiencies along with decreased

1  
2  
3 117 cellular antioxidant defense mechanisms have been reported for MS patients.<sup>11</sup> The cause of  
4  
5 118 these PUFA deficiencies is not entirely clear and may involve metabolic and nutritional  
6  
7 119 alterations.<sup>11</sup>  
8  
9

10 120

11 121 Increased or uncontrolled inflammation contributes to several different acute and chronic  
12 122 diseases and it is characterized by the production of inflammatory cytokines, arachidonic acid  
13 123 (AA)-derived eicosanoids (prostaglandins (PGs), thromboxanes (TXs), leukotrienes (LTs),  
14 124 and other oxidized derivatives), other inflammatory agents such as reactive oxygen species  
15 125 (ROS), nitric oxide (NO), and adhesion molecules (Fig 1).<sup>12</sup> During inflammation glutamate  
16 126 homeostasis is altered by activated immune cells releasing increased quantities of glutamate  
17 127 that can result in over activation of glutamate receptors and in return excitotoxic  
18 128 oligodendroglial death.<sup>7,13</sup> As such, among others, membrane-related pathology, immune-  
19 129 mediated inflammation, oxidative stress and excitotoxicity provide potentially useful  
20 130 combined targets for intervention in MS.  
21  
22  
23  
24  
25  
26  
27  
28  
29  
30  
31  
32  
33

34 131

35  
36 132 *In vitro and in vivo* studies have demonstrated that dietary EPA, DHA, LA, and GLA can be  
37 133 implicated and modulate almost all known complex network of events and pathways  
38 134 repertoire in MS pathophysiology. Brain membrane fatty acid composition can be modified  
39 135 with dietary supplementation, but the process has been showed to be age dependent (it takes  
40 136 much longer in adults vs. developing brains) as well as possibly dependent on the quantities  
41 137 of the dietary/supplemented PUFAs.<sup>14</sup> Both human and animal studies proved that diets high  
42 138 in DHA and EPA increase the proportion of these PUFA in the membranes of inflammatory  
43 139 cells and reduce the levels of AA.<sup>12,15</sup> The anti-inflammatory properties of omega-3 include  
44 140 production of PGs and TXs of the 3-series and LTs of the 5-series (Fig 1).<sup>14,16</sup> Resolvins and  
45 141 protectins are biosynthesized from omega-3 fatty acids via cyclooxygenase-2/lipoxygenase  
46  
47  
48  
49  
50  
51  
52  
53  
54  
55  
56  
57  
58  
59  
60

1  
2  
3 142 (COX-2/LOX) pathways and they promote control of inflammation in neural tissues (Fig  
4  
5 143 1).<sup>17-21</sup> T-cell proliferation in acute and chronic inflammation can be reduced by  
6  
7 144 supplementation with either omega-6 or omega-3 PUFA.<sup>22</sup> Furthermore, vitamin E is an  
8  
9 145 important antioxidant that can interrupt the propagation of free radical chain reactions.<sup>23</sup>  
10  
11 146 Vitamin E (alpha-tocopherol, an isoform of vitamin E) efficiently detoxifies hydroxyl,  
12  
13 147 perhydroxyl and superoxide free radicals.<sup>24</sup> However  $\gamma$ -tocopherol (another isoform of  
14  
15 148 vitamin E) seems to be more efficiently implicated in trapping NO radicals.<sup>25</sup> In addition  
16  
17 149 alpha-tocopherol exerts non-antioxidant properties, including modulation of cell signaling  
18  
19 150 and immune function, regulation of transcription, and induction of apoptosis.<sup>26</sup>  
20  
21 151  
22  
23 152 Moreover, omega-3 fatty acids electrophilic derivatives formed by COX-2, in activated  
24  
25 153 macrophages can stimulate the nuclear respiratory factor (Nrf2) inducing the transcription of  
26  
27 154 neuroprotective and antioxidant related genes, and can activate the peroxisome proliferator-  
28  
29 155 activated receptor (PPAR) $\gamma$  for anti-inflammatory response.<sup>27-29</sup> In animal studies, EPA and  
30  
31 156 DHA proved to be endogenous ligands of RXRs, with positive effect on neurogenesis.<sup>30</sup>  
32  
33 157 Additionally, in 2008 Salvati and coworkers reported evidense of accelerated myelination in  
34  
35 158 DHA- and EPA-treated animals.<sup>32</sup> Moreover, DHA and EPA are reported to significantly  
36  
37 159 decrease the levels of metalloproteinases (MMP) -2, -3, -9, and -13 with a significant role in  
38  
39 160 the migration of lymphocytes into the CNS by inducing disruption of the blood brain barrier  
40  
41 161 (BBB), an important step in the formation of MS lesions.<sup>33-39</sup>  
42  
43 162  
44  
45 163 Based on the above, specific PUFA and antioxidant vitamins fulfill the criterion of biologic  
46  
47 164 plausibility and have the potential to diminish MS symptoms severity and activity, even  
48  
49 165 promoting recovery (remyelination).<sup>11</sup> Overall, PLP10 includes multiple ingredients  
50  
51  
52  
53  
54  
55  
56  
57  
58  
59  
60



1  
2  
3 166 interacting with key interconnected components within functional network modules, each  
4  
5 167 contributing a fraction of the effects of perturbations that cause the disease.<sup>40</sup>  
6  
7  
8 168

9  
10 169 In our phase II, single-center, randomized, double-blind, placebo-controlled, proof-of-  
11  
12 170 concept clinical trial we intended to evaluate the therapeutic ability of PLP10 and of two  
13  
14 171 other interventions (A and C) consisting of PLP10 constituent partial fractions versus  
15  
16 172 placebo, when used on RRMS patients.  
17  
18  
19 173  
20  
21 174

## 22 23 175 **Methods**

### 24 25 26 176 **Patients**

27  
28 177 Eligibility criteria were an age of 18 to 65; a diagnosis of RRMS according to the McDonald  
29  
30 178 criteria; a score of 0.0 to 5.5 on the EDSS, a rating that ranges from 0 to 10, with higher  
31  
32 179 scores indicating more severe disability; MRI showing lesions consistent with MS; and at  
33  
34 180 least one documented clinical relapse either receiving or not disease modifying treatment  
35  
36 181 (DMT) within the 24 months period before beginning (enrollment) of the study. Patients were  
37  
38 182 excluded because of a recent (<30 days) relapse, prior immunosuppressant or monoclonal  
39  
40 183 antibodies therapy, pregnancy or nursing, other severe disease compromising organ function,  
41  
42 184 progressive MS, history of recent drug or alcohol abuse, use of any additional food  
43  
44 185 supplement, vitamin, or any form of PUFA, history of severe allergic or anaphylactic  
45  
46 186 reactions or known specific nutritional hypersensitivity. No monitor or limitations on  
47  
48 187 patients' daily diet habits were included in the study design since the quantities of the  
49  
50 188 ingredients within the formulas daily-dosage could not be significantly affected or spoiled by  
51  
52 189 any confounding factors within any known global daily food diet (see procedures, treatment  
53  
54 190 regimen and end-points).  
55  
56  
57  
58  
59  
60

191

192 The study was conducted in accordance with the standards of the International Conference of  
193 Harmonization Guidelines for Good Clinical Practice. The protocol was developed by the  
194 investigators and it was approved by the Cyprus National Bioethics Committee and was  
195 overseen by an independent safety-monitoring committee evaluating the safety and over-all  
196 benefit-risk profiles. The adherence of care providers with the protocol was assessed by an  
197 external committee assigned by the funder of the project through reviews of case report  
198 forms. All patients gave written informed consent at the time of enrolment.

199

### 200 **Randomisation and masking**

201 Patients were randomly assigned to four intervention groups in a 1:1:1:1 ratio stratified by  
202 gender (women to men, 3:1). Randomization was facilitated by a lottery-type pool of  
203 numbered balls. Patients were randomly assigned to treatment in blocks of four by flipping a  
204 coin as follows: for the first two drawn balls heads stratified them to the groups A/B and tails  
205 stratified them to the groups C/D. The other two balls were stratified accordingly. A second  
206 toss of the coin assigned the two patients to group A (head)/B (tail) or group C (head)/D  
207 (tail). The randomization scheme was generated, performed and securely stored by Helix  
208 Incubator Organization of Nicosia University (HIONU).

209

210 The interventions had identical appearance and smell in dark bottles (15 daily-dose  
211 portions/bottle) under nitrogen bed and labeled by HIONU with code numbers, unidentifiable  
212 for both patients and investigators. Study data were collected by the investigators and saved  
213 by the HIONU that also held the blinded codes of the study. All study personnel involved in  
214 the conduct of the study were blinded throughout the study. Treating/examining physician,

1  
2  
3 215 other investigators, pharmacist, neuroradiologist and patients were masked to treatment  
4  
5 216 allocation.

6  
7 217

8  
9  
10 218 **Procedures and end points**

11 219 The specific omega-3 (re-esterified glycerides) and omega-6 (glycerides) raw materials were  
12  
13 220 purchased according to the required interventions' PUFA-fraction specification (molecular  
14  
15 221 structure, quantity/ratio and quality) with vitamin E (alpha-tocopherol) used as antioxidant  
16  
17 222 stabilizer by the supplier. The vitamins and masking aroma were purchased separately. The  
18  
19 223 mixing of fractions to the final required intervention-composition specification was always  
20  
21 224 performed by the same team of scientists under the supervision of the involved medical  
22  
23 225 biochemist and lipidology specialist, under appropriate conditions every six months.

24  
25 226 Interventions were stored refrigerated in dark until use. See Supplementary Information  
26  
27 227 Methods 1 and 2 for intervention specification detailed description and study/intervention  
28  
29 228 rational.

30  
31  
32 229

33  
34  
35 230 Participants were randomly assigned to receive a daily dose of a mixture of EPA (1,650mg) /  
36  
37 231 DHA (4,650mg) / GLA (2,000mg) / LA (3,850mg) / total other omega-3 (600mg) / total  
38  
39 232 MUFA (1,700mg) + total SFA (18:0 160mg, 16:0 650mg) / vitamin A (0.6mg) / vitamin E  
40  
41 233 (22mg) (intervention A, group A); or composed mixture of pure  $\gamma$ -tocopherol (760mg)  
42  
43 234 dispersed in pure virgin olive oil (16,137 mg) as delivery vehicle (intervention C, group C);  
44  
45 235 or a mixture of intervention formula A with intervention C without the pure virgin olive oil  
46  
47 236 (intervention B, named PLP10, group B); or placebo composed of pure virgin olive oil  
48  
49 237 (16,930mg) (intervention D, group D). Citrus-aroma was used as masking agent of the taste  
50  
51 238 and odor and added in each one of the intervention for a total of 19.5ml dosage of solution  
52  
53 239 per day. The institution's pharmacist was responsible for the appropriate storage and handling  
54  
55  
56  
57  
58  
59  
60

1  
2  
3 240 of the interventions to the individual participants. The interventions were taken orally once  
4  
5 241 daily 30 minutes before dinner by a dosage calibrated cup for 30 months. The ingredients,  
6  
7 242 ratio and dose have been selected based on their biophysical interrelation to the total known  
8  
9 243 multiple MS causing factors, their biochemical importance and the role expected to play in  
10  
11 244 the normalisation and treatment of the involved complex network of events in the disease  
12  
13 245 pathophysiology. Moreover, the high intake dosage was used to overcome any abnormal  
14  
15 246 dietary accumulation of related agents as a result of patients' food intake habits, irrespective  
16  
17 247 of geographical origin, in relation to the daily consumption ratio of the total fatty acid intake;  
18  
19 248 in order to end-up with omega-3 to omega-6 PUFA indicated physiological body ratio  
20  
21 249 composition of 1:1 wt/wt.  
22  
23  
24  
25  
26

27 251 The period beginning from July 1<sup>st</sup> 2007 (enrolment) until December 31<sup>st</sup> 2007 (entry  
28  
29 252 baseline) was used for normalization period. This six-month normalization period would  
30  
31 253 allow the interventions' agents to exert their beneficial effect (for the  
32  
33 254 incorporation/normalization of cell membranes by oral PUFA, since they need four to six  
34  
35 255 months to exert pivotal action on immune and neural cells, correction of antioxidant  
36  
37 256 deficiency and body PUFA, and optimal normalization of EPA and DHA levels/ratio).<sup>41-43</sup>  
38  
39 257 The study was completed on December 31<sup>st</sup> 2009 and the recording of relapses continued  
40  
41 258 until December 31<sup>st</sup> 2010.  
42  
43  
44  
45  
46

47 260 Depending on their clinical status and in accordance with the ethical issues governing clinical  
48  
49 261 trials participants continued receiving the indicative regular available treatments, according to  
50  
51 262 international guidelines with persistent evaluation of any side-effects and adverse events.  
52  
53 263 The study was designed to end 30 months after enrolment and clinical assessments were  
54  
55 264 scheduled at entry baseline, 3, 9, 15, 21 and 24 months on-treatment. Patients were also  
56  
57  
58  
59  
60

1  
2  
3 265 clinically examined by the treating neurologist within 48 hours after the onset of new or  
4  
5 266 recurrent neurologic symptoms.  
6

7 267

8  
9 268 The primary end point was the ARR at two years. A relapse was defined as new or recurrent  
10  
11 269 neurologic symptoms not associated with fever or infection that lasted for at least 24 hours  
12  
13 270 and accompanied by new neurologic signs. Relapses were treated with methyl-prednisolone  
14  
15 271 at a dose of 1g intravenous per day, for three days followed by prednisone orally at a dose of  
16  
17 272 1mg/kg of weight per day on a tapering scheme for three weeks. The secondary end point at  
18  
19 273 two years was the time to confirmed disability progression, defined as an increase of 1.0 or  
20  
21 274 more on EDSS, confirmed after six months (progression could not be confirmed during a  
22  
23 275 relapse). The final EDSS score was confirmed six months after the end of the study. A post-  
24  
25 276 hoc analysis was performed assessing the proportion of patients free from new or enlarging  
26  
27 277 T2 lesions on brain MRI scans at the end of the study for the per-protocol participants of the  
28  
29 278 group receiving the highest effective intervention versus placebo. Comparison was made only  
30  
31 279 versus the available archival MRI scans up to three months before the enrolment date. MRI  
32  
33 280 scans were performed and blindly analyzed at an MRI evaluation centre. The patients  
34  
35 281 continued to be followed for additional 12 months after completion of the trial and relapses  
36  
37 282 were recorded. Finally, patients were strongly encouraged to remain in the study for follow-  
38  
39 283 up assessments even if they had discontinued the study drug.  
40  
41  
42  
43  
44  
45

46 284

47 285 Blood samples were collected from all randomized patients at the time of enrolment, at every  
48  
49 286 scheduled clinical assessment and during relapses. To check individual compliance with  
50  
51 287 intake, the fatty acids composition of patients' red blood cells' membranes was determined,  
52  
53 288 by gas chromatography, according to a standard protocol. The fatty acid analyses were  
54  
55 289 performed after study termination and thus did not influence the blinding.  
56  
57  
58  
59  
60

290

291 The involved neurologist was experienced with more than 20 years in practice and trained to  
292 standardise EDSS scoring procedures, examined patients, made all medical decisions,  
293 determined the EDSS score and reviewed adverse or side-effects. The medical biochemist,  
294 specialist on lipidology and immunology and the registered clinical dietitian, members of the  
295 investigator team were experienced with more than 25 years in practice. Patients were able to  
296 contact the neurologist at any time if there was any adverse event, side-effect or allergic  
297 reaction. The study drug was not suspected to have any clinical or laboratory adverse effects  
298 different from placebo that could disturb the double-blind nature of the trial. Therefore, the  
299 same study-neurologist functioned as both the treating and evaluating physician.

300

301 Safety measures were assessed from the time of enrollment until 12 months following study  
302 completion. Haematological and biochemical tests were performed at enrolment and at every  
303 12 months, including full blood count, renal and liver function tests, proteins, cholesterol,  
304 triglycerides, glucose and electrolytes.

305

306 The whole procedure followed the clinical trial guidelines as required by the USA Food and  
307 Drug Administration, European Medicines Agency, and the Committee for Medicinal  
308 Products for Human Use.<sup>44</sup>

309

### 310 **Statistical analysis**

311 Power calculations could not be done before the study because of the lack of information  
312 from previous studies on potential effect sizes. Based on the population size of our country  
313 and the centre of reference, the CING, we were able to enrol the 20% of the total RRMS

1  
2  
3 314 patients eligible for treatment in the trial. Sample size was strictly based on this subjects'  
4  
5 315 availability parameter and the novelty of the assessed intervention.  
6

7 316

8  
9 317 Baseline characteristics were compared across all intervention groups by ANOVA or  
10  
11 318 Kruskal-Wallis rank test for continuous variables and by an exact chi-squared test for  
12  
13 319 categorical variables, as appropriate.  
14

15 320

16  
17  
18 321 For the primary outcome, the ARR was analysed in a pair-wise fashion for the active  
19  
20 322 interventions compared to placebo using negative binomial regression models adjusted for  
21  
22 323 number of relapses within two years before baseline, EDSS score at baseline and DMT. The  
23  
24 324 relapse rate was calculated as the total number of relapses divided by the total number of  
25  
26 325 patient-years followed for each treatment group. ARR differences were also calculated  
27  
28 326 among all comparable parameters and reported as percent difference.  
29

30 327

31  
32  
33 328 For the secondary end-point outcome, the time to disability progression, Kaplan–Meier  
34  
35 329 curves were constructed. Progression to disability and time thereof was compared in a pair-  
36  
37 330 wise fashion for the active interventions versus placebo by the log-rank test in the main  
38  
39 331 analysis and by Cox proportional-hazards models with adjustment for baseline EDSS score,  
40  
41 332 age and DMT in the supportive analysis. Each test was performed with a significance level of  
42  
43 333 0.05. Multivariate models considered all variables with  $P < 0.1$  on univariate models. There  
44  
45 334 was no overt violation of the proportionality assumption.  
46  
47

48 335

49  
50  
51 336 Both, per-protocol and intention to treat (ITT) analyses were performed, for different sets of  
52  
53 337 research questions to be answered, and both are reported. Missing data of the five lost to  
54  
55 338 follow patients were imputed by use of the last-observation-carried-forward (LOCF)  
56  
57  
58  
59  
60

1  
2  
3 339 approach. Due to the proof-of-concept design of the study, the considerable non-adherence  
4  
5 340 rate (49%) and the interpretation issues caused thereof regarding the ITT analysis, the per-  
6  
7 341 protocol analysis considered being more informative and appropriate method approach to  
8  
9  
10 342 answer the research addressed questions of efficacy of the interventions when subjects were  
11  
12 343 continuously following the protocol. All analyses were performed with STATA SE 10.0  
13  
14 344 (College Station, TX, USA). P-values are two-tailed.

15  
16 345

### 17 18 346 **Role of the funding source**

19  
20 347 The funders had no role in study design, data collection and analysis, decision to publish, or  
21  
22 348 preparation of the manuscript. All members of the writing group had full access to all study  
23  
24 349 data and contributed to its interpretation and prepared, reviewed, and approved the  
25  
26 350 manuscript for submission. All authors had final responsibility for the decision to submit the  
27  
28 351 paper for publication.  
29  
30

31  
32 352

## 33 34 353 **Results**

### 35 36 354 **Study population**

37  
38 355 From July 2007 through December 2010 (including the 12-month extended period), a total of  
39  
40 356 80 MS patients were randomly assigned to a study group at the CING (tertiary neurological  
41  
42 357 center).  
43  
44

45  
46 358

47  
48 359 Among the 80 patients, 20 patients were randomly assigned to each of the three groups to  
49  
50 360 receive the interventions and 20 to receive placebo (Fig 2). Baseline characteristics of both  
51  
52 361 the ITT and the per-protocol populations were similar across groups (Table 1A and 1B).  
53  
54 362 Total drop-out patients completed follow-up until study completion and were included in the  
55  
56 363 ITT analyses (Table 3). Five patients were totally lost to follow before their first scheduled  
57  
58  
59  
60



1  
2  
3 364 visit and two patients dropped-out before their first scheduled visit progressed to secondary  
4  
5 365 progressive MS. Fifteen patients dropped-out without successfully completing the  
6  
7 366 “normalization” period including five pregnancies. Another 17 patients dropped-out early  
8  
9 367 after entry baseline. Seven patients that dropped out were given monoclonal antibody  
10  
11 368 treatment (natalizumab). Overall, a total of 41 (51%) patients completed the 42-month study  
12  
13 369 (July 2007 through December 31<sup>st</sup> 2010, including the 12-month extended period) where one  
14  
15 370 patient from group A and two from the placebo group transferred on natalizumab, and 39  
16  
17 371 (49%) patients either withdrew (drop-out) or lost to follow. Reasons for study-interventions  
18  
19 372 discontinuation are listed in Figure 2.  
20  
21  
22  
23  
24

373

#### 374 **Efficacy**

#### 375 **Relapses**

25  
26  
27  
28  
29 376 As a proof-of-concept trial we primarily needed to answer whether the interventions were  
30  
31 377 effective for those MS patients who adhere to the assigned treatment, the per-protocol  
32  
33 378 analysis.<sup>45</sup> For the sake of methodological comprehensiveness we also present the ITT  
34  
35 379 analysis as a secondary analysis, to answer a different question, complementary to our core  
36  
37 380 hypothesis; like what happened to MS patients who were placed on the interventions (the  
38  
39 381 effect of assignment).<sup>45</sup> Otherwise, as a result of a high drop-out rate, an ITT analysis will not  
40  
41 382 likely be able to show the superiority of an intervention even if it is effective.<sup>45</sup> In any  
42  
43 383 instance, the proper approach of evaluating a study data is to understand what question  
44  
45 384 prompted the research and assure that the analysis is appropriate for providing the answer  
46  
47 385 whatever it is called. Both analyses can be performed for a study, using the results from the  
48  
49 386 different analyses to answer different research questions.<sup>45</sup> These interventions are original,  
50  
51 387 composed by a different treatment rational, the SM, never tested before and the important  
52  
53 388 main concern was to evaluate their efficacy and safety based on the per-protocol treated MS  
54  
55  
56  
57  
58  
59  
60

1  
2  
3 389 patients, without any peripheral noise. The question that had to be answered was: “what  
4  
5 390 happens to the patients that are placed and stick on the specific treatment”.  
6  
7 391  
8  
9 392 Regarding the per-protocol analysis, during the first year of treatment, the ARR was 0.80,  
10  
11 393 0.40, 0.78 and 0.83 for the four intervention groups respectively. During the second year, the  
12  
13 394 ARR was 0.90, 0.40, 0.67 and 1.25 for the four intervention groups respectively. Overall, for  
14  
15 395 the two-year primary end point, 8 relapses were recorded for the 10 patients in PLP10 group  
16  
17 396 (0.40 ARR) versus 25 relapses for the 12 patients in placebo (1.04 ARR), a 64% adjusted  
18  
19 397 relative rate reduction (RRR) for the PLP10 group (RRR 0.36, 95% confidence interval (CI)  
20  
21 398 0.15 to 0.87,  $p=0.024$ ) (Tables 2A, 4 and Fig 3A and 3C). Excluding patients on monoclonal  
22  
23 399 antibody (natalizumab) treatment, the observed adjusted RRR became stronger (72%) over  
24  
25 400 the two years (RRR 0.28, 95% CI 0.10 to 0.79,  $p=0.016$ , Tables 2B and 4). Pair-wise  
26  
27 401 comparisons for the other two groups against placebo did not yield statistically significant  
28  
29 402 results (Tables 2A, 2B). The proportion of patients with  $\leq 1$  relapse for the two years on-study  
30  
31 403 was higher in the PLP10 group than in the placebo group (90% vs. 42%,  $p=0.030$ , Table 4).  
32  
33 404 Seeking to investigate further the observed difference, we compared the relapse rate during  
34  
35 405 the 24 months before entry to the study to the 24 months on-treatment for each intervention  
36  
37 406 group. We observed a statistically significant relative reduction in the ARR (70%) only in the  
38  
39 407 PLP10 group (RRR 0.30; 95% CI 0.14 to 0.65,  $p=0.003$ , Table 2A); within-group  
40  
41 408 comparisons for the three other groups ARR reduction was not significant and remained not  
42  
43 409 significant when natalizumab treated patients were further excluded from the analysis. The  
44  
45 410 effect of PLP10 through time at different time-windows versus placebo for all-time on-study  
46  
47 411 patients is shown in Figures 3A to 3D. The ARR analysis, within time-windows, was not an  
48  
49 412 assigned endpoint, but it could help in the process of evaluating parallel information as the  
50  
51 413 time needed for a specific treatment intervention activity to be evident, as well as the efficacy  
52  
53  
54  
55  
56  
57  
58  
59  
60

1  
2  
3 414 profile through time. PLP10 reached maximum effect within a year on-treatment (counting  
4  
5 415 from the entry baseline) and remained stable at an ARR of 0.4, displaying a steadily reduced  
6  
7 416 ARR with long free-relapse time-windows. These group B characteristics are considered  
8  
9 417 important parameters of a successful MS treatment where the rule than the exception is the  
10  
11 418 heterogeneity among patients' disease evolution. Specifically, Figure 3D demonstrates the  
12  
13 419 dispersion of relapses throughout the 2-year period of all-time on-study (excluding patients  
14  
15 420 on natalizumab) of PLP10 (n=10) vs. placebo (n=10). Placebo, in line with the existing  
16  
17 421 knowledge of how relapse history works in relation to future relapses on MS patients  
18  
19 422 (contagion phenomenon) indicates the expected linearly increased trend of the relapse  
20  
21 423 incidence.<sup>46</sup> The same phenomenon was true for the groups A and C. Finally, during the 12  
22  
23 424 month post-study extended period (January 1<sup>st</sup> 2010 to December 31<sup>st</sup> 2010) all-time on-study  
24  
25 425 patients that received PLP10, showed persistent benefit in the ARR compared to placebo (six  
26  
27 426 relapses for the 10 subjects within PLP10, 0.6 ARR vs. 19 for the 12 subjects within placebo  
28  
29 427 group, 1.58 ARR) indicating a statistically significant 62% adjusted relative rate reduction in  
30  
31 428 the ARR for the PLP10 group (RRR 0.38, 95% CI 0.12 to 0.99, p=0.046).  
32  
33  
34  
35  
36  
37  
38  
39  
40  
41  
42  
43  
44  
45  
46  
47  
48  
49  
50  
51  
52  
53  
54  
55  
56  
57  
58  
59  
60

430 Regarding the ITT analysis, within PLP10 group, none of the nine drop-out patients changed  
431 to natalizumab and two out of nine discontinued because of pregnancy, whereas two out of  
432 seven drop-out patients from the placebo group changed to natalizumab (a total of four  
433 patients within the placebo arm population were on natalizumab, including the two patients  
434 that transferred while all-time on-study versus none within PLP10 group (Supplementary  
435 Information Fig 1). As reported, natalizumab reduces ARR by 68%, decreases the possibility  
436 of disability progression by 43% with 57% of patients free of new or enlarging T2 lesions on  
437 MRI scans compared to 15% on placebo.<sup>47</sup> The relapses of the drop-out patients are reported  
438 in Table 3A. As expected no statistically significant differences in the ARR were calculated

1  
2  
3 439 for the comparison of any group versus placebo for the 24 months on-treatment, with a 0.75  
4  
5 440 ARR within PLP10 (30 relapses) and 1.03 ARR within placebo (41 relapses) group, a 27%  
6  
7 441 ARR reduction (Table 3B). Interestingly, despite the high non-adherence rate, there was a  
8  
9 442 statistically significant difference for the comparison of the ARR in the 24 months before  
10  
11 443 entry baseline to the 24 months on-treatment for the PLP10 group (RRR 0.45, 95% CI 0.26 to  
12  
13 444 0.78,  $p=0.005$ ).

445

#### 446 **Disability progression**

447 Regarding the per-protocol analysis, at two years, the time to disability progression, with  
448 confirmation after six months (secondary end-point) was significantly longer only with  
449 PLP10. The cumulative probability of disability progression was 10% in the PLP10 group  
450 and 58% in the placebo group ( $p=0.019$ ) (Supplementary Information Fig 2). After excluding  
451 patients on natalizumab, there was an increased statistically significant difference between  
452 the PLP10 and the placebo group for the same analysis ( $p=0.006$ ) (Fig 4A). At two years, the  
453 cumulative probability of progression was 10% in the PLP10 group and 70% in the placebo  
454 group, which represents a decrease of 60 percentage points or a relative 86% decrease in the  
455 risk of sustained progression of disability within PLP10 group (adjusted hazard ratio, 0.11;  
456 95% CI 0.01 to 0.97,  $p=0.047$ ). One versus seven out of ten patients progressed to confirmed  
457 disability in the PLP10 and the placebo groups respectively when patients on natalizumab  
458 were excluded. No statistically significant difference was observed for any comparison of the  
459 other two groups compared to placebo (Fig 4A and Supplementary Information Fig 2).

460

461 Regarding the ITT analysis, at two years, the cumulative probability of progression was 10%  
462 in the PLP10 group and 35% in the placebo group ( $p=0.052$ , a trend for an effect), which  
463 represents a decrease of 25 percentage points or a relative 71% decrease of the PLP10 for the

1  
2  
3 464 risk of sustained progression of disability (adjusted hazard ratio 0.22, 95% CI 0.04 to 1.07,  
4  
5 465  $p=0.06$ ) (Fig 4B). Two versus seven out of the total randomized patients progressed to  
6  
7 466 confirmed disability in the PLP10 and the placebo groups respectively. No significant  
8  
9  
10 467 differences were observed for groups A or C against placebo (Fig 4B). The mean change in  
11  
12 468 Expanded Disability Status Scale (EDSS) score as a function of visit number is shown in  
13  
14 469 Figure 5.

15  
16  
17 470

### 18 471 **MRI**

19  
20 472 Over two years, the MRI results support the overall conclusion from the study that PLP10 has  
21  
22 473 a positive effect on disease activity since only 29% from the PLP10 group as opposed to 67%  
23  
24 474 from the placebo group developed new or enlarging T2 lesions (57% relative risk reduction).  
25  
26 475 Excluding patients on natalizumab there is an increased relative risk reduction (64%) between  
27  
28 476 PLP10 as opposed to placebo with 29% of patients on PLP10 and 80% on placebo with  
29  
30 477 development of new or enlarging T2 lesions (Table 4).  
31  
32  
33

34 478

### 35 479 **Safety**

36  
37 480 Over the course of the 30 month study no significant adverse events were reported from any  
38  
39 481 group. According to a questioner procedure the only aetiology for drop-outs was the  
40  
41 482 palatability and smell of the formula preparations. Nausea was reported by two patients. No  
42  
43 483 abnormal values observed on any of the biochemical and haematological blood tests. No  
44  
45 484 allergic reactions reported.  
46  
47  
48

49 485

### 50 486 **Discussion**

51  
52 487 In this proof-of-concept clinical trial assessing the safety and efficacy of three cocktail  
53  
54 488 intervention formulas in RRMS, we observed a significant benefit for the novel PLP10  
55  
56  
57  
58  
59  
60

1  
2  
3 489 intervention compared to placebo for both the ARR and the progression to disability. Our  
4  
5 490 results include analyses pertaining to a total of 42 months study collected data, including the  
6  
7 491 12-month, free of intervention treatment, extension period. We focused on the per-protocol  
8  
9 492 data analysis since it is the appropriate method to best provide the answer to the proof-of-  
10  
11 493 concept trial-addressed question. The high drop-out rate was solely the result of formulas  
12  
13 494 palatability, a common phenomenon in trials using oily interventions. We thus present our  
14  
15 495 main per-protocol analysis, as well as a subgroup analysis excluding patients on natalizumab.  
16  
17 496 We have found a statistically significant reduction in the ARR and the disability progression  
18  
19 497 comparing not only patients on PLP10 versus placebo but also comparing the ARR of the  
20  
21 498 PLP10 patients in the 24-month period prior to the study to the ARR of the 24 months on-  
22  
23 499 study; the observed differences became larger when patients that received natalizumab (the  
24  
25 500 most potent disease modifier) were excluded. The ARR decreased within a year on PLP10  
26  
27 501 and significantly remained stable until study completion. Statistically significant difference of  
28  
29 502 ARR between patients on PLP10 versus placebo continued for the additional 12 month  
30  
31 503 extended period (persistent effect) without significant difference on DMT. These clinical  
32  
33 504 findings are supported by the results regarding the MRI analysis where the proportion of  
34  
35 505 patients free from new or enlarging brain T2 lesions was also higher in PLP10 group versus  
36  
37 506 placebo. The persistent effect within the extended period it is considered of major importance  
38  
39 507 and supportive of the results since it is in agreement with the very long washouts, reported  
40  
41 508 necessary, for omega-3 fatty acids and especially DHA to return towards pretreatment values  
42  
43 509 within the fatty acids of plasma, platelets, monocytes and red blood cells.<sup>42</sup> This study also  
44  
45 510 provides important 30-month, placebo-controlled information about the safety of PLP10, A  
46  
47 511 and C interventions, where no any severe or significant side-effects have been reported.  
48  
49  
50  
51  
52  
53  
54 512  
55  
56  
57  
58  
59  
60

1  
2  
3 513 As medications used to treat MS become increasingly highly specific and potent, attention to  
4  
5 514 safety is paramount. Current available treatments are products of reductionism, partially  
6  
7 515 effective, associated with severe side effects without (re)myelinating or neuroprotective  
8  
9 516 abilities. Interferons and glatiramer acetate, the most widely used first-line MS drugs  
10  
11 517 available today, are associated with the least severe side-effects among MS therapies but they  
12  
13 518 are reported with only 29-33% ARR reduction and with no significant effects on the  
14  
15 519 progression of disability. Natalizumab as previously discussed and Fingolimod with 54%  
16  
17 520 ARR reduction (without significant benefit on the progression of disability) are second-line  
18  
19 521 drugs associated with severe side-effects.<sup>47, 48</sup>  
20  
21  
22  
23  
24

25 523 No existing MS treatment has ever been designed as a result of SM concept approach or with  
26  
27 524 a potential to effectively stimulate intrinsic remyelinating and neuroprotecting mechanisms or  
28  
29 525 exert such an action. Now we propose that a holistic SM model approach has to be applied by  
30  
31 526 synchronized action on all involved perturbed mechanisms. PLP10 has innovative  
32  
33 527 characteristics like no any other intervention or medication tried before for MS treatment,  
34  
35 528 with unique efficacy abilities through different mechanisms of action, probably by the  
36  
37 529 synergistic effect of its constituent ingredients. PLP10 has all the characteristics of a medical  
38  
39 530 food with the action to feed a normal metabolic process by supplying nutritional structural  
40  
41 531 membrane precursors, building blocks, and vitamins from dietary sources that enhance  
42  
43 532 remyelination and neuroprotection and simultaneously promote normalization of all cellular  
44  
45 533 membranes lipid content. The intention is to normalize the specific nutritional requirements  
46  
47 534 of the MS patients.  
48  
49  
50

51  
52 535

53  
54 536 Different factors and molecular entities appear to be part of the possible aetiology for MS  
55  
56 537 with specific PUFA and antioxidants found to be key substances related to all known  
57  
58  
59  
60

1  
2  
3 538 pathogenic and recovery mechanisms. But, it is well established that MS patients are  
4  
5 539 characterized with significant deficiencies in antioxidant efficiency as well as in PUFA levels  
6  
7 540 in blood and cellular membranes.<sup>11, 49-51</sup>  
8  
9

10 541

11 542 According to one hypothesis, the change in the ratio of omega-3 to omega-6, due to  
12  
13 543 increasing consumption of omega-6 PUFA, meaning high accumulation of AA, in the  
14  
15 544 Western diet, may be one of the major factors responsible for the increasing incidence of  
16  
17 545 inflammatory diseases relative to populations. In the Western diet, the ratio of omega-3 to  
18  
19 546 omega-6 is about 1:20–30; in populations that consume fish-based diets, the ratio is about  
20  
21 547 1:1–2.<sup>52, 53</sup> The intervention daily dose was aiming and believed to be high enough to  
22  
23 548 restore/amplify body efficient antioxidant activity and ensure cellular membranes lipid profile  
24  
25 549 normalization (PUFA content) and simultaneously potentiate involvement of the ingredients  
26  
27 550 in the anti-inflammatory and recovery mechanisms. Diet fatty acid molecules need about six  
28  
29 551 months period to exert their beneficial effect and this essential parameter was for the first  
30  
31 552 time under consideration in our study design.<sup>42</sup> This chronotherapy parameter it is of major  
32  
33 553 importance in line with the SM treatment philosophy and if it is not included in the trial  
34  
35 554 design the possibility of misleading result evaluation greatly increases. In fact, considering  
36  
37 555 that omega-3 supplementation can release and replace excess AA within the cellular  
38  
39 556 membranes, we can speculate that an increased inflammatory activity can possibly result  
40  
41 557 during the first six months of supplementation (during normalization period).  
42  
43  
44  
45  
46  
47

48 558

49 559 The maintenance of myelin requires continued turnover of its components throughout life.<sup>54,55</sup>

50 560 In addition to the EPA, DHA, LA, and GLA, PLP10 was containing limited quantities of  
51  
52 561 other structural PUFA, specific MUFA (mostly oleic acid) and SFA (palmitic and stearic  
53  
54 562 acid), specifically to provide a direct source for neuronal cell membranes rehabilitation and  
55  
56  
57  
58  
59  
60



1  
2  
3 563 for (re)myelination and neuroprotection since they are all major components, precursors and  
4  
5 564 building blocks of any new physiological myelin and cellular membranes in general.

6  
7 565 Assembly of the correct molecules into myelin membrane may be especially critical during  
8  
9  
10 566 active synthesis. Possibly, if critical constituents aren't available or are metabolically  
11  
12 567 blocked, amyelination, dysmyelination or demyelination may ensue.<sup>56</sup>

13  
14 568

15  
16 569 The well known and established safety of the ingredients used and the protocol guidelines  
17  
18 570 were supportive reasons for us to proceed with the clinical study even though with limitation  
19  
20 571 on the pre-estimation of required trial sample size as it was discussed in method section. The  
21  
22 572 adherence of the subjects is another issue but the duration of the study (42 months) is adding  
23  
24 573 power to the results;<sup>44</sup> having the research questions been consciously and carefully  
25  
26 574 approached and answered. Furthermore, the statistical methodologies used along with the  
27  
28 575 appropriate adjustments, broadly accepted for MS clinical trials, power the findings, results,  
29  
30 576 and significance. The baseline characteristics of the treatment arms could possibly be  
31  
32 577 considered indicative of four very active groups of patients but that was the result of the  
33  
34 578 limited number of RRMS population eligible for the study within Cyprus. On the other hand  
35  
36 579 the balanced baseline characteristics without statistical differences, the statistical adjustments  
37  
38 580 (for all important baseline parameters i.e. relapses, EDSS, age and DMT) and the  
39  
40 581 randomization within four different groups are the safety valves against data  
41  
42 582 misinterpretation. It is possible to question why DMTs efficacy cannot be emerged out of the  
43  
44 583 data analysis, of the four treatment arms, and in accordance to their published values. We  
45  
46 584 believe that the limited efficacy of the DMTs, the sample size and the statistical adjustments  
47  
48 585 were strong limiting determining factors for such an indication to be countable. An additional  
49  
50 586 argument is that the efficacy reported for the analysis of pre-treatment (24 months before  
51  
52 587 entry baseline) vs on-trial ARR could be considered as potentially biased due to differences  
53  
54  
55  
56  
57  
58  
59  
60

1  
2  
3 588 of how relapses were defined during the course of a study compared to pre-treatment period;  
4  
5 589 or due to regression to the mean or placebo effect. This analysis was performed as an  
6  
7 590 additional exploratory analysis that we were able to do due to the availability of data. The  
8  
9 591 relapses of the two pre-treatment years were drawn out of the patients' archival records by  
10  
11 592 the same treating neurology involved in the study (MP), and according to the patients'  
12  
13 593 hospitalization date for receiving intravenous methyl-prednisolone. This analysis was not  
14  
15 594 used as a primary or a secondary end-point under investigation although it is usually reported  
16  
17 595 by many clinical studies. As a matter of fact many early phase trials are based only on such  
18  
19 596 an analysis (before vs after treatment results). In almost all MS trials the number of relapses  
20  
21 597 within the two years before baseline is a factor under adjustment for the statistical analyses.<sup>48</sup>  
22  
23 598 The inclusion of the post-hoc MRI analysis is another limiting factor that needs attention  
24  
25 599 since it was used as an additional aside exploratory approach (due to study budget limitations  
26  
27 600 it was not possible to be used as a formal endpoint); but the MRI evaluation was blinded and  
28  
29 601 can be considered as representative of the randomized subjects within the treatment arms. As  
30  
31 602 far as the regression to the mean and the placebo effect concerns we believe that the 6-month  
32  
33 603 normalization period is an accountable and valuable eliminating factor of the possible effect;  
34  
35 604 as well as the presence of four groups, where only the PLP10 treatment arm is associated  
36  
37 605 with statistically significant efficacy vs placebo. It is a placebo-controlled study after all.  
38  
39 606  
40  
41  
42  
43  
44  
45 607 Our observations are consistent with the idea that simultaneous availability of specific PUFA  
46  
47 608 along with other major membrane and myelin building blocks in combination with specific  
48  
49 609 antioxidants, within optimum quantity, quality, ratio and structural form can possibly result to  
50  
51 610 a more appropriate holistic therapy reducing MS disease activity. This is probably succeeded  
52  
53 611 through synergistic and/or simultaneous effect on the interactions and dynamics of the most  
54  
55 612 probable environmental and biological disease causing factors that induce complex biological  
56  
57  
58  
59  
60

1  
2  
3 613 network of events for disease pathogenesis and evolution; as well as on the protective and  
4  
5 614 reparative mechanisms. We can additionally speculate that the nature of the intervention  
6  
7 615 formula cannot be prohibitive for its use as preventive regimen and does not preclude  
8  
9 616 probable positive efficacy on the other types of MS, but has to be further investigated. A  
10  
11 617 larger size multicenter clinical trial will better establish PLP10 place in the armamentarium of  
12  
13 618 treatments for MS.  
14  
15  
16  
17  
18  
19  
20  
21  
22  
23  
24  
25  
26  
27  
28  
29  
30  
31  
32  
33  
34  
35  
36  
37  
38  
39  
40  
41  
42  
43  
44  
45  
46  
47  
48  
49  
50  
51  
52  
53  
54  
55  
56  
57  
58  
59  
60

619  
620 It is commonly accepted that nutrition is one of the possible environmental factors involved  
621 in the pathogenesis of MS, but its role as complementary MS treatment is unclear and largely  
622 disregarded.<sup>57</sup> Dietary antioxidants and fatty acids may influence the disease process in MS  
623 by reducing immune-mediated inflammation, oxidative stress and excitotoxic damage.<sup>11</sup>  
624 Present data reveal that healthy dietary molecules have a pleiotropic role and are able to  
625 change cell metabolism from anabolism to catabolism and down-regulate inflammation by  
626 interacting with enzymes, nuclear receptors and transcriptional factors.<sup>57</sup> The present study,  
627 for the first time provides strong link evidence between dietary, metabolic, immunological,  
628 and neurobiological aspects of MS after three quarters of a century of unsuccessful scientific  
629 efforts. This might probably be the beginning of opening new horizons and new avenues in  
630 the approach of MS prevention and treatment, and possibly of other multifactorial chronic  
631 diseases, including neurodegenerative and autoimmune as well.  
632  
633  
634  
635  
636  
637

| <b>1a.</b>                                 |                   |                    |                   |                   |              |
|--------------------------------------------|-------------------|--------------------|-------------------|-------------------|--------------|
| Characteristics                            | Group A<br>(n=20) | Group B†<br>(n=20) | Group C<br>(n=20) | Placebo<br>(n=20) | P-<br>value  |
| <b>Sex</b>                                 |                   |                    |                   |                   |              |
| Female - no. (%)                           | 15 (75)           | 15 (75)            | 15 (75)           | 15 (75)           | <b>1.000</b> |
| <b>Age (yr)</b>                            |                   |                    |                   |                   |              |
| Mean ± Standard Deviation (SD)             | <b>38.0±11.9</b>  | <b>36.9±8.4</b>    | <b>37.7±8.7</b>   | <b>38.1±10.9</b>  | <b>0.982</b> |
| Median (Range)                             | 38.0 (22–65)      | 37.0 (25–61)       | 36.5 (24–54)      | 36.0 (21–58)      |              |
| <b>Treatment history</b>                   |                   |                    |                   |                   |              |
| Patients on DMT- no. (%)                   | 11 (55)           | 9 (45)             | 12 (60)           | 10 (50)           | <b>0.875</b> |
| <b>Pre-treatment disease duration (yr)</b> |                   |                    |                   |                   |              |
| Mean ± SD                                  | <b>9.0±7.6</b>    | <b>8.6±4.8</b>     | <b>8.6±5.3</b>    | <b>7.7±5.7</b>    | <b>0.909</b> |
| Median (Range)                             | 7.5 (2–37)        | 8.0 (2–20)         | 8.0 (3–24)        | 6.5 (2–25)        |              |
| <b>Pre-treatment relapses‡</b>             |                   |                    |                   |                   |              |
| Mean ± SD                                  | <b>2.33±1.68</b>  | <b>2.41±1.73</b>   | <b>2.31±1.66</b>  | <b>2.10±1.32</b>  | <b>0.946</b> |
| Median (Range)                             | 2.0 (1–6)         | 2.0 (1–7)          | 2.0 (1–6)         | 2.0 (1–4)         |              |
| ARR                                        | <b>1.17</b>       | <b>1.21</b>        | <b>1.16</b>       | <b>1.05</b>       | <b>0.946</b> |
| Patients -% with ≤1 relapse                | 40                | 45                 | 40                | 35                |              |
| <b>Baseline EDSS score‡</b>                |                   |                    |                   |                   |              |
| Mean ± SD                                  | <b>2.52±1.23</b>  | <b>2.15±1.05</b>   | <b>2.42±1.21</b>  | <b>2.39± 0.93</b> | <b>0.775</b> |
| Median (Range)                             | 2.5 (1.0–5.5)     | 2.0 (1.0–4.0)      | 2.5 (0.0–5.0)     | 2.5 (1.0–4.0)     |              |
| <b>1b.</b>                                 |                   |                    |                   |                   |              |
| Characteristics                            | Group A<br>(n=10) | Group B†<br>(n=10) | Group C<br>(n=9)  | Placebo<br>(n=12) | P-<br>value  |
| <b>Sex</b>                                 |                   |                    |                   |                   |              |
| Female - no. (%)                           | 5 (50)            | 7 (70)             | 6 (66.6)          | 10 (83.3)         | <b>0.419</b> |
| <b>Age (yr)</b>                            |                   |                    |                   |                   |              |
| Mean ± SD                                  | <b>36.6±13.5</b>  | <b>34.80±5.4</b>   | <b>40.9±8.1</b>   | <b>39.8±13.2</b>  | <b>0.572</b> |
| Median (Range)                             | 34.5 (22–65)      | 34.5 (26–43)       | 40.0 (29–54)      | 37.5 (21–58)      |              |
| <b>Treatment history</b>                   |                   |                    |                   |                   |              |
| Patients on DMT- no. (%)                   | 6 (60)            | 4 (40)             | 6 (67)            | 6 (50)            | <b>0.949</b> |
| <b>Pre-treatment disease duration (yr)</b> |                   |                    |                   |                   |              |
| Mean ± SD                                  | <b>9.7±10.0</b>   | <b>8.3±5.3</b>     | <b>11.3±6.1</b>   | <b>8.7± 7.1</b>   | <b>0.807</b> |
| Median (Range)                             | 7.5 (2–37)        | 8.0 (2–20)         | 8.0 (4–24)        | 5.5 (2–25)        |              |
| <b>Pre-treatment relapses</b>              |                   |                    |                   |                   |              |

|                             |               |               |               |               |       |
|-----------------------------|---------------|---------------|---------------|---------------|-------|
| Mean ± SD                   | 2.20±1.47     | 2.70±1.25     | 1.78±0.66     | 1.67±1.37     | 0.241 |
| Median (Range)              | 2.0 (1 – 6)   | 2.5 (1 – 4)   | 2.0 (1 – 3)   | 1.5 (1 – 4)   |       |
| ARR                         | 1.10          | 1.35          | 0.89          | 0.83          |       |
| Patients -% with ≤1 relapse | 30            | 20            | 33            | 50            |       |
| <b>Baseline EDSS score</b>  |               |               |               |               |       |
| Mean ± SD                   | 2.65±1.37     | 2.40±1.12     | 2.11±1.02     | 2.16±0.96     | 0.698 |
| Median (Range)              | 3.0 (1.0–5.5) | 2.5 (1.0–4.0) | 2.0 (1.0–4.0) | 2.0 (1.0–3.5) |       |

† PLP10 group

‡ Available data at Entry Baseline (n=18 for group A, n=17 for group B, n=19 for group C, n=19 for group D)

**Table 1.** The table section 1a reports the demographics and baseline disease characteristics for total randomized population by treatment arm.

The table section 1b reports the demographics and baseline disease characteristics of all-time on-study population by treatment arm. There were no significant between study-group differences at baseline for any characteristic.

638

639

640

641

642

643

644

645

646

647

648

649

650

651

| <b>2a.</b>                                                                                                                                                                                                    |                   |             |                    |             |                  |             |                   |             |
|---------------------------------------------------------------------------------------------------------------------------------------------------------------------------------------------------------------|-------------------|-------------|--------------------|-------------|------------------|-------------|-------------------|-------------|
| Characteristics                                                                                                                                                                                               | Group A<br>(N=10) |             | Group B†<br>(N=10) |             | Group C<br>(N=9) |             | Placebo<br>(N=12) |             |
| End Point                                                                                                                                                                                                     | X                 | Y           | X                  | Y           | X                | Y           | X                 | Y           |
| Total No. of relapses                                                                                                                                                                                         | 22                | 17          | 27                 | 8           | 16               | 13          | 20                | 25          |
| <b>Annual Relapse Rate (ARR)</b>                                                                                                                                                                              | <b>1.10</b>       | <b>0.85</b> | <b>1.35</b>        | <b>0.40</b> | <b>0.88</b>      | <b>0.72</b> | <b>0.83</b>       | <b>1.04</b> |
| <b>% Reduction Compared to Placebo (primary endpoint) (Ys)¶</b>                                                                                                                                               | <b>-18</b>        |             | <b>-62</b>         |             | <b>-30</b>       |             | <b>N/A</b>        |             |
| <b>P Value against placebo</b>                                                                                                                                                                                | <b>0.468</b>      |             | <b>0.024</b>       |             | <b>0.578</b>     |             |                   |             |
| <b>ARR change -% (Y to X)¶</b>                                                                                                                                                                                | <b>-23</b>        |             | <b>-70</b>         |             | <b>-18</b>       |             | <b>+25</b>        |             |
| <b>P value against baseline</b>                                                                                                                                                                               | <b>0.425</b>      |             | <b>0.003</b>       |             | <b>0.578</b>     |             | <b>0.500</b>      |             |
| X: Total number of relapses of 24 months pre-treatment (baseline)<br>Y: Total number of relapses of 24 months on-treatment<br>¶ Unadjusted estimate                                                           |                   |             |                    |             |                  |             |                   |             |
| <b>2b.</b>                                                                                                                                                                                                    |                   |             |                    |             |                  |             |                   |             |
| <b>Excluding patients on natalizumab</b>                                                                                                                                                                      | Group A<br>(N=9)  |             | Group B†<br>(N=10) |             | Group C<br>(N=9) |             | Placebo<br>(N=10) |             |
| End Point                                                                                                                                                                                                     | X                 | Y           | X                  | Y           | X                | Y           | X                 | Y           |
| Total No. of relapses                                                                                                                                                                                         | 16                | 15          | 27                 | 8           | 16               | 13          | 13                | 19          |
| <b>Annual Relapse Rate (ARR)</b>                                                                                                                                                                              | <b>0.88</b>       | <b>0.83</b> | <b>1.35</b>        | <b>0.40</b> | <b>0.88</b>      | <b>0.72</b> | <b>0.65</b>       | <b>0.95</b> |
| <b>% Reduction Compared to Placebo (primary endpoint) (Ys)¶</b>                                                                                                                                               | <b>-13</b>        |             | <b>-58</b>         |             | <b>-24</b>       |             | <b>N/A</b>        |             |
| <b>P Value against placebo</b>                                                                                                                                                                                | <b>0.493</b>      |             | <b>0.016</b>       |             | <b>0.412</b>     |             |                   |             |
| <b>ARR change -% (Y to X)¶</b>                                                                                                                                                                                | <b>-6</b>         |             | <b>-70</b>         |             | <b>-18</b>       |             | <b>+46</b>        |             |
| <b>P value against baseline</b>                                                                                                                                                                               | <b>0.857</b>      |             | <b>0.003</b>       |             | <b>0.578</b>     |             | <b>0.354</b>      |             |
| X: Total number of relapses of 24 months pre-treatment (baseline)<br>Y: Total number of relapses of 24 months on-treatment<br>† PLP10 group<br>¶ Unadjusted estimate                                          |                   |             |                    |             |                  |             |                   |             |
| <b>Table 2.</b> The table section 2a reports the two year primary end points of ARR of all-time on-study population by treatment arm and percent difference with placebo. During the 24mo period on-treatment |                   |             |                    |             |                  |             |                   |             |

1  
2  
3 the ARR of the group A was 0.85 with 18% decrease compared to placebo (p=0.468), of PLP10 group  
4 0.40 with 62% decrease (p=0.024), and of group C 0.72 with 30% decrease (p=0.578) and reports the  
5 comparison of the 24mo pre-treatment ARR (baseline ARR) to 24mo on-treatment ARR of all-time on-  
6 study population including patients on natalizumab.  
7  
8  
9  
10

11  
12  
13  
14 The table section 2b reports comparison of the 24mo pre-treatment ARR to 24mo on-treatment ARR of  
15 all-time on-study population excluding patients on natalizumab; and the comparison of the ARR during  
16 the 24mo period on-treatment (primary end point) between each one of the groups against placebo.  
17  
18  
19  
20

21 652

22 653

23 654

24 655

25 656

26 657

27 658

28 659

29 660

30 661

31 662

32 663

33 664

34 665

35 666

36 667

37 668

38 669

39

40

41

42

| <b>3a.</b>                                                                                                                                                           |                   |             |                    |             |                   |             |                   |             |
|----------------------------------------------------------------------------------------------------------------------------------------------------------------------|-------------------|-------------|--------------------|-------------|-------------------|-------------|-------------------|-------------|
| Characteristics                                                                                                                                                      | Group A<br>(N=8)  |             | Group B†<br>(N=7)  |             | Group C<br>(N=10) |             | Placebo<br>(N=7)  |             |
|                                                                                                                                                                      | X                 | Y           | X                  | Y           | X                 | Y           | X                 | Y           |
| No. of Relapses                                                                                                                                                      | 20                | 14          | 14                 | 14          | 27                | 26          | 20                | 13          |
| <b>Annual Relapse Rate (ARR)</b>                                                                                                                                     | <b>1.25</b>       | <b>0.88</b> | <b>1.00</b>        | <b>1.00</b> | <b>1.35</b>       | <b>1.30</b> | <b>1.42</b>       | <b>0.92</b> |
| X: Total number of relapses of 24 months pre-treatment<br>Y: Total number of relapses of 24 months on-treatment                                                      |                   |             |                    |             |                   |             |                   |             |
| <b>3b.</b>                                                                                                                                                           |                   |             |                    |             |                   |             |                   |             |
| Characteristics                                                                                                                                                      | Group A<br>(N=20) |             | Group B†<br>(N=20) |             | Group C<br>(N=20) |             | Placebo<br>(N=20) |             |
| End Point                                                                                                                                                            | X                 | Y           | X                  | Y           | X                 | Y           | X                 | Y           |
| No. of Relapses                                                                                                                                                      | 45                | 34          | 49                 | 30          | 46                | 41          | 43                | 41          |
| <b>Annual Relapse Rate (ARR)</b>                                                                                                                                     | <b>1.13</b>       | <b>0.85</b> | <b>1.23</b>        | <b>0.75</b> | <b>1.15</b>       | <b>1.03</b> | <b>1.08</b>       | <b>1.03</b> |
| ARR Reduction -% (Y to X)¶                                                                                                                                           | -25               |             | -39                |             | -10               |             | -5                |             |
| <b>P value against baseline</b>                                                                                                                                      | <b>0.120</b>      |             | <b>0.005</b>       |             | <b>0.475</b>      |             | <b>0.652</b>      |             |
| <b>% Reduction of the ARR Compared to Placebo (Ys)¶</b>                                                                                                              | <b>-18</b>        |             | <b>-27</b>         |             | <b>0.0</b>        |             | <b>N/A</b>        |             |
| <b>P Value against placebo</b>                                                                                                                                       | <b>0.447</b>      |             | <b>0.121</b>       |             | <b>0.996</b>      |             |                   |             |
| X: Total number of relapses of 24 months pre-treatment (baseline)<br>Y: Total number of relapses of 24 months on-treatment<br>¶ Unadjusted estimate<br>† PLP10 group |                   |             |                    |             |                   |             |                   |             |

**Table 3.** The table section 3a reports the two year primary end point of relapses based on study design as reported by drop-out patients by Treatment Arm. The most drop-out patients that went on disease modified therapy (DMT) were from the group A and placebo with three and two patients respectively on natalizumab. These parameters justify the decreased number of relapses recorded within group A and placebo drop-outs; and this could affect the ITT analysis in favor of placebo when the total two-year recorded data are used. For PLP10 group, 14 relapses were reported at baseline and remained the same during the two-year study. For placebo, 20 relapses were reported at baseline and decreased to 13 during the two-



1  
2  
3 year study. This is expected since, for PLP10 group 43% of the drop-outs were under DMT at  
4 entry baseline and remained the same until the end of the study with no patient on  
5 natalizumab; but 57% of the placebo group drop-outs that were under DMT at entry baseline  
6 increased to 86% at the end of the study including two patients on natalizumab.  
7  
8  
9  
10

11  
12  
13  
14 The table section 3b reports comparison of 24 months pre-treatment ARR (baseline) to 24  
15 months on-treatment ARR of total randomized population, by treatment arm. The ARR of  
16 PLP10 group was 1.23 at baseline and 0.75 at the end of the study (39% reduction  $p=0.005$ ),  
17 and for placebo 1.08 at baseline and 1.03 at the end of the study (5% reduction  $p=0.652$ ). No  
18 statistical difference was calculated for the other two treatment arms. During the 24 months  
19 on-treatment, PLP10 group presented a 27% reduction of ARR vs. placebo ( $p=0.121$ ), with all  
20 groups without statistically significant results.  
21  
22  
23  
24  
25  
26  
27  
28  
29

30 670

31  
32  
33 67134  
35  
36  
37 67238  
39  
40 67341  
42  
43 67444  
45  
46  
47 67548  
49  
50 67651  
52  
53 67754  
55  
56  
57 678  
58  
59  
60

| <b>4.</b>                                                                                                            |                   |                            |                  |                    |                                     |
|----------------------------------------------------------------------------------------------------------------------|-------------------|----------------------------|------------------|--------------------|-------------------------------------|
| Characteristics*                                                                                                     | Group A<br>(n=10) | Group B<br>PLP10<br>(n=10) | Group C<br>(n=9) | Placebo<br>(n=12)  | P-value<br>Group<br>B vs<br>Placebo |
| Annual relapse rate over 1 year**                                                                                    | <b>0.80</b>       | <b>0.40</b>                | <b>0.78</b>      | <b>0.83</b>        |                                     |
| Total number of relapses**                                                                                           | 8                 | 4                          | 7                | 10                 |                                     |
| <b>Primary end points</b>                                                                                            |                   |                            |                  |                    |                                     |
| Annual relapse rate over 2 years (95% CI)**                                                                          | 0.85              | <b>0.40 (0.15-0.87)</b>    | 0.72             | <b>1.04</b>        | <b>0.024</b>                        |
| Total number of relapses**                                                                                           | 17                | 8                          | 13               | 25                 |                                     |
| <b>Excluding patients on natalizumab</b>                                                                             |                   |                            |                  |                    |                                     |
| Annual relapse rate over 2 years (95% CI)                                                                            | 0.83              | <b>0.40 (0.10-0.79)</b>    | 0.72             | <b>0.95</b>        | <b>0.016</b>                        |
| Total number of relapses                                                                                             | 15                | <b>8</b>                   | 13               | <b>19</b>          |                                     |
| <b>Secondary end points</b>                                                                                          |                   |                            |                  |                    |                                     |
| Cumulative probability of sustained progression increase by 1 point on EDSS confirmed after 6 mo, over 2 years -% ** | 43                | <b>10 (1/10)</b>           | 24               | <b>58 (7/12)</b>   | <b>0.019</b>                        |
| <b>Excluding patients on natalizumab</b>                                                                             |                   |                            |                  |                    |                                     |
| cumulative probability of sustained progression increase by 1 point on EDSS confirmed after 6 mo, over 2 years -%    | 33                | <b>10 (1/10)</b>           | 24               | <b>70 (7/10)</b>   | <b>0.006</b>                        |
| <b>Exploratory Results</b>                                                                                           |                   |                            |                  |                    |                                     |
| Patients proportion with ≤1 relapse over 2 years -% **                                                               | 50 (5/10)         | <b>90 (9/10)</b>           | 56 (5/9)         | <b>42 (5/12)</b>   | <b>0.030</b>                        |
| <b>MRI</b>                                                                                                           |                   |                            |                  |                    |                                     |
| Patients proportion with new or enlarging T2 lesions-% **                                                            | ----              | <b>29 (2/7)</b>            | ----             | <b>67 (4/6)</b>    |                                     |
| <b>Excluding patients on natalizumab</b>                                                                             |                   |                            |                  |                    |                                     |
| Patients proportion with no new or enlarging T2 lesions-%                                                            | ----              | <b>29 (2/7)</b>            | ----             | <b>80 (4/5)</b>    |                                     |
| <b>DMT (interferons, glatiramer acetate) and natalizumab</b>                                                         |                   |                            |                  |                    |                                     |
| Patients proportion on DMT and natalizumab at the end of 2 years-% **                                                | 80 (8/10)†        | <b>60 (6/10)</b>           | 67 (6/9)         | <b>75 (9/12) ‡</b> | <b>0.747</b>                        |
| * CI denotes confidence interval.                                                                                    |                   |                            |                  |                    |                                     |
| ** Including patients on natalizumab                                                                                 |                   |                            |                  |                    |                                     |
| † 1 out of 10 on natalizumab                                                                                         |                   |                            |                  |                    |                                     |
| ‡ 2 out of 12 on natalizumab                                                                                         |                   |                            |                  |                    |                                     |

**Table 4.** Clinical end points, according to study group for all-time on-study population.

679

1  
2  
3 680 Acknowledgments: We thank all participant patients. We thank Thyrsos Posporis MD and the  
4  
5 681 central reading centre (Ayios Therissos Medical Diagnostic Centre, Nicosia, Cyprus), and  
6  
7 682 Eleni Eracleous, MD (neuroradiologist) for the contribution on the MRI scans and their team  
8  
9  
10 683 for the MRI reading. Special thanks to Elena Kkolou the pharmacist involved in the study and  
11  
12 684 Eftychia Gaglia for her nursing contribution and collection of blood from the patients. We  
13  
14 685 also thank Demetris Hadjisofoklis and Ioanna Leontiou (University of Nicosia, Helix  
15  
16 686 Business incubator) for their contribution on randomization process, data collection, filing  
17  
18 687 and blind codes keeping. Additionally we would like to thank the CING for hosting the  
19  
20  
21 688 project. Moreover, we thank the Cyprus Ministry of Commerce, Industry and Tourism for  
22  
23 689 funding the project; and Yasoo Health Ltd., for providing some of the raw materials in  
24  
25 690 exchange of investigating, on their behalf, the efficacy and safety of  $\gamma$ -tocopherol.  
26  
27  
28 691

29  
30 692 Contributors: All authors interpreted the data. I.S.P drafted the report and figures and all  
31  
32 693 authors critically revised and approved the final version. M.C.P and I.S.P were responsible  
33  
34 694 for the protocol and study design. M.C.P was the evaluator of patients' clinical progress signs  
35  
36 695 and the treatment physician. I.S.P and G.N.L were involved in the non-pharmacologic  
37  
38 696 treatment-related care. I.S.P performed the literature search and both I.S.P and G.N.L  
39  
40 697 contributed on the intervention formulation and composition rational. I.S.P supervised the  
41  
42 698 composition procedure of the interventions and the fatty acid profile analysis of the red blood  
43  
44 699 cell membranes. E.E.N and I.S.P performed the statistical analyses. E.E.N was an  
45  
46  
47 700 independent scientist. All authors vouch for the accuracy and completeness of the data and  
48  
49 701 the statistical analyses.  
50  
51  
52 702

1  
2  
3 703 Funding: Supported by a grand from the Cyprus Ministry of Commerce, Industry and  
4  
5 704 Tourism, program for the creation of new high technology and innovation enterprises through  
6  
7 705 the business incubator.  
8

9  
10 706

11 707 Competing interest: M.C.P, G.N.L, I.S.P received grand support from the Cyprus Ministry of  
12  
13 708 Commerce, Industry and Tourism, Program for the Creation of New High Technology and  
14  
15 709 Innovation Enterprises through the Business Incubator. PALUPA Medical Ltd. is a research  
16  
17 710 company formed and registered for completion of the study, as required by the Governments'  
18  
19 711 funding grand program. M.C.P, G.N.L, I.S.P, and CING are all stockholders of the PALUPA  
20  
21 712 Medical Ltd. M.C.P is an employee at the CING. I.S.P is a senior research collaborator  
22  
23 713 hosted by the CING. G.N.L is a CING collaborator. E.E.N declares no-competing interest.  
24  
25 714 No pharmaceutical companies were involved in this phase II clinical trial. The intervention is  
26  
27 715 under a USA provisional patent; Application Number 61469081.  
28  
29  
30  
31

32 716

33  
34 717 Ethical approval: Cyprus National bioethics committee (reference EEBK/EII/2005/10).  
35

36 718

37  
38 719 All authors have completed the Unified Competing Interest form at  
39  
40 720 [www.icmje.org/coi\\_disclosure.pdf](http://www.icmje.org/coi_disclosure.pdf) (available on request from the corresponding author) and  
41  
42 721 declare that (1) M.C.P, G.N.L, I.S.P have support from Cyprus Ministry of Commerce,  
43  
44 722 Industry and Tourism, Program for the Creation of New High Technology and Innovation  
45  
46 723 Enterprises through the Business Incubator for the submitted work; (2) E.E.N has no  
47  
48 724 relationships with Cyprus Ministry of Commerce, Industry and Tourism, or PLUPA Medical  
49  
50 725 Ltd. that might have an interest in the submitted work in the previous 3 years; (3) their  
51  
52 726 spouses, partners, or children have no financial relationships that may be relevant to the  
53  
54  
55  
56  
57  
58  
59  
60

1  
2  
3 727 submitted work; and (4) E.E.N has a non-financial interests that may be relevant to the  
4  
5 728 submitted work.  
6  
7

8 729

9  
10  
11 730 The Corresponding Author has the right to grant on behalf of all authors and does grant on  
12  
13 731 behalf of all authors, an exclusive license on a worldwide basis to the BMJ Publishing Group  
14  
15 732 Ltd and its Licensees to permit this article (if accepted) to be published in BMJ editions and  
16  
17 733 any other BMJ PGL products and sublicences to exploit all subsidiary rights, as set out in our  
18  
19 734 licence ( <http://resources.bmj.com/bmj/authors/checklists-forms/licence-for-publication>)."  
20  
21  
22

23 735 Data Sharing:

24  
25  
26 736 No additional unpublished data from the study are available  
27  
28

29 737  
30  
31  
32

## Article Summary

### Article focus:

- The increasing prevalence of Multiple Sclerosis (MS), the limited efficacy and the side effects of the existing treatments urge the clinical need for the development of new, innovative, more effective, safe, and preventive treatment strategies.
- For the first time we propose three original nutraceutical treatment intervention-cocktails, formulated based on systems medicine through nutritional systems biology rational; with PLP10 representing the complete composition of the formulation and the other two treatments represent partial formulations.
- We have studied the proposed interventions on 80 relapsing remitting MS patients (four

1  
2  
3 groups of 20 each) for a total of 42 months, in a randomized, double-blind, placebo-  
4  
5 controlled, phase II proof-of-concept clinical trial.  
6  
7  
8

9  
10 **Key messages:**

- 11 • The per-protocol data analyses indicated that PLP10 is associated with significant  
12 efficacy vs placebo on both reducing the annualized relapse rate and disease progression  
13 without adverse or significant side effects.  
14  
15
- 16 • PLP10 has probably the ability to interfere with the total known repertoire of mechanisms  
17 involved in MS pathogenesis as well as with the recovery mechanisms, neuroprotection  
18 and remyelination.; it is potentially able to manipulate global perturbed networks of the  
19 disease causing factors rather than focusing only on unique failing components.  
20  
21
- 22 • This proof-of-concept clinical study might be indicative and the beginning of new  
23 avenues in MS prevention and treatment and of new epoch of novel drug development  
24 with dynamic therapeutic potential for chronic complex multifactorial diseases.  
25  
26  
27  
28  
29  
30  
31  
32

33  
34  
35  
36 **Strengths and limitations of this study:**

- 37 • The strength of this study is the systems medicine therapeutic approach, the length of the  
38 study the inclusion of the six months normalization (chronotherapy) period, and the study  
39 protocol following all indicated appropriate guidelines with definite inclusion/exclusion  
40 criteria and primary/secondary end points.  
41  
42
- 43 • The sample size and the high rate of drop-outs (palatability of the formula) are the  
44 limitations associated with the present study.  
45  
46
- 47 • A phase III multi-center clinical trial will establish the present intervention regime among  
48 the best choices among neurodegenerative diseases prophylaxis and MS treatment drugs  
49 faretra.  
50  
51  
52  
53  
54  
55  
56  
57  
58  
59  
60

738

739 **References**

- 740 1. Baranzini SE, Oksenberg JR, Hauser SL. New insights into the genetics of multiple  
741 sclerosis. *Journal of Rehabilitation Research and Development* 2002;39:201-210.
- 742 2. Goni J, Esteban FJ, de Mendizabal NV, et al. A computational analysis of protein-  
743 protein interaction networks in neurodegenerative diseases. *BMC Syst Biol*  
744 2008;2:52.
- 745 3. Lobo I. Multifactorial inheritance and genetic disease. *Nature Education* 2008; 1.
- 746 4. Compston A, Coles A. Multiple sclerosis. *Lancet* 2002;359:1221.
- 747 5. Evans PH. Free radicals in brain metabolism and pathology. *British Medical Bulletin*  
748 1993;49:577-587.
- 749 6. Knight J. Reactive oxygen species and the neurodegenerative disorders. *Ann Clin Lab*  
750 *Sci* 1997;27:11-25.
- 751 7. Matute C, Alberdi E, Domercq M, Pérez-Cerdá F, Pérez-Samartín A, Sánchez-Gómez  
752 MV. The link between excitotoxic oligodendroglial death and demyelinating diseases.  
753 *Trends in Neurosciences* 2001;24:224-230.
- 754 8. Owens T. The enigma of multiple sclerosis: inflammation and neurodegeneration  
755 cause heterogeneous dysfunction and damage. *Current Opinion in Neurology*  
756 2003;16:259-265.
- 757 9. Smith KJ, Kapoor R, Felts PA. Demyelination: The role of reactive oxygen and  
758 nitrogen species. *Brain Pathology* 1999;9:69-92.
- 759 10. Ahn AC, Tewari M, Poon C-S, Phillips RS. The Clinical Applications of a Systems  
760 Approach. *PLoS Med* 2006;3:e209.

- 1  
2  
3 761 11. van Meeteren ME, Teunissen CE, Dijkstra CD, van Tol EAF. Antioxidants and  
4  
5 762 polyunsaturated fatty acids in multiple sclerosis. *Eur J Clin Nutr* 2005;59:1347-1361.  
6  
7 763 12. Calder PC. n-3 Polyunsaturated fatty acids, inflammation, and inflammatory diseases.  
8  
9 764 *The American Journal of Clinical Nutrition* 2006;83:S1505-1519S.  
10  
11 765 13. Piani D, Fontana A. Involvement of the cystine transport system xc- in the  
12  
13 766 macrophage- induced glutamate-dependent cytotoxicity to neurons. *The Journal of*  
14  
15 767 *Immunology* 1994;152:3578-3585.  
16  
17  
18 768 14. Youdim KA, Martin A, Joseph JA. Essential fatty acids and the brain: possible health  
19  
20 769 implications. *International Journal of Developmental Neuroscience* 2000;18:383-399.  
21  
22  
23 770 15. Calder PC. Dietary modification of inflammation with lipids. *Proceedings of the*  
24  
25 771 *Nutrition Society* 2002;61:345-358.  
26  
27 772 16. Gil Á. Polyunsaturated fatty acids and inflammatory diseases. *Biomedecine &*  
28  
29 773 *Pharmacotherapy* 2002;56:388-396.  
30  
31  
32 774 17. Ariel A, Serhan CN. Resolvins and protectins in the termination program of acute  
33  
34 775 inflammation. *Trends in Immunology* 2007;28:176-183.  
35  
36 776 18. Arita M, Ohira T, Sun Y-P, Elangovan S, Chiang N, Serhan CN. Resolvin E1  
37  
38 777 selectively interacts with leukotriene B4 receptor BLT1 and chemR23 to regulate  
39  
40 778 inflammation. *The Journal of Immunology* 2007;178:3912-3917.  
41  
42  
43 779 19. Janakiram NB, Rao CV. Role of Lipoxins and Resolvins as Anti-Inflammatory and  
44  
45 780 Proresolving Mediators in Colon Cancer. *Current Molecular Medicine* 2009;9:565-  
46  
47 781 579.  
48  
49 782 20. Serhan C, Arita M, Hong S, Gotlinger K. Resolvins, docosatrienes, and  
50  
51 783 neuroprotectins, novel omega-3-derived mediators, and their endogenous aspirin-  
52  
53 784 triggered epimers. *Lipids* 2004;39:1125-1132.  
54  
55  
56  
57  
58  
59  
60



- 1  
2  
3 785 21. Serhan CN, Chiang N, Van Dyke TE. Resolving inflammation: dual anti-  
4  
5 786 inflammatory and pro-resolution lipid mediators. *Nat Rev Immunol* 2008;8:349-361.  
6  
7 787 22. Rossetti RG, Seiler C, DeLuca P, Laposata M, Zurier R. Oral administration of  
8  
9 788 unsaturated fatty acids: effects on human peripheral blood T lymphocyte proliferation.  
10  
11 789 *Journal of Leukocyte Biology* 1997;62:438-443.  
12  
13  
14 790 23. Vatassery G. Vitamin E and other endogenous antioxidants in the central nervous  
15  
16 791 system. *Geriatrics* 1998a;53:S25–S27.  
17  
18 792 24. Fukuzawa K, Gebicki JM. Oxidation of [alpha]-tocopherol in micelles and liposomes  
19  
20 793 by the hydroxyl, perhydroxyl, and superoxide free radicals. *Archives of Biochemistry*  
21  
22 794 and *Biophysics* 1983;226:242-251.  
23  
24  
25 795 25. Christen S, Woodall AA, Shigenaga MK, Southwell-Keely PT, Duncan MW, Ames  
26  
27 796 BN.  $\gamma$ -Tocopherol traps mutagenic electrophiles such as NO<sub>x</sub> and complements  $\alpha$ -  
28  
29 797 tocopherol: Physiological implications. *Proceedings of the National Academy of*  
30  
31 798 *Sciences of the United States of America* 1997;94:3217-3222.  
32  
33  
34 799 26. Brigelius-Flohé R, Kelly FJ, Salonen JT, Neuzil J, Zingg J-M, Azzi A. The European  
35  
36 800 perspective on vitamin E: current knowledge and future research. *The American*  
37  
38 801 *Journal of Clinical Nutrition* 2002;76:703-716.  
39  
40  
41 802 27. Calder P. Polyunsaturated fatty acids, inflammatory processes and inflammatory  
42  
43 803 bowel diseases *Mol Nutr Food Res* 2008;52:885–897  
44  
45 804 28. Edwards IJ, O'Flaherty JT. Omega-3 Fatty Acids and PPAR $\gamma$  in Cancer. *PPAR*  
46  
47 805 *Research* 2008;2008:1-15.  
48  
49  
50 806 29. Groeger AL, Cipollina C, Cole MP, et al. Cyclooxygenase-2 generates anti-  
51  
52 807 inflammatory mediators from omega-3 fatty acids. *Nat Chem Biol* 2010;6:433-441.  
53  
54  
55  
56  
57  
58  
59  
60

- 1  
2  
3 808 30. Dyall SC, Michael GJ, Michael-Titus AT. Omega-3 fatty acids reverse age-related  
4  
5 809 decreases in nuclear receptors and increase neurogenesis in old rats. *Journal of*  
6  
7 810 *Neuroscience Research* 2010;88:2091-2102.
- 8  
9  
10 811 31. McNamara RK. DHA Deficiency and Prefrontal Cortex Neuropathology in Recurrent  
11  
12 812 Affective Disorders. *The Journal of Nutrition* 2010;140:864-868.
- 13  
14 813 32. Salvati S, Natali F, Attorri L, et al. Eicosapentaenoic acid stimulates the expression of  
15  
16 814 myelin proteins in rat brain. *Journal of Neuroscience Research* 2008;86:776-784.
- 17  
18 815 33. Abraham M, Shapiro S, Karni A, Weiner HL, Miller A. Gelatinases (MMP-2 and  
19  
20 816 MMP-9) are preferentially expressed by Th1 vs. Th2 cells. *Journal of*  
21  
22 817 *Neuroimmunology* 2005;163:157-164.
- 23  
24  
25 818 34. C French-Constant. Pathogenesis of multiple sclerosis. *The Lancet* 1994;343:271-  
26  
27 819 275.
- 28  
29  
30 820 35. Leppert D, Lindberg RLP, Kappos L, Leib SL. Matrix metalloproteinases:  
31  
32 821 multifunctional effectors of inflammation in multiple sclerosis and bacterial  
33  
34 822 meningitis. *Brain Research Reviews* 2001;36:249-257.
- 35  
36 823 36. Curtis CL, Rees SG, Cramp J, et al. Effects of n-3 fatty acids on cartilage metabolism.  
37  
38 824 *Proceedings of the Nutrition Society* 2002;61:381-389.
- 39  
40  
41 825 37. Harris MA, Hansen RA, Vidsudhiphan P, et al. Effects of conjugated linoleic acids  
42  
43 826 and docosahexaenoic acid on rat liver and reproductive tissue fatty acids,  
44  
45 827 prostaglandins and matrix metalloproteinase production. *Prostaglandins, Leukotrienes*  
46  
47 828 *and Essential Fatty Acids* 2001;65:23-29.
- 48  
49  
50 829 38. McCabe A, Wallace J, Gilmore W, Strain J, McGlynn H. The effect of  
51  
52 830 eicosapentaenoic acid on matrix metalloproteinase gene expression. *Lipids*  
53  
54 831 1999;34:S217-S218.
- 55  
56  
57  
58  
59  
60

- 1  
2  
3 832 39. Shinto L, Marracci G, Bumgarner L, Yadav V. The Effects of Omega-3 Fatty Acids  
4  
5 833 on Matrix Metalloproteinase-9 Production and Cell Migration in Human Immune  
6  
7 834 Cells: Implications for Multiple Sclerosis. *Autoimmune Diseases* 2011;2011.  
8  
9  
10 835 40. Auffray C, Chen Z, Hood L. Systems medicine: the future of medical genomics and  
11  
12 836 healthcare. *Genome Med* 2009;1:2.  
13  
14 837 41. Huang WL, King VR, Curran OE, et al. A combination of intravenous and dietary  
15  
16 838 docosahexaenoic acid significantly improves outcome after spinal cord injury. *Brain*  
17  
18 839 2007;130:3004-3019.  
19  
20  
21 840 42. Marangoni F, Angeli MT, Colli S, et al. Changes of n – 3 and n – 6 fatty acids in  
22  
23 841 plasma and circulating cells of normal subjects, after prolonged administration of 20:5  
24  
25 842 (EPA) and 22:6 (DHA) ethyl esters and prolonged washout. *Biochimica et Biophysica*  
26  
27 843 *Acta (BBA) - Lipids and Lipid Metabolism* 1993;1210:55-62.  
28  
29  
30 844 43. Martínez M, Vázquez E, García-Silva MT, et al. Therapeutic effects of  
31  
32 845 docosahexaenoic acid ethyl ester in patients with generalized peroxisomal disorders1.  
33  
34 846 *The American Journal of Clinical Nutrition* 2000;71:376S-385S.  
35  
36  
37 847 44. Committee for medicinal products for human use. Guideline on clinical trials in small  
38  
39 848 populations In: European Medicines Agency, 2006: 1-10.  
40  
41 849 45. Gerard E Dallal. *The Little Handbook of Statistical Practice*. [online]. Available at  
42  
43 850 URL|. Accessed Date Accessed, Year|.  
44  
45 851 46. Wang YC, Meyerson L, Tang YQ, Qian N. Statistical methods for the analysis of  
46  
47 852 relapse data in MS clinical trials. *Journal of the Neurological Sciences* 2009;285:206-  
48  
49 853 211.  
50  
51  
52 854 47. Polman CH, O'Connor PW, Havrdova E, et al. A randomized, placebo-controlled trial  
53  
54 855 of natalizumab for relapsing multiple sclerosis. *The New England Journal of*  
55  
56 856 *Medicine* 2006;354:899-910.  
57  
58  
59  
60

- 1  
2  
3 857 48. Kappos L, Radue E-W, O'Connor P, et al. A Placebo-Controlled Trial of Oral  
4  
5 858 Fingolimod in Relapsing Multiple Sclerosis. *New England Journal of Medicine*  
6  
7 859 2010;362:387-401.  
8  
9  
10 860 49. Cunnane S, Ho S, Dore-Duffy P, Ells K, Horrobin D. Essential fatty acid and lipid  
11  
12 861 profiles in plasma and erythrocytes in patients with multiple sclerosis. *The American*  
13  
14 862 *Journal of Clinical Nutrition* 1989;50:801-806.  
15  
16 863 50. Harbige LS, Sharief MK. Polyunsaturated fatty acids in the pathogenesis and  
17  
18 864 treatment of multiple sclerosis. *British Journal of Nutrition* 2007;98:S46-S53.  
19  
20  
21 865 51. Wilson R, Tocher D. Lipid and fatty acid composition is altered in plaque tissue from  
22  
23 866 multiple sclerosis brain compared with normal brain white matter. *Lipids* 1991;26:9-  
24  
25 867 15.  
26  
27 868 52. Rafat AS, Saame RS, Laura AS, Heidi RY, William S, Gary PZ. Omega 3-Fatty  
28  
29 869 Acids: Health Benefits and Cellular Mechanisms of Action. *Mini Reviews in*  
30  
31 870 *Medicinal Chemistry* 2004;4:859-871.  
32  
33  
34 871 53. Shaikh SR, Edidin M. Polyunsaturated fatty acids, membrane organization, T cells,  
35  
36 872 and antigen presentation. *The American Journal of Clinical Nutrition* 2006;84:1277-  
37  
38 873 1289.  
39  
40  
41 874 54. Lajtha A, Toth J, Fujimoto K, Agrawal CH. Turnover of Myelin Proteins in Mouse  
42  
43 875 Brain in vivo. *Biochem J* 1977;164:323-329.  
44  
45 876 55. LeBaron FN, Sanyal S, Jungalwala FB. Turnover rate of molecular species of  
46  
47 877 sphingomyelin in rat brain. *Neurochemical Research* 1981;6:1081-1089.  
48  
49 878 56. Yao JK. Increased polyunsaturated fatty acids in developing and regenerating  
50  
51 879 peripheral nerve. *Biochimica et Biophysica Acta (BBA) - Lipids and Lipid*  
52  
53 880 *Metabolism* 1982;712:542-546.  
54  
55  
56  
57  
58  
59  
60

1  
2  
3 881 57. Riccio P. The molecular basis of nutritional intervention in multiple sclerosis: a  
4  
5 882 narrative review. *Complement Ther Med* 2011;19:228-237.  
6  
7

8 883  
9

10 884  
11  
12

### 13 885 **Figure legends**

14  
15  
16  
17 886 **Figure 1.** Omega-6 and omega-3 PUFA, their respective metabolic derivatives and their  
18 possible effects on inflammation.  
19

20 887  
21  
22 888 After consumption, the PUFAs are metabolized via several pathways (not shown) to active  
23  
24 889 compounds that mediate inflammation and products that promote resolution of inflammation.  
25  
26

27  
28 890 Abbreviations: PL, phospholipid; IFN- $\gamma$ , interferon  $\gamma$ ; IL-2, interleukin 2; NF $\kappa$ B, nuclear  
29 factor kappa B; PGE<sub>2</sub>, prostaglandin E<sub>2</sub>; PPAR $\gamma$ , peroxisome proliferator-activated receptor  
30  $\gamma$ ; PUFAs, polyunsaturated fatty acids; TGF $\beta$ , transforming growth factor  $\beta$ ; TNF, tumor  
31 necrosis factor; COX, cyclooxygenase; hydroxyeicosatetraenoic acid; HPETE,  
32 hydroperoxyeicosatetraenoic acid; LOX, lipoxygenase; LT, leukotriene; PG, prostaglandin;  
33 TX, thromboxane; RXR- $\gamma$ , retinoid X receptor-gamma; Nrf2, nuclear respiratory factor;  
34  
35 893 MMP, metalloproteinase.  
36  
37

38 894  
39  
40 895  
41  
42 896 **Figure 2.** Study Flowchart  
43  
44

45  
46  
47 897  
48 898 **Figure 3.** Panel A demonstrates the ARR of all-time on-study patients during the 24mo pre-  
49 treatment (baseline ARR) and at different on-study intervals (6, 12, 18, 24 mo) per treatment  
50 arm. \*\*  
51  
52 900

53  
54  
55 901 Panel B demonstrates the ARR of all-time on-study population between 0-6, 6-12, 6-18, and  
56 6-24 mo period intervals, of PLP10 vs. placebo group. \*\*  
57  
58 902  
59  
60

1  
2  
3 903 Panel C demonstrates the ARR of all-time on-study population of PLP10 vs. placebo group at  
4  
5 904 baseline, during 1<sup>st</sup> year, and during the 2-year on-treatment. \*\*  
6  
7

8 905 Panel D demonstrates the dispersion of relapses throughout the 2-year period of all-time on-  
9  
10 906 study (excluding patients on natalizumab) of PLP10 (n=10) vs. placebo (n=10). Placebo  
11  
12 907 shows an irregular dispersion of relapses in relation to PLP10 group with linear increasing  
13  
14 908 trend while PLP10 shows a stabilized linear trend. By using the per-protocol model where  
15  
16 909 patients on natalizumab were excluded, we could compare the number of relapses on a same  
17  
18 910 number of patients.  
19  
20  
21

22 911 \*\* Including the patients on natalizumab.  
23  
24

25 912 **Figure 4.** Panel 4A demonstrates the Kaplan–Meier plot of the time to sustained progression  
26  
27 913 of disability among all-time on-study patients, excluding patients on natalizumab, receiving  
28  
29 914 intervention A, PLP10 and C as compared with placebo. PLP10 reduced the risk of sustained  
30  
31 915 progression of disability by 86% over two years (p=0.006). Intervention formula A reduced  
32  
33 916 the risk of sustained progression of disability by 53% (p=0.266) and intervention formula C  
34  
35 917 by 67% (p=0.061).  
36  
37  
38

39 918 Panel 4B demonstrates the Kaplan–Meier plot of the time to sustained progression of  
40  
41 919 disability among ITT population receiving intervention A, PLP10 and C as compared with  
42  
43 920 placebo. PLP10 reduced the risk of sustained progression of disability by 71% over two years  
44  
45 921 (p=0.052, trend). Intervention formula A reduced the risk of sustained progression of  
46  
47 922 disability by 22% (p=0.727) and intervention formula C by 40% (p=0.447).  
48  
49  
50

51 923 **Figure 5.** Mean change in expanded disability status scale score as a function of visit  
52  
53 924 number. Values are expressed as mean ± s.e.m.  
54  
55

56 925 ¶ Including patients on natalizumab  
57  
58  
59  
60

1  
2  
3 926 ¶¶ Excluding patients on natalizumab  
4  
5  
6 927  
7  
8  
9  
10  
11  
12  
13  
14  
15  
16  
17  
18  
19  
20  
21  
22  
23  
24  
25  
26  
27  
28  
29  
30  
31  
32  
33  
34  
35  
36  
37  
38  
39  
40  
41  
42  
43  
44  
45  
46  
47  
48  
49  
50  
51  
52  
53  
54  
55  
56  
57  
58  
59  
60

For peer review only

## Omega-6 and omega-3 PUFA Consumption through Diet

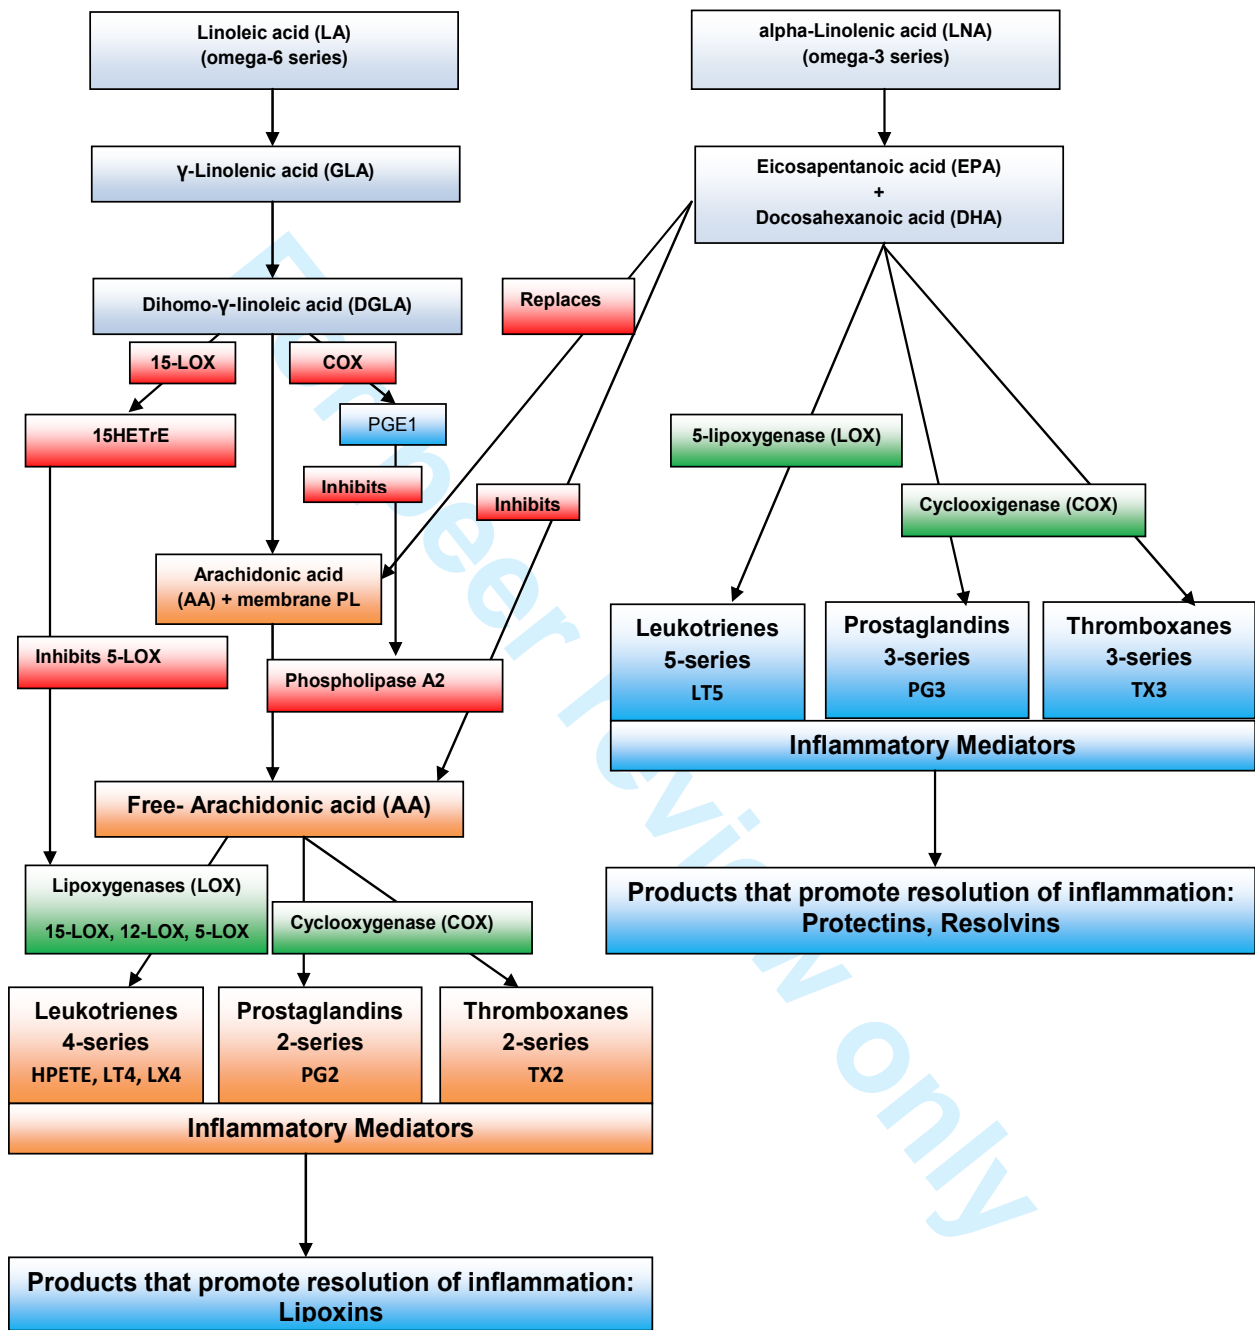

**Possible effects on inflammation:**  
 Reduce IFN- $\gamma$  production; Reduce IL-2 production; Increase TGF $\beta$  activity; Increase PGE2 activity; Inhibit arachidonic acid; Reduce TNF levels; RXR- $\gamma$  and PPAR $\gamma$  agonist; NF $\kappa$ B expression; stimulate Nrf2; reduce MMP-2, -3, -9, and -13



1  
2  
3  
4  
5  
6  
7  
8  
9  
10  
11  
12  
13  
14  
15  
16  
17  
18  
19  
20  
21  
22  
23  
24  
25  
26  
27  
28  
29  
30  
31  
32  
33  
34  
35  
36  
37  
38  
39  
40  
41  
42  
43  
44  
45  
46  
47  
48  
49  
50  
51  
52  
53  
54  
55  
56  
57  
58  
59  
60

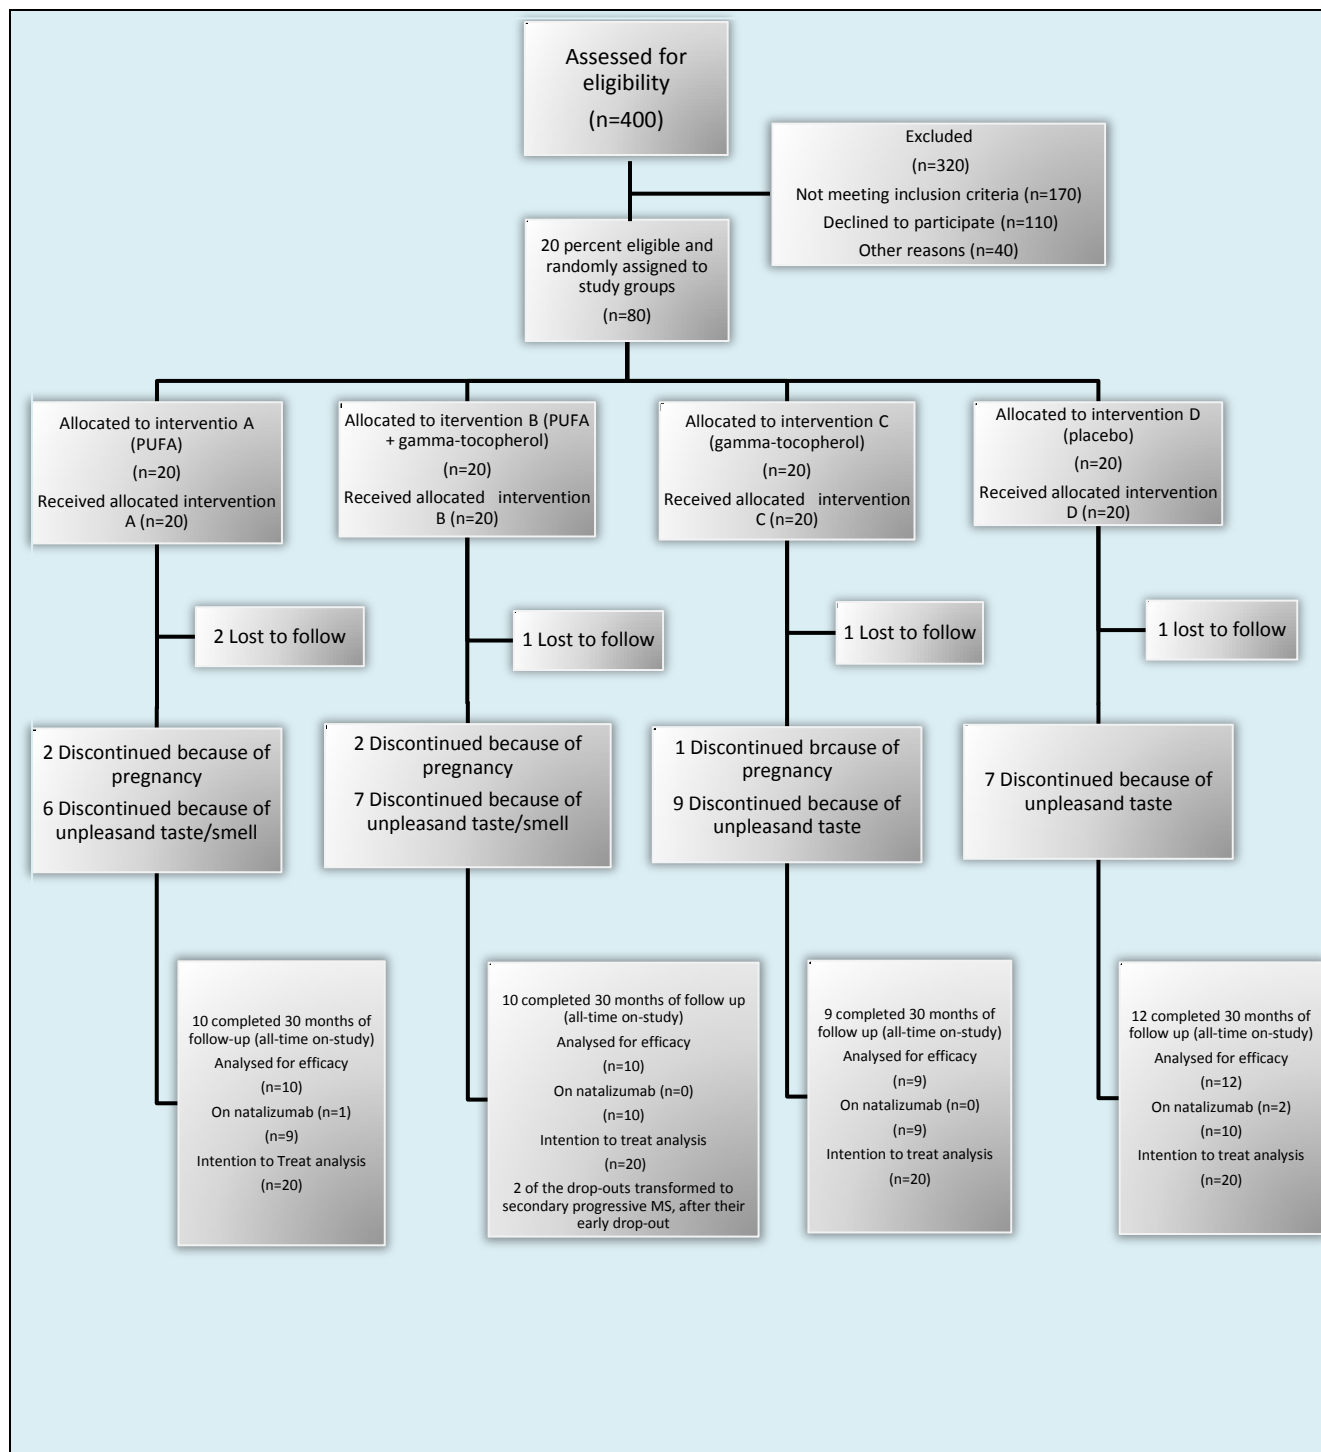

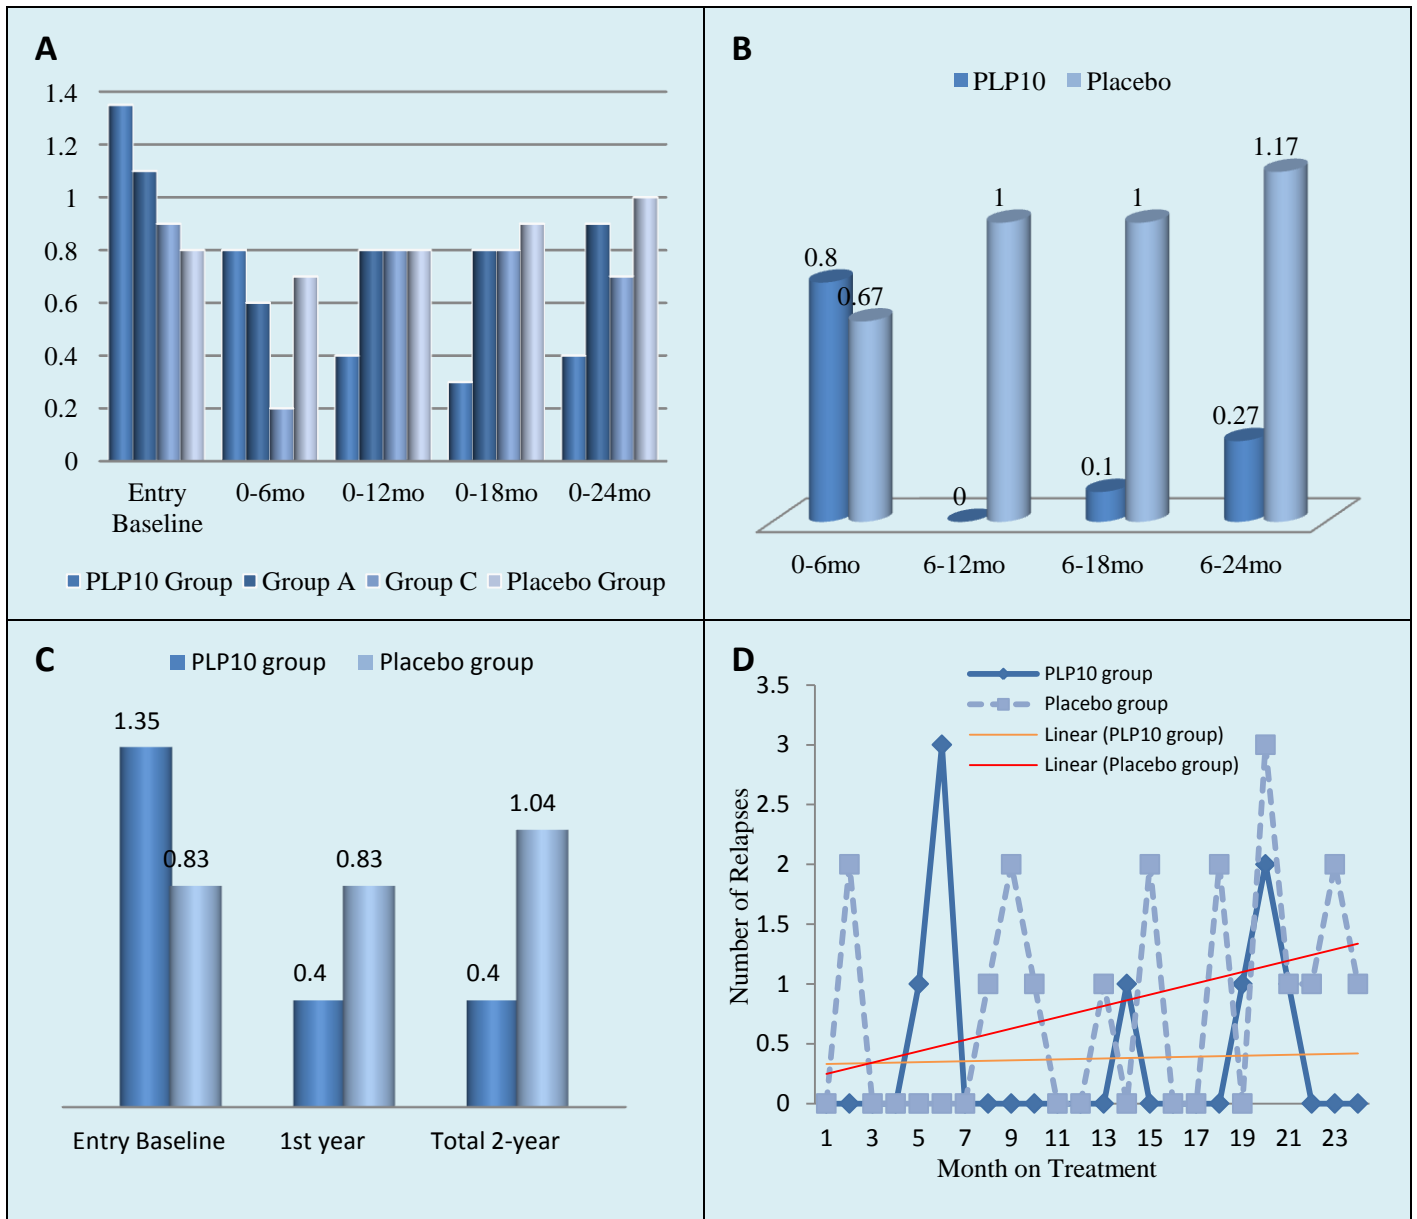

Only

1  
2  
3  
4  
5  
6  
7  
8  
9  
10  
11  
12  
13  
14  
15  
16  
17  
18  
19  
20  
21  
22  
23  
24  
25  
26  
27  
28  
29  
30  
31  
32  
33  
34  
35  
36  
37  
38  
39  
40  
41  
42  
43  
44  
45  
46  
47  
48  
49  
50  
51  
52  
53  
54  
55  
56  
57  
58  
59  
60

3a

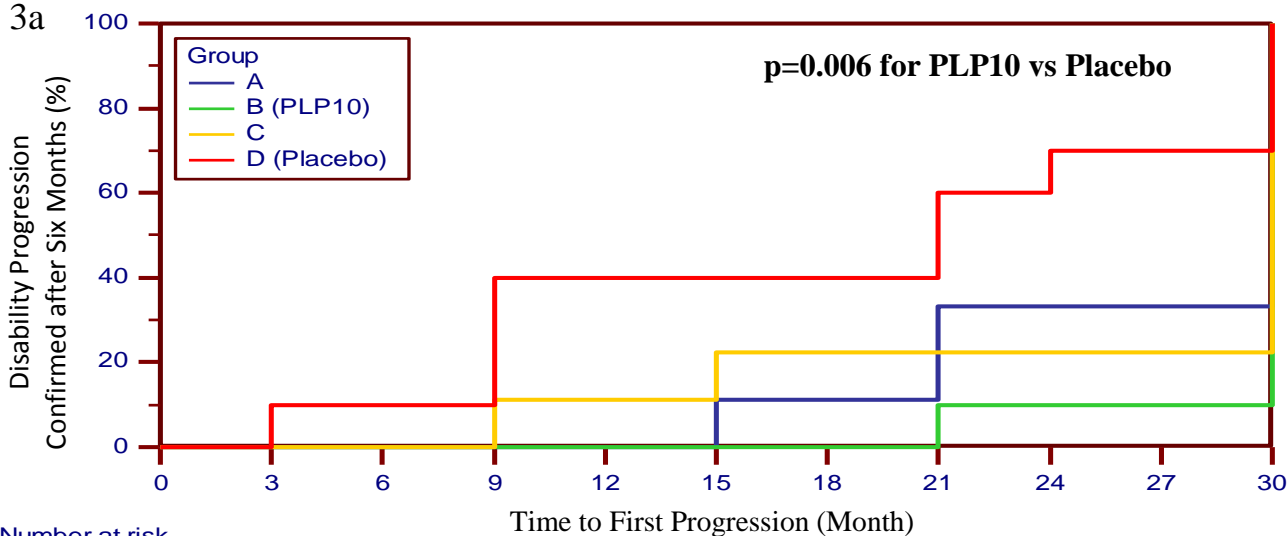

Number at risk

|                    |    |    |    |    |    |    |   |   |   |   |
|--------------------|----|----|----|----|----|----|---|---|---|---|
| Group: A           | 9  | 9  | 9  | 9  | 8  | 8  | 6 | 6 | 6 | 6 |
| Group: B (PLP10)   | 10 | 10 | 10 | 10 | 10 | 10 | 9 | 9 | 9 | 9 |
| Group: C           | 9  | 9  | 9  | 8  | 8  | 7  | 7 | 7 | 7 | 7 |
| Group: D (Placebo) | 10 | 9  | 9  | 6  | 6  | 6  | 4 | 3 | 3 | 3 |

3b

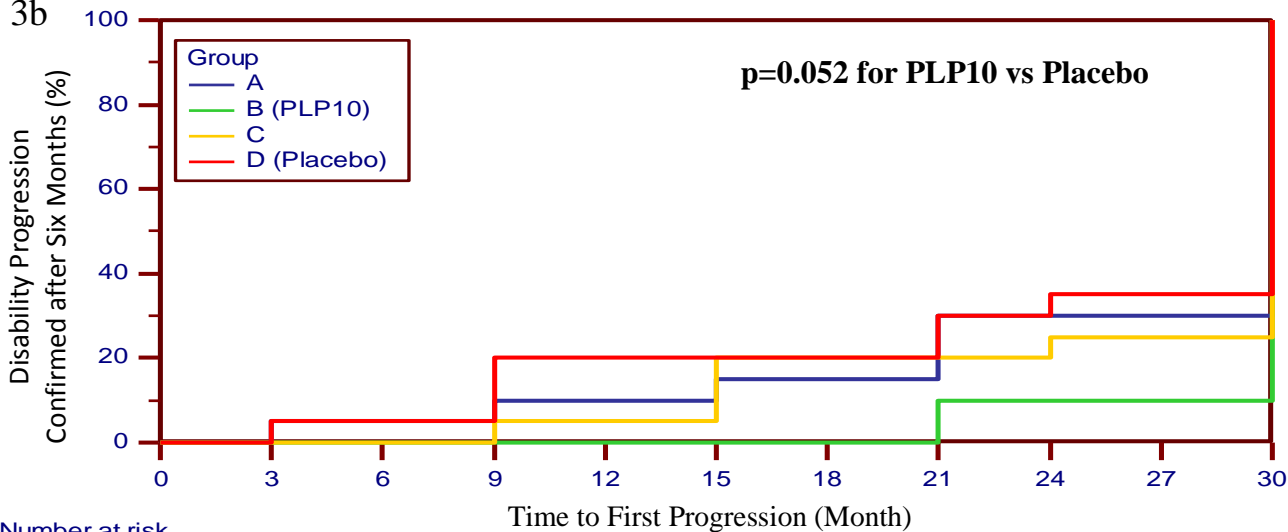

Number at risk

|                    |    |    |    |    |    |    |    |    |    |    |    |
|--------------------|----|----|----|----|----|----|----|----|----|----|----|
| Group: A           | 20 | 19 | 19 | 18 | 18 | 17 | 17 | 14 | 14 | 14 | 14 |
| Group: B (PLP10)   | 20 | 20 | 20 | 20 | 20 | 20 | 20 | 18 | 18 | 18 | 18 |
| Group: C           | 20 | 20 | 20 | 19 | 19 | 16 | 16 | 16 | 15 | 15 | 15 |
| Group: D (Placebo) | 20 | 19 | 19 | 16 | 16 | 16 | 16 | 14 | 13 | 13 | 13 |

1  
2  
3  
4  
5  
6  
7  
8  
9  
10  
11  
12  
13  
14  
15  
16  
17  
18  
19  
20  
21  
22  
23  
24  
25  
26  
27  
28  
29  
30  
31  
32  
33  
34  
35  
36  
37  
38  
39  
40  
41  
42  
43  
44  
45  
46  
47  
48  
49  
50  
51  
52  
53  
54  
55  
56  
57  
58  
59  
60

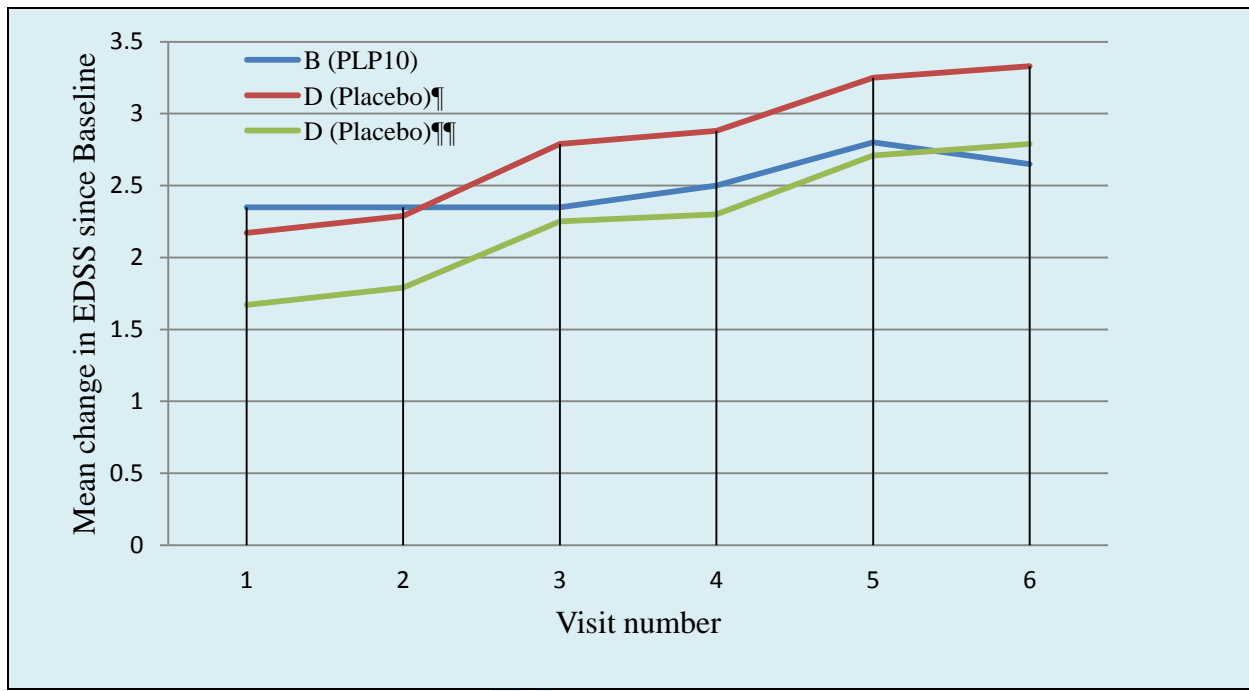

er review only

1 **Supplementary Information**

## 2 Table of Content

3

| Supplementary Section               | Page |
|-------------------------------------|------|
| Supplementary Information Methods 1 | 2-4  |
| Supplementary Information Methods 2 | 5-6  |
| Supplementary Information Figure 1  | 7    |
| Supplementary Information Figure 2  | 8    |

4

5

6

7

8

9

10

11

12

13

14

15

16

17

18

19

20

21

22

23

24

25

26

27

28

29

30

31

32

33

### 34 **Supplementary Information Methods 1**

35 **Intervention and study rational.** We are using high dosage of 1:1 omega-3:omega-6  
36 polyunsaturated (PUFA) aiming to overpass and normalize global diet regional traditions and  
37 habits in relation to abnormal PUFA/saturated fatty acids (SFA)/monounsaturated fatty acids  
38 (MUFA) daily ratio consumption irrespective of the quantities consumed; and enough to  
39 equilibrate patients' diet in line with the recommended more physiologic omega-3:omega-6  
40 ratio of about 1:1-4 wt/wt as reported by Simopoulos, 2002. In addition to correct existing  
41 deficiencies, cell membrane abnormalities, specifically of the immunopathological system  
42 and blood mononuclear peripheral cells, and high enough for availability and immediate  
43 ongoing modulation of the involved pathogenic mechanisms and network of events in MS.  
44 The high dosage is also required to overpass the quantity limitations, previously discussed, of  
45 diet-consumed PUFAs for cellular incorporation, especially in the central nervous system  
46 (CNS) of adults. Additionally, fatty acids (FAs) must first cross the intestinal epithelium  
47 before reaching the different tissues, where digestion and absorption constitute further  
48 problems in their availability (Carlier, H, 1991). Omega-3 PUFA are used in re-esterified  
49 form to eliminate unwanted disturbances, at the sides of action, by other fatty acids and  
50 molecules present in crude fish oils but also to increase the bioavailability of the FA since  
51 triglycerides have been shown to be associated with much higher bioavailability (Dyerberg et  
52 al, 2010). Linoleic (LA) and gamma linolenic acid (GLA) are essential structure molecules  
53 and important for any physiological (re)generation of cell membrane. GLA quantity is  
54 doubled to LA to ensure high direct production of dihomo-gamma-linolenic acid (DGLA),  
55 from GLA when LA cannot be metabolized, due to desaturase deficiency or malfunction.  
56 Such a reduced capacity to convert LA to GLA has been associated with aging, diabetes,  
57 alcoholism, atopic dermatitis, premenstrual syndrome, rheumatoid arthritis, cancer and  
58 cardiovascular diseases (Bolton-Smith et al, 1997; Horrobin, 1990; Leventhal et al, 1993).  
59 This is going to result in the increase of DGLA relative to arachidonic acid (AA) with DGLA  
60 promoting production of prostaglandin (PG)E1 but also inhibition of phospholipase (PL)A2:  
61 two major reasons and rational for their use. If other metabolic problems are involved within  
62 the omega-6 series and the normal metabolites are not produced then the eicosapentaenoic  
63 acid EPA available in PLP10 will substitute the function of DGLA, as a competitive inhibitor  
64 of AA for PLA2. In both cases the pro-inflammatory leucotrienes, prostaglandines of the 2-  
65 series (PG2) and thromboxanes of the 2 series including the platelet-activator factor (PAF)  
66 will be attenuated. The synthesis of AA from DGLA by  $\Delta 5$  desaturase promoted by LA/GLA  
67 supplementation is very limited in humans as a result of limited activity of the enzyme  
68 (Yang-Yi & Robert, 1998). AA in the body is mostly available through diet. EPA and  
69 docosahexaenoic acid (DHA) are both physiologically important and crucial structured  
70 molecules able to substitute excess AA and SFA within the cell membranes. EPA will  
71 contribute to the inhibition (competitive to AA) of PLA2, joining the co-supplied omega-6  
72 PUFA but will also participate in the production of anti-inflammatory leukotrienes,  
73 prostaglandins of the 3-series (PG3) and thromboxane (TX3) along with DHA, both found in  
74 the PLP10 intervention. Moreover EPA will replace AA of the membrane phospholipids and  
75 both omega-3 PUFA will contribute replacing abnormal quantities of SFA and excess AA.  
76 DHA is used in 3:1 ratio to EPA to cover any possible inabilities of EPA to be metabolized,  
77 high enough to strongly promote high production of the aforementioned anti-inflammatory

1  
2  
3 78 eicosanoids and cytokines and to be incorporated into CNS cell membranes where DHA  
4 79 should be the major PUFA present, replacing other FA, probably saturated and excess of AA.  
5 80 EPA, DHA, LA and GLA along with the rest of the other ingredients used (“other” omega-3  
6 81 PUFA, SFA and MUFA that are usually found in the cell membranes of healthy people in  
7 82 limited quantities) in the intervention regimen are for their availability as minor structural  
8 83 constituents of physiological cellular membranes integrity, fluidity and overall function as  
9 84 building blocks for myelin repair and/or myelination. Furthermore the PUFA used within the  
10 85 cocktail intervention aimed to manipulate all other pathophysiological pathways that are  
11 86 reported to be able to: as previously discussed including gene transcription for  
12 87 neuroprotection and remyelination. Furthermore, PUFA are used to ensure the integrity of  
13 88 blood brain barrier (BBB) and to modulate the gelatinases responsible for the T cell migration  
14 89 within the CNS. Three different antioxidant vitamins (vitamin E, mostly as alpha-tocopherol,  
15 90 gamma ( $\gamma$ )-tocopherol (vitamin E isoform) and vitamin A) are used in the regimen  
16 91 preparation to support the cellular antioxidant defenses but also to protect peroxidation of the  
17 92 supplied increased amounts of PUFA. Alpha-tocopherol low-molecular-weight antioxidants  
18 93 will contribute to radical scavenging, interfering with gene transcription, protein expression,  
19 94 enzyme activity and metal chelation (van Meeteren et al, 2005). Vitamin E (alpha tocopherol)  
20 95 and vitamin A are used as antioxidants for the protection of the excess supplemented PUFA,  
21 96 with alpha-tocopherol been demonstrated to protect against peroxynitrite-induced oxidative  
22 97 damage, as well as able to efficiently detoxify hydroxyl, perhydroxyl and superoxide free  
23 98 radicals (the elevated reactive oxygen species (ROS)); each one with different mechanism of  
24 99 action, increasing the effect capability (Vatassery et al, 1998b; van Meeteren, 2005). Gamma-  
25 100 tocopherol is used in high dosage since its half life is very short compared to alpha-  
26 101 tocopherol and has been demonstrated to specifically protect against nitro-radicals.  
27 102 Tocopherols can also exert non-antioxidant properties, including modulation of cell signaling  
28 103 and immune function, regulation of transcription, and induction of apoptosis as previously  
29 104 discussed (van Meeteren et al, 2005).

30  
31  
32  
33  
34  
35  
36  
37  
38  
39 105 PLP10 is the first preparation ever developed for MS therapy that is composed by the use of  
40 106 all different previously discussed PUFA, MUFA, SFA in a cocktail preparation mixed with  
41 107 the specific aforementioned antioxidant vitamins that have never been all together used  
42 108 before within a specific formulation. The ingredients ratio, quality, structural form and  
43 109 mostly the high dosage has never been before tested. Furthermore, the knowledge and  
44 110 chronotherapy as well as other unique limitations associated with the individual molecules  
45 111 used, have never been accounted, discussed, proposed or reported for any previous  
46 112 therapeutic regimen.

47  
48  
49  
50 113 Through systems medicine therapeutic philosophy, by the use of PLP10, potentially MS  
51 114 patients have the opportunity to be treated holistically, by natural source isolated molecules,  
52 115 demonstrated as able of affecting and modulating all known pathophysiological,  
53 116 immunopathological, habitual, gene related factors; thus the dynamic interconnected complex  
54 117 network of events simultaneously. Possibly synergistic effects between PLP10 ingredients are  
55 118 also feasible. Moreover we can speculate that treatment efficacy of PLP10, when used as

- 1  
2  
3 119 adjunct to existing pharmaceuticals produced by reductionism, can be proven therapeutically  
4 120 superior to any available treatment for MS.  
5  
6 121  
7  
8 122 Bolton-Smith C, Woodward M, Tavendale R (1997) Evidence for age-related differences in  
9 123 the fatty acid composition of human adipose tissue, independent of diet. *European Journal of*  
10 124 *Clinical Nutrition* **51**: 619-624  
11  
12 125  
13 126 Carlier H, Bernard A, Caselli C (1991) Digestion and absorption of polyunsaturated fatty  
14 127 acids. *Reproduction, nutrition, development* **31**: 475-500  
15  
16 128  
17 129 Dyerberg J, Madsen P, Møller JM, Aardestrup I, Schmidt EB (2010) Bioavailability of  
18 130 marine n-3 fatty acid formulations. *Prostaglandins, leukotrienes, and essential fatty acids* **83**:  
19 131 137-141  
20  
21 132  
22 133 Horrobin DF (1990) Gamma-linolenic acid. *Rev Contemp Physiol* **1**: 1-41  
23  
24 134  
25 135 Leventhal LJ, Boyce EG, Zurier RB (1993) Treatment of rheumatoid arthritis with  
26 136 gammalinolenic acid. *Annals of Internal Medicine* **119**: 867-873  
27  
28 137  
29 138 Simopoulos AP (2002) The importance of the ratio of omega-6/omega-3 essential fatty acids.  
30 139 *Biomedicine & Pharmacotherapy* **56**: 365-379  
31  
32 140  
33 141 van Meeteren ME, Teunissen CE, Dijkstra CD, van Tol EAF (2005) Antioxidants and  
34 142 polyunsaturated fatty acids in multiple sclerosis. *Eur J Clin Nutr* **59**: 1347-1361  
35  
36 143  
37 144 Yang-Yi F, Robert SC (1998) Importance of Dietary g-Linolenic acid in human health and  
38 145 nutrition. *The Journal of Nutrition* **128**: 1411-1414  
39  
40 146  
41 147 Vatassery GT, Smith WE, Quach HT (1998b) Alpha-tocopherol in rat brain subcellular  
42 148 fractions is oxidized rapidly during incubations with low concentrations of peroxynitrite.  
43 149 *Journal of Nutrition* **128**:152–157.  
44  
45 150  
46 151  
47 152  
48 153  
49 154  
50 155  
51 156  
52 157  
53 158  
54 159  
55  
56  
57  
58  
59  
60



## 160 **Supplementary Information Methods 2**

161 **Interventions specifications.** The specific omega-3 (re-esterified glycerides) and omega-6  
162 (glycerides) raw materials were purchased according to the required interventions' PUFA-  
163 fraction specification (molecular structure, quantity/ratio and quality) with vitamin E (alpha-  
164 tocopherol) used as antioxidant stabilizer by the supplier. The vitamins and masking aroma  
165 were purchased separately. The mixing of fractions to the final required intervention-  
166 composition specification was always performed by the same team of scientists under the  
167 supervision of the involved medical biochemist and lipidology specialist, under appropriate  
168 conditions every six months. Interventions were stored refrigerated in dark until use.

169  
170 The ratios of the different ingredients used were as follows: omega-3, EPA to DHA (about 1  
171 to 3 wt/wt), omega-6, LA to GLA (about 2 to 1 wt/wt), omega-3 (EPA + DHA) to omega-6  
172 (LA + GLA) (about 1 to 1 wt/wt). The total omega-3 (EPA + DHA + "other" omega-3  
173 PUFA) used as re-esterified triglycerol (minimum value 60%), diglyceride (about 33%),  
174 monoglyceride (about 2%) structural form mixture and about 2% ethyl ester structural form,  
175 with no less than 80% re-esterified triglycerol content to be DHA and EPA as a result of  
176 PUFA triglycerides re-esterification of fish body oils. The "other" group of omega-3 on the  
177 re-esterified glycerols included the 18:3 (alpha-linolenic acid), 18:4 (stearidonic acid), 20:4  
178 (eicosatetraenoic acid) and 22:5 (docosapentaenoic acid) PUFA. The fraction of omega-6  
179 (LA + GLA) used as triglycerides with no less than 50-65% triglycerol content to be LA and  
180 GLA in a ratio of 2 to 1 with 18:1 (oleic acid) 14-20% and 20:1 (eicosenoic acid), 22:1  
181 (docosenoic acid), 24:1 (tetracosenic acid) as additional monounsaturated fatty acids and  
182 minor quantities of 16:0 (palmitic acid) 4-16%, 18:0 (stearic acid) 2-5% saturated fatty acids  
183 from Borage oil source. The vitamins used were vitamin A as beta-carotene, vitamin E  
184 (alpha-tocopherol) and pure gamma-tocopherol (vitamine E isoform). Citrus extract was used  
185 as masking aroma and pure virgin olive oil as delivery vehicle.

186  
187 **The daily intervention formula agent dosages were:**

188 **Intervention formula A** daily dosage: EPA (1650mg) / DHA (4650mg) / GLA (2000mg) /  
189 LA (3850mg) / total other omega-3 (600mg) / total monounsaturated fatty acids (MUFA)  
190 (18:1 1300mg, 20:1 250mg, 22:1 82mg, 24:1 82mg) + total saturated fatty acids (SFA) (18:0  
191 160mg, 16:0 650mg) / vitamin A (0.6mg) / vitamin E (22mg).

192 **Intervention formula B (PLP10)** daily dosage: EPA (1650mg) / DHA (4650mg) / GLA  
193 (2000mg) / LA (3850mg) / total other omega-3 (600mg) / total MUFA (18:1 1300mg, 20:1  
194 250mg, 22:1 82mg, 24:1 82mg) + total SFA (18:0 160mg, 16:0 650mg) / vitamin A (0.6mg) /  
195 vitamin E (22mg) / gamma- tocopherol ( $\gamma$ -tocopherol) (760 mg).

196 **Intervention formula C** daily dosage:  $\gamma$ -tocopherol (760 mg) (in 16137 mg pure virgin olive  
197 oil as a vehicle).

198 **Intervention formula D** daily dosage: pure virgin olive oil (16930mg).

199 Citrus aroma was added in each intervention formula to make up a total dosage of 19.5ml of  
200 solution per day.

1  
2  
3 201 The specific omega-3 related fraction, according to specifications required for the  
4 202 interventions was prepared and purchased from EPAX AS, Aalesund, Norway; as re-  
5 203 esterified glycerides from fish body oils as a source. The specific omega-6 PUFA, MUFA  
6 204 and SFA related fraction, according to required specifications, was prepared and purchased  
7 205 from Goerlich Pharma International GmbH, Edling, Germany, as triglycerides from Borage  
8 206 seed oil (organic, cold pressed) "*Borago officinalis*" as a source. Both omega-3 and omega-6  
9 207 fractions were delivered stabilized by the producer (vitamine E (alpha-tocopherol) ~ 4.5 mg/g  
10 208 was used as antioxidant).

11  
12  
13  
14 209 Vitamins: vitamin A as beta-carotene (HealthAid Ltd., Middlesex, United Kingdom) and pure  
15 210 gamma-tocopherol (Tama Biochemical Co. Ltd., Shinjuku-ku Tokyo, Japan).

16  
17  
18 211 Citrus aroma (Givaudan Schwaiz AG, Dubendorf, Switzerland).

19  
20  
21 212

22  
23  
24 213

25  
26  
27 214

28  
29  
30  
31 215

32  
33  
34 216

35  
36  
37 217

38  
39  
40  
41 218

42  
43  
44 219

45  
46  
47 220

48  
49  
50  
51 221

52  
53  
54 222

55  
56  
57 223

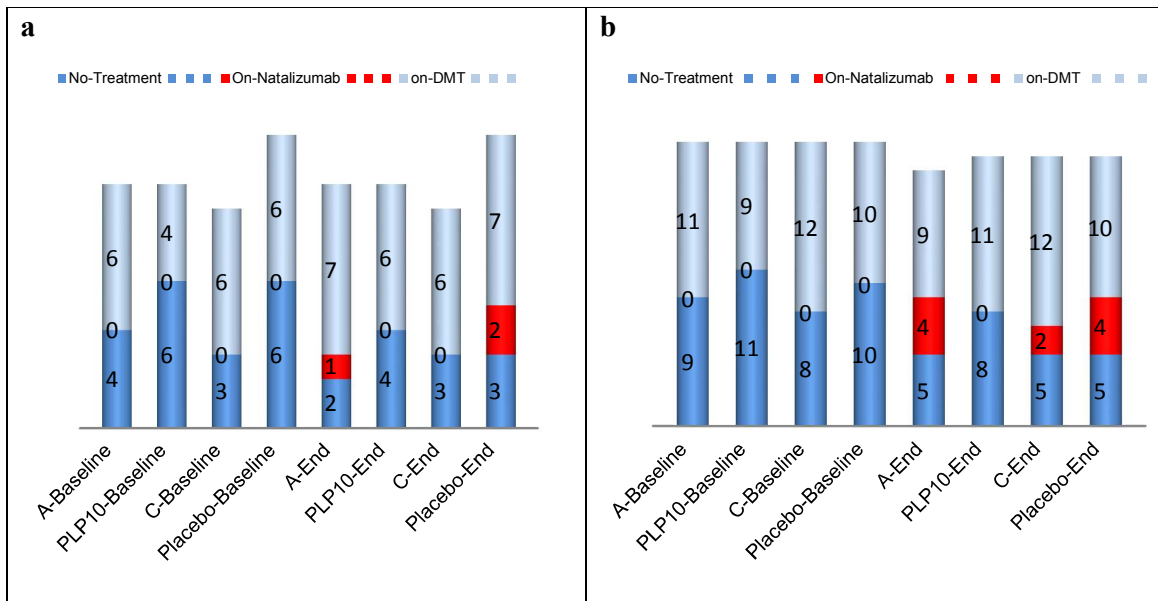

**Supplementary Information Figure 1 | Population on DMT and/or natalizumab.** (a) Demonstrates the all-time on-study population per treatment arm that was receiving or not receiving DMT at entry baseline and the same population at the end of the trial (including patients on natalizumab). No statistical significant differences were calculated. The all-time on-study patients per treatment-arm that were receiving DMT at entry baseline were six patients out of ten (60%) within group A, four out of ten (40%) within PLP10 group, six out of nine (66%) within group C and six out of 12 (50%) within placebo. When the study completed, 80% of the patients in group A, 60% in PLP10 group, 66% in group C and 75% of the patients in placebo ended up on treatment. Within group A one out of eight and within placebo two out of nine patients on DMT transferred on natalizumab. (b) Demonstrates the total randomized population per treatment arm that was receiving or not receiving DMT at entry baseline and the same population at the end of the trial without lost to follow-up (including patients on natalizumab). A total of 61% of group A patients were on DMT at entry baseline and became 72% at the end; for PLP10 group 41% and became 53%; for group C 73% and became 74% and for placebo 53% and became 74% at study completion. At the end: for group A, four out of 13 patients on DMT transferred on natalizumab; for PLP10 group no patient was on natalizumab; for Group C two out of 14 patients on DMT transferred on natalizumab; and for placebo group four out of the 14 patients on DMT transferred on natalizumab. No significant differences measured at entry baseline between the groups.

224

225

226

227

1  
2  
3  
4  
5  
6  
7  
8  
9  
10  
11  
12  
13  
14  
15  
16  
17  
18  
19  
20  
21  
22  
23  
24  
25  
26  
27  
28  
29  
30  
31  
32  
33  
34  
35  
36  
37  
38  
39  
40  
41  
42  
43  
44  
45  
46  
47  
48  
49  
50  
51  
52  
53  
54  
55  
56  
57  
58  
59  
60

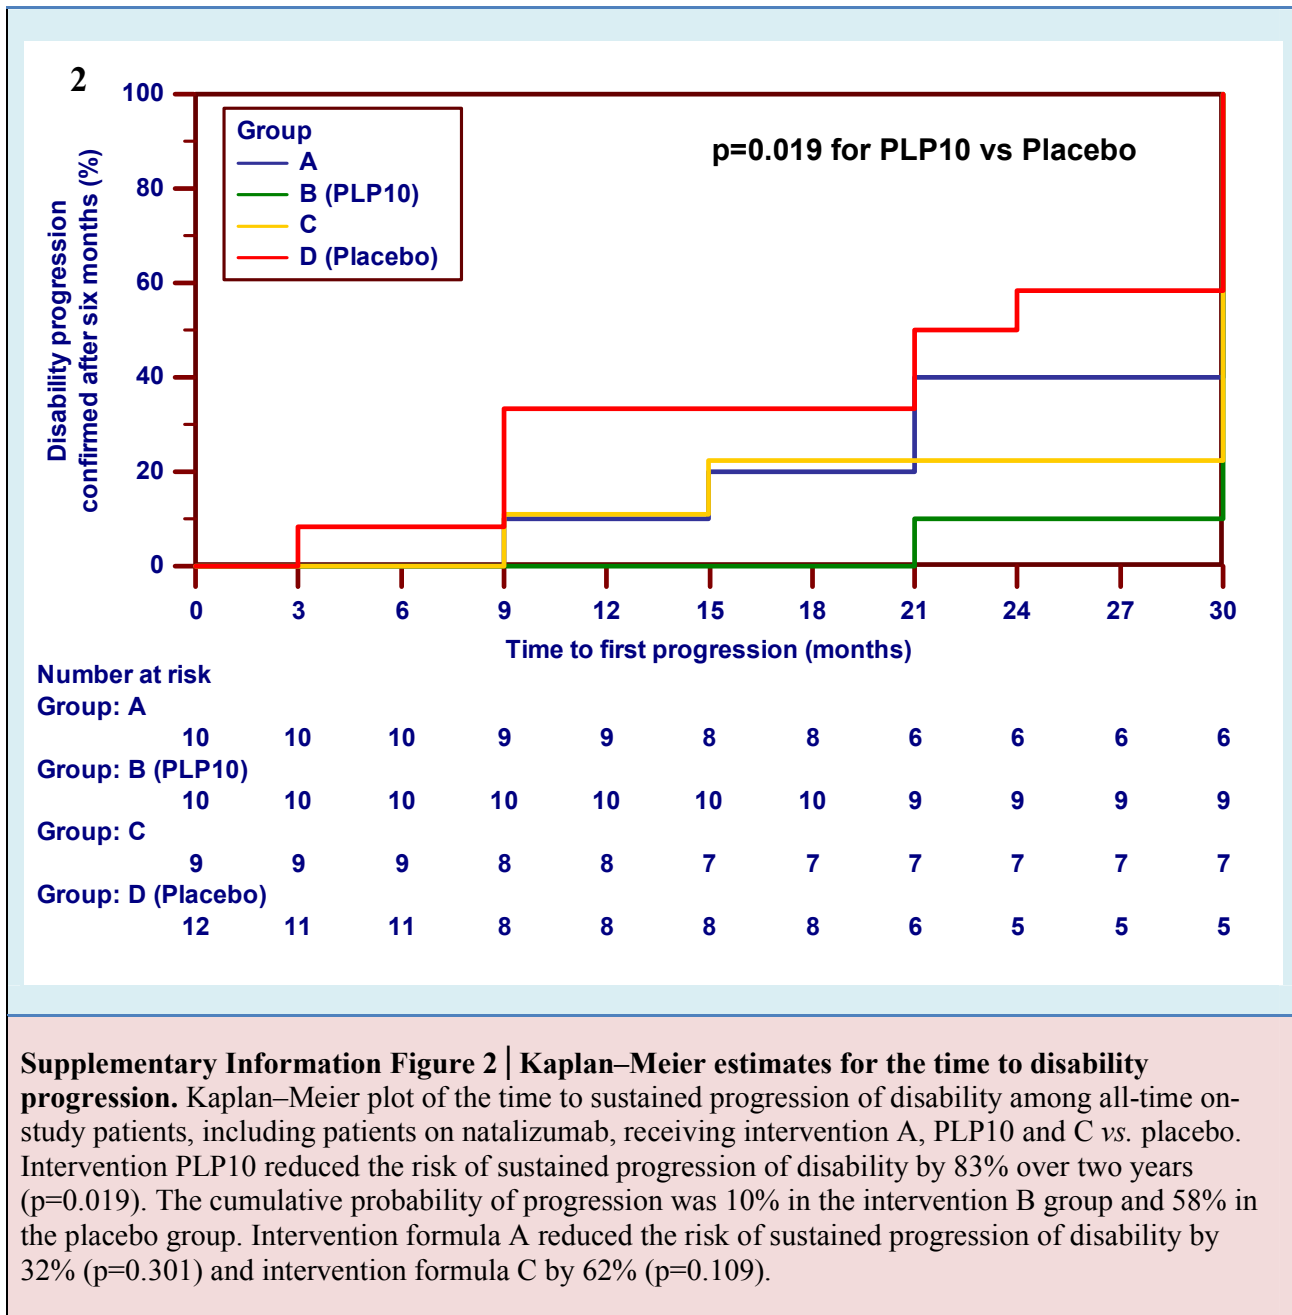

228

229

### Checklist of Items for Reporting Trials of Nonpharmacologic Treatments\*

| Section                    | Item | Standard CONSORT Description                                                                                                                                                              | Extension for Nonpharmacologic Trials                                                                                                                                       | Reported on Page No.    |
|----------------------------|------|-------------------------------------------------------------------------------------------------------------------------------------------------------------------------------------------|-----------------------------------------------------------------------------------------------------------------------------------------------------------------------------|-------------------------|
| <b>Title and abstract†</b> | 1    | How participants were allocated to interventions (e.g., “random allocation,” “randomized,” or “randomly assigned”)                                                                        | In the abstract, description of the experimental treatment, comparator, care providers, centers, and blinding status                                                        | 1,3,4                   |
| <b>Introduction</b>        |      |                                                                                                                                                                                           |                                                                                                                                                                             |                         |
| Background                 | 2    | Scientific background and explanation of rationale                                                                                                                                        |                                                                                                                                                                             | 5 to 8                  |
| <b>Methods</b>             |      |                                                                                                                                                                                           |                                                                                                                                                                             |                         |
| Participants†              | 3    | Eligibility criteria for participants and the settings and locations where the data were collected                                                                                        | When applicable, eligibility criteria for centers and those performing the interventions                                                                                    | 8, 13,15                |
| Interventions†             | 4    | Precise details of the interventions intended for each group and how and when they were actually administered                                                                             | Precise details of both the experimental treatment and comparator                                                                                                           | 9,10,11 Appendix p. 5,6 |
|                            | 4A   |                                                                                                                                                                                           | Description of the different components of the interventions and, when applicable, descriptions of the procedure for tailoring the interventions to individual participants | 10, Appendix p.5        |
|                            | 4B   |                                                                                                                                                                                           | Details of how the interventions were standardized                                                                                                                          | 9,10,Appendix p.5       |
|                            | 4C   |                                                                                                                                                                                           | Details of how adherence of care providers with the protocol was assessed or enhanced                                                                                       | 9                       |
| Objectives                 | 5    | Specific objectives and hypotheses                                                                                                                                                        |                                                                                                                                                                             | 7,8                     |
| Outcomes                   | 6    | Clearly defined primary and secondary outcome measures and, when applicable, any methods used to enhance the quality of measurements (e.g., multiple observations, training of assessors) |                                                                                                                                                                             | 12                      |
| Sample size†               | 7    | How sample size was determined and, when applicable, explanation of any interim analyses and stopping rules                                                                               | When applicable, details of whether and how the clustering by care providers or centers was addressed                                                                       | 13                      |

|    |                                        |             |                                                                                                                                                                                                                                                                                                                                                             |                                                                                                                                                                       |
|----|----------------------------------------|-------------|-------------------------------------------------------------------------------------------------------------------------------------------------------------------------------------------------------------------------------------------------------------------------------------------------------------------------------------------------------------|-----------------------------------------------------------------------------------------------------------------------------------------------------------------------|
| 1  |                                        |             |                                                                                                                                                                                                                                                                                                                                                             |                                                                                                                                                                       |
| 2  |                                        |             |                                                                                                                                                                                                                                                                                                                                                             |                                                                                                                                                                       |
| 3  |                                        |             |                                                                                                                                                                                                                                                                                                                                                             |                                                                                                                                                                       |
| 4  |                                        |             |                                                                                                                                                                                                                                                                                                                                                             |                                                                                                                                                                       |
| 5  | Randomization–<br>sequence generation† | 8           | Method used to generate the random allocation<br>sequence, including details of any restriction<br>(e.g., blocking, stratification)                                                                                                                                                                                                                         | When applicable, how care providers were<br>allocated to each trial group                                                                                             |
| 6  |                                        |             |                                                                                                                                                                                                                                                                                                                                                             | 9                                                                                                                                                                     |
| 7  | Allocation concealment                 | 9           | Method used to implement the random<br>allocation sequence (e.g., numbered containers<br>or central telephone), clarifying whether the<br>sequence was concealed until interventions<br>were assigned                                                                                                                                                       | 9                                                                                                                                                                     |
| 8  |                                        |             |                                                                                                                                                                                                                                                                                                                                                             |                                                                                                                                                                       |
| 9  |                                        |             |                                                                                                                                                                                                                                                                                                                                                             |                                                                                                                                                                       |
| 10 |                                        |             |                                                                                                                                                                                                                                                                                                                                                             |                                                                                                                                                                       |
| 11 | Implementation                         | 10          | Who generated the allocation sequence, who<br>enrolled participants, and who assigned<br>participants to their groups                                                                                                                                                                                                                                       | 9                                                                                                                                                                     |
| 12 |                                        |             |                                                                                                                                                                                                                                                                                                                                                             |                                                                                                                                                                       |
| 13 | Blinding (masking)†                    | 11A         | Whether or not participants, those<br>administering the interventions, and those<br>assessing the outcomes were blinded to group<br>assignment                                                                                                                                                                                                              | Whether or not those administering co-<br>interventions were blinded to group assignment                                                                              |
| 14 |                                        |             |                                                                                                                                                                                                                                                                                                                                                             | 9,10                                                                                                                                                                  |
| 15 |                                        |             |                                                                                                                                                                                                                                                                                                                                                             |                                                                                                                                                                       |
| 16 |                                        | 11B         |                                                                                                                                                                                                                                                                                                                                                             | If blinded, method of blinding and description of<br>the similarity of interventions†                                                                                 |
| 17 |                                        |             |                                                                                                                                                                                                                                                                                                                                                             | 9,10,Appendix p.5                                                                                                                                                     |
| 18 | Statistical methods†                   | 12          | Statistical methods used to compare groups for<br>primary outcome(s); methods for additional<br>analyses, such as subgroup analyses and<br>adjusted analyses                                                                                                                                                                                                | When applicable, details of whether and how the<br>clustering by care providers or centers was<br>addressed                                                           |
| 19 |                                        |             |                                                                                                                                                                                                                                                                                                                                                             | 13                                                                                                                                                                    |
| 20 |                                        |             |                                                                                                                                                                                                                                                                                                                                                             |                                                                                                                                                                       |
| 21 |                                        |             |                                                                                                                                                                                                                                                                                                                                                             |                                                                                                                                                                       |
| 22 |                                        |             |                                                                                                                                                                                                                                                                                                                                                             |                                                                                                                                                                       |
| 23 |                                        |             |                                                                                                                                                                                                                                                                                                                                                             |                                                                                                                                                                       |
| 24 |                                        |             |                                                                                                                                                                                                                                                                                                                                                             |                                                                                                                                                                       |
| 25 |                                        |             |                                                                                                                                                                                                                                                                                                                                                             |                                                                                                                                                                       |
| 26 | <b>Results</b>                         |             |                                                                                                                                                                                                                                                                                                                                                             |                                                                                                                                                                       |
| 27 | Participant flow†                      | 13          | Flow of participants through each stage (a<br>diagram is strongly recommended)---<br>specifically, for each group, report the numbers<br>of participants randomly assigned, receiving<br>intended treatment, completing the study<br>protocol, and analyzed for the primary<br>outcome; describe deviations from study as<br>planned, together with reasons | The number of care providers or centers<br>performing the intervention in each group and<br>the number of patients treated by each care<br>provider or in each center |
| 28 |                                        |             |                                                                                                                                                                                                                                                                                                                                                             | 15 <b>Fig 2</b>                                                                                                                                                       |
| 29 |                                        |             |                                                                                                                                                                                                                                                                                                                                                             |                                                                                                                                                                       |
| 30 |                                        |             |                                                                                                                                                                                                                                                                                                                                                             |                                                                                                                                                                       |
| 31 |                                        |             |                                                                                                                                                                                                                                                                                                                                                             |                                                                                                                                                                       |
| 32 |                                        |             |                                                                                                                                                                                                                                                                                                                                                             |                                                                                                                                                                       |
| 33 |                                        |             |                                                                                                                                                                                                                                                                                                                                                             |                                                                                                                                                                       |
| 34 |                                        |             |                                                                                                                                                                                                                                                                                                                                                             |                                                                                                                                                                       |
| 35 | Implementation of<br>intervention†     | New<br>item |                                                                                                                                                                                                                                                                                                                                                             | Details of the experimental treatment and<br>comparator as they were implemented                                                                                      |
| 36 |                                        |             |                                                                                                                                                                                                                                                                                                                                                             | 10,15,16 Appendix<br>p..5,                                                                                                                                            |
| 37 | Recruitment                            | 14          | Dates defining the periods of recruitment and<br>follow-up                                                                                                                                                                                                                                                                                                  | 15,11                                                                                                                                                                 |
| 38 |                                        |             |                                                                                                                                                                                                                                                                                                                                                             |                                                                                                                                                                       |
| 39 | Baseline data†                         | 15          | Baseline demographic and clinical<br>characteristics of each group                                                                                                                                                                                                                                                                                          | When applicable, a description of care providers<br>(case volume, qualification, expertise, etc.) and<br>centers (volume) in each group                               |
| 40 |                                        |             |                                                                                                                                                                                                                                                                                                                                                             | 15,Table 1                                                                                                                                                            |
| 41 |                                        |             |                                                                                                                                                                                                                                                                                                                                                             |                                                                                                                                                                       |
| 42 |                                        |             |                                                                                                                                                                                                                                                                                                                                                             |                                                                                                                                                                       |
| 43 |                                        |             |                                                                                                                                                                                                                                                                                                                                                             |                                                                                                                                                                       |
| 44 |                                        |             |                                                                                                                                                                                                                                                                                                                                                             |                                                                                                                                                                       |
| 45 |                                        |             |                                                                                                                                                                                                                                                                                                                                                             |                                                                                                                                                                       |
| 46 |                                        |             |                                                                                                                                                                                                                                                                                                                                                             |                                                                                                                                                                       |
| 47 |                                        |             |                                                                                                                                                                                                                                                                                                                                                             |                                                                                                                                                                       |
| 48 |                                        |             |                                                                                                                                                                                                                                                                                                                                                             |                                                                                                                                                                       |
| 49 |                                        |             |                                                                                                                                                                                                                                                                                                                                                             |                                                                                                                                                                       |

|                         |    |                                                                                                                                                                                                           |                                                                                                                                                                       |          |
|-------------------------|----|-----------------------------------------------------------------------------------------------------------------------------------------------------------------------------------------------------------|-----------------------------------------------------------------------------------------------------------------------------------------------------------------------|----------|
| Numbers analyzed        | 16 | Number of participants (denominator) in each group included in each analysis and whether analysis was by “intention-to-treat”; state the results in absolute numbers when feasible (e.g., 10/20, not 50%) |                                                                                                                                                                       | 14,15,16 |
| Outcomes and estimation | 17 | For each primary and secondary outcome, a summary of results for each group and the estimated effect size and its precision (e.g., 95% confidence interval)                                               |                                                                                                                                                                       | 15 to 20 |
| Ancillary analyses      | 18 | Address multiplicity by reporting any other analyses performed, including subgroup analyses and adjusted analyses, indicating those prespecified and those exploratory                                    |                                                                                                                                                                       | 15 to 20 |
| Adverse events          | 19 | All important adverse events or side effects in each intervention group                                                                                                                                   |                                                                                                                                                                       | 20       |
| <b>Discussion</b>       |    |                                                                                                                                                                                                           |                                                                                                                                                                       |          |
| Interpretation†         | 20 | Interpretation of the results, taking into account study hypotheses, sources of potential bias or imprecision, and the dangers associated with multiplicity of analyses and outcomes                      | In addition, take into account the choice of the comparator, lack of or partial blinding, and unequal expertise of care providers or centers in each group            | 20,21    |
| Generalizability†       | 21 | Generalizability (external validity) of the trial findings                                                                                                                                                | Generalizability (external validity) of the trial findings according to the intervention, comparators, patients, and care providers and centers involved in the trial | 22       |
| Overall evidence        | 22 | General interpretation of the results in the context of current evidence                                                                                                                                  |                                                                                                                                                                       | 22 to 26 |

\*Additions or modifications to the CONSORT checklist. CONSORT = Consolidated Standards of Reporting Trials.

†This item was modified in the 2007 revised version of the CONSORT checklist.



**A novel oral nutraceutical formula (PLP10) for the treatment of relapsing remitting multiple sclerosis: a randomized, double-blind, placebo-controlled proof-of-concept clinical trial**

|                                 |                                                                                                                                                                                                                                                                                                                                                                                                                                                                                                                                                   |
|---------------------------------|---------------------------------------------------------------------------------------------------------------------------------------------------------------------------------------------------------------------------------------------------------------------------------------------------------------------------------------------------------------------------------------------------------------------------------------------------------------------------------------------------------------------------------------------------|
| Journal:                        | <i>BMJ Open</i>                                                                                                                                                                                                                                                                                                                                                                                                                                                                                                                                   |
| Manuscript ID:                  | bmjopen-2012-002170.R1                                                                                                                                                                                                                                                                                                                                                                                                                                                                                                                            |
| Article Type:                   | Research                                                                                                                                                                                                                                                                                                                                                                                                                                                                                                                                          |
| Date Submitted by the Author:   | 19-Jan-2013                                                                                                                                                                                                                                                                                                                                                                                                                                                                                                                                       |
| Complete List of Authors:       | Pantzaris, Marios; The Cyprus Institute of Neurology and Genetics (CING), Clinic C and PALUPA Medical Ltd<br>Loukaides, George; The Cyprus Institute of Neurology and Genetics (CING), Neurology Clinic and PALUPA Medical Ltd<br>Ntzani, Evangelia; University of Ioannina School of Medicine (UISM), Clinical and Molecular Epidemiology Unit, Department of Hygiene and Epidemiology<br>Patrikios, Ioannis; The Cyprus Institute of Neurology and Genetics (CING), Clinic C and PALUPA Medical Ltd; European University Cyprus, Health Science |
| <b>Primary Subject Heading</b>: | Nutrition and metabolism                                                                                                                                                                                                                                                                                                                                                                                                                                                                                                                          |
| Secondary Subject Heading:      | Neurology, Complementary medicine, Pharmacology and therapeutics                                                                                                                                                                                                                                                                                                                                                                                                                                                                                  |
| Keywords:                       | Nutrition < TROPICAL MEDICINE, NUTRITION & DIETETICS, Multiple sclerosis < NEUROLOGY                                                                                                                                                                                                                                                                                                                                                                                                                                                              |
|                                 |                                                                                                                                                                                                                                                                                                                                                                                                                                                                                                                                                   |

SCHOLARONE™  
Manuscripts



1 **A novel oral nutraceutical formula (PLP10) for the**  
2 **treatment of relapsing remitting multiple sclerosis: a**  
3 **randomized, double-blind, placebo-controlled proof-of-**  
4 **concept clinical trial**

5 **Marios C. Pantzaris, George N. Loukaides, Evangelia E. Ntzani, Ioannis S.**  
6 **Patrikios**

7 The Cyprus Institute of Neurology and Genetics (CING) 1683 Nicosia, Cyprus Marios C.  
8 Pantzaris Senior Consultant Neurologist Neurology Clinic C and PALUPA Medical Ltd., The  
9 Cyprus Institute of Neurology and Genetics (CING) 1683 Nicosia, Cyprus George N.  
10 Loukaides Clinical Dietitian/Nutritionist Neurology Clinic and PALUPA Medical Ltd.,  
11 University of Ioannina School of Medicine (UISM) 45110 Ioannina, Greece Evangelia E.  
12 Ntzani Assistant Professor Clinical and Molecular Epidemiology Unit, Department of  
13 Hygiene and Epidemiology, PALUPA Medical Ltd at The Cyprus Institute of Neurology and  
14 Genetics (CING) 1683 Nicosia, Cyprus Ioannis S. Patrikios Senior Research Scientist,  
15 visiting Professor at European University Cyprus Nicosia, Cyprus, Department of Health and  
16 Science. Correspondence should be addresses to e-mail: [I.Patrikios@euc.ac.cy](mailto:I.Patrikios@euc.ac.cy) or  
17 [pantzari@cing.ac.cy](mailto:pantzari@cing.ac.cy)

18  
19 **Correspondence to:**

20 **Ioannis Patrikios**

21 The Cyprus Institute of Neurology and Genetics (CING)  
22 Neurology Clinic C (PALUPA Medical),

1  
2  
3 23 6 International Airport Av.  
4  
5 24 P.O.Box 23462, 1683 Ayios Dometios. Nicosia, Cyprus  
6  
7 25 Tel: +357 22 358 600, +357 99 097 856;  
8  
9  
10 26 [i.patrikios@euc.ac.cy](mailto:i.patrikios@euc.ac.cy)  
11  
12 27 [patrikiosioannis@gmail.com](mailto:patrikiosioannis@gmail.com)  
13  
14  
15  
16  
17  
18  
19  
20  
21  
22

23  
24  
25  
26  
27  
28  
29 **AND**  
30

31 **Marios Pantzaris**

32 The Cyprus Institute of Neurology and Genetics (CING)  
33 Neurology Clinic C (PALUPA Medical),  
34 6 International Airport Av.  
35 P.O.Box 23462, 1683 Ayios Dometios, Nicosia Cyprus  
36 Tel: +357 22 358 600;  
37 [pantzari@cing.ac.cy](mailto:pantzari@cing.ac.cy)  
38

39 **Keywords:** antioxidant vitamins, polyunsaturated fatty acids, multiple sclerosis, systems  
40 medicine, randomized clinical trial.  
41  
42  
43  
44  
45

46 **Word Count: 6415**  
47  
48  
49  
50  
51  
52  
53  
54  
55  
56  
57  
58  
59  
60

1  
2  
3 **Abstract**  
4

5 **Objective** To assess whether our three novel interventions, formulated based on systems  
6  
7  
8  
9  
10  
11  
12  
13  
14  
15  
16  
17  
18  
19  
20  
21  
22  
23  
24  
25  
26  
27  
28  
29  
30  
31  
32  
33  
34  
35  
36  
37  
38  
39  
40  
41  
42  
43  
44  
45  
46  
47  
48  
49  
50  
51  
52  
53  
54  
55  
56  
57  
58  
59  
60  
61  
62  
63  
64  
65  
66  
67  
68  
69  
70  
71  
72  
73  
74  
75  
76  
77  
78  
79  
80  
81  
82  
83  
84  
85  
86  
87  
88  
89  
90  
91  
92  
93  
94  
95  
96  
97  
98  
99  
100  
101  
102  
103  
104  
105  
106  
107  
108  
109  
110

medicine therapeutic concept reduce disease activity in patients with relapsing remitting multiple sclerosis who were either treated with disease modifying treatment or untreated.

**Design** 30-month randomized double-blind, placebo-controlled, parallel design, phase II proof-of-concept clinical study.

**Settings** Cyprus Institute of Neurology and Genetics (CING)

**Participants and Interventions** 80 subjects were randomized into four groups of 20. The first intervention (A) was composed of omega-3 and omega-6 polyunsaturated fatty acids at 1:1 wt/wt. Specifically, the omega-3 fatty acids were docosahexaenoic acid (DHA) and eicosapentaenoic acid (EPA) at 3:1 wt/wt and the omega-6 fatty acids were linoleic acid (LA) and gamma ( $\gamma$ )-linolenic acid (GLA) at 2:1 wt/wt. This intervention also included minor quantities of other specific polyunsaturated, monounsaturated and specific saturated fatty acids as well as vitamin A and vitamin E (alpha-tocopherol). The third intervention (C) was  $\gamma$ -tocopherol alone. The second intervention (PLP10) was a combination of A and C. A fourth group of 20 received a vehicle placebo. The interventions were administered per os once daily.

**Main outcome measures** The primary endpoint was the annualized relapse rate (ARR) of the three interventions versus placebo at two years. The secondary end point was the time to confirmed disability progression at two years.

1  
2  
3 72 **Results** The per-protocol, proof-of-concept, analysis demonstrated a 64% adjusted relative  
4  
5 73 reduction in ARR at two years for PLP10 versus placebo (P=0.024). Regarding the secondary  
6  
7 74 endpoint, a relative reduction of 86% in the risk of sustained progression of disability was  
8  
9  
10 75 observed within the PLP10 group (p=0.047). No adverse events were reported. Interventions  
11  
12 76 A and C showed no significant efficacy.  
13  
14  
15

16 78 **Conclusions** PLP10 treatment significantly reduced the ARR, and the risk of sustained  
17  
18 79 disability progression without any adverse or severe side effects.  
19  
20  
21  
22

23 81 **Trial registration** International Standard Randomized Controlled Trial, number  
24  
25 82 ISRCTN87818535.  
26  
27  
28  
29  
30  
31  
32  
33  
34  
35  
36  
37  
38  
39  
40  
41  
42  
43  
44  
45  
46  
47  
48  
49  
50  
51  
52  
53  
54  
55  
56  
57  
58  
59  
60

## 92 Introduction

93 Multiple sclerosis (MS) is a complex multifactorial disease that results from interplay  
94 between as yet unidentified environmental factors and susceptibility genes.<sup>1-3</sup> Together, these  
95 factors trigger a cascade of events, involving engagement of the immune system,  
96 inflammatory injury of myelin, axons and glia, functional recovery and structural repair,  
97 gliosis, and neurodegeneration.<sup>4</sup> The bio-mechanisms involved are: immune-mediated  
98 inflammation, oxidative stress and excitotoxicity.<sup>5-9</sup> These mechanisms may all contribute to  
99 oligodendrocyte and neuronal damage and even cell death, hence promoting disease  
100 progression. The increasing prevalence of MS, the limited efficacy and the side effects of the  
101 existing treatments urge the clinical need for the development of new, innovative, more  
102 effective, safe, and preventive treatment strategies.

103  
104 Research has shown that multiple variables dynamically interact and many different complex  
105 interrelated processes are simultaneously orchestrated for MS pathogenesis. The fundamental  
106 distinctiveness of systems medicine (SM) is not just the recognition that different specific  
107 complex factors are important in disease management, but that they need to be incorporated  
108 in some meaningful way to treatment selection and delivery.<sup>10</sup> The primary challenge tackled  
109 by systems scientific approach is the elucidation of how these multiple variables dynamically  
110 interact and how one can apply this understanding to affect the system and achieve a  
111 desirable end.<sup>10</sup> The answer might be the simultaneous interference with all involved  
112 perturbed mechanisms, by using a cocktail of different specific ingredients, potentially able  
113 through synergistic effect to give a long, holistic and effective treatment (Supplementary  
114 Information Methods 1).

115

1  
2  
3 116 The polyunsaturated fatty acids (PUFA) composition of membrane phospholipids plays a  
4  
5 117 direct role in immune and non-immune related inflammation. PUFA and antioxidant  
6  
7 118 deficiencies along with decreased cellular antioxidant defense mechanisms have been  
8  
9 119 reported for MS patients.<sup>11</sup>The cause of these PUFA deficiencies is not entirely clear and may  
10  
11 120 involve metabolic and nutritional alterations.<sup>11</sup>  
12  
13  
14  
15

16 122 Increased or uncontrolled inflammation contributes to several different acute and chronic  
17  
18 123 diseases and it is characterized by the production of inflammatory cytokines, arachidonic acid  
19  
20 124 (AA)-derived eicosanoids (prostaglandins (PGs), thromboxanes (TXs), leukotrienes (LTs),  
21  
22 125 and other oxidized derivatives), other inflammatory agents such as reactive oxygen species  
23  
24 126 (ROS) , nitric oxide (NO), and adhesion molecules (Fig 1).<sup>12</sup> During inflammation glutamate  
25  
26 127 homeostasis is altered by activated immune cells releasing increased quantities of glutamate  
27  
28 128 that can result in over activation of glutamate receptors and in return excitotoxic  
29  
30 129 oligodendroglial death.<sup>7, 13</sup> As such, among others, membrane-related pathology, immune-  
31  
32 130 mediated inflammation, oxidative stress and excitotoxicity provide potentially useful  
33  
34 131 combined targets for intervention in MS.  
35  
36  
37  
38  
39

40 133 *In vitro and in vivo* studies have demonstrated that dietary EPA, DHA, LA, and GLA can be  
41  
42 134 implicated and modulate almost all known complex network of events and pathways  
43  
44 135 repertoire in MS pathophysiology. Brain membrane fatty acid composition can be modified  
45  
46 136 with dietary supplementation, but the process has been showed to be age dependent (it takes  
47  
48 137 much longer in adults versus developing brains) as well as possibly dependent on the  
49  
50 138 quantities of the dietary/supplemented PUFAs.<sup>14</sup> Both human and animal studies proved that  
51  
52 139 diets high in DHA and EPA increase the proportion of these PUFA in the membranes of  
53  
54 140 inflammatory cells and reduce the levels of AA.<sup>12, 15</sup> The anti-inflammatory properties of  
55  
56  
57  
58  
59  
60

1  
2  
3 141 omega-3 include production of PGs and TXs of the 3-series and LTs of the 5-series (Fig 1).<sup>14</sup>  
4  
5 142 <sup>16</sup> Resolvins and protectins are biosynthesized from omega-3 fatty acids via cyclooxygenase-  
6  
7 143 2/lipoxygenase (COX-2/LOX) pathways and they promote control of inflammation in neural  
8  
9 144 tissues (Fig 1).<sup>17-21</sup> T-cell proliferation in acute and chronic inflammation can be reduced by  
10  
11 145 supplementation with either omega-6 or omega-3 PUFA.<sup>22</sup> Furthermore, vitamin E is an  
12  
13 146 important antioxidant that can interrupt the propagation of free radical chain reactions.<sup>23</sup>  
14  
15 147 Vitamin E (alpha-tocopherol, an isoform of vitamin E) efficiently detoxifies hydroxyl,  
16  
17 148 perhydroxyl and superoxide free radicals.<sup>24</sup> However  $\gamma$ -tocopherol (another isoform of  
18  
19 149 vitamin E) seems to be more efficiently implicated in trapping NO radicals.<sup>25</sup> In addition  
20  
21 150 alpha-tocopherol exerts non-antioxidant properties, including modulation of cell signaling  
22  
23 151 and immune function, regulation of transcription, and induction of apoptosis.<sup>26</sup>  
24  
25 152  
26  
27 153 Moreover, omega-3 fatty acids electrophilic derivatives formed by COX-2, in activated  
28  
29 154 macrophages can stimulate the nuclear respiratory factor (Nrf2) inducing the transcription of  
30  
31 155 neuroprotective and antioxidant related genes, and can activate the peroxisome proliferator-  
32  
33 156 activated receptor (PPAR) $\gamma$  for anti-inflammatory response.<sup>27-29</sup> In animal studies, EPA and  
34  
35 157 DHA proved to be endogenous ligands of RXRs, with positive effect on neurogenesis.<sup>30</sup>  
36  
37 158 Additionally, in 2008 Salvati and coworkers reported evidense of accelerated myelination in  
38  
39 159 DHA- and EPA-treated animals.<sup>32</sup> Moreover, DHA and EPA are reported to significantly  
40  
41 160 decrease the levels of metalloproteinases (MMP) -2, -3, -9, and -13 with a significant role in  
42  
43 161 the migration of lymphocytes into the CNS by inducing disruption of the blood brain barrier  
44  
45 162 (BBB), an important step in the formation of MS lesions.<sup>33-39</sup>  
46  
47 163  
48  
49 164 Based on the above, specific PUFA and antioxidant vitamins fulfill the criterion of biologic  
50  
51 165 plausibility and have the potential to diminish MS symptoms severity and activity, even  
52  
53  
54  
55  
56  
57  
58  
59  
60

1  
2  
3 166 promoting recovery (remyelination).<sup>11</sup> Overall, PLP10 includes multiple ingredients  
4  
5 167 interacting with key interconnected components within functional network modules, each  
6  
7 168 contributing a fraction of the effects of perturbations that cause the disease.<sup>40</sup>  
8  
9

10 169

11  
12 170 In our phase II, single-center, randomized, double-blind, placebo-controlled, proof-of-  
13  
14 171 concept clinical trial we intended to evaluate the therapeutic ability of PLP10 and of two  
15  
16 172 other interventions (A and C) consisting of PLP10 constituent partial fractions versus  
17  
18 173 placebo, when used on RRMS patients.  
19

20  
21 174

22  
23 175

## 24 25 26 176 **Methods**

### 27 28 177 **Patients**

29  
30 178 Eligibility criteria were an age of 18 to 65; a diagnosis of RRMS according to the McDonald  
31  
32 179 criteria; a score of 0.0 to 5.5 on the EDSS, a rating that ranges from 0 to 10, with higher  
33  
34 180 scores indicating more severe disability; MRI showing lesions consistent with MS; and at  
35  
36 181 least one documented clinical relapse either receiving or not disease modifying treatment  
37  
38 182 (DMT) within the 24 months period before beginning (enrollment) of the study. Patients were  
39  
40 183 excluded because of a recent (<30 days) relapse, prior immunosuppressant or monoclonal  
41  
42 184 antibodies therapy, pregnancy or nursing, other severe disease compromising organ function,  
43  
44 185 progressive MS, history of recent drug or alcohol abuse, use of any additional food  
45  
46 186 supplement, vitamin, or any form of PUFA, history of severe allergic or anaphylactic  
47  
48 187 reactions or known specific nutritional hypersensitivity. No monitor or limitations on  
49  
50 188 patients' daily diet habits were included in the study design since the quantities of the  
51  
52 189 ingredients within the formulas daily-dosage could not be significantly affected or spoiled by  
53  
54  
55  
56  
57  
58  
59  
60



1  
2  
3 190 any confounding factors within any known global daily food diet (see procedures, treatment  
4  
5 191 regimen and end-points).  
6

7 192  
8

9 193 The study was conducted in accordance with the standards of the International Conference of  
10  
11 194 Harmonization Guidelines for Good Clinical Practice. The protocol was developed by the  
12  
13 195 investigators and it was approved by the Cyprus National Bioethics Committee and was  
14  
15 196 overseen by an independent safety-monitoring committee evaluating the safety and over-all  
16  
17 197 benefit-risk profiles. The adherence of care providers with the protocol was assessed by an  
18  
19 198 external committee assigned by the funder of the project through reviews of case report  
20  
21 199 forms. All patients gave written informed consent at the time of enrolment.  
22  
23  
24

25 200  
26

### 27 201 **Randomization and masking**

28  
29 202 Patients were randomly assigned to four intervention groups in a 1:1:1:1 ratio stratified by  
30  
31 203 gender (women to men, 3:1). Randomization was facilitated by a lottery-type pool of  
32  
33 204 numbered balls. Patients were randomly assigned to treatment in blocks of four by flipping a  
34  
35 205 coin as follows: for the first two drawn balls heads stratified them to the groups A/B and tails  
36  
37 206 stratified them to the groups C/D. The other two balls were stratified accordingly. A second  
38  
39 207 toss of the coin assigned the two patients to group A (head)/B (tail) or group C (head)/D  
40  
41 208 (tail). The randomization scheme was generated, performed and securely stored by Helix  
42  
43 209 Incubator Organization of Nicosia University (HIONU).  
44  
45  
46

47 210  
48

49 211 The interventions had identical appearance and smell in dark bottles (15 daily-dose  
50  
51 212 portions/bottle) under nitrogen bed and labeled by HIONU with code numbers, unidentifiable  
52  
53 213 for both patients and investigators. Study data were collected by the investigators and saved  
54  
55 214 by the HIONU that also held the blinded codes of the study. All study personnel involved in  
56  
57  
58  
59  
60

1  
2  
3 215 the conduct of the study were blinded throughout the study. Treating/examining physician,  
4  
5 216 other investigators, pharmacist, neuroradiologist and patients were masked to treatment  
6  
7 217 allocation.  
8

9  
10 218

### 11 219 **Procedures and end points**

12  
13  
14 220 The specific omega-3 (re-esterified glycerides) and omega-6 (glycerides) raw materials were  
15  
16 221 purchased according to the required interventions' PUFA-fraction specification (molecular  
17  
18 222 structure, quantity/ratio and quality) with vitamin E (alpha-tocopherol) used as antioxidant  
19  
20 223 stabilizer by the supplier. The vitamins and masking aroma were purchased separately. The  
21  
22 224 mixing of fractions to the final required intervention-composition specification was always  
23  
24 225 performed by the same team of scientists under the supervision of the involved medical  
25  
26 226 biochemist and lipidology specialist, under appropriate conditions every six months.  
27  
28 227 Interventions were stored refrigerated in dark until use. See Table 1 and Supplementary  
29  
30 228 Information Methods 1 and 2 for intervention specification detailed description and  
31  
32 229 study/intervention rational.  
33  
34  
35

36 230

37  
38 231 Participants were randomly assigned to receive a daily dose of a mixture of EPA (1,650mg) /  
39  
40 232 DHA (4,650mg) / GLA (2,000mg) / LA (3,850mg) / total other omega-3 (600mg) / total  
41  
42 233 MUFA (1,714mg) + total SFA (18:0 160mg, 16:0 650mg) / vitamin A (0.6mg) / vitamin E  
43  
44 234 (22mg) (intervention A, group A); or composed mixture of pure  $\gamma$ -tocopherol (760mg)  
45  
46 235 dispersed in pure virgin olive oil (16,137 mg) as delivery vehicle (intervention C, group C);  
47  
48 236 or a mixture of intervention formula A with intervention C without the pure virgin olive oil  
49  
50 237 (intervention B, named PLP10, group B); or placebo composed of pure virgin olive oil  
51  
52 238 (16,930mg) (intervention D, group D) (Table 1). Citrus-aroma was used as masking agent of  
53  
54 239 the taste and odor and added in each one of the intervention for a total of 19.5ml dosage of  
55  
56  
57  
58  
59  
60

1  
2  
3 240 solution per day. The institution's pharmacist was responsible for the appropriate storage and  
4  
5 241 handling of the interventions to the individual participants. The interventions were taken  
6  
7 242 orally once daily 30 minutes before dinner by a dosage calibrated cup for 30 months. The  
8  
9 243 ingredients, ratio and dose have been selected based on their biophysical interrelation to the  
10  
11 244 total known multiple MS causing factors, their biochemical importance and the role expected  
12  
13 245 to play in the normalisation and treatment of the involved complex network of events in the  
14  
15 246 disease pathophysiology. Moreover, the high intake dosage was used to overcome any  
16  
17 247 abnormal dietary accumulation of related agents as a result of patients' food intake habits,  
18  
19 248 irrespective of geographical origin, in relation to the daily consumption ratio of the total fatty  
20  
21 249 acid intake; in order to end-up with omega-3 to omega-6 PUFA indicated physiological body  
22  
23 250 ratio composition of 1:1 wt/wt.  
24  
25  
26  
27

251

29 252 The period beginning from July 1<sup>st</sup> 2007 (enrolment) until December 31<sup>st</sup> 2007 (entry  
30  
31 253 baseline) was used for normalization period. This six-month normalization period would  
32  
33 254 allow the interventions' agents to exert their beneficial effect (for the  
34  
35 255 incorporation/normalization of cell membranes by oral PUFA, since they need four to six  
36  
37 256 months to exert pivotal action on immune and neural cells, correction of antioxidant  
38  
39 257 deficiency and body PUFA, and optimal normalization of EPA and DHA levels/ratio).<sup>41-43</sup>  
40  
41  
42

43 258 The study was completed on December 31<sup>st</sup> 2009 and the recording of relapses continued  
44  
45 259 until December 31<sup>st</sup> 2010. More clearly the study included the "normalization period" (July  
46  
47 260 1<sup>st</sup> 2007 to Dec 31<sup>st</sup> 2007), the "on treatment" period (Jan 1<sup>st</sup> 2008 to Dec 31<sup>st</sup> 2009) and the  
48  
49 261 12-month "extended period" (Jan 1<sup>st</sup> 2010– Dec 31<sup>st</sup> 2010).  
50  
51

262

54 263 Depending on their clinical status and in accordance with the ethical issues governing clinical  
55  
56 264 trials participants continued receiving the indicative regular available treatments, according to  
57  
58  
59  
60

1  
2  
3 265 international guidelines with persistent evaluation of any side-effects and adverse events.

4  
5 266 The study was designed to end 30 months after enrolment and clinical assessments were

6  
7 267 scheduled at entry baseline, 3, 9, 15, 21 and 24 months on-treatment. Patients were also

8  
9 268 clinically examined by the treating neurologist within 48 hours after the onset of new or

10  
11 269 recurrent neurologic symptoms.

12  
13  
14 270

15  
16 271 The primary end point was the ARR at two years. A relapse was defined as new or recurrent

17  
18 272 neurologic symptoms not associated with fever or infection that lasted for at least 24 hours

19  
20 273 and accompanied by new neurologic signs. Relapses were treated with methyl-prednisolone

21  
22 274 at a dose of 1g intravenous per day, for three days followed by prednisone orally at a dose of

23  
24 275 1mg/kg of weight per day on a tapering scheme for three weeks. The secondary end point at

25  
26 276 two years was the time to confirmed disability progression, defined as an increase of 1.0 or

27  
28 277 more on EDSS, confirmed after six months (progression could not be confirmed during a

29  
30 278 relapse). The final EDSS score was confirmed six months after the end of the study. A post-

31  
32 279 hoc analysis was performed assessing the proportion of patients free from new or enlarging

33  
34 280 T2 lesions on brain MRI scans at the end of the study for the per-protocol participants of the

35  
36 281 group receiving the highest effective intervention versus placebo. Comparison was made only

37  
38 282 versus the available archival MRI scans up to three months before the enrolment date. MRI

39  
40 283 scans were performed and blindly analyzed at an MRI evaluation centre. The patients

41  
42 284 continued to be followed for additional 12 months after completion of the trial and relapses

43  
44 285 were recorded. Finally, patients were strongly encouraged to remain in the study for follow-

45  
46 286 up assessments even if they had discontinued the study drug.

47  
48  
49  
50  
51 287

52  
53 288 Blood samples were collected from all randomized patients at the time of enrolment, at every

54  
55 289 scheduled clinical assessment and during relapses. To check individual compliance with

56  
57  
58  
59  
60

1  
2  
3 290 intake, the fatty acids composition of patients' red blood cells' membranes was determined,  
4  
5 291 by gas chromatography, according to a standard protocol. The fatty acid analyses were  
6  
7 292 performed after study termination and thus did not influence the blinding.  
8  
9

10 293

11 294 The involved neurologist was experienced with more than 20 years in practice and trained to  
12  
13 295 standardise EDSS scoring procedures, examined patients, made all medical decisions,  
14  
15 296 determined the EDSS score and reviewed adverse or side-effects. The medical biochemist,  
16  
17 297 specialist on lipidology and immunology and the registered clinical dietitian, members of the  
18  
19 298 investigator team were experienced with more than 25 years in practice. Patients were able to  
20  
21 299 contact the neurologist at any time if there was any adverse event, side-effect or allergic  
22  
23 300 reaction. The study drug was not suspected to have any clinical or laboratory adverse effects  
24  
25 301 different from placebo that could disturb the double-blind nature of the trial. Therefore, the  
26  
27 302 same study-neurologist functioned as both the treating and evaluating physician.  
28  
29  
30  
31

32 303

33  
34 304 Safety measures were assessed from the time of enrollment until 12 months following study  
35  
36 305 completion. Haematological and biochemical tests were performed at enrolment and at every  
37  
38 306 12 months, including full blood count, renal and liver function tests, proteins, cholesterol,  
39  
40 307 triglycerides, glucose and electrolytes.  
41  
42

43 308

44  
45 309 The whole procedure followed the clinical trial guidelines as required by the USA Food and  
46  
47 310 Drug Administration, European Medicines Agency, and the Committee for Medicinal  
48  
49 311 Products for Human Use.<sup>44</sup>  
50

51 312

52  
53  
54 313 **Statistical analysis**  
55  
56  
57  
58  
59  
60

1  
2  
3 314 Power calculations could not be done before the study because of the lack of information  
4  
5 315 from previous studies on potential effect sizes. In 2005 the prevalence of MS in Cyprus  
6  
7 316 (600,000 population) was 120/100.000. Based on the aforementioned MS patients' numbers  
8  
9 317 of our country and the centre of reference, the CING, we were able to enrol the 20% of the  
10  
11 318 total RRMS patients eligible for treatment in the trial. Sample size was strictly based on this  
12  
13 319 subjects' availability parameter and the novelty of the assessed intervention.  
14  
15  
16  
17

320

18 321 Baseline characteristics were compared across all intervention groups by ANOVA or  
19  
20 322 Kruskal-Wallis rank test for continuous variables and by mean Fisher's exact test for  
21  
22 323 categorical variables, as appropriate.  
23  
24

324

25  
26  
27 325 For the primary outcome, the ARR was analysed in a pair-wise fashion for the active  
28  
29 326 interventions compared to placebo using negative binomial regression models adjusted for  
30  
31 327 number of relapses within two years before baseline, EDSS score at baseline and DMT. The  
32  
33 328 relapse rate was calculated as the total number of relapses divided by the total number of  
34  
35 329 patient-years followed for each treatment group. ARR differences were also calculated  
36  
37 330 among all comparable parameters and reported as percent difference.  
38  
39

331

40  
41  
42 332 For the secondary end-point outcome, the time to disability progression, Kaplan–Meier  
43  
44 333 curves were constructed. Progression to disability and time thereof was compared in a pair-  
45  
46 334 wise fashion for the active interventions versus placebo by the log-rank test in the main  
47  
48 335 analysis and by Cox proportional-hazards models with adjustment for baseline EDSS score,  
49  
50 336 age and DMT in the supportive analysis. Each test was performed with a significance level of  
51  
52 337 0.05. Multivariate models considered all variables with  $P < 0.1$  on univariate models. There  
53  
54 338 was no overt violation of the proportionality assumption.  
55  
56  
57  
58  
59  
60

339

340 Both, per-protocol and intention to treat (ITT) analyses were performed, for different sets of  
341 research questions to be answered, and both are reported. Missing data of the five lost to  
342 follow patients were imputed by use of the last-observation-carried-forward (LOCF)  
343 approach. Due to the proof-of-concept design of the study, the considerable non-adherence  
344 rate (49%) and the interpretation issues caused thereof regarding the ITT analysis, the per-  
345 protocol analysis considered being more informative and appropriate method approach to  
346 answer the research addressed questions of efficacy of the interventions when subjects were  
347 continuously following the protocol. All statistical analyses were well defined a priori. All  
348 analyses were performed with STATA SE 10.0 (College Station, TX, USA). P-values are  
349 two-tailed.

350

### 351 **Role of the funding source**

352 The funders had no role in study design, data collection and analysis, decision to publish, or  
353 preparation of the manuscript. All members of the writing group had full access to all study  
354 data and contributed to its interpretation and prepared, reviewed, and approved the  
355 manuscript for submission. All authors had final responsibility for the decision to submit the  
356 paper for publication.

357

## 358 **Results**

### 359 **Study population**

360 From July 2007 through December 2010 (including the 12-month extended period), a total of  
361 80 MS patients were randomly assigned to a study group at the CING (tertiary neurological  
362 center).

363

1  
2  
3 364 Among the 80 patients, 20 patients were randomly assigned to each of the three groups to  
4  
5 365 receive the interventions and 20 to receive placebo (Fig 2). Baseline characteristics of both  
6  
7 366 the ITT and the per-protocol populations were similar across groups (Table 2A and 2B).  
8  
9 367 Total drop-out patients completed follow-up until study completion and were included in the  
10  
11 368 ITT analyses (Table 4). Five patients were totally lost to follow before their first scheduled  
12  
13 369 visit and two patients dropped-out before their first scheduled visit progressed to secondary  
14  
15 370 progressive MS. Fifteen patients dropped-out without successfully completing the  
16  
17 371 “normalization” period including five pregnancies. Another 17 patients dropped-out early  
18  
19 372 after entry baseline. Seven patients that dropped out were given monoclonal antibody  
20  
21 373 treatment (natalizumab). Overall, a total of 41 (51%) patients completed the 42-month study  
22  
23 374 (July 2007 through December 31<sup>st</sup> 2010, including the 12-month extended period) where one  
24  
25 375 patient from group A and two from the placebo group transferred on natalizumab, and 39  
26  
27 376 (49%) patients either withdrew (drop-out) or lost to follow. Reasons for study-interventions  
28  
29 377 discontinuation are listed in Figure 2.  
30  
31  
32  
33  
34  
35

### 36 379 **Efficacy**

### 38 380 **Relapses**

39  
40 381 As a proof-of-concept trial we primarily needed to answer whether the interventions were  
41  
42 382 effective for those MS patients who adhere to the assigned treatment, the per-protocol  
43  
44 383 analysis.<sup>45</sup> For the sake of methodological comprehensiveness we also present the ITT  
45  
46 384 analysis as a secondary analysis, to answer a different question, complementary to our core  
47  
48 385 hypothesis; like what happened to MS patients who were placed on the interventions (the  
49  
50 386 effect of assignment).<sup>45</sup> Otherwise, as a result of a high drop-out rate, an ITT analysis will not  
51  
52 387 likely be able to show the superiority of an intervention even if it is effective.<sup>45</sup> In any  
53  
54 388 instance, the proper approach of evaluating a study data is to understand what question  
55  
56  
57  
58  
59  
60



1  
2  
3 389 prompted the research and assure that the analysis is appropriate for providing the answer  
4  
5 390 whatever it is called. Both analyses can be performed for a study, using the results from the  
6  
7 391 different analyses to answer different research questions.<sup>45</sup> These interventions are original,  
8  
9 392 composed by a different treatment rational, the SM, never tested before and the important  
10  
11 393 main concern was to evaluate their efficacy and safety based on the per-protocol treated MS  
12  
13 394 patients, without any peripheral noise. The question that had to be answered was: “what  
14  
15 395 happens to the patients that are placed and stick on the specific treatment”.

16  
17 396  
18  
19  
20  
21 397 Regarding the per-protocol analysis, during the first year of treatment, the ARR was 0.80,  
22  
23 398 0.40, 0.78 and 0.83 for the four intervention groups respectively. During the second year, the  
24  
25 399 ARR was 0.90, 0.40, 0.67 and 1.25 for the four intervention groups respectively. Overall, for  
26  
27 400 the two-year primary end point, 8 relapses were recorded for the 10 patients in PLP10 group  
28  
29 401 (0.40 ARR) versus 25 relapses for the 12 patients in placebo (1.04 ARR), a 64% adjusted  
30  
31 402 relative rate reduction (RRR) for the PLP10 group (RRR 0.36, 95% confidence interval (CI)  
32  
33 403 0.15 to 0.87,  $p=0.024$ ) (Tables 3A, 5 and Fig 3A and 3C). Excluding patients on monoclonal  
34  
35 404 antibody (natalizumab) treatment, the observed adjusted RRR became stronger (72%) over  
36  
37 405 the two years (RRR 0.28, 95% CI 0.10 to 0.79,  $p=0.016$ , Tables 3B and 5). Pair-wise  
38  
39 406 comparisons for the other two groups against placebo did not yield statistically significant  
40  
41 407 results (Tables 3A, 3B). The proportion of patients with  $\leq 1$  relapse for the two years on-study  
42  
43 408 was higher in the PLP10 group than in the placebo group (90% versus 42%,  $p=0.030$ , Table  
44  
45 409 5). Seeking to investigate further the observed difference, we compared the relapse rate  
46  
47 410 during the 24 months before entry to the study to the 24 months on-treatment for each  
48  
49 411 intervention group. We observed a statistically significant relative reduction in the ARR  
50  
51 412 (70%) only in the PLP10 group (RRR 0.30; 95% CI 0.14 to 0.65,  $p=0.003$ , Table 3A);  
52  
53 413 within-group comparisons for the three other groups ARR reduction was not significant and  
54  
55  
56  
57  
58  
59  
60

1  
2  
3 414 remained not significant when natalizumab treated patients were further excluded from the  
4  
5 415 analysis. The effect of PLP10 through time at different time-windows versus placebo for all-  
6  
7 416 time on-study patients is shown in Figures 3A to 3D. The ARR analysis, within time-  
8  
9 417 windows, was not an assigned endpoint, but it could help in the process of evaluating parallel  
10  
11 418 information as the time needed for a specific treatment intervention activity to be evident, as  
12  
13 419 well as the efficacy profile through time. PLP10 reached maximum effect within a year on-  
14  
15 420 treatment (counting from the entry baseline) and remained stable at an ARR of 0.4,  
16  
17 421 displaying a steadily reduced ARR with long free-relapse time-windows. These group B  
18  
19 422 characteristics are considered important parameters of a successful MS treatment where the  
20  
21 423 rule than the exception is the heterogeneity among patients' disease evolution. Specifically,  
22  
23 424 Figure 3D demonstrates the dispersion of relapses throughout the 2-year period of all-time  
24  
25 425 on-study (excluding patients on natalizumab) of PLP10 (n=10) versus placebo (n=10).  
26  
27  
28  
29 426 Placebo, in line with the existing knowledge of how relapse history works in relation to future  
30  
31 427 relapses on MS patients (contagion phenomenon) indicates the expected linearly increased  
32  
33 428 trend of the relapse incidence.<sup>46</sup> The same phenomenon was true for the groups A and C.  
34  
35  
36 429 Finally, during the 12 month post-study extended period (January 1<sup>st</sup> 2010 to December 31<sup>st</sup>  
37  
38 430 2010) all-time on-study patients that received PLP10, showed persistent benefit in the ARR  
39  
40 431 compared to placebo (six relapses for the 10 subjects within PLP10, 0.6 ARR versus 19 for  
41  
42 432 the 12 subjects within placebo group, 1.58 ARR) indicating a statistically significant 62%  
43  
44 433 adjusted relative rate reduction in the ARR for the PLP10 group (RRR 0.38, 95% CI 0.12 to  
45  
46 434 0.99, p=0.046).

435

436 Regarding the ITT analysis, within PLP10 group, none of the nine drop-out patients changed  
437 to natalizumab and two out of nine discontinued because of pregnancy, whereas two out of  
438 seven drop-out patients from the placebo group changed to natalizumab (a total of four

1  
2  
3 439 patients within the placebo arm population were on natalizumab, including the two patients  
4  
5 440 that transferred while all-time on-study versus none within PLP10 group (Supplementary  
6  
7 441 Information Fig 1). As reported, natalizumab reduces ARR by 68%, decreases the possibility  
8  
9 442 of disability progression by 43% with 57% of patients free of new or enlarging T2 lesions on  
10  
11 443 MRI scans compared to 15% on placebo.<sup>47</sup> The relapses of the drop-out patients are reported  
12  
13 444 in Table 4A. As expected no statistically significant differences in the ARR were calculated  
14  
15 445 for the comparison of any group versus placebo for the 24 months on-treatment, with a 0.75  
16  
17 446 ARR within PLP10 (30 relapses) and 1.03 ARR within placebo (41 relapses) group, a 27%  
18  
19 447 ARR reduction (Table 4B). Interestingly, despite the high non-adherence rate, there was a  
20  
21 448 statistically significant difference for the comparison of the ARR in the 24 months before  
22  
23 449 entry baseline to the 24 months on-treatment for the PLP10 group (RRR 0.45, 95% CI 0.26 to  
24  
25 450 0.78, p=0.005).

451

### 452 **Disability progression**

453 Regarding the per-protocol analysis, at two years, the time to disability progression, with  
454 confirmation after six months (secondary end-point) was significantly longer only with  
455 PLP10. The cumulative probability of disability progression was 10% in the PLP10 group  
456 and 58% in the placebo group (p=0.019) (Supplementary Information Fig 2). After excluding  
457 patients on natalizumab, there was an increased statistically significant difference between  
458 the PLP10 and the placebo group for the same analysis (p=0.006) (Fig 4A). At two years, the  
459 cumulative probability of progression was 10% in the PLP10 group and 70% in the placebo  
460 group, which represents a decrease of 60 percentage points or a relative 86% decrease in the  
461 risk of sustained progression of disability within PLP10 group (adjusted hazard ratio, 0.11;  
462 95% CI 0.01 to 0.97, p=0.047). One versus seven out of ten patients progressed to confirmed  
463 disability in the PLP10 and the placebo groups respectively when patients on natalizumab

1  
2  
3 464 were excluded. No statistically significant difference was observed for any comparison of the  
4  
5 465 other two groups compared to placebo (Fig 4A and Supplementary Information Fig 2).  
6

7 466

8  
9 467 Regarding the ITT analysis, at two years, the cumulative probability of progression was 10%  
10  
11 468 in the PLP10 group and 35% in the placebo group ( $p=0.052$ , a trend for an effect), which  
12  
13 469 represents a decrease of 25 percentage points or a relative 71% decrease of the PLP10 for the  
14  
15 470 risk of sustained progression of disability (adjusted hazard ratio 0.22, 95% CI 0.04 to 1.07,  
16  
17 471  $p=0.06$ ) (Fig 4B). Two versus seven out of the total randomized patients progressed to  
18  
19 472 confirmed disability in the PLP10 and the placebo groups respectively. No significant  
20  
21 473 differences were observed for groups A or C against placebo (Fig 4B). The mean change in  
22  
23 474 Expanded Disability Status Scale (EDSS) score as a function of visit number is shown in  
24  
25 475 Figure 5.  
26  
27  
28  
29

30 476

### 31 477 **MRI**

32  
33 478 Over two years, the MRI results support the overall conclusion from the study that PLP10 has  
34  
35 479 a positive effect on disease activity since only 29% from the PLP10 group as opposed to 67%  
36  
37 480 from the placebo group developed new or enlarging T2 lesions (57% relative risk reduction).  
38  
39 481 Excluding patients on natalizumab there is an increased relative risk reduction (64%) between  
40  
41 482 PLP10 as opposed to placebo with 29% of patients on PLP10 and 80% on placebo with  
42  
43 483 development of new or enlarging T2 lesions (Table 5).  
44  
45  
46  
47

48 484

### 49 485 **Safety**

50  
51 486 Over the course of the 30 month study no significant adverse events were reported from any  
52  
53 487 group. According to a questioner procedure the only aetiology for drop-outs was the  
54  
55 488 palatability and smell of the formula preparations. Nausea was reported by two patients. No  
56  
57  
58  
59  
60

1  
2  
3 489 abnormal values observed on any of the biochemical and haematological blood tests. No  
4  
5 490 allergic reactions reported.  
6

7  
8 491

## 9 10 492 **Discussion**

11  
12 493 In this proof-of-concept clinical trial assessing the safety and efficacy of three cocktail  
13  
14 494 intervention formulas in RRMS, we observed a significant benefit for the novel PLP10  
15  
16 495 intervention compared to placebo for both the ARR and the progression to disability. Our  
17  
18 496 results include analyses pertaining to a total of 42 months study collected data, including the  
19  
20 497 12-month, free of intervention treatment, extension period. We focused on the per-protocol  
21  
22 498 data analysis since it is the appropriate method to best provide the answer to the proof-of-  
23  
24 499 concept trial-addressed question. The high drop-out rate was solely the result of formulas  
25  
26 500 palatability, a common phenomenon in trials using oily interventions where a lot of patients  
27  
28 501 tend to drop-out soon after first dosage. We thus present our main per-protocol analysis, as  
29  
30 502 well as a subgroup analysis excluding patients on natalizumab. We have found a statistically  
31  
32 503 significant reduction in the ARR and the disability progression comparing not only patients  
33  
34 504 on PLP10 versus placebo but also comparing the ARR of the PLP10 patients in the 24-month  
35  
36 505 period prior to the study to the ARR of the 24 months on-study; the observed differences  
37  
38 506 became larger when patients that received natalizumab (the most potent disease modifier)  
39  
40 507 were excluded. The ARR decreased within a year on PLP10 and significantly remained stable  
41  
42 508 until study completion. Statistically significant difference of ARR between patients on PLP10  
43  
44 509 versus placebo continued for the additional 12 month extended period (persistent effect)  
45  
46 510 without significant difference on DMT. These clinical findings are supported by the results  
47  
48 511 regarding the MRI analysis where the proportion of patients free from new or enlarging brain  
49  
50 512 T2 lesions was also higher in PLP10 group versus placebo. The persistent effect within the  
51  
52 513 extended period it is considered of major importance and supportive of the results since it is  
53  
54  
55  
56  
57  
58  
59  
60

1  
2  
3 514 in agreement with the very long washouts, reported necessary, for omega-3 fatty acids and  
4  
5 515 especially DHA to return towards pretreatment values within the fatty acids of plasma,  
6  
7 516 platelets, monocytes and red blood cells.<sup>42</sup> This study also provides important 30-month,  
8  
9 517 placebo-controlled information about the safety of PLP10, A and C interventions, where no  
10  
11 518 any adverse or severe side effects have been reported.  
12  
13

14 519  
15  
16 520 As medications used to treat MS become increasingly highly specific and potent, attention to  
17  
18 521 safety is paramount. Current available treatments are products of reductionism, partially  
19  
20 522 effective, associated with severe side effects without (re)myelinating or neuroprotective  
21  
22 523 abilities. Interferons and glatiramer acetate, the most widely used first-line MS drugs  
23  
24 524 available today, are associated with the least severe side-effects among MS therapies but they  
25  
26 525 are reported with only 29-33% ARR reduction and with no significant effects on the  
27  
28 526 progression of disability. Natalizumab as previously discussed and Fingolimod with 54%  
29  
30 527 ARR reduction (without significant benefit on the progression of disability) are second-line  
31  
32 528 drugs associated with severe side-effects.<sup>47, 48</sup>  
33  
34  
35

36 529  
37  
38 530 No existing MS treatment has ever been designed as a result of SM concept approach or with  
39  
40 531 a potential to effectively stimulate intrinsic remyelinating and neuroprotecting mechanisms or  
41  
42 532 exert such an action. Now we propose that a holistic SM model approach has to be applied by  
43  
44 533 synchronized action on all involved perturbed mechanisms. PLP10 has innovative  
45  
46 534 characteristics like no any other intervention or medication tried before for MS treatment,  
47  
48 535 with unique efficacy abilities through different mechanisms of action, probably by the  
49  
50 536 synergistic effect of its constituent ingredients. PLP10 has all the characteristics of a medical  
51  
52 537 food with the action to feed a normal metabolic process by supplying nutritional structural  
53  
54 538 membrane precursors, building blocks, and vitamins from dietary sources that enhance  
55  
56  
57  
58  
59  
60

1  
2  
3 539 remyelination and neuroprotection and simultaneously promote normalization of all cellular  
4  
5 540 membranes lipid content. The intention is to normalize the specific nutritional requirements  
6  
7 541 of the MS patients.  
8  
9  
10 542  
11  
12 543 Different factors and molecular entities appear to be part of the possible aetiology for MS  
13  
14 544 with specific PUFA and antioxidants found to be key substances related to all known  
15  
16 545 pathogenic and recovery mechanisms. But, it is well established that MS patients are  
17  
18 546 characterized with significant deficiencies in antioxidant efficiency as well as in PUFA levels  
19  
20 547 in blood and cellular membranes.<sup>11, 49-51</sup>  
21  
22  
23 548  
24  
25 549 According to one hypothesis, the change in the ratio of omega-3 to omega-6, due to  
26  
27 550 increasing consumption of omega-6 PUFA, meaning high accumulation of AA, in the  
28  
29 551 Western diet, may be one of the major factors responsible for the increasing incidence of  
30  
31 552 inflammatory diseases relative to populations. In the Western diet, the ratio of omega-3 to  
32  
33 553 omega-6 is about 1:20–30; in populations that consume fish-based diets, the ratio is about  
34  
35 554 1:1–2.<sup>52, 53</sup> The intervention daily dose was aiming and believed to be high enough to  
36  
37 555 restore/amplify body efficient antioxidant activity and ensure cellular membranes lipid profile  
38  
39 556 normalization (PUFA content) and simultaneously potentiate involvement of the ingredients  
40  
41 557 in the anti-inflammatory and recovery mechanisms. Diet fatty acid molecules need about six  
42  
43 558 months period to exert their beneficial effect and this essential parameter was for the first  
44  
45 559 time under consideration in our study design (normalization period).<sup>42</sup> This chronotherapy  
46  
47 560 parameter it is of major importance in line with the SM treatment philosophy and if it is not  
48  
49 561 included in the trial design the possibility of misleading result evaluation greatly increases. In  
50  
51 562 fact, considering that omega-3 supplementation can release and replace excess AA within the  
52  
53  
54  
55  
56  
57  
58  
59  
60

1  
2  
3 563 cellular membranes, we can speculate that an increased inflammatory activity can possibly  
4  
5 564 result during the first six months of supplementation (during normalization period).  
6  
7  
8

9 565

10 566 The maintenance of myelin requires continued turnover of its components throughout life.<sup>54,55</sup>

11 567 In addition to the EPA, DHA, LA, and GLA, PLP10 was containing limited quantities of

12 568 other structural PUFA, specific MUFA (mostly oleic acid) and SFA (palmitic and stearic

13 569 acid), specifically to provide a direct source for neuronal cell membranes rehabilitation and

14 570 for (re)myelination and neuroprotection since they are all major components, precursors and

15 571 building blocks of any new physiological myelin and cellular membranes in general.

16 572 Assembly of the correct molecules into myelin membrane may be especially critical during

17 573 active synthesis. Possibly, if critical constituents aren't available or are metabolically

18 574 blocked, amyelination, dysmyelination or demyelination may ensue.<sup>56</sup>

19 575

20 576 The well known and established safety of the ingredients used and the protocol guidelines

21 577 were supportive reasons for us to proceed with the clinical study even though with limitation

22 578 on the pre-estimation of required trial sample size as it was discussed in method section. The

23 579 adherence of the subjects is another issue but the duration of the study (42 months) is adding

24 580 power to the results;<sup>44</sup> having the research questions been consciously and carefully

25 581 approached and answered. Furthermore, the statistical methodologies used along with the

26 582 appropriate adjustments, broadly accepted for MS clinical trials, power the findings, results,

27 583 and significance. The baseline characteristics of the treatment arms could possibly be

28 584 considered indicative of four very active groups of patients but that was the result of the

29 585 limited number of RRMS population eligible for the study within Cyprus. On the other hand

30 586 the balanced baseline characteristics without statistical differences, the statistical adjustments

31 587 (for all important baseline parameters i.e. relapses, EDSS, age and DMT) and the



1  
2  
3 588 randomization within four different groups are the safety valves against data  
4  
5 589 misinterpretation. Yet, in small randomized control trials with a high drop-out rate, the per-  
6  
7 590 protocol analysis could be affected by the characteristics of the patients dropping out. In  
8  
9 591 order to safeguard our findings in the best possible way under the circumstances, we  
10  
11 592 proceeded to adjusting for confounders. Moreover, we cannot discard our finding as a false  
12  
13 593 positive, given that this is a randomized, double-blind, placebo-controlled clinical trial and,  
14  
15 594 despite its small sample size, represents a piece of evidence that only a larger randomized  
16  
17 595 controlled trial can replicate or refute. It is possible to question why DMTs efficacy cannot  
18  
19 596 be emerged out of the data analysis, of the four treatment arms, and in accordance to their  
20  
21 597 published values. We believe that the limited efficacy of the DMTs, the sample size and the  
22  
23 598 statistical adjustments were strong limiting determining factors for such an indication to be  
24  
25 599 countable. An additional argument is that the efficacy reported for the analysis of pre-  
26  
27 600 treatment (24 months before entry baseline) versus on-trial ARR could be considered as  
28  
29 601 potentially biased due to differences of how relapses were defined during the course of a  
30  
31 602 study compared to pre-treatment period; or due to regression to the mean or placebo effect.  
32  
33 603 This analysis was performed as an additional exploratory analysis that we were able to do due  
34  
35 604 to the availability of data. The relapses of the two pre-treatment years were drawn out of the  
36  
37 605 patients' archival records by the same treating neurologist involved in the study (MP), and  
38  
39 606 according to the patients' hospitalization date for receiving intravenous methyl-prednisolone.  
40  
41 607 This analysis was not used as a primary or a secondary end-point under investigation  
42  
43 608 although it is usually reported by many clinical studies. As a matter of fact many early phase  
44  
45 609 trials are based only on such an analysis (before versus after treatment results). In almost all  
46  
47 610 MS trials the number of relapses within the two years before baseline is a factor under  
48  
49 611 adjustment for the statistical analyses.<sup>48</sup> The inclusion of the post-hoc MRI analysis is another  
50  
51 612 limiting factor that needs attention since it was used as an additional aside exploratory  
52  
53  
54  
55  
56  
57  
58  
59  
60

1  
2  
3 613 approach (due to study budget limitations it was not possible to be used as a formal  
4  
5 614 endpoint); but the MRI evaluation was blinded and can be considered as representative of the  
6  
7 615 randomized subjects within the treatment arms. As far as the regression to the mean and the  
8  
9 616 placebo effect concerns we believe that the 6-month normalization period is an accountable  
10  
11 617 and valuable eliminating factor of the possible effect; as well as the presence of four groups,  
12  
13 618 where only the PLP10 treatment arm is associated with statistically significant efficacy versus  
14  
15 619 placebo. It is a placebo-controlled study after all.  
16  
17  
18  
19

20  
21 621 Our observations are consistent with the idea that simultaneous availability of specific PUFA  
22  
23 622 along with other major membrane and myelin building blocks in combination with specific  
24  
25 623 antioxidants, within optimum quantity, quality, ratio and structural form can possibly result to  
26  
27 624 a more appropriate holistic therapy reducing MS disease activity. This is probably succeeded  
28  
29 625 through synergistic and/or simultaneous effect on the interactions and dynamics of the most  
30  
31 626 probable environmental and biological disease causing factors that induce complex biological  
32  
33 627 network of events for disease pathogenesis and evolution; as well as on the protective and  
34  
35 628 reparative mechanisms. We can additionally speculate that the nature of the intervention  
36  
37 629 formula cannot be prohibitive for its use as preventive regimen and does not preclude  
38  
39 630 probable positive efficacy on the other types of MS, but has to be further investigated. A  
40  
41 631 larger size multicenter clinical trial will better establish PLP10 place in the armamentarium of  
42  
43 632 treatments for MS.  
44  
45  
46

47 633

48  
49 634 It is commonly accepted that nutrition is one of the possible environmental factors involved  
50  
51 635 in the pathogenesis of MS, but its role as complementary MS treatment is unclear and largely  
52  
53 636 disregarded.<sup>57</sup> It is well known that the majority of the patients suffering from MS they do  
54  
55 637 use dietary supplements for a variable length of time and they prefer supplement type of  
56  
57  
58  
59  
60

1  
2  
3 638 “help” over conventional drugs.<sup>58</sup> Dietary antioxidants and fatty acids may influence the  
4  
5 639 disease process in MS by reducing immune-mediated inflammation, oxidative stress and  
6  
7 640 excitotoxic damage.<sup>11</sup> Present data reveal that healthy dietary molecules have a pleiotropic  
8  
9 641 role and are able to change cell metabolism from anabolism to catabolism and down-regulate  
10  
11 642 inflammation by interacting with enzymes, nuclear receptors and transcriptional factors.<sup>57</sup>  
12  
13  
14 643 The present study, for the first time provides strong link evidence between dietary, metabolic,  
15  
16 644 immunological, and neurobiological aspects of MS after three quarters of a century of  
17  
18 645 unsuccessful scientific efforts. This might probably be the beginning of opening new  
19  
20  
21 646 horizons and new avenues in the approach of MS prevention and treatment, and possibly of  
22  
23 647 other multifactorial chronic diseases, including neurodegenerative and autoimmune as well.  
24  
25 648  
26  
27 649  
28  
29 650  
30  
31 651  
32  
33 652  
34  
35 653  
36  
37 654  
38  
39 655  
40  
41 656  
42  
43 657  
44  
45 658  
46  
47 659  
48  
49 660  
50  
51 661  
52  
53 662  
54  
55  
56  
57  
58  
59  
60

1.  
Treatment Arms

| A                                                                                                                                                                                                                        | B (PLP10)                                                                                                                                                                                                                                                    | C                                                                                                                            | Placebo                                         |
|--------------------------------------------------------------------------------------------------------------------------------------------------------------------------------------------------------------------------|--------------------------------------------------------------------------------------------------------------------------------------------------------------------------------------------------------------------------------------------------------------|------------------------------------------------------------------------------------------------------------------------------|-------------------------------------------------|
| <b>Intervention:</b><br>EPA (1,650mg) / DHA (4,650mg) / GLA (2,000mg) / LA (3,850mg) / total other omega-3 (600mg)* / total MUFA** (1,714mg) + total SFA (18:0 160mg, 16:0 650mg) / vitamin A (0.6mg) / vitamin E (22mg) | <b>Intervention:</b><br>EPA (1,650mg) / DHA (4,650mg) / GLA (2,000mg) / LA (3,850mg) / total other omega-3 (600mg)* / total MUFA** (1,714mg) + total SFA (18:0 160mg, 16:0 650mg) / vitamin A (0.6mg) / vitamin E (22mg) + pure $\gamma$ -tocopherol (760mg) | <b>Intervention:</b><br>pure $\gamma$ -tocopherol (760mg) dispersed in pure virgin olive oil (16,137 mg) as delivery vehicle | <b>Intervention:</b><br>Olive oil (pure virgin) |

\* Other omega-3: C18:3n-3 37mg, C18:4n-3 73mg, C20:4n-3 98mg, C22:5n-3 392mg  
 \*\* MUFA: 18:1 1300mg, 20:1 250mg, 22:1 82mg, 24:1 82mg

EPAX1050, EPAX AS, Aalesund, Norway; was used as the source for the omega-3 PUFA, as re-esterified glycerides from fish body oils; Borage seed oil (organic, cold pressed) “Borago officinalis” Goerlich Pharma International GmbH, Edling, Germany, was used as the source for the omega-6 PUFA, MUFA and SFA, as triglycerides. The pure  $\gamma$ -tocopherol was purchased from Tama Biochemical Co. Ltd., Shinjuku-ku Tokyo, Japan; vitamin A as beta-carotene from HealthAid Ltd., Middlesex, United Kingdom and the Citrus aroma from Givaudan Schwaiz AG, Dubendorf, Switzerland.

**Table 1.** Intervention ingredients per treatment arm. Citrus-aroma was used as masking agent of the taste and odor and added in each one of the intervention for a total of 19.5ml dosage of solution per day.

663  
664  
665  
666  
667  
668  
669  
670  
671  
672  
673

| <b>2A.</b>                                 |                   |                    |                   |                   |              |
|--------------------------------------------|-------------------|--------------------|-------------------|-------------------|--------------|
| Characteristics                            | Group A<br>(n=20) | Group B†<br>(n=20) | Group C<br>(n=20) | Placebo<br>(n=20) | P-<br>value  |
| <b>Sex</b>                                 |                   |                    |                   |                   |              |
| Female - no. (%)                           | 15 (75)           | 15 (75)            | 15 (75)           | 15 (75)           | <b>1.000</b> |
| <b>Age (yr)</b>                            |                   |                    |                   |                   |              |
| Mean ± Standard Deviation (SD)             | <b>38.0±11.9</b>  | <b>36.9±8.4</b>    | <b>37.7±8.7</b>   | <b>38.1±10.9</b>  | <b>0.982</b> |
| Median (Range)                             | 38.0 (22–65)      | 37.0 (25–61)       | 36.5 (24–54)      | 36.0 (21–58)      |              |
| <b>Treatment history</b>                   |                   |                    |                   |                   |              |
| Patients on DMT- no. (%)                   | 11 (55)           | 9 (45)             | 12 (60)           | 10 (50)           | <b>0.875</b> |
| <b>Pre-treatment disease duration (yr)</b> |                   |                    |                   |                   |              |
| Mean ± SD                                  | <b>9.0±7.6</b>    | <b>8.6±4.8</b>     | <b>8.6±5.3</b>    | <b>7.7±5.7</b>    | <b>0.909</b> |
| Median (Range)                             | 7.5 (2–37)        | 8.0 (2–20)         | 8.0 (3–24)        | 6.5 (2–25)        |              |
| <b>Pre-treatment relapses‡</b>             |                   |                    |                   |                   |              |
| Mean ± SD                                  | <b>2.33±1.68</b>  | <b>2.41±1.73</b>   | <b>2.31±1.66</b>  | <b>2.10±1.32</b>  | <b>0.946</b> |
| Median (Range)                             | 2.0 (1–6)         | 2.0 (1–7)          | 2.0 (1–6)         | 2.0 (1–4)         |              |
| ARR                                        | <b>1.17</b>       | <b>1.21</b>        | <b>1.16</b>       | <b>1.05</b>       | <b>0.946</b> |
| Patients -% with ≤1 relapse                | 40                | 45                 | 40                | 35                |              |
| <b>Baseline EDSS score‡</b>                |                   |                    |                   |                   |              |
| Mean ± SD                                  | <b>2.52±1.23</b>  | <b>2.15±1.05</b>   | <b>2.42±1.21</b>  | <b>2.39± 0.93</b> | <b>0.775</b> |
| Median (Range)                             | 2.5 (1.0–5.5)     | 2.0 (1.0–4.0)      | 2.5 (0.0–5.0)     | 2.5 (1.0–4.0)     |              |
| <b>2B.</b>                                 |                   |                    |                   |                   |              |
| Characteristics                            | Group A<br>(n=10) | Group B†<br>(n=10) | Group C<br>(n=9)  | Placebo<br>(n=12) | P-<br>value  |
| <b>Sex</b>                                 |                   |                    |                   |                   |              |
| Female - no. (%)                           | 5 (50)            | 7 (70)             | 6 (66.6)          | 10 (83.3)         | <b>0.419</b> |
| <b>Age (yr)</b>                            |                   |                    |                   |                   |              |
| Mean ± SD                                  | <b>36.6±13.5</b>  | <b>34.80±5.4</b>   | <b>40.9±8.1</b>   | <b>39.8±13.2</b>  | <b>0.572</b> |
| Median (Range)                             | 34.5 (22–65)      | 34.5 (26–43)       | 40.0 (29–54)      | 37.5 (21–58)      |              |
| <b>Treatment history</b>                   |                   |                    |                   |                   |              |
| Patients on DMT- no. (%)                   | 6 (60)            | 4 (40)             | 6 (67)            | 6 (50)            | <b>0.949</b> |
| <b>Pre-treatment disease duration (yr)</b> |                   |                    |                   |                   |              |
| Mean ± SD                                  | <b>9.7±10.0</b>   | <b>8.3±5.3</b>     | <b>11.3±6.1</b>   | <b>8.7± 7.1</b>   | <b>0.807</b> |
| Median (Range)                             | 7.5 (2–37)        | 8.0 (2–20)         | 8.0 (4–24)        | 5.5 (2–25)        |              |
| <b>Pre-treatment relapses</b>              |                   |                    |                   |                   |              |

|                                                                                                             |               |               |               |               |       |
|-------------------------------------------------------------------------------------------------------------|---------------|---------------|---------------|---------------|-------|
| Mean ± SD                                                                                                   | 2.20±1.47     | 2.70±1.25     | 1.78±0.66     | 1.67±1.37     | 0.241 |
| Median (Range)                                                                                              | 2.0 (1 – 6)   | 2.5 (1 – 4)   | 2.0 (1 – 3)   | 1.5 (1 – 4)   |       |
| ARR                                                                                                         | 1.10          | 1.35          | 0.89          | 0.83          |       |
| Patients -% with ≤1 relapse                                                                                 | 30            | 20            | 33            | 50            |       |
| <b>Baseline EDSS score</b>                                                                                  |               |               |               |               |       |
| Mean ± SD                                                                                                   | 2.65±1.37     | 2.40±1.12     | 2.11±1.02     | 2.16±0.96     | 0.698 |
| Median (Range)                                                                                              | 3.0 (1.0–5.5) | 2.5 (1.0–4.0) | 2.0 (1.0–4.0) | 2.0 (1.0–3.5) |       |
| † PLP10 group                                                                                               |               |               |               |               |       |
| ‡ Available data at Entry Baseline (n=18 for group A, n=17 for group B, n=19 for group C, n=19 for group D) |               |               |               |               |       |

**Table 2.** The table section 2A reports the demographics and baseline disease characteristics for total randomized population by treatment arm.

The table section 2B reports the demographics and baseline disease characteristics of all-time on-study population by treatment arm. There were no significant between study-group differences at baseline for any characteristic.

674

675

676

677

678

679

680

681

682

683

684

685

686

687

1  
2  
3  
4  
5  
6  
7  
8  
9  
10  
11  
12  
13  
14  
15  
16  
17  
18  
19  
20  
21  
22  
23  
24  
25  
26  
27  
28  
29  
30  
31  
32  
33  
34  
35  
36  
37  
38  
39  
40  
41  
42  
43  
44  
45  
46  
47  
48  
49  
50  
51  
52  
53  
54  
55  
56  
57  
58  
59  
60

| <b>3A.</b>                                                                                                                                                                                                    |                   |              |                    |              |                  |              |                   |              |
|---------------------------------------------------------------------------------------------------------------------------------------------------------------------------------------------------------------|-------------------|--------------|--------------------|--------------|------------------|--------------|-------------------|--------------|
| Characteristics                                                                                                                                                                                               | Group A<br>(N=10) |              | Group B†<br>(N=10) |              | Group C<br>(N=9) |              | Placebo<br>(N=12) |              |
| End Point                                                                                                                                                                                                     | X                 | Y            | X                  | Y            | X                | Y            | X                 | Y            |
| Total No. of relapses                                                                                                                                                                                         | 22                | 17           | 27                 | 8            | 16               | 13           | 20                | 25           |
| <b>Annual Relapse Rate (ARR)</b>                                                                                                                                                                              | <b>1.10</b>       | <b>0.85</b>  | <b>1.35</b>        | <b>0.40</b>  | <b>0.88</b>      | <b>0.72</b>  | <b>0.83</b>       | <b>1.04</b>  |
| <b>% Reduction Compared to Placebo (primary endpoint) (Ys)¶</b>                                                                                                                                               |                   | <b>-18</b>   |                    | <b>-62</b>   |                  | <b>-30</b>   |                   | <b>N/A</b>   |
| <b>P Value against placebo</b>                                                                                                                                                                                |                   | <b>0.468</b> |                    | <b>0.024</b> |                  | <b>0.578</b> |                   |              |
| <b>ARR change -% (Y to X)¶</b>                                                                                                                                                                                |                   | <b>-23</b>   |                    | <b>-70</b>   |                  | <b>-18</b>   |                   | <b>+25</b>   |
| <b>P value against baseline</b>                                                                                                                                                                               |                   | <b>0.425</b> |                    | <b>0.003</b> |                  | <b>0.578</b> |                   | <b>0.500</b> |
| X: Total number of relapses of 24 months pre-treatment (baseline)<br>Y: Total number of relapses of 24 months on-treatment<br>¶ Unadjusted estimate                                                           |                   |              |                    |              |                  |              |                   |              |
| <b>3B.</b>                                                                                                                                                                                                    |                   |              |                    |              |                  |              |                   |              |
| <b>Excluding patients on natalizumab</b>                                                                                                                                                                      | Group A<br>(N=9)  |              | Group B†<br>(N=10) |              | Group C<br>(N=9) |              | Placebo<br>(N=10) |              |
| End Point                                                                                                                                                                                                     | X                 | Y            | X                  | Y            | X                | Y            | X                 | Y            |
| Total No. of relapses                                                                                                                                                                                         | 16                | 15           | 27                 | 8            | 16               | 13           | 13                | 19           |
| <b>Annual Relapse Rate (ARR)</b>                                                                                                                                                                              | <b>0.88</b>       | <b>0.83</b>  | <b>1.35</b>        | <b>0.40</b>  | <b>0.88</b>      | <b>0.72</b>  | <b>0.65</b>       | <b>0.95</b>  |
| <b>% Reduction Compared to Placebo (primary endpoint) (Ys)¶</b>                                                                                                                                               |                   | <b>-13</b>   |                    | <b>-58</b>   |                  | <b>-24</b>   |                   | <b>N/A</b>   |
| <b>P Value against placebo</b>                                                                                                                                                                                |                   | <b>0.493</b> |                    | <b>0.016</b> |                  | <b>0.412</b> |                   |              |
| <b>ARR change -% (Y to X)¶</b>                                                                                                                                                                                |                   | <b>-6</b>    |                    | <b>-70</b>   |                  | <b>-18</b>   |                   | <b>+46</b>   |
| <b>P value against baseline</b>                                                                                                                                                                               |                   | <b>0.857</b> |                    | <b>0.003</b> |                  | <b>0.578</b> |                   | <b>0.354</b> |
| X: Total number of relapses of 24 months pre-treatment (baseline)<br>Y: Total number of relapses of 24 months on-treatment<br>† PLP10 group<br>¶ Unadjusted estimate                                          |                   |              |                    |              |                  |              |                   |              |
| <b>Table 3.</b> The table section 3A reports the two year primary end points of ARR of all-time on-study population by treatment arm and percent difference with placebo. During the 24mo period on-treatment |                   |              |                    |              |                  |              |                   |              |

1  
2  
3 the ARR of the group A was 0.85 with 18% decrease compared to placebo (p=0.468), of PLP10 group  
4 0.40 with 62% decrease (p=0.024), and of group C 0.72 with 30% decrease (p=0.578) and reports the  
5 comparison of the 24mo pre-treatment ARR (baseline ARR) to 24mo on-treatment ARR of all-time on-  
6 study population including patients on natalizumab.  
7  
8  
9  
10

11  
12  
13  
14 The table section 3B reports comparison of the 24mo pre-treatment ARR to 24mo on-treatment ARR of  
15 all-time on-study population excluding patients on natalizumab; and the comparison of the ARR during  
16 the 24mo period on-treatment (primary end point) between each one of the groups against placebo.  
17  
18  
19  
20

21 688

22 689

23 690

24 691

25 692

26 693

27 694

28 695

29 696

30 697

31 698

32 699

33 700

34 701

35 702

36 703

37 704

38 705

39

40

41

42



**4A.**

| Characteristics                  | Group A<br>(N=8) |             | Group B†<br>(N=7) |             | Group C<br>(N=10) |             | Placebo<br>(N=7) |             |
|----------------------------------|------------------|-------------|-------------------|-------------|-------------------|-------------|------------------|-------------|
|                                  | X                | Y           | X                 | Y           | X                 | Y           | X                | Y           |
| No. of Relapses                  | 20               | 14          | 14                | 14          | 27                | 26          | 20               | 13          |
| <b>Annual Relapse Rate (ARR)</b> | <b>1.25</b>      | <b>0.88</b> | <b>1.00</b>       | <b>1.00</b> | <b>1.35</b>       | <b>1.30</b> | <b>1.42</b>      | <b>0.92</b> |

X: Total number of relapses of 24 months pre-treatment

Y: Total number of relapses of 24 months on-treatment

**4B.**

| Characteristics                                         | Group A<br>(N=20) |             | Group B†<br>(N=20) |             | Group C<br>(N=20) |             | Placebo<br>(N=20) |             |
|---------------------------------------------------------|-------------------|-------------|--------------------|-------------|-------------------|-------------|-------------------|-------------|
|                                                         | X                 | Y           | X                  | Y           | X                 | Y           | X                 | Y           |
| End Point                                               | X                 | Y           | X                  | Y           | X                 | Y           | X                 | Y           |
| No. of Relapses                                         | 45                | 34          | 49                 | 30          | 46                | 41          | 43                | 41          |
| <b>Annual Relapse Rate (ARR)</b>                        | <b>1.13</b>       | <b>0.85</b> | <b>1.23</b>        | <b>0.75</b> | <b>1.15</b>       | <b>1.03</b> | <b>1.08</b>       | <b>1.03</b> |
| ARR Reduction -% (Y to X)¶                              | -25               |             | -39                |             | -10               |             | -5                |             |
| <b>P value against baseline</b>                         | <b>0.120</b>      |             | <b>0.005</b>       |             | <b>0.475</b>      |             | <b>0.652</b>      |             |
| <b>% Reduction of the ARR Compared to Placebo (Ys)¶</b> | <b>-18</b>        |             | <b>-27</b>         |             | <b>0.0</b>        |             | <b>N/A</b>        |             |
| <b>P Value against placebo</b>                          | <b>0.447</b>      |             | <b>0.121</b>       |             | <b>0.996</b>      |             |                   |             |

X: Total number of relapses of 24 months pre-treatment (baseline)

Y: Total number of relapses of 24 months on-treatment

¶ Unadjusted estimate

† PLP10 group

**Table 4.** The table section 4A reports the two year primary end point of relapses based on study design as reported by drop-out patients by Treatment Arm. The most drop-out patients that went on disease modified therapy (DMT) were from the group A and placebo with three and two patients respectively on natalizumab. These parameters justify the decreased number of relapses recorded within group A and placebo drop-outs; and this could affect the ITT analysis in favor of placebo when the total two-year recorded data are used. For PLP10 group, 14 relapses were reported at baseline and remained the same during the two-year study. For placebo, 20 relapses were reported at baseline and decreased to 13 during the two-

1  
2  
3 year study. This is expected since, for PLP10 group 43% of the drop-outs were under DMT at  
4 entry baseline and remained the same until the end of the study with no patient on  
5 natalizumab; but 57% of the placebo group drop-outs that were under DMT at entry baseline  
6 increased to 86% at the end of the study including two patients on natalizumab.  
7  
8  
9  
10

11  
12  
13  
14 The table section 4B reports comparison of 24 months pre-treatment ARR (baseline) to 24  
15 months on-treatment ARR of total randomized population, by treatment arm. The ARR of  
16 PLP10 group was 1.23 at baseline and 0.75 at the end of the study (39% reduction  $p=0.005$ ),  
17 and for placebo 1.08 at baseline and 1.03 at the end of the study (5% reduction  $p=0.652$ ). No  
18 statistical difference was calculated for the other two treatment arms. During the 24 months  
19 on-treatment, PLP10 group presented a 27% reduction of ARR versus placebo ( $p=0.121$ ),  
20 with all groups without statistically significant results.  
21  
22  
23  
24  
25  
26  
27  
28  
29

706

707

708

709

710

711

712

713

714

| <b>5.</b>                                                                                                            |                   |                            |                  |                    |                                      |
|----------------------------------------------------------------------------------------------------------------------|-------------------|----------------------------|------------------|--------------------|--------------------------------------|
| Characteristics*                                                                                                     | Group A<br>(n=10) | Group B<br>PLP10<br>(n=10) | Group C<br>(n=9) | Placebo<br>(n=12)  | P-value<br>Group<br>B vs.<br>Placebo |
| Annual relapse rate over 1 year**                                                                                    | <b>0.80</b>       | <b>0.40</b>                | <b>0.78</b>      | <b>0.83</b>        |                                      |
| Total number of relapses**                                                                                           | 8                 | 4                          | 7                | 10                 |                                      |
| <b>Primary end points</b>                                                                                            |                   |                            |                  |                    |                                      |
| Annual relapse rate over 2 years (95% CI)**                                                                          | 0.85              | <b>0.40 (0.15-0.87)</b>    | 0.72             | <b>1.04</b>        | <b>0.024</b>                         |
| Total number of relapses**                                                                                           | 17                | 8                          | 13               | 25                 |                                      |
| <b>Excluding patients on natalizumab</b>                                                                             |                   |                            |                  |                    |                                      |
| Annual relapse rate over 2 years (95% CI)                                                                            | 0.83              | <b>0.40 (0.10-0.79)</b>    | 0.72             | <b>0.95</b>        | <b>0.016</b>                         |
| Total number of relapses                                                                                             | 15                | <b>8</b>                   | 13               | <b>19</b>          |                                      |
| <b>Secondary end points</b>                                                                                          |                   |                            |                  |                    |                                      |
| Cumulative probability of sustained progression increase by 1 point on EDSS confirmed after 6 mo, over 2 years -% ** | 43                | <b>10 (1/10)</b>           | 24               | <b>58 (7/12)</b>   | <b>0.019</b>                         |
| <b>Excluding patients on natalizumab</b>                                                                             |                   |                            |                  |                    |                                      |
| cumulative probability of sustained progression increase by 1 point on EDSS confirmed after 6 mo, over 2 years -%    | 33                | <b>10 (1/10)</b>           | 24               | <b>70 (7/10)</b>   | <b>0.006</b>                         |
| <b>Exploratory Results</b>                                                                                           |                   |                            |                  |                    |                                      |
| Patients proportion with ≤1 relapse over 2 years -% **                                                               | 50 (5/10)         | <b>90 (9/10)</b>           | 56 (5/9)         | <b>42 (5/12)</b>   | <b>0.030</b>                         |
| <b>MRI</b>                                                                                                           |                   |                            |                  |                    |                                      |
| Patients proportion with new or enlarging T2 lesions-% **                                                            | ----              | <b>29 (2/7)</b>            | ----             | <b>67 (4/6)</b>    |                                      |
| <b>Excluding patients on natalizumab</b>                                                                             |                   |                            |                  |                    |                                      |
| Patients proportion with no new or enlarging T2 lesions-%                                                            | ----              | <b>29 (2/7)</b>            | ----             | <b>80 (4/5)</b>    |                                      |
| <b>DMT (interferons, glatiramer acetate) and natalizumab</b>                                                         |                   |                            |                  |                    |                                      |
| Patients proportion on DMT and natalizumab at the end of 2 years-% **                                                | 80 (8/10)†        | <b>60 (6/10)</b>           | 67 (6/9)         | <b>75 (9/12) ‡</b> | <b>0.747</b>                         |
| * CI denotes confidence interval.                                                                                    |                   |                            |                  |                    |                                      |
| ** Including patients on natalizumab                                                                                 |                   |                            |                  |                    |                                      |
| † 1 out of 10 on natalizumab                                                                                         |                   |                            |                  |                    |                                      |
| ‡ 2 out of 12 on natalizumab                                                                                         |                   |                            |                  |                    |                                      |

**Table 5.** Clinical end points, according to study group for all-time on-study population.

715

1  
2  
3 716 Acknowledgments: We thank all participant patients. We thank Thyrsos Posporis MD and the  
4  
5 717 central reading centre (Ayios Therissos Medical Diagnostic Centre, Nicosia, Cyprus), and  
6  
7 718 Eleni Eracleous, MD (neuroradiologist) for the contribution on the MRI scans and their team  
8  
9 719 for the MRI reading. Special thanks to Elena Kkolou the pharmacist involved in the study and  
10  
11 720 Eftychia Gaglia for her nursing contribution and collection of blood from the patients. We  
12  
13 721 also thank Demetris Hadjisofoklis and Ioanna Leontiou (University of Nicosia, Helix  
14  
15 722 Business incubator) for their contribution on randomization process, data collection, filing  
16  
17 723 and blind codes keeping. Additionally we would like to thank the CING for hosting the  
18  
19 724 project. Moreover, we thank the Cyprus Ministry of Commerce, Industry and Tourism for  
20  
21 725 funding the project; and Yasoo Health Ltd., for providing some of the raw materials in  
22  
23 726 exchange of investigating, on their behalf, the efficacy and safety of  $\gamma$ -tocopherol.  
24  
25  
26  
27  
28

29 727  
30 728 Contributors: All authors interpreted the data. I.S.P drafted the report and figures and all  
31  
32 729 authors critically revised and approved the final version. M.C.P and I.S.P were responsible  
33  
34 730 for the protocol and study design. M.C.P was the evaluator of patients' clinical progress signs  
35  
36 731 and the treatment physician. I.S.P and G.N.L were involved in the non-pharmacologic  
37  
38 732 treatment-related care. I.S.P performed the literature search and both I.S.P and G.N.L  
39  
40 733 contributed on the intervention formulation and composition rational. I.S.P supervised the  
41  
42 734 composition procedure of the interventions and the fatty acid profile analysis of the red blood  
43  
44 735 cell membranes. E.E.N and I.S.P performed the statistical analyses. E.E.N was an  
45  
46 736 independent scientist. All authors vouch for the accuracy and completeness of the data and  
47  
48 737 the statistical analyses.  
49  
50  
51  
52  
53  
54  
55  
56  
57  
58  
59  
60

1  
2  
3 739 Funding: Supported by a grand from the Cyprus Ministry of Commerce, Industry and  
4  
5 740 Tourism, program for the creation of new high technology and innovation enterprises through  
6  
7 741 the business incubator.  
8

9  
10 742

11 743 Competing interest: M.C.P, G.N.L, I.S.P received grand support from the Cyprus Ministry of  
12  
13 744 Commerce, Industry and Tourism, Program for the Creation of New High Technology and  
14  
15 745 Innovation Enterprises through the Business Incubator. PALUPA Medical Ltd. is a research  
16  
17 746 company formed and registered for completion of the study, as required by the Governments'  
18  
19 747 funding grand program. M.C.P, G.N.L, I.S.P, and CING are all stockholders of the PALUPA  
20  
21 748 Medical Ltd. M.C.P is an employee at the CING. I.S.P is a senior research collaborator  
22  
23 749 hosted by the CING. G.N.L is a CING collaborator. E.E.N declares no-competing interest.  
24  
25  
26

27 750 No pharmaceutical companies were involved in this phase II clinical trial. The intervention is  
28  
29 751 under a USA provisional patent; Application Number 61469081.  
30  
31

32 752

33  
34 753 Ethical approval: Cyprus National bioethics committee (reference EEBK/EII/2005/10).  
35

36 754

37  
38 755 All authors have completed the Unified Competing Interest form at  
39  
40 756 [www.icmje.org/coi\\_disclosure.pdf](http://www.icmje.org/coi_disclosure.pdf) (available on request from the corresponding author) and  
41  
42 757 declare that (1) M.C.P, G.N.L, I.S.P have support from Cyprus Ministry of Commerce,  
43  
44 758 Industry and Tourism, Program for the Creation of New High Technology and Innovation  
45  
46 759 Enterprises through the Business Incubator for the submitted work; (2) E.E.N has no  
47  
48 760 relationships with Cyprus Ministry of Commerce, Industry and Tourism, or PLUPA Medical  
49  
50 761 Ltd. that might have an interest in the submitted work in the previous 3 years; (3) their  
51  
52 762 spouses, partners, or children have no financial relationships that may be relevant to the  
53  
54  
55  
56  
57  
58  
59  
60

1  
2  
3 763 submitted work; and (4) E.E.N has a non-financial interests that may be relevant to the  
4  
5 764 submitted work.  
6  
7  
8  
9

10  
11  
12  
13  
14  
15  
16  
17  
18  
19  
20  
21  
22  
23  
24  
25  
26  
27  
28  
29  
30  
31  
32  
33  
34  
35  
36  
37  
38  
39  
40  
41  
42  
43  
44  
45  
46  
47  
48  
49  
50  
51  
52  
53  
54  
55  
56  
57  
58  
59  
60

765

766 The Corresponding Author has the right to grant on behalf of all authors and does grant on  
767 behalf of all authors, an exclusive license on a worldwide basis to the BMJ Publishing Group  
768 Ltd and its Licensees to permit this article (if accepted) to be published in BMJ editions and  
769 any other BMJ PGL products and sublicences to exploit all subsidiary rights, as set out in our  
770 licence ( <http://resources.bmj.com/bmj/authors/checklists-forms/licence-for-publication>)."  
771

## Article Summary

### Article focus:

- The increasing prevalence of Multiple Sclerosis (MS), the limited efficacy and the side effects of the existing treatments urge the clinical need for the development of new, innovative, more effective, safe, and preventive treatment strategies.
- For the first time we propose three original nutraceutical treatment intervention-cocktails, formulated based on systems medicine through nutritional systems biology rational; with PLP10 representing the complete composition of the formulation and the other two treatments represent partial formulations.
- We have studied the proposed interventions on 80 relapsing remitting MS patients (four groups of 20 each) for a total of 42 months, in a randomized, double-blind, placebo-controlled, phase II proof-of-concept clinical trial.

**Key messages:**

- The per-protocol data analyses indicated that PLP10 is associated with significant efficacy versus placebo on both reducing the annualized relapse rate and disease progression without any adverse or severe side effects.
- PLP10 has probably the ability to interfere with the total known repertoire of mechanisms involved in MS pathogenesis as well as with the recovery mechanisms, neuroprotection and remyelination.; it is potentially able to manipulate global perturbed networks of the disease causing factors rather than focusing only on unique failing components.
- This proof-of-concept clinical study might be indicative and the beginning of new avenues in MS prevention and treatment and of new epoch of novel drug development with dynamic therapeutic potential for chronic complex multifactorial diseases.

**Strengths and limitations of this study:**

- The strength of this study is the systems medicine therapeutic approach, the length of the study the inclusion of the six months normalization (chronotherapy) period, and the study protocol following all indicated appropriate guidelines with definite inclusion/exclusion criteria and primary/secondary end points.
- The sample size and the high rate of drop-outs (palatability of the formula) are the limitations associated with the present study.
- A phase III multi-center clinical trial will establish the present intervention regime among the best choices among neurodegenerative diseases prophylaxis and MS treatment drugs faretra.

772

773 **References**

- 774 1. Baranzini SE, Oksenberg JR, Hauser SL. New insights into the genetics of multiple  
775 sclerosis. *Journal of Rehabilitation Research and Development* 2002;39:201-210.
- 776 2. Goni J, Esteban FJ, de Mendizabal NV, et al. A computational analysis of protein-  
777 protein interaction networks in neurodegenerative diseases. *BMC Syst Biol*  
778 2008;2:52.
- 779 3. Lobo I. Multifactorial inheritance and genetic disease. *Nature Education* 2008; 1.
- 780 4. Compston A, Coles A. Multiple sclerosis. *Lancet* 2002;359:1221.
- 781 5. Evans PH. Free radicals in brain metabolism and pathology. *British Medical Bulletin*  
782 1993;49:577-587.
- 783 6. Knight J. Reactive oxygen species and the neurodegenerative disorders. *Ann Clin Lab*  
784 *Sci* 1997;27:11-25.
- 785 7. Matute C, Alberdi E, Domercq M, Pérez-Cerdá F, Pérez-Samartín A, Sánchez-Gómez  
786 MV. The link between excitotoxic oligodendroglial death and demyelinating diseases.  
787 *Trends in Neurosciences* 2001;24:224-230.
- 788 8. Owens T. The enigma of multiple sclerosis: inflammation and neurodegeneration  
789 cause heterogeneous dysfunction and damage. *Current Opinion in Neurology*  
790 2003;16:259-265.
- 791 9. Smith KJ, Kapoor R, Felts PA. Demyelination: The role of reactive oxygen and  
792 nitrogen species. *Brain Pathology* 1999;9:69-92.
- 793 10. Ahn AC, Tewari M, Poon C-S, Phillips RS. The Clinical Applications of a Systems  
794 Approach. *PLoS Med* 2006;3:e209.
- 795 11. van Meeteren ME, Teunissen CE, Dijkstra CD, van Tol EAF. Antioxidants and  
796 polyunsaturated fatty acids in multiple sclerosis. *Eur J Clin Nutr* 2005;59:1347-1361.



- 1  
2  
3 797 12. Calder PC. n-3 Polyunsaturated fatty acids, inflammation, and inflammatory diseases.  
4  
5 798 The American Journal of Clinical Nutrition 2006;83:S1505-1519S.  
6  
7 799 13. Piani D, Fontana A. Involvement of the cystine transport system xc- in the  
8  
9 800 macrophage- induced glutamate-dependent cytotoxicity to neurons. The Journal of  
10  
11 801 Immunology 1994;152:3578-3585.  
12  
13  
14 802 14. Youdim KA, Martin A, Joseph JA. Essential fatty acids and the brain: possible health  
15  
16 803 implications. International Journal of Developmental Neuroscience 2000;18:383-399.  
17  
18 804 15. Calder PC. Dietary modification of inflammation with lipids. Proceedings of the  
19  
20 805 Nutrition Society 2002;61:345-358.  
21  
22  
23 806 16. Gil Á. Polyunsaturated fatty acids and inflammatory diseases. Biomedecine &  
24  
25 807 Pharmacotherapy 2002;56:388-396.  
26  
27 808 17. Ariel A, Serhan CN. Resolvins and protectins in the termination program of acute  
28  
29 809 inflammation. Trends in Immunology 2007;28:176-183.  
30  
31  
32 810 18. Arita M, Ohira T, Sun Y-P, Elangovan S, Chiang N, Serhan CN. Resolvin E1  
33  
34 811 selectively interacts with leukotriene B4 receptor BLT1 and chemR23 to regulate  
35  
36 812 inflammation. The Journal of Immunology 2007;178:3912-3917.  
37  
38 813 19. Janakiram NB, Rao CV. Role of Lipoxins and Resolvins as Anti-Inflammatory and  
39  
40 814 Proresolving Mediators in Colon Cancer. Current Molecular Medicine 2009;9:565-  
41  
42 815 579.  
43  
44  
45 816 20. Serhan C, Arita M, Hong S, Gotlinger K. Resolvins, docosatrienes, and  
46  
47 817 neuroprotectins, novel omega-3-derived mediators, and their endogenous aspirin-  
48  
49 818 triggered epimers. Lipids 2004;39:1125-1132.  
50  
51  
52 819 21. Serhan CN, Chiang N, Van Dyke TE. Resolving inflammation: dual anti-  
53  
54 820 inflammatory and pro-resolution lipid mediators. Nat Rev Immunol 2008;8:349-361.  
55  
56  
57  
58  
59  
60

- 1  
2  
3 821 22. Rossetti RG, Seiler C, DeLuca P, Laposata M, Zurier R. Oral administration of  
4  
5 822 unsaturated fatty acids: effects on human peripheral blood T lymphocyte proliferation.  
6  
7 823 Journal of Leukocyte Biology 1997;62:438-443.  
8  
9  
10 824 23. Vatassery G. Vitamin E and other endogenous antioxidants in the central nervous  
11  
12 825 system. Geriatrics 1998a;53:S25–S27.  
13  
14 826 24. Fukuzawa K, Gebicki JM. Oxidation of [alpha]-tocopherol in micelles and liposomes  
15  
16 827 by the hydroxyl, perhydroxyl, and superoxide free radicals. Archives of Biochemistry  
17  
18 828 and Biophysics 1983;226:242-251.  
19  
20  
21 829 25. Christen S, Woodall AA, Shigenaga MK, Southwell-Keely PT, Duncan MW, Ames  
22  
23 830 BN.  $\gamma$ -Tocopherol traps mutagenic electrophiles such as NO<sub>x</sub> and complements  $\alpha$ -  
24  
25 831 tocopherol: Physiological implications. Proceedings of the National Academy of  
26  
27 832 Sciences of the United States of America 1997;94:3217-3222.  
28  
29  
30 833 26. Brigelius-Flohé R, Kelly FJ, Salonen JT, Neuzil J, Zingg J-M, Azzi A. The European  
31  
32 834 perspective on vitamin E: current knowledge and future research. The American  
33  
34 835 Journal of Clinical Nutrition 2002;76:703-716.  
35  
36 836 27. Calder P. Polyunsaturated fatty acids, inflammatory processes and inflammatory  
37  
38 837 bowel diseases Mol Nutr Food Res 2008;52:885–897  
39  
40  
41 838 28. Edwards IJ, O'Flaherty JT. Omega-3 Fatty Acids and PPAR $\gamma$  in Cancer. PPAR  
42  
43 839 Research 2008;2008:1-15.  
44  
45 840 29. Groeger AL, Cipollina C, Cole MP, et al. Cyclooxygenase-2 generates anti-  
46  
47 841 inflammatory mediators from omega-3 fatty acids. Nat Chem Biol 2010;6:433-441.  
48  
49  
50 842 30. Dyall SC, Michael GJ, Michael-Titus AT. Omega-3 fatty acids reverse age-related  
51  
52 843 decreases in nuclear receptors and increase neurogenesis in old rats. Journal of  
53  
54 844 Neuroscience Research 2010;88:2091-2102.  
55  
56  
57  
58  
59  
60

- 1  
2  
3 845 31. McNamara RK. DHA Deficiency and Prefrontal Cortex Neuropathology in Recurrent  
4  
5 846 Affective Disorders. *The Journal of Nutrition* 2010;140:864-868.  
6  
7 847 32. Salvati S, Natali F, Attorri L, et al. Eicosapentaenoic acid stimulates the expression of  
8  
9 848 myelin proteins in rat brain. *Journal of Neuroscience Research* 2008;86:776-784.  
10  
11 849 33. Abraham M, Shapiro S, Karni A, Weiner HL, Miller A. Gelatinases (MMP-2 and  
12  
13 850 MMP-9) are preferentially expressed by Th1 vs. Th2 cells. *Journal of*  
14  
15 851 *Neuroimmunology* 2005;163:157-164.  
16  
17  
18 852 34. C ffrench-Constant. Pathogenesis of multiple sclerosis. *The Lancet* 1994;343:271-  
19  
20 853 275.  
21  
22  
23 854 35. Leppert D, Lindberg RLP, Kappos L, Leib SL. Matrix metalloproteinases:  
24  
25 855 multifunctional effectors of inflammation in multiple sclerosis and bacterial  
26  
27 856 meningitis. *Brain Research Reviews* 2001;36:249-257.  
28  
29 857 36. Curtis CL, Rees SG, Cramp J, et al. Effects of n-3 fatty acids on cartilage metabolism.  
30  
31 858 *Proceedings of the Nutrition Society* 2002;61:381-389.  
32  
33  
34 859 37. Harris MA, Hansen RA, Vidsudhiphan P, et al. Effects of conjugated linoleic acids  
35  
36 860 and docosahexaenoic acid on rat liver and reproductive tissue fatty acids,  
37  
38 861 prostaglandins and matrix metalloproteinase production. *Prostaglandins, Leukotrienes*  
39  
40 862 *and Essential Fatty Acids* 2001;65:23-29.  
41  
42  
43 863 38. McCabe A, Wallace J, Gilmore W, Strain J, McGlynn H. The effect of  
44  
45 864 eicosapentanoic acid on matrix metalloproteinase gene expression. *Lipids*  
46  
47 865 1999;34:S217-S218.  
48  
49 866 39. Shinto L, Marracci G, Bumgarner L, Yadav V. The Effects of Omega-3 Fatty Acids  
50  
51 867 on Matrix Metalloproteinase-9 Production and Cell Migration in Human Immune  
52  
53 868 Cells: Implications for Multiple Sclerosis. *Autoimmune Diseases* 2011;2011.

- 1  
2  
3 869 40. Auffray C, Chen Z, Hood L. Systems medicine: the future of medical genomics and  
4  
5 870 healthcare. *Genome Med* 2009;1:2.  
6  
7 871 41. Huang WL, King VR, Curran OE, et al. A combination of intravenous and dietary  
8  
9 872 docosahexaenoic acid significantly improves outcome after spinal cord injury. *Brain*  
10  
11 873 2007;130:3004-3019.  
12  
13 874 42. Marangoni F, Angeli MT, Colli S, et al. Changes of n – 3 and n – 6 fatty acids in  
14  
15 875 plasma and circulating cells of normal subjects, after prolonged administration of 20:5  
16  
17 876 (EPA) and 22:6 (DHA) ethyl esters and prolonged washout. *Biochimica et Biophysica*  
18  
19 877 *Acta (BBA) - Lipids and Lipid Metabolism* 1993;1210:55-62.  
20  
21 878 43. Martínez M, Vázquez E, García-Silva MT, et al. Therapeutic effects of  
22  
23 879 docosahexaenoic acid ethyl ester in patients with generalized peroxisomal disorders1.  
24  
25 880 *The American Journal of Clinical Nutrition* 2000;71:376S-385S.  
26  
27 881 44. Committee for medicinal products for human use. Guideline on clinical trials in small  
28  
29 882 populations In: *European Medicines Agency, 2006: 1-10.*  
30  
31 883 45. Gerard E Dallal. *The Little Handbook of Statistical Practice*. [online]. Available at  
32  
33 884 URL|. Accessed Date Accessed, Year|.  
34  
35 885 46. Wang YC, Meyerson L, Tang YQ, Qian N. Statistical methods for the analysis of  
36  
37 886 relapse data in MS clinical trials. *Journal of the Neurological Sciences* 2009;285:206-  
38  
39 887 211.  
40  
41 888 47. Polman CH, O'Connor PW, Havrdova E, et al. A randomized, placebo-controlled trial  
42  
43 889 of natalizumab for relapsing multiple sclerosis. *The New England Journal of*  
44  
45 890 *Medicine* 2006;354:899-910.  
46  
47 891 48. Kappos L, Radue E-W, O'Connor P, et al. A Placebo-Controlled Trial of Oral  
48  
49 892 Fingolimod in Relapsing Multiple Sclerosis. *New England Journal of Medicine*  
50  
51 893 2010;362:387-401.  
52  
53  
54  
55  
56  
57  
58  
59  
60

- 1  
2  
3 894 49. Cunnane S, Ho S, Dore-Duffy P, Ells K, Horrobin D. Essential fatty acid and lipid  
4  
5 895 profiles in plasma and erythrocytes in patients with multiple sclerosis. *The American*  
6  
7 896 *Journal of Clinical Nutrition* 1989;50:801-806.  
8  
9  
10 897 50. Harbige LS, Sharief MK. Polyunsaturated fatty acids in the pathogenesis and  
11  
12 898 treatment of multiple sclerosis. *British Journal of Nutrition* 2007;98:S46-S53.  
13  
14 899 51. Wilson R, Tocher D. Lipid and fatty acid composition is altered in plaque tissue from  
15  
16 900 multiple sclerosis brain compared with normal brain white matter. *Lipids* 1991;26:9-  
17  
18 901 15.  
19  
20  
21 902 52. Rafat AS, Saame RS, Laura AS, Heidi RY, William S, Gary PZ. Omega 3-Fatty  
22  
23 903 Acids: Health Benefits and Cellular Mechanisms of Action. *Mini Reviews in*  
24  
25 904 *Medicinal Chemistry* 2004;4:859-871.  
26  
27 905 53. Shaikh SR, Edidin M. Polyunsaturated fatty acids, membrane organization, T cells,  
28  
29 906 and antigen presentation. *The American Journal of Clinical Nutrition* 2006;84:1277-  
30  
31 907 1289.  
32  
33  
34 908 54. Lajtha A, Toth J, Fujimoto K, Agrawal CH. Turnover of Myelin Proteins in Mouse  
35  
36 909 Brain in vivo. *Biochem J* 1977;164:323-329.  
37  
38 910 55. LeBaron FN, Sanyal S, Jungalwala FB. Turnover rate of molecular species of  
39  
40 911 sphingomyelin in rat brain. *Neurochemical Research* 1981;6:1081-1089.  
41  
42 912 56. Yao JK. Increased polyunsaturated fatty acids in developing and regenerating  
43  
44 913 peripheral nerve. *Biochimica et Biophysica Acta (BBA) - Lipids and Lipid*  
45  
46 914 *Metabolism* 1982;712:542-546.  
47  
48  
49 915 57. Riccio P. The molecular basis of nutritional intervention in multiple sclerosis: a  
50  
51 916 narrative review. *Complement Ther Med* 2011;19:228-237.  
52  
53 917 58. Farinotti M, Simi S, Di Pietrantonj C, McDowell N, et al. Dietary interventions for  
54  
55 918 multiple sclerosis (Review), the Cochrane Library 2007, issue I.  
56  
57  
58  
59  
60

1  
2  
3 919 **Figure legends**  
4  
5

6 920 **Figure 1.** Omega-6 and omega-3 PUFA, their respective metabolic derivatives and their  
7  
8 921 possible effects on inflammation.

9  
10  
11 922 After consumption, the PUFAs are metabolized via several pathways (not shown) to active  
12  
13 923 compounds that mediate inflammation and products that promote resolution of inflammation.

14  
15  
16  
17 924 Abbreviations: PL, phospholipid; IFN- $\gamma$ , interferon  $\gamma$ ; IL-2, interleukin 2; NF $\kappa$ B, nuclear  
18  
19 925 factor kappa B; PGE<sub>2</sub>, prostaglandin E<sub>2</sub>; PPAR $\gamma$ , peroxisome proliferator-activated receptor  
20  
21 926  $\gamma$ ; PUFAs, polyunsaturated fatty acids; TGF $\beta$ , transforming growth factor  $\beta$ ; TNF, tumor  
22  
23 927 necrosis factor; COX, cyclooxygenase; hydroxyeicosatetraenoic acid; HPETE,  
24  
25 928 hydroperoxyeicosatetraenoic acid; LOX, lipoxygenase; LT, leukotriene; PG, prostaglandin;  
26  
27 929 TX, thromboxane; RXR- $\gamma$ , retinoid X receptor-gamma; Nrf2, nuclear respiratory factor;  
28  
29 930 MMP, metalloproteinase.  
30  
31  
32

33  
34 931 **Figure 2.** Study Flowchart

35  
36  
37 932 **Figure 3.** Panel A demonstrates the ARR of all-time on-study patients during the 24mo pre-  
38  
39 933 treatment (baseline ARR) and at different on-study intervals (6, 12, 18, 24 mo) per treatment  
40  
41 934 arm. \*\*

42  
43  
44 935 Panel B demonstrates the ARR of all-time on-study population between 0-6, 6-12, 6-18, and  
45  
46 936 6-24 mo period intervals, of PLP10 vs. placebo group. \*\*

47  
48  
49 937 Panel C demonstrates the ARR of all-time on-study population of PLP10 vs. placebo group at  
50  
51 938 baseline, during 1<sup>st</sup> year, and during the 2-year on-treatment. \*\*

52  
53  
54  
55 939 Panel D demonstrates the dispersion of relapses throughout the 2-year period of all-time on-  
56  
57 940 study (excluding patients on natalizumab) of PLP10 (n=10) vs. placebo (n=10). Placebo  
58  
59  
60

1  
2  
3 941 shows an irregular dispersion of relapses in relation to PLP10 group with linear increasing  
4  
5 942 trend while PLP10 shows a stabilized linear trend. By using the per-protocol model where  
6  
7 943 patients on natalizumab were excluded, we could compare the number of relapses on a same  
8  
9 944 number of patients.

10  
11  
12  
13 945 \*\* Including the patients on natalizumab.

14  
15  
16 946 **Figure 4.** Panel 4A demonstrates the Kaplan–Meier plot of the time to sustained progression  
17  
18 947 of disability among all-time on-study patients, excluding patients on natalizumab, receiving  
19  
20 948 intervention A, PLP10 and C as compared with placebo. PLP10 reduced the risk of sustained  
21  
22 949 progression of disability by 86% over two years (p=0.006). Intervention formula A reduced  
23  
24 950 the risk of sustained progression of disability by 53% (p=0.266) and intervention formula C  
25  
26 951 by 67% (p=0.061).

27  
28  
29  
30 952 Panel 4B demonstrates the Kaplan–Meier plot of the time to sustained progression of  
31  
32 953 disability among ITT population receiving intervention A, PLP10 and C as compared with  
33  
34 954 placebo. PLP10 reduced the risk of sustained progression of disability by 71% over two years  
35  
36 955 (p=0.052, trend). Intervention formula A reduced the risk of sustained progression of  
37  
38 956 disability by 22% (p=0.727) and intervention formula C by 40% (p=0.447).

39  
40  
41 957 **Figure 5.** Mean change in expanded disability status scale score as a function of visit  
42  
43 958 number. Values are expressed as mean ± s.e.m.

44  
45  
46  
47 959 ¶ Including patients on natalizumab

48  
49  
50 960 ¶¶ Excluding patients on natalizumab

51  
52  
53 961  
54  
55  
56  
57  
58  
59  
60

1 **A novel oral nutraceutical formula (PLP10) for the**  
2 **treatment of relapsing remitting multiple sclerosis: a**  
3 **randomized, double-blind, placebo-controlled proof-of-**  
4 **concept clinical trial**

5 **Marios C. Pantzaris, George N. Loukaides, Evangelia E. Ntzani, Ioannis S.**  
6 **Patrikios**

7 The Cyprus Institute of Neurology and Genetics (CING) 1683 Nicosia, Cyprus Marios C.  
8 Pantzaris Senior Consultant Neurologist Neurology Clinic C and PALUPA Medical Ltd., The  
9 Cyprus Institute of Neurology and Genetics (CING) 1683 Nicosia, Cyprus George N.  
10 Loukaides Clinical Dietitian/Nutritionist Neurology Clinic and PALUPA Medical Ltd.,  
11 University of Ioannina School of Medicine (UISM) 45110 Ioannina, Greece Evangelia E.  
12 Ntzani Assistant Professor Clinical and Molecular Epidemiology Unit, Department of  
13 Hygiene and Epidemiology, PALUPA Medical Ltd at The Cyprus Institute of Neurology and  
14 Genetics (CING) 1683 Nicosia, Cyprus Ioannis S. Patrikios Senior Research Scientist,  
15 visiting Professor at European University Cyprus Nicosia, Cyprus, Department of Health and  
16 Science. Correspondence should be addresses to e-mail: [I.Patrikios@euc.ac.cy](mailto:I.Patrikios@euc.ac.cy) or  
17 [pantzari@cing.ac.cy](mailto:pantzari@cing.ac.cy)

18  
19 **Correspondence to:**

20 **Ioannis Patrikios**

21 The Cyprus Institute of Neurology and Genetics (CING)  
22 Neurology Clinic C (PALUPA Medical),



1  
2  
3 23 6 International Airport Av.  
4  
5 24 P.O.Box 23462, 1683 Ayios Dometios. Nicosia, Cyprus  
6  
7 25 Tel: +357 22 358 600, +357 99 097 856;  
8  
9  
10 26 [i.patrikios@euc.ac.cy](mailto:i.patrikios@euc.ac.cy)  
11  
12 27 [patrikiosioannis@gmail.com](mailto:patrikiosioannis@gmail.com)  
13  
14  
15

16 29 **AND**  
17  
18  
19  
20  
21

22 31 **Marios Pantzaris**

23  
24 32 The Cyprus Institute of Neurology and Genetics (CING)  
25  
26 33 Neurology Clinic C (PALUPA Medical),  
27  
28 34 6 International Airport Av.  
29  
30 35 P.O.Box 23462, 1683 Ayios Dometios, Nicosia Cyprus  
31  
32 36 Tel: +357 22 358 600;  
33  
34 37 [pantzari@cing.ac.cy](mailto:pantzari@cing.ac.cy)  
35  
36  
37  
38

39 39 **Keywords:** antioxidant vitamins, polyunsaturated fatty acids, multiple sclerosis, systems  
40 40 medicine, randomized clinical trial.  
41  
42  
43  
44  
45

46 42 **Word Count: 6415**  
47  
48  
49  
50  
51  
52  
53  
54  
55  
56  
57  
58  
59  
60

1  
2  
3 **Abstract**  
4

5 **Objective** To assess whether our three novel interventions, formulated based on systems  
6  
7  
8  
9  
10  
11  
12  
13  
14  
15  
16  
17  
18  
19  
20  
21  
22  
23  
24  
25  
26  
27  
28  
29  
30  
31  
32  
33  
34  
35  
36  
37  
38  
39  
40  
41  
42  
43  
44  
45  
46  
47  
48  
49  
50  
51  
52  
53  
54  
55  
56  
57  
58  
59  
60  
61  
62  
63  
64  
65  
66  
67  
68  
69  
70  
71  
72  
73  
74  
75  
76  
77  
78  
79  
80  
81  
82  
83  
84  
85  
86  
87  
88  
89  
90  
91  
92  
93  
94  
95  
96  
97  
98  
99  
100  
101  
102  
103  
104  
105  
106  
107  
108  
109  
110  
111  
112  
113  
114  
115  
116  
117  
118  
119  
120  
121  
122  
123  
124  
125  
126  
127  
128  
129  
130  
131  
132  
133  
134  
135  
136  
137  
138  
139  
140  
141  
142  
143  
144  
145  
146  
147  
148  
149  
150  
151  
152  
153  
154  
155  
156  
157  
158  
159  
160  
161  
162  
163  
164  
165  
166  
167  
168  
169  
170  
171  
172  
173  
174  
175  
176  
177  
178  
179  
180  
181  
182  
183  
184  
185  
186  
187  
188  
189  
190  
191  
192  
193  
194  
195  
196  
197  
198  
199  
200  
201  
202  
203  
204  
205  
206  
207  
208  
209  
210  
211  
212  
213  
214  
215  
216  
217  
218  
219  
220  
221  
222  
223  
224  
225  
226  
227  
228  
229  
230  
231  
232  
233  
234  
235  
236  
237  
238  
239  
240  
241  
242  
243  
244  
245  
246  
247  
248  
249  
250  
251  
252  
253  
254  
255  
256  
257  
258  
259  
260  
261  
262  
263  
264  
265  
266  
267  
268  
269  
270  
271  
272  
273  
274  
275  
276  
277  
278  
279  
280  
281  
282  
283  
284  
285  
286  
287  
288  
289  
290  
291  
292  
293  
294  
295  
296  
297  
298  
299  
300  
301  
302  
303  
304  
305  
306  
307  
308  
309  
310  
311  
312  
313  
314  
315  
316  
317  
318  
319  
320  
321  
322  
323  
324  
325  
326  
327  
328  
329  
330  
331  
332  
333  
334  
335  
336  
337  
338  
339  
340  
341  
342  
343  
344  
345  
346  
347  
348  
349  
350  
351  
352  
353  
354  
355  
356  
357  
358  
359  
360  
361  
362  
363  
364  
365  
366  
367  
368  
369  
370  
371  
372  
373  
374  
375  
376  
377  
378  
379  
380  
381  
382  
383  
384  
385  
386  
387  
388  
389  
390  
391  
392  
393  
394  
395  
396  
397  
398  
399  
400  
401  
402  
403  
404  
405  
406  
407  
408  
409  
410  
411  
412  
413  
414  
415  
416  
417  
418  
419  
420  
421  
422  
423  
424  
425  
426  
427  
428  
429  
430  
431  
432  
433  
434  
435  
436  
437  
438  
439  
440  
441  
442  
443  
444  
445  
446  
447  
448  
449  
450  
451  
452  
453  
454  
455  
456  
457  
458  
459  
460  
461  
462  
463  
464  
465  
466  
467  
468  
469  
470  
471  
472  
473  
474  
475  
476  
477  
478  
479  
480  
481  
482  
483  
484  
485  
486  
487  
488  
489  
490  
491  
492  
493  
494  
495  
496  
497  
498  
499  
500  
501  
502  
503  
504  
505  
506  
507  
508  
509  
510  
511  
512  
513  
514  
515  
516  
517  
518  
519  
520  
521  
522  
523  
524  
525  
526  
527  
528  
529  
530  
531  
532  
533  
534  
535  
536  
537  
538  
539  
540  
541  
542  
543  
544  
545  
546  
547  
548  
549  
550  
551  
552  
553  
554  
555  
556  
557  
558  
559  
560  
561  
562  
563  
564  
565  
566  
567  
568  
569  
570  
571  
572  
573  
574  
575  
576  
577  
578  
579  
580  
581  
582  
583  
584  
585  
586  
587  
588  
589  
590  
591  
592  
593  
594  
595  
596  
597  
598  
599  
600  
601  
602  
603  
604  
605  
606  
607  
608  
609  
610  
611  
612  
613  
614  
615  
616  
617  
618  
619  
620  
621  
622  
623  
624  
625  
626  
627  
628  
629  
630  
631  
632  
633  
634  
635  
636  
637  
638  
639  
640  
641  
642  
643  
644  
645  
646  
647  
648  
649  
650  
651  
652  
653  
654  
655  
656  
657  
658  
659  
660  
661  
662  
663  
664  
665  
666  
667  
668  
669  
670  
671  
672  
673  
674  
675  
676  
677  
678  
679  
680  
681  
682  
683  
684  
685  
686  
687  
688  
689  
690  
691  
692  
693  
694  
695  
696  
697  
698  
699  
700  
701  
702  
703  
704  
705  
706  
707  
708  
709  
710  
711  
712  
713  
714  
715  
716  
717  
718  
719  
720  
721  
722  
723  
724  
725  
726  
727  
728  
729  
730  
731  
732  
733  
734  
735  
736  
737  
738  
739  
740  
741  
742  
743  
744  
745  
746  
747  
748  
749  
750  
751  
752  
753  
754  
755  
756  
757  
758  
759  
760  
761  
762  
763  
764  
765  
766  
767  
768  
769  
770  
771  
772  
773  
774  
775  
776  
777  
778  
779  
780  
781  
782  
783  
784  
785  
786  
787  
788  
789  
790  
791  
792  
793  
794  
795  
796  
797  
798  
799  
800  
801  
802  
803  
804  
805  
806  
807  
808  
809  
810  
811  
812  
813  
814  
815  
816  
817  
818  
819  
820  
821  
822  
823  
824  
825  
826  
827  
828  
829  
830  
831  
832  
833  
834  
835  
836  
837  
838  
839  
840  
841  
842  
843  
844  
845  
846  
847  
848  
849  
850  
851  
852  
853  
854  
855  
856  
857  
858  
859  
860  
861  
862  
863  
864  
865  
866  
867  
868  
869  
870  
871  
872  
873  
874  
875  
876  
877  
878  
879  
880  
881  
882  
883  
884  
885  
886  
887  
888  
889  
890  
891  
892  
893  
894  
895  
896  
897  
898  
899  
900  
901  
902  
903  
904  
905  
906  
907  
908  
909  
910  
911  
912  
913  
914  
915  
916  
917  
918  
919  
920  
921  
922  
923  
924  
925  
926  
927  
928  
929  
930  
931  
932  
933  
934  
935  
936  
937  
938  
939  
940  
941  
942  
943  
944  
945  
946  
947  
948  
949  
950  
951  
952  
953  
954  
955  
956  
957  
958  
959  
960  
961  
962  
963  
964  
965  
966  
967  
968  
969  
970  
971  
972  
973  
974  
975  
976  
977  
978  
979  
980  
981  
982  
983  
984  
985  
986  
987  
988  
989  
990  
991  
992  
993  
994  
995  
996  
997  
998  
999  
1000

**Design** 30-month randomized double-blind, placebo-controlled, parallel design, phase II proof-of-concept clinical study.

**Settings** Cyprus Institute of Neurology and Genetics (CING)

**Participants and Interventions** 80 subjects were randomized into four groups of 20. The first intervention (A) was composed of omega-3 and omega-6 polyunsaturated fatty acids at 1:1 wt/wt. Specifically, the omega-3 fatty acids were docosahexaenoic acid (DHA) and eicosapentaenoic acid (EPA) at 3:1 wt/wt and the omega-6 fatty acids were linoleic acid (LA) and gamma ( $\gamma$ )-linolenic acid (GLA) at 2:1 wt/wt. This intervention also included minor quantities of other specific polyunsaturated, monounsaturated and specific saturated fatty acids as well as vitamin A and vitamin E (alpha-tocopherol). The third intervention (C) was  $\gamma$ -tocopherol alone. The second intervention (PLP10) was a combination of A and C. A fourth group of 20 received a vehicle placebo. The interventions were administered per os once daily.

**Main outcome measures** The primary endpoint was the annualized relapse rate (ARR) of the three interventions versus placebo at two years. The secondary end point was the time to confirmed disability progression at two years.

1  
2  
3 72 **Results** The per-protocol, proof-of-concept, analysis demonstrated a 64% adjusted relative  
4  
5 73 reduction in ARR at two years for PLP10 versus placebo (P=0.024). Regarding the secondary  
6  
7 74 endpoint, a relative reduction of 86% in the risk of sustained progression of disability was  
8  
9  
10 75 observed within the PLP10 group (p=0.047). No adverse events were reported. Interventions  
11  
12 76 A and C showed no significant efficacy.  
13  
14  
15  
16  
17

18 78 **Conclusions** PLP10 treatment significantly reduced the ARR, and the risk of sustained  
19 79 disability progression without any adverse or severe side effects.  
20  
21  
22

23 81 **Trial registration** International Standard Randomized Controlled Trial, number  
24  
25 82 ISRCTN87818535.  
26  
27  
28  
29  
30  
31  
32  
33  
34  
35  
36  
37  
38  
39  
40  
41  
42  
43  
44  
45  
46  
47  
48  
49  
50  
51  
52  
53  
54  
55  
56  
57  
58  
59  
60

## 92 Introduction

93 Multiple sclerosis (MS) is a complex multifactorial disease that results from interplay  
94 between as yet unidentified environmental factors and susceptibility genes.<sup>1-3</sup> Together, these  
95 factors trigger a cascade of events, involving engagement of the immune system,  
96 inflammatory injury of myelin, axons and glia, functional recovery and structural repair,  
97 gliosis, and neurodegeneration.<sup>4</sup> The bio-mechanisms involved are: immune-mediated  
98 inflammation, oxidative stress and excitotoxicity.<sup>5-9</sup> These mechanisms may all contribute to  
99 oligodendrocyte and neuronal damage and even cell death, hence promoting disease  
100 progression. The increasing prevalence of MS, the limited efficacy and the side effects of the  
101 existing treatments urge the clinical need for the development of new, innovative, more  
102 effective, safe, and preventive treatment strategies.

103  
104 Research has shown that multiple variables dynamically interact and many different complex  
105 interrelated processes are simultaneously orchestrated for MS pathogenesis. The fundamental  
106 distinctiveness of **systems medicine (SM)** is not just the recognition that different specific  
107 complex factors are important in disease management, but that they need to be incorporated  
108 in some meaningful way to treatment selection and delivery.<sup>10</sup> The primary challenge tackled  
109 by systems scientific approach is the elucidation of how these multiple variables dynamically  
110 interact and how one can apply this understanding to affect the system and achieve a  
111 desirable end.<sup>10</sup> The answer might be the simultaneous interference with all involved  
112 perturbed mechanisms, by using a cocktail of different specific ingredients, potentially able  
113 through synergistic effect to give a long, holistic and effective treatment (Supplementary  
114 Information Methods 1).

115

1  
2  
3 116 The polyunsaturated fatty acids (PUFA) composition of membrane phospholipids plays a  
4  
5 117 direct role in immune and non-immune related inflammation. PUFA and antioxidant  
6  
7 118 deficiencies along with decreased cellular antioxidant defense mechanisms have been  
8  
9 119 reported for MS patients.<sup>11</sup> The cause of these PUFA deficiencies is not entirely clear and may  
10  
11 120 involve metabolic and nutritional alterations.<sup>11</sup>  
12  
13  
14 121

15  
16 122 Increased or uncontrolled inflammation contributes to several different acute and chronic  
17  
18 123 diseases and it is characterized by the production of inflammatory cytokines, arachidonic acid  
19  
20 124 (AA)-derived eicosanoids (prostaglandins (PGs), thromboxanes (TXs), leukotrienes (LTs),  
21  
22 125 and other oxidized derivatives), other inflammatory agents such as reactive oxygen species  
23  
24 126 (ROS), nitric oxide (NO), and adhesion molecules (Fig 1).<sup>12</sup> During inflammation glutamate  
25  
26 127 homeostasis is altered by activated immune cells releasing increased quantities of glutamate  
27  
28 128 that can result in over activation of glutamate receptors and in return excitotoxic  
29  
30 129 oligodendroglial death.<sup>7, 13</sup> As such, among others, membrane-related pathology, immune-  
31  
32 130 mediated inflammation, oxidative stress and excitotoxicity provide potentially useful  
33  
34 131 combined targets for intervention in MS.  
35  
36  
37 132

38  
39  
40 133 *In vitro and in vivo* studies have demonstrated that dietary EPA, DHA, LA, and GLA can be  
41  
42 134 implicated and modulate almost all known complex network of events and pathways  
43  
44 135 repertoire in MS pathophysiology. Brain membrane fatty acid composition can be modified  
45  
46 136 with dietary supplementation, but the process has been showed to be age dependent (it takes  
47  
48 137 much longer in adults versus developing brains) as well as possibly dependent on the  
49  
50 138 quantities of the dietary/supplemented PUFAs.<sup>14</sup> Both human and animal studies proved that  
51  
52 139 diets high in DHA and EPA increase the proportion of these PUFA in the membranes of  
53  
54 140 inflammatory cells and reduce the levels of AA.<sup>12, 15</sup> The anti-inflammatory properties of  
55  
56  
57  
58  
59  
60

1  
2  
3 141 omega-3 include production of PGs and TXs of the 3-series and LTs of the 5-series (Fig 1).<sup>14</sup>  
4  
5 142 <sup>16</sup> Resolvins and protectins are biosynthesized from omega-3 fatty acids via cyclooxygenase-  
6  
7 143 2/lipoxygenase (COX-2/LOX) pathways and they promote control of inflammation in neural  
8  
9 144 tissues (Fig 1).<sup>17-21</sup> T-cell proliferation in acute and chronic inflammation can be reduced by  
10  
11 145 supplementation with either omega-6 or omega-3 PUFA.<sup>22</sup> Furthermore, vitamin E is an  
12  
13 146 important antioxidant that can interrupt the propagation of free radical chain reactions.<sup>23</sup>  
14  
15 147 Vitamin E (alpha-tocopherol, an isoform of vitamin E) efficiently detoxifies hydroxyl,  
16  
17 148 perhydroxyl and superoxide free radicals.<sup>24</sup> However  $\gamma$ -tocopherol (another isoform of  
18  
19 149 vitamin E) seems to be more efficiently implicated in trapping NO radicals.<sup>25</sup> In addition  
20  
21 150 alpha-tocopherol exerts non-antioxidant properties, including modulation of cell signaling  
22  
23 151 and immune function, regulation of transcription, and induction of apoptosis.<sup>26</sup>  
24  
25  
26 152  
27  
28  
29 153 Moreover, omega-3 fatty acids electrophilic derivatives formed by COX-2, in activated  
30  
31 154 macrophages can stimulate the nuclear respiratory factor (Nrf2) inducing the transcription of  
32  
33 155 neuroprotective and antioxidant related genes, and can activate the peroxisome proliferator-  
34  
35 156 activated receptor (PPAR) $\gamma$  for anti-inflammatory response.<sup>27-29</sup> In animal studies, EPA and  
36  
37 157 DHA proved to be endogenous ligands of RXRs, with positive effect on neurogenesis.<sup>30</sup>  
38  
39 158 Additionally, in 2008 Salvati and coworkers reported evidense of accelerated myelination in  
40  
41 159 DHA- and EPA-treated animals.<sup>32</sup> Moreover, DHA and EPA are reported to significantly  
42  
43 160 decrease the levels of metalloproteinases (MMP) -2, -3, -9, and -13 with a significant role in  
44  
45 161 the migration of lymphocytes into the CNS by inducing disruption of the blood brain barrier  
46  
47 162 (BBB), an important step in the formation of MS lesions.<sup>33-39</sup>  
48  
49  
50  
51 163  
52  
53 164 Based on the above, specific PUFA and antioxidant vitamins fulfill the criterion of biologic  
54  
55 165 plausibility and have the potential to diminish MS symptoms severity and activity, even  
56  
57  
58  
59  
60

1  
2  
3 166 promoting recovery (remyelination).<sup>11</sup> Overall, PLP10 includes multiple ingredients  
4  
5 167 interacting with key interconnected components within functional network modules, each  
6  
7 168 contributing a fraction of the effects of perturbations that cause the disease.<sup>40</sup>  
8  
9

10 169

11  
12 170 In our phase II, single-center, randomized, double-blind, placebo-controlled, proof-of-  
13  
14 171 concept clinical trial we intended to evaluate the therapeutic ability of PLP10 and of two  
15  
16 172 other interventions (A and C) consisting of PLP10 constituent partial fractions versus  
17  
18 173 placebo, when used on RRMS patients.  
19

20  
21 174

22  
23 175

## 24 25 176 **Methods**

### 26 27 177 **Patients**

28  
29  
30 178 Eligibility criteria were an age of 18 to 65; a diagnosis of RRMS according to the McDonald  
31  
32 179 criteria; a score of 0.0 to 5.5 on the EDSS, a rating that ranges from 0 to 10, with higher  
33  
34 180 scores indicating more severe disability; MRI showing lesions consistent with MS; and at  
35  
36 181 least one documented clinical relapse either receiving or not disease modifying treatment  
37  
38 182 (DMT) within the 24 months period before beginning (enrollment) of the study. Patients were  
39  
40 183 excluded because of a recent (<30 days) relapse, prior immunosuppressant or monoclonal  
41  
42 184 antibodies therapy, pregnancy or nursing, other severe disease compromising organ function,  
43  
44 185 progressive MS, history of recent drug or alcohol abuse, use of any additional food  
45  
46 186 supplement, vitamin, or any form of PUFA, history of severe allergic or anaphylactic  
47  
48 187 reactions or known specific nutritional hypersensitivity. No monitor or limitations on  
49  
50 188 patients' daily diet habits were included in the study design since the quantities of the  
51  
52 189 ingredients within the formulas daily-dosage could not be significantly affected or spoiled by  
53  
54  
55  
56  
57  
58  
59  
60

1  
2  
3 190 any confounding factors within any known global daily food diet (see procedures, treatment  
4  
5 191 regimen and end-points).  
6

7 192  
8

9 193 The study was conducted in accordance with the standards of the International Conference of  
10  
11 194 Harmonization Guidelines for Good Clinical Practice. The protocol was developed by the  
12  
13 195 investigators and it was approved by the Cyprus National Bioethics Committee and was  
14  
15 196 overseen by an independent safety-monitoring committee evaluating the safety and over-all  
16  
17 197 benefit-risk profiles. The adherence of care providers with the protocol was assessed by an  
18  
19 198 external committee assigned by the funder of the project through reviews of case report  
20  
21 199 forms. All patients gave written informed consent at the time of enrolment.  
22  
23  
24

25 200  
26

### 27 201 **Randomization and masking**

28  
29 202 Patients were randomly assigned to four intervention groups in a 1:1:1:1 ratio stratified by  
30  
31 203 gender (women to men, 3:1). Randomization was facilitated by a lottery-type pool of  
32  
33 204 numbered balls. Patients were randomly assigned to treatment in blocks of four by flipping a  
34  
35 205 coin as follows: for the first two drawn balls heads stratified them to the groups A/B and tails  
36  
37 206 stratified them to the groups C/D. The other two balls were stratified accordingly. A second  
38  
39 207 toss of the coin assigned the two patients to group A (head)/B (tail) or group C (head)/D  
40  
41 208 (tail). The randomization scheme was generated, performed and securely stored by Helix  
42  
43 209 Incubator Organization of Nicosia University (HIONU).  
44  
45  
46

47 210  
48

49 211 The interventions had identical appearance and smell in dark bottles (15 daily-dose  
50  
51 212 portions/bottle) under nitrogen bed and labeled by HIONU with code numbers, unidentifiable  
52  
53 213 for both patients and investigators. Study data were collected by the investigators and saved  
54  
55 214 by the HIONU that also held the blinded codes of the study. All study personnel involved in  
56  
57  
58  
59  
60



1  
2  
3 215 the conduct of the study were blinded throughout the study. Treating/examining physician,  
4  
5 216 other investigators, pharmacist, neuroradiologist and patients were masked to treatment  
6  
7 217 allocation.  
8  
9

10 218

### 11 219 **Procedures and end points**

12  
13  
14 220 The specific omega-3 (re-esterified glycerides) and omega-6 (glycerides) raw materials were  
15  
16 221 purchased according to the required interventions' PUFA-fraction specification (molecular  
17  
18 222 structure, quantity/ratio and quality) with vitamin E (alpha-tocopherol) used as antioxidant  
19  
20 223 stabilizer by the supplier. The vitamins and masking aroma were purchased separately. The  
21  
22 224 mixing of fractions to the final required intervention-composition specification was always  
23  
24 225 performed by the same team of scientists under the supervision of the involved medical  
25  
26 226 biochemist and lipidology specialist, under appropriate conditions every six months.  
27  
28 227 Interventions were stored refrigerated in dark until use. See **Table 1** and Supplementary  
29  
30 228 Information Methods 1 and 2 for intervention specification detailed description and  
31  
32 229 study/intervention rational.  
33  
34  
35

36 230

37  
38 231 Participants were randomly assigned to receive a daily dose of a mixture of EPA (1,650mg) /  
39  
40 232 DHA (4,650mg) / GLA (2,000mg) / LA (3,850mg) / total other omega-3 (600mg) / total  
41  
42 233 MUFA (1,714mg) + total SFA (18:0 160mg, 16:0 650mg) / vitamin A (0.6mg) / vitamin E  
43  
44 234 (22mg) (intervention A, group A); or composed mixture of pure  $\gamma$ -tocopherol (760mg)  
45  
46 235 dispersed in pure virgin olive oil (16,137 mg) as delivery vehicle (intervention C, group C);  
47  
48 236 or a mixture of intervention formula A with intervention C without the pure virgin olive oil  
49  
50 237 (intervention B, named PLP10, group B); or placebo composed of pure virgin olive oil  
51  
52 238 (16,930mg) (intervention D, group D) (Table 1). Citrus-aroma was used as masking agent of  
53  
54 239 the taste and odor and added in each one of the intervention for a total of 19.5ml dosage of  
55  
56  
57  
58  
59  
60

1  
2  
3 240 solution per day. The institution's pharmacist was responsible for the appropriate storage and  
4  
5 241 handling of the interventions to the individual participants. The interventions were taken  
6  
7 242 orally once daily 30 minutes before dinner by a dosage calibrated cup for 30 months. The  
8  
9 243 ingredients, ratio and dose have been selected based on their biophysical interrelation to the  
10  
11 244 total known multiple MS causing factors, their biochemical importance and the role expected  
12  
13 245 to play in the normalisation and treatment of the involved complex network of events in the  
14  
15 246 disease pathophysiology. Moreover, the high intake dosage was used to overcome any  
16  
17 247 abnormal dietary accumulation of related agents as a result of patients' food intake habits,  
18  
19 248 irrespective of geographical origin, in relation to the daily consumption ratio of the total fatty  
20  
21 249 acid intake; in order to end-up with omega-3 to omega-6 PUFA indicated physiological body  
22  
23 250 ratio composition of 1:1 wt/wt.  
24  
25  
26  
27  
28

29  
30 252 The period beginning from July 1<sup>st</sup> 2007 (enrolment) until December 31<sup>st</sup> 2007 (entry  
31  
32 253 baseline) was used for normalization period. This six-month normalization period would  
33  
34 254 allow the interventions' agents to exert their beneficial effect (for the  
35  
36 255 incorporation/normalization of cell membranes by oral PUFA, since they need four to six  
37  
38 256 months to exert pivotal action on immune and neural cells, correction of antioxidant  
39  
40 257 deficiency and body PUFA, and optimal normalization of EPA and DHA levels/ratio).<sup>41-43</sup>  
41  
42  
43 258 The study was completed on December 31<sup>st</sup> 2009 and the recording of relapses continued  
44  
45 259 until December 31<sup>st</sup> 2010. More clearly the study included the "normalization period" (July  
46  
47 260 1<sup>st</sup> 2007 to Dec 31<sup>st</sup> 2007), the "on treatment" period (Jan 1<sup>st</sup> 2008 to Dec 31<sup>st</sup> 2009) and the  
48  
49 261 12-month "extended period" (Jan 1<sup>st</sup> 2010– Dec 31<sup>st</sup> 2010).  
50  
51  
52

53  
54 263 Depending on their clinical status and in accordance with the ethical issues governing clinical  
55  
56 264 trials participants continued receiving the indicative regular available treatments, according to  
57  
58  
59  
60

1  
2  
3 265 international guidelines with persistent evaluation of any side-effects and adverse events.

4  
5 266 The study was designed to end 30 months after enrolment and clinical assessments were

6  
7 267 scheduled at entry baseline, 3, 9, 15, 21 and 24 months on-treatment. Patients were also

8  
9 268 clinically examined by the treating neurologist within 48 hours after the onset of new or

10  
11 269 recurrent neurologic symptoms.

12  
13  
14 270

15  
16 271 The primary end point was the ARR at two years. A relapse was defined as new or recurrent

17  
18 272 neurologic symptoms not associated with fever or infection that lasted for at least 24 hours

19  
20 273 and accompanied by new neurologic signs. Relapses were treated with methyl-prednisolone

21  
22 274 at a dose of 1g intravenous per day, for three days followed by prednisone orally at a dose of

23  
24 275 1mg/kg of weight per day on a tapering scheme for three weeks. The secondary end point at

25  
26 276 two years was the time to confirmed disability progression, defined as an increase of 1.0 or

27  
28 277 more on EDSS, confirmed after six months (progression could not be confirmed during a

29  
30 278 relapse). The final EDSS score was confirmed six months after the end of the study. A post-

31  
32 279 hoc analysis was performed assessing the proportion of patients free from new or enlarging

33  
34 280 T2 lesions on brain MRI scans at the end of the study for the per-protocol participants of the

35  
36 281 group receiving the highest effective intervention versus placebo. Comparison was made only

37  
38 282 versus the available archival MRI scans up to three months before the enrolment date. MRI

39  
40 283 scans were performed and blindly analyzed at an MRI evaluation centre. The patients

41  
42 284 continued to be followed for additional 12 months after completion of the trial and relapses

43  
44 285 were recorded. Finally, patients were strongly encouraged to remain in the study for follow-

45  
46 286 up assessments even if they had discontinued the study drug.

47  
48  
49  
50  
51 287

52  
53 288 Blood samples were collected from all randomized patients at the time of enrolment, at every

54  
55 289 scheduled clinical assessment and during relapses. To check individual compliance with

56  
57  
58  
59  
60

1  
2  
3 290 intake, the fatty acids composition of patients' red blood cells' membranes was determined,  
4  
5 291 by gas chromatography, according to a standard protocol. The fatty acid analyses were  
6  
7 292 performed after study termination and thus did not influence the blinding.  
8  
9

10 293

11 294 The involved neurologist was experienced with more than 20 years in practice and trained to  
12  
13 295 standardise EDSS scoring procedures, examined patients, made all medical decisions,  
14  
15 296 determined the EDSS score and reviewed adverse or side-effects. The medical biochemist,  
16  
17 297 specialist on lipidology and immunology and the registered clinical dietitian, members of the  
18  
19 298 investigator team were experienced with more than 25 years in practice. Patients were able to  
20  
21 299 contact the neurologist at any time if there was any adverse event, side-effect or allergic  
22  
23 300 reaction. The study drug was not suspected to have any clinical or laboratory adverse effects  
24  
25 301 different from placebo that could disturb the double-blind nature of the trial. Therefore, the  
26  
27 302 same study-neurologist functioned as both the treating and evaluating physician.  
28  
29  
30  
31

32 303

33  
34 304 Safety measures were assessed from the time of enrollment until 12 months following study  
35  
36 305 completion. Haematological and biochemical tests were performed at enrolment and at every  
37  
38 306 12 months, including full blood count, renal and liver function tests, proteins, cholesterol,  
39  
40 307 triglycerides, glucose and electrolytes.  
41  
42

43 308

44  
45 309 The whole procedure followed the clinical trial guidelines as required by the USA Food and  
46  
47 310 Drug Administration, European Medicines Agency, and the Committee for Medicinal  
48  
49 311 Products for Human Use.<sup>44</sup>  
50

51 312

52  
53  
54 313 **Statistical analysis**  
55  
56  
57  
58  
59  
60

1  
2  
3 314 Power calculations could not be done before the study because of the lack of information  
4  
5 315 from previous studies on potential effect sizes. In 2005 the prevalence of MS in Cyprus  
6  
7 316 (600,000 population) was 120/100.000. Based on the aforementioned MS patients' numbers  
8  
9  
10 317 of our country and the centre of reference, the CING, we were able to enrol the 20% of the  
11  
12 318 total RRMS patients eligible for treatment in the trial. Sample size was strictly based on this  
13  
14 319 subjects' availability parameter and the novelty of the assessed intervention.  
15

320

16  
17  
18 321 Baseline characteristics were compared across all intervention groups by ANOVA or  
19  
20 322 Kruskal-Wallis rank test for continuous variables and by mean Fisher's exact test for  
21  
22 323 categorical variables, as appropriate.  
23

324

24  
25  
26  
27 325 For the primary outcome, the ARR was analysed in a pair-wise fashion for the active  
28  
29 326 interventions compared to placebo using negative binomial regression models adjusted for  
30  
31 327 number of relapses within two years before baseline, EDSS score at baseline and DMT. The  
32  
33 328 relapse rate was calculated as the total number of relapses divided by the total number of  
34  
35 329 patient-years followed for each treatment group. ARR differences were also calculated  
36  
37 330 among all comparable parameters and reported as percent difference.  
38

331

39  
40  
41  
42 332 For the secondary end-point outcome, the time to disability progression, Kaplan–Meier  
43  
44 333 curves were constructed. Progression to disability and time thereof was compared in a pair-  
45  
46 334 wise fashion for the active interventions versus placebo by the log-rank test in the main  
47  
48 335 analysis and by Cox proportional-hazards models with adjustment for baseline EDSS score,  
49  
50 336 age and DMT in the supportive analysis. Each test was performed with a significance level of  
51  
52 337 0.05. Multivariate models considered all variables with  $P < 0.1$  on univariate models. There  
53  
54 338 was no overt violation of the proportionality assumption.  
55  
56  
57  
58  
59  
60

1  
2  
3 339  
4  
5 340 Both, per-protocol and intention to treat (ITT) analyses were performed, for different sets of  
6  
7 341 research questions to be answered, and both are reported. Missing data of the five lost to  
8  
9 342 follow patients were imputed by use of the last-observation-carried-forward (LOCF)  
10  
11 343 approach. Due to the proof-of-concept design of the study, the considerable non-adherence  
12  
13 344 rate (49%) and the interpretation issues caused thereof regarding the ITT analysis, the per-  
14  
15 345 protocol analysis considered being more informative and appropriate method approach to  
16  
17 346 answer the research addressed questions of efficacy of the interventions when subjects were  
18  
19 347 continuously following the protocol. All statistical analyses were well defined a priori. All  
20  
21 348 analyses were performed with STATA SE 10.0 (College Station, TX, USA). P-values are  
22  
23 349 two-tailed.  
24  
25  
26  
27  
28  
29

350

### 351 **Role of the funding source**

352 The funders had no role in study design, data collection and analysis, decision to publish, or  
353 preparation of the manuscript. All members of the writing group had full access to all study  
354 data and contributed to its interpretation and prepared, reviewed, and approved the  
355 manuscript for submission. All authors had final responsibility for the decision to submit the  
356 paper for publication.  
357

357

## 358 **Results**

### 359 **Study population**

360 From July 2007 through December 2010 (including the 12-month extended period), a total of  
361 80 MS patients were randomly assigned to a study group at the CING (tertiary neurological  
362 center).  
363

363

1  
2  
3 364 Among the 80 patients, 20 patients were randomly assigned to each of the three groups to  
4  
5 365 receive the interventions and 20 to receive placebo (Fig 2). Baseline characteristics of both  
6  
7 366 the ITT and the per-protocol populations were similar across groups (Table 2A and 2B).  
8  
9 367 Total drop-out patients completed follow-up until study completion and were included in the  
10  
11 368 ITT analyses (Table 4). Five patients were totally lost to follow before their first scheduled  
12  
13 369 visit and two patients dropped-out before their first scheduled visit progressed to secondary  
14  
15 370 progressive MS. Fifteen patients dropped-out without successfully completing the  
16  
17 371 “normalization” period including five pregnancies. Another 17 patients dropped-out early  
18  
19 372 after entry baseline. Seven patients that dropped out were given monoclonal antibody  
20  
21 373 treatment (natalizumab). Overall, a total of 41 (51%) patients completed the 42-month study  
22  
23 374 (July 2007 through December 31<sup>st</sup> 2010, including the 12-month extended period) where one  
24  
25 375 patient from group A and two from the placebo group transferred on natalizumab, and 39  
26  
27 376 (49%) patients either withdrew (drop-out) or lost to follow. Reasons for study-interventions  
28  
29 377 discontinuation are listed in Figure 2.  
30  
31  
32  
33  
34  
35

### 36 379 **Efficacy**

### 38 380 **Relapses**

39  
40 381 As a proof-of-concept trial we primarily needed to answer whether the interventions were  
41  
42 382 effective for those MS patients who adhere to the assigned treatment, the per-protocol  
43  
44 383 analysis.<sup>45</sup> For the sake of methodological comprehensiveness we also present the ITT  
45  
46 384 analysis as a secondary analysis, to answer a different question, complementary to our core  
47  
48 385 hypothesis; like what happened to MS patients who were placed on the interventions (the  
49  
50 386 effect of assignment).<sup>45</sup> Otherwise, as a result of a high drop-out rate, an ITT analysis will not  
51  
52 387 likely be able to show the superiority of an intervention even if it is effective.<sup>45</sup> In any  
53  
54 388 instance, the proper approach of evaluating a study data is to understand what question  
55  
56  
57  
58  
59  
60

1  
2  
3 389 prompted the research and assure that the analysis is appropriate for providing the answer  
4  
5 390 whatever it is called. Both analyses can be performed for a study, using the results from the  
6  
7 391 different analyses to answer different research questions.<sup>45</sup> These interventions are original,  
8  
9 392 composed by a different treatment rational, the SM, never tested before and the important  
10  
11 393 main concern was to evaluate their efficacy and safety based on the per-protocol treated MS  
12  
13 394 patients, without any peripheral noise. The question that had to be answered was: “what  
14  
15 395 happens to the patients that are placed and stick on the specific treatment”.

16  
17  
18  
19 396  
20  
21 397 Regarding the per-protocol analysis, during the first year of treatment, the ARR was 0.80,  
22  
23 398 0.40, 0.78 and 0.83 for the four intervention groups respectively. During the second year, the  
24  
25 399 ARR was 0.90, 0.40, 0.67 and 1.25 for the four intervention groups respectively. Overall, for  
26  
27 400 the two-year primary end point, 8 relapses were recorded for the 10 patients in PLP10 group  
28  
29 401 (0.40 ARR) versus 25 relapses for the 12 patients in placebo (1.04 ARR), a 64% adjusted  
30  
31 402 relative rate reduction (RRR) for the PLP10 group (RRR 0.36, 95% confidence interval (CI)  
32  
33 403 0.15 to 0.87, p=0.024) (Tables 3A, 5 and Fig 3A and 3C). Excluding patients on monoclonal  
34  
35 404 antibody (natalizumab) treatment, the observed adjusted RRR became stronger (72%) over  
36  
37 405 the two years (RRR 0.28, 95% CI 0.10 to 0.79, p=0.016, Tables 3B and 5). Pair-wise  
38  
39 406 comparisons for the other two groups against placebo did not yield statistically significant  
40  
41 407 results (Tables 3A, 3B). The proportion of patients with  $\leq 1$  relapse for the two years on-study  
42  
43 408 was higher in the PLP10 group than in the placebo group (90% versus 42%, p=0.030, Table  
44  
45 409 5). Seeking to investigate further the observed difference, we compared the relapse rate  
46  
47 410 during the 24 months before entry to the study to the 24 months on-treatment for each  
48  
49 411 intervention group. We observed a statistically significant relative reduction in the ARR  
50  
51 412 (70%) only in the PLP10 group (RRR 0.30; 95% CI 0.14 to 0.65, p=0.003, Table 3A);  
52  
53 413 within-group comparisons for the three other groups ARR reduction was not significant and  
54  
55  
56  
57  
58  
59  
60



1  
2  
3 414 remained not significant when natalizumab treated patients were further excluded from the  
4  
5 415 analysis. The effect of PLP10 through time at different time-windows versus placebo for all-  
6  
7 416 time on-study patients is shown in Figures 3A to 3D. The ARR analysis, within time-  
8  
9 417 windows, was not an assigned endpoint, but it could help in the process of evaluating parallel  
10  
11 418 information as the time needed for a specific treatment intervention activity to be evident, as  
12  
13 419 well as the efficacy profile through time. PLP10 reached maximum effect within a year on-  
14  
15 420 treatment (counting from the entry baseline) and remained stable at an ARR of 0.4,  
16  
17 421 displaying a steadily reduced ARR with long free-relapse time-windows. These group B  
18  
19 422 characteristics are considered important parameters of a successful MS treatment where the  
20  
21 423 rule than the exception is the heterogeneity among patients' disease evolution. Specifically,  
22  
23 424 Figure 3D demonstrates the dispersion of relapses throughout the 2-year period of all-time  
24  
25 425 on-study (excluding patients on natalizumab) of PLP10 (n=10) versus placebo (n=10).  
26  
27 426 Placebo, in line with the existing knowledge of how relapse history works in relation to future  
28  
29 427 relapses on MS patients (contagion phenomenon) indicates the expected linearly increased  
30  
31 428 trend of the relapse incidence.<sup>46</sup> The same phenomenon was true for the groups A and C.  
32  
33 429 Finally, during the 12 month post-study extended period (January 1<sup>st</sup> 2010 to December 31<sup>st</sup>  
34  
35 430 2010) all-time on-study patients that received PLP10, showed persistent benefit in the ARR  
36  
37 431 compared to placebo (six relapses for the 10 subjects within PLP10, 0.6 ARR versus 1.9 for  
38  
39 432 the 12 subjects within placebo group, 1.58 ARR) indicating a statistically significant 62%  
40  
41 433 adjusted relative rate reduction in the ARR for the PLP10 group (RRR 0.38, 95% CI 0.12 to  
42  
43 434 0.99, p=0.046).  
44  
45 435  
46  
47  
48  
49  
50  
51 436 Regarding the ITT analysis, within PLP10 group, none of the nine drop-out patients changed  
52  
53 437 to natalizumab and two out of nine discontinued because of pregnancy, whereas two out of  
54  
55 438 seven drop-out patients from the placebo group changed to natalizumab (a total of four  
56  
57  
58  
59  
60

1  
2  
3 439 patients within the placebo arm population were on natalizumab, including the two patients  
4  
5 440 that transferred while all-time on-study versus none within PLP10 group (Supplementary  
6  
7 441 Information Fig 1). As reported, natalizumab reduces ARR by 68%, decreases the possibility  
8  
9 442 of disability progression by 43% with 57% of patients free of new or enlarging T2 lesions on  
10  
11 443 MRI scans compared to 15% on placebo.<sup>47</sup> The relapses of the drop-out patients are reported  
12  
13 444 in Table 4A. As expected no statistically significant differences in the ARR were calculated  
14  
15 445 for the comparison of any group versus placebo for the 24 months on-treatment, with a 0.75  
16  
17 446 ARR within PLP10 (30 relapses) and 1.03 ARR within placebo (41 relapses) group, a 27%  
18  
19 447 ARR reduction (Table 4B). Interestingly, despite the high non-adherence rate, there was a  
20  
21 448 statistically significant difference for the comparison of the ARR in the 24 months before  
22  
23 449 entry baseline to the 24 months on-treatment for the PLP10 group (RRR 0.45, 95% CI 0.26 to  
24  
25 450 0.78,  $p=0.005$ ).

26  
27  
28  
29  
30 451

### 31 452 **Disability progression**

32  
33 453 Regarding the per-protocol analysis, at two years, the time to disability progression, with  
34  
35 454 confirmation after six months (secondary end-point) was significantly longer only with  
36  
37 455 PLP10. The cumulative probability of disability progression was 10% in the PLP10 group  
38  
39 456 and 58% in the placebo group ( $p=0.019$ ) (Supplementary Information Fig 2). After excluding  
40  
41 457 patients on natalizumab, there was an increased statistically significant difference between  
42  
43 458 the PLP10 and the placebo group for the same analysis ( $p=0.006$ ) (Fig 4A). At two years, the  
44  
45 459 cumulative probability of progression was 10% in the PLP10 group and 70% in the placebo  
46  
47 460 group, which represents a decrease of 60 percentage points or a relative 86% decrease in the  
48  
49 461 risk of sustained progression of disability within PLP10 group (adjusted hazard ratio, 0.11;  
50  
51 462 95% CI 0.01 to 0.97,  $p=0.047$ ). One versus seven out of ten patients progressed to confirmed  
52  
53 463 disability in the PLP10 and the placebo groups respectively when patients on natalizumab  
54  
55  
56  
57  
58  
59  
60

1  
2  
3 464 were excluded. No statistically significant difference was observed for any comparison of the  
4  
5 465 other two groups compared to placebo (Fig 4A and Supplementary Information Fig 2).  
6

7 466

8  
9  
10 467 Regarding the ITT analysis, at two years, the cumulative probability of progression was 10%  
11  
12 468 in the PLP10 group and 35% in the placebo group ( $p=0.052$ , a trend for an effect), which  
13  
14 469 represents a decrease of 25 percentage points or a relative 71% decrease of the PLP10 for the  
15  
16 470 risk of sustained progression of disability (adjusted hazard ratio 0.22, 95% CI 0.04 to 1.07,  
17  
18 471  $p=0.06$ ) (Fig 4B). Two versus seven out of the total randomized patients progressed to  
19  
20 472 confirmed disability in the PLP10 and the placebo groups respectively. No significant  
21  
22 473 differences were observed for groups A or C against placebo (Fig 4B). The mean change in  
23  
24 474 Expanded Disability Status Scale (EDSS) score as a function of visit number is shown in  
25  
26 475 Figure 5.  
27  
28  
29

30 476

### 31 477 **MRI**

32  
33  
34 478 Over two years, the MRI results support the overall conclusion from the study that PLP10 has  
35  
36 479 a positive effect on disease activity since only 29% from the PLP10 group as opposed to 67%  
37  
38 480 from the placebo group developed new or enlarging T2 lesions (57% relative risk reduction).  
39  
40 481 Excluding patients on natalizumab there is an increased relative risk reduction (64%) between  
41  
42 482 PLP10 as opposed to placebo with 29% of patients on PLP10 and 80% on placebo with  
43  
44 483 development of new or enlarging T2 lesions (Table 5).  
45  
46

47 484

### 48 485 **Safety**

49  
50  
51 486 Over the course of the 30 month study no significant adverse events were reported from any  
52  
53 487 group. According to a questioner procedure the only aetiology for drop-outs was the  
54  
55 488 palatability and smell of the formula preparations. Nausea was reported by two patients. No  
56  
57  
58  
59  
60

1  
2  
3 489 abnormal values observed on any of the biochemical and haematological blood tests. No  
4  
5 490 allergic reactions reported.  
6

7  
8 491

## 9 10 492 **Discussion**

11  
12 493 In this proof-of-concept clinical trial assessing the safety and efficacy of three cocktail  
13  
14 494 intervention formulas in RRMS, we observed a significant benefit for the novel PLP10  
15  
16 495 intervention compared to placebo for both the ARR and the progression to disability. Our  
17  
18 496 results include analyses pertaining to a total of 42 months study collected data, including the  
19  
20 497 12-month, free of intervention treatment, extension period. We focused on the per-protocol  
21  
22 498 data analysis since it is the appropriate method to best provide the answer to the proof-of-  
23  
24 499 concept trial-addressed question. The high drop-out rate was solely the result of formulas  
25  
26 500 palatability, a common phenomenon in trials using oily interventions **where a lot of patients**  
27  
28 501 **tend to drop-out soon after first dosage**. We thus present our main per-protocol analysis, as  
29  
30 502 well as a subgroup analysis excluding patients on natalizumab. We have found a statistically  
31  
32 503 significant reduction in the ARR and the disability progression comparing not only patients  
33  
34 504 on PLP10 versus placebo but also comparing the ARR of the PLP10 patients in the 24-month  
35  
36 505 period prior to the study to the ARR of the 24 months on-study; the observed differences  
37  
38 506 became larger when patients that received natalizumab (the most potent disease modifier)  
39  
40 507 were excluded. The ARR decreased within a year on PLP10 and significantly remained stable  
41  
42 508 until study completion. Statistically significant difference of ARR between patients on PLP10  
43  
44 509 versus placebo continued for the additional 12 month extended period (persistent effect)  
45  
46 510 without significant difference on DMT. These clinical findings are supported by the results  
47  
48 511 regarding the MRI analysis where the proportion of patients free from new or enlarging brain  
49  
50 512 T2 lesions was also higher in PLP10 group versus placebo. The persistent effect within the  
51  
52 513 extended period it is considered of major importance and supportive of the results since it is  
53  
54  
55  
56  
57  
58  
59  
60

1  
2  
3 514 in agreement with the very long washouts, reported necessary, for omega-3 fatty acids and  
4  
5 515 especially DHA to return towards pretreatment values within the fatty acids of plasma,  
6  
7 516 platelets, monocytes and red blood cells.<sup>42</sup> This study also provides important 30-month,  
8  
9  
10 517 placebo-controlled information about the safety of PLP10, A and C interventions, where no  
11  
12 518 any adverse or severe side effects have been reported.  
13

14  
15  
16 520 As medications used to treat MS become increasingly highly specific and potent, attention to  
17  
18 521 safety is paramount. Current available treatments are products of reductionism, partially  
19  
20 522 effective, associated with severe side effects without (re)myelinating or neuroprotective  
21  
22 523 abilities. Interferons and glatiramer acetate, the most widely used first-line MS drugs  
23  
24 524 available today, are associated with the least severe side-effects among MS therapies but they  
25  
26 525 are reported with only 29-33% ARR reduction and with no significant effects on the  
27  
28 526 progression of disability. Natalizumab as previously discussed and Fingolimod with 54%  
29  
30 527 ARR reduction (without significant benefit on the progression of disability) are second-line  
31  
32 528 drugs associated with severe side-effects.<sup>47, 48</sup>  
33  
34  
35

36 529  
37  
38 530 No existing MS treatment has ever been designed as a result of SM concept approach or with  
39  
40 531 a potential to effectively stimulate intrinsic remyelinating and neuroprotecting mechanisms or  
41  
42 532 exert such an action. Now we propose that a holistic SM model approach has to be applied by  
43  
44 533 synchronized action on all involved perturbed mechanisms. PLP10 has innovative  
45  
46 534 characteristics like no any other intervention or medication tried before for MS treatment,  
47  
48 535 with unique efficacy abilities through different mechanisms of action, probably by the  
49  
50 536 synergistic effect of its constituent ingredients. PLP10 has all the characteristics of a medical  
51  
52 537 food with the action to feed a normal metabolic process by supplying nutritional structural  
53  
54 538 membrane precursors, building blocks, and vitamins from dietary sources that enhance  
55  
56  
57  
58  
59  
60

1  
2  
3 539 remyelination and neuroprotection and simultaneously promote normalization of all cellular  
4  
5 540 membranes lipid content. The intention is to normalize the specific nutritional requirements  
6  
7 541 of the MS patients.  
8

9  
10 542

11 543 Different factors and molecular entities appear to be part of the possible aetiology for MS  
12  
13 544 with specific PUFA and antioxidants found to be key substances related to all known  
14  
15 545 pathogenic and recovery mechanisms. But, it is well established that MS patients are  
16  
17 546 characterized with significant deficiencies in antioxidant efficiency as well as in PUFA levels  
18  
19 547 in blood and cellular membranes.<sup>11, 49-51</sup>  
20  
21  
22

23 548

24  
25 549 According to one hypothesis, the change in the ratio of omega-3 to omega-6, due to  
26  
27 550 increasing consumption of omega-6 PUFA, meaning high accumulation of AA, in the  
28  
29 551 Western diet, may be one of the major factors responsible for the increasing incidence of  
30  
31 552 inflammatory diseases relative to populations. In the Western diet, the ratio of omega-3 to  
32  
33 553 omega-6 is about 1:20–30; in populations that consume fish-based diets, the ratio is about  
34  
35 554 1:1–2.<sup>52, 53</sup> The intervention daily dose was aiming and believed to be high enough to  
36  
37 555 restore/amplify body efficient antioxidant activity and ensure cellular membranes lipid profile  
38  
39 556 normalization (PUFA content) and simultaneously potentiate involvement of the ingredients  
40  
41 557 in the anti-inflammatory and recovery mechanisms. Diet fatty acid molecules need about six  
42  
43 558 months period to exert their beneficial effect and this essential parameter was for the first  
44  
45 559 time under consideration in our study design (normalization period).<sup>42</sup> This chronotherapy  
46  
47 560 parameter it is of major importance in line with the SM treatment philosophy and if it is not  
48  
49 561 included in the trial design the possibility of misleading result evaluation greatly increases. In  
50  
51 562 fact, considering that omega-3 supplementation can release and replace excess AA within the  
52  
53  
54  
55  
56  
57  
58  
59  
60

1  
2  
3 563 cellular membranes, we can speculate that an increased inflammatory activity can possibly  
4  
5 564 result during the first six months of supplementation (during normalization period).  
6  
7  
8 565

9  
10 566 The maintenance of myelin requires continued turnover of its components throughout life.<sup>54,55</sup>

11 567 In addition to the EPA, DHA, LA, and GLA, PLP10 was containing limited quantities of

12  
13 568 other structural PUFA, specific MUFA (mostly oleic acid) and SFA (palmitic and stearic

14  
15  
16 569 acid), specifically to provide a direct source for neuronal cell membranes rehabilitation and

17  
18 570 for (re)myelination and neuroprotection since they are all major components, precursors and

19  
20  
21 571 building blocks of any new physiological myelin and cellular membranes in general.

22 572 Assembly of the correct molecules into myelin membrane may be especially critical during

23  
24  
25 573 active synthesis. Possibly, if critical constituents aren't available or are metabolically

26  
27 574 blocked, amyelination, dysmyelination or demyelination may ensue.<sup>56</sup>  
28  
29 575

30  
31  
32 576 The well known and established safety of the ingredients used and the protocol guidelines

33  
34 577 were supportive reasons for us to proceed with the clinical study even though with limitation

35  
36 578 on the pre-estimation of required trial sample size as it was discussed in method section. The

37  
38 579 adherence of the subjects is another issue but the duration of the study (42 months) is adding

39  
40 580 power to the results;<sup>44</sup> having the research questions been consciously and carefully

41  
42  
43 581 approached and answered. Furthermore, the statistical methodologies used along with the

44  
45 582 appropriate adjustments, broadly accepted for MS clinical trials, power the findings, results,

46  
47 583 and significance. The baseline characteristics of the treatment arms could possibly be

48  
49 584 considered indicative of four very active groups of patients but that was the result of the

50  
51 585 limited number of RRMS population eligible for the study within Cyprus. On the other hand

52  
53  
54 586 the balanced baseline characteristics without statistical differences, the statistical adjustments

55  
56 587 (for all important baseline parameters i.e. relapses, EDSS, age and DMT) and the  
57  
58  
59  
60

1  
2  
3 588 randomization within four different groups are the safety valves against data  
4  
5 589 misinterpretation. Yet, in small randomized control trials with a high drop-out rate, the per-  
6  
7 590 protocol analysis could be affected by the characteristics of the patients dropping out. In  
8  
9 591 order to safeguard our findings in the best possible way under the circumstances, we  
10  
11 592 proceeded to adjusting for confounders. Moreover, we cannot discard our finding as a false  
12  
13 593 positive, given that this is a randomized, double-blind, placebo-controlled clinical trial and,  
14  
15 594 despite its small sample size, represents a piece of evidence that only a larger randomized  
16  
17 595 controlled trial can replicate or refute. It is possible to question why DMTs efficacy cannot  
18  
19 596 be emerged out of the data analysis, of the four treatment arms, and in accordance to their  
20  
21 597 published values. We believe that the limited efficacy of the DMTs, the sample size and the  
22  
23 598 statistical adjustments were strong limiting determining factors for such an indication to be  
24  
25 599 countable. An additional argument is that the efficacy reported for the analysis of pre-  
26  
27 600 treatment (24 months before entry baseline) versus on-trial ARR could be considered as  
28  
29 601 potentially biased due to differences of how relapses were defined during the course of a  
30  
31 602 study compared to pre-treatment period; or due to regression to the mean or placebo effect.  
32  
33 603 This analysis was performed as an additional exploratory analysis that we were able to do due  
34  
35 604 to the availability of data. The relapses of the two pre-treatment years were drawn out of the  
36  
37 605 patients' archival records by the same treating neurologist involved in the study (MP), and  
38  
39 606 according to the patients' hospitalization date for receiving intravenous methyl-prednisolone.  
40  
41 607 This analysis was not used as a primary or a secondary end-point under investigation  
42  
43 608 although it is usually reported by many clinical studies. As a matter of fact many early phase  
44  
45 609 trials are based only on such an analysis (before versus after treatment results). In almost all  
46  
47 610 MS trials the number of relapses within the two years before baseline is a factor under  
48  
49 611 adjustment for the statistical analyses.<sup>48</sup> The inclusion of the post-hoc MRI analysis is another  
50  
51 612 limiting factor that needs attention since it was used as an additional aside exploratory  
52  
53  
54  
55  
56  
57  
58  
59  
60



1  
2  
3 613 approach (due to study budget limitations it was not possible to be used as a formal  
4  
5 614 endpoint); but the MRI evaluation was blinded and can be considered as representative of the  
6  
7 615 randomized subjects within the treatment arms. As far as the regression to the mean and the  
8  
9 616 placebo effect concerns we believe that the 6-month normalization period is an accountable  
10  
11 617 and valuable eliminating factor of the possible effect; as well as the presence of four groups,  
12  
13 618 where only the PLP10 treatment arm is associated with statistically significant efficacy versus  
14  
15  
16 619 placebo. It is a placebo-controlled study after all.  
17  
18  
19 620

20  
21 621 Our observations are consistent with the idea that simultaneous availability of specific PUFA  
22  
23 622 along with other major membrane and myelin building blocks in combination with specific  
24  
25 623 antioxidants, within optimum quantity, quality, ratio and structural form can possibly result to  
26  
27 624 a more appropriate holistic therapy reducing MS disease activity. This is probably succeeded  
28  
29 625 through synergistic and/or simultaneous effect on the interactions and dynamics of the most  
30  
31 626 probable environmental and biological disease causing factors that induce complex biological  
32  
33 627 network of events for disease pathogenesis and evolution; as well as on the protective and  
34  
35 628 reparative mechanisms. We can additionally speculate that the nature of the intervention  
36  
37 629 formula cannot be prohibitive for its use as preventive regimen and does not preclude  
38  
39 630 probable positive efficacy on the other types of MS, but has to be further investigated. A  
40  
41 631 larger size multicenter clinical trial will better establish PLP10 place in the armamentarium of  
42  
43 632 treatments for MS.  
44  
45  
46  
47  
48  
49  
50  
51  
52  
53  
54  
55  
56  
57  
58  
59  
60

633  
634 It is commonly accepted that nutrition is one of the possible environmental factors involved  
635  
636 in the pathogenesis of MS, but its role as complementary MS treatment is unclear and largely  
637  
638 disregarded.<sup>57</sup> It is well known that the majority of the patients suffering from MS they do  
639  
640 use dietary supplements for a variable length of time and they prefer supplement type of

1  
2  
3 638 “help” over conventional drugs.<sup>58</sup> Dietary antioxidants and fatty acids may influence the  
4  
5 639 disease process in MS by reducing immune-mediated inflammation, oxidative stress and  
6  
7 640 excitotoxic damage.<sup>11</sup> Present data reveal that healthy dietary molecules have a pleiotropic  
8  
9 641 role and are able to change cell metabolism from anabolism to catabolism and down-regulate  
10  
11 642 inflammation by interacting with enzymes, nuclear receptors and transcriptional factors.<sup>57</sup>  
12  
13  
14 643 The present study, for the first time provides strong link evidence between dietary, metabolic,  
15  
16 644 immunological, and neurobiological aspects of MS after three quarters of a century of  
17  
18 645 unsuccessful scientific efforts. This might probably be the beginning of opening new  
19  
20  
21 646 horizons and new avenues in the approach of MS prevention and treatment, and possibly of  
22  
23 647 other multifactorial chronic diseases, including neurodegenerative and autoimmune as well.  
24  
25 648  
26  
27 649  
28  
29 650  
30  
31 651  
32  
33 652  
34  
35 653  
36  
37 654  
38  
39 655  
40  
41 656  
42  
43 657  
44  
45 658  
46  
47 659  
48  
49 660  
50  
51 661  
52  
53 662  
54  
55  
56  
57  
58  
59  
60

1  
2  
3  
4  
5  
6  
7  
8  
9  
10  
11  
12  
13  
14  
15  
16  
17  
18  
19  
20  
21  
22  
23  
24  
25  
26  
27  
28  
29  
30  
31  
32  
33  
34

| 1.                                                                                                                                                                                                                                                                                                                                                                                                                                                                                                                                                                                       |                                                                                                                                                                                                                                                                                               |                                                                                                                                          |                                                 |
|------------------------------------------------------------------------------------------------------------------------------------------------------------------------------------------------------------------------------------------------------------------------------------------------------------------------------------------------------------------------------------------------------------------------------------------------------------------------------------------------------------------------------------------------------------------------------------------|-----------------------------------------------------------------------------------------------------------------------------------------------------------------------------------------------------------------------------------------------------------------------------------------------|------------------------------------------------------------------------------------------------------------------------------------------|-------------------------------------------------|
| Treatment Arms                                                                                                                                                                                                                                                                                                                                                                                                                                                                                                                                                                           |                                                                                                                                                                                                                                                                                               |                                                                                                                                          |                                                 |
| A                                                                                                                                                                                                                                                                                                                                                                                                                                                                                                                                                                                        | B (PLP10)                                                                                                                                                                                                                                                                                     | C                                                                                                                                        | Placebo                                         |
| <b>Intervention:</b><br>EPA (1,650mg) / DHA<br>(4,650mg) / GLA<br>(2,000mg) / LA<br>(3,850mg) / total other<br>omega-3 (600mg)* / total<br>MUFA** (1,714mg) +<br>total SFA (18:0 160mg,<br>16:0 650mg) / vitamin A<br>(0.6mg) / vitamin E<br>(22mg)                                                                                                                                                                                                                                                                                                                                      | <b>Intervention:</b><br>EPA (1,650mg) / DHA<br>(4,650mg) / GLA<br>(2,000mg) / LA<br>(3,850mg) / total other<br>omega-3 (600mg)* / total<br>MUFA** (1,714mg) +<br>total SFA (18:0 160mg,<br>16:0 650mg) / vitamin A<br>(0.6mg) / vitamin E<br>(22mg) +<br>pure $\gamma$ -tocopherol<br>(760mg) | <b>Intervention:</b><br>pure $\gamma$ -tocopherol<br>(760mg) dispersed in<br>pure virgin olive oil<br>(16,137 mg) as delivery<br>vehicle | <b>Intervention:</b><br>Olive oil (pure virgin) |
| * Other omega-3: C18:3n-3 37mg, C18:4n-3 73mg, C20:4n-3 98mg, C22:5n-3 392mg                                                                                                                                                                                                                                                                                                                                                                                                                                                                                                             |                                                                                                                                                                                                                                                                                               |                                                                                                                                          |                                                 |
| ** MUFA: 18:1 1300mg, 20:1 250mg, 22:1 82mg, 24:1 82mg                                                                                                                                                                                                                                                                                                                                                                                                                                                                                                                                   |                                                                                                                                                                                                                                                                                               |                                                                                                                                          |                                                 |
| EPAX1050, EPAX AS, Aalesund, Norway; was used as the source for the omega-3 PUFA, as re-esterified glycerides from fish body oils; Borage seed oil (organic, cold pressed) "Borago officinalis" Goerlich Pharma International GmbH, Edling, Germany, was used as the source for the omega-6 PUFA, MUFA and SFA, as triglycerides. The pure $\gamma$ -tocopherol was purchased from Tama Biochemical Co. Ltd., Shinjuku-ku Tokyo, Japan; vitamin A as beta-carotene from HealthAid Ltd., Middlesex, United Kingdom and the Citrus aroma from Givaudan Schwaiz AG, Dubendorf, Switzerland. |                                                                                                                                                                                                                                                                                               |                                                                                                                                          |                                                 |
| <b>Table 1.</b> Intervention ingredients per treatment arm. Citrus-aroma was used as masking agent of the taste and odor and added in each one of the intervention for a total of 19.5ml dosage of solution per day.                                                                                                                                                                                                                                                                                                                                                                     |                                                                                                                                                                                                                                                                                               |                                                                                                                                          |                                                 |

663

664

665

666

667

668

669

670

671

672

673

| <b>2A.</b>                                 |                   |                    |                   |                   |              |
|--------------------------------------------|-------------------|--------------------|-------------------|-------------------|--------------|
| Characteristics                            | Group A<br>(n=20) | Group B†<br>(n=20) | Group C<br>(n=20) | Placebo<br>(n=20) | P-<br>value  |
| <b>Sex</b>                                 |                   |                    |                   |                   |              |
| Female - no. (%)                           | 15 (75)           | 15 (75)            | 15 (75)           | 15 (75)           | <b>1.000</b> |
| <b>Age (yr)</b>                            |                   |                    |                   |                   |              |
| Mean ± Standard Deviation (SD)             | <b>38.0±11.9</b>  | <b>36.9±8.4</b>    | <b>37.7±8.7</b>   | <b>38.1±10.9</b>  | <b>0.982</b> |
| Median (Range)                             | 38.0 (22–65)      | 37.0 (25–61)       | 36.5 (24–54)      | 36.0 (21–58)      |              |
| <b>Treatment history</b>                   |                   |                    |                   |                   |              |
| Patients on DMT- no. (%)                   | 11 (55)           | 9 (45)             | 12 (60)           | 10 (50)           | <b>0.875</b> |
| <b>Pre-treatment disease duration (yr)</b> |                   |                    |                   |                   |              |
| Mean ± SD                                  | <b>9.0±7.6</b>    | <b>8.6±4.8</b>     | <b>8.6±5.3</b>    | <b>7.7±5.7</b>    | <b>0.909</b> |
| Median (Range)                             | 7.5 (2–37)        | 8.0 (2–20)         | 8.0 (3–24)        | 6.5 (2–25)        |              |
| <b>Pre-treatment relapses‡</b>             |                   |                    |                   |                   |              |
| Mean ± SD                                  | <b>2.33±1.68</b>  | <b>2.41±1.73</b>   | <b>2.31±1.66</b>  | <b>2.10±1.32</b>  | <b>0.946</b> |
| Median (Range)                             | 2.0 (1–6)         | 2.0 (1–7)          | 2.0 (1–6)         | 2.0 (1–4)         |              |
| ARR                                        | <b>1.17</b>       | <b>1.21</b>        | <b>1.16</b>       | <b>1.05</b>       | <b>0.946</b> |
| Patients -% with ≤1 relapse                | 40                | 45                 | 40                | 35                |              |
| <b>Baseline EDSS score‡</b>                |                   |                    |                   |                   |              |
| Mean ± SD                                  | <b>2.52±1.23</b>  | <b>2.15±1.05</b>   | <b>2.42±1.21</b>  | <b>2.39± 0.93</b> | <b>0.775</b> |
| Median (Range)                             | 2.5 (1.0–5.5)     | 2.0 (1.0–4.0)      | 2.5 (0.0–5.0)     | 2.5 (1.0–4.0)     |              |
| <b>2B.</b>                                 |                   |                    |                   |                   |              |
| Characteristics                            | Group A<br>(n=10) | Group B†<br>(n=10) | Group C<br>(n=9)  | Placebo<br>(n=12) | P-<br>value  |
| <b>Sex</b>                                 |                   |                    |                   |                   |              |
| Female - no. (%)                           | 5 (50)            | 7 (70)             | 6 (66.6)          | 10 (83.3)         | <b>0.419</b> |
| <b>Age (yr)</b>                            |                   |                    |                   |                   |              |
| Mean ± SD                                  | <b>36.6±13.5</b>  | <b>34.80±5.4</b>   | <b>40.9±8.1</b>   | <b>39.8±13.2</b>  | <b>0.572</b> |
| Median (Range)                             | 34.5 (22–65)      | 34.5 (26–43)       | 40.0 (29–54)      | 37.5 (21–58)      |              |
| <b>Treatment history</b>                   |                   |                    |                   |                   |              |
| Patients on DMT- no. (%)                   | 6 (60)            | 4 (40)             | 6 (67)            | 6 (50)            | <b>0.949</b> |
| <b>Pre-treatment disease duration (yr)</b> |                   |                    |                   |                   |              |
| Mean ± SD                                  | <b>9.7±10.0</b>   | <b>8.3±5.3</b>     | <b>11.3±6.1</b>   | <b>8.7± 7.1</b>   | <b>0.807</b> |
| Median (Range)                             | 7.5 (2–37)        | 8.0 (2–20)         | 8.0 (4–24)        | 5.5 (2–25)        |              |
| <b>Pre-treatment relapses</b>              |                   |                    |                   |                   |              |

|                             |                  |                  |                  |                  |              |
|-----------------------------|------------------|------------------|------------------|------------------|--------------|
| Mean ± SD                   | <b>2.20±1.47</b> | <b>2.70±1.25</b> | <b>1.78±0.66</b> | <b>1.67±1.37</b> | <b>0.241</b> |
| Median (Range)              | 2.0 (1 – 6)      | 2.5 (1 – 4)      | 2.0 (1 – 3)      | 1.5 (1 – 4)      |              |
| ARR                         | <b>1.10</b>      | <b>1.35</b>      | <b>0.89</b>      | <b>0.83</b>      |              |
| Patients -% with ≤1 relapse | 30               | 20               | 33               | 50               |              |
| <b>Baseline EDSS score</b>  |                  |                  |                  |                  |              |
| Mean ± SD                   | <b>2.65±1.37</b> | <b>2.40±1.12</b> | <b>2.11±1.02</b> | <b>2.16±0.96</b> | <b>0.698</b> |
| Median (Range)              | 3.0 (1.0–5.5)    | 2.5 (1.0–4.0)    | 2.0 (1.0–4.0)    | 2.0 (1.0–3.5)    |              |

† PLP10 group

‡ Available data at Entry Baseline (n=18 for group A, n=17 for group B, n=19 for group C, n=19 for group D)

**Table 2.** The table section 2A reports the demographics and baseline disease characteristics for total randomized population by treatment arm.

The table section 2B reports the demographics and baseline disease characteristics of all-time on-study population by treatment arm. There were no significant between study-group differences at baseline for any characteristic.

674

675

676

677

678

679

680

681

682

683

684

685

686

687

| <b>3A.</b>                                                                                                                                                                                                    |                   |              |                    |              |                  |              |                   |              |
|---------------------------------------------------------------------------------------------------------------------------------------------------------------------------------------------------------------|-------------------|--------------|--------------------|--------------|------------------|--------------|-------------------|--------------|
| Characteristics                                                                                                                                                                                               | Group A<br>(N=10) |              | Group B†<br>(N=10) |              | Group C<br>(N=9) |              | Placebo<br>(N=12) |              |
| End Point                                                                                                                                                                                                     | X                 | Y            | X                  | Y            | X                | Y            | X                 | Y            |
| Total No. of relapses                                                                                                                                                                                         | 22                | 17           | 27                 | 8            | 16               | 13           | 20                | 25           |
| <b>Annual Relapse Rate (ARR)</b>                                                                                                                                                                              | <b>1.10</b>       | <b>0.85</b>  | <b>1.35</b>        | <b>0.40</b>  | <b>0.88</b>      | <b>0.72</b>  | <b>0.83</b>       | <b>1.04</b>  |
| <b>% Reduction Compared to Placebo (primary endpoint) (Ys)¶</b>                                                                                                                                               |                   | <b>-18</b>   |                    | <b>-62</b>   |                  | <b>-30</b>   |                   | <b>N/A</b>   |
| <b>P Value against placebo</b>                                                                                                                                                                                |                   | <b>0.468</b> |                    | <b>0.024</b> |                  | <b>0.578</b> |                   |              |
| <b>ARR change -% (Y to X)¶</b>                                                                                                                                                                                |                   | <b>-23</b>   |                    | <b>-70</b>   |                  | <b>-18</b>   |                   | <b>+25</b>   |
| <b>P value against baseline</b>                                                                                                                                                                               |                   | <b>0.425</b> |                    | <b>0.003</b> |                  | <b>0.578</b> |                   | <b>0.500</b> |
| X: Total number of relapses of 24 months pre-treatment (baseline)<br>Y: Total number of relapses of 24 months on-treatment<br>¶ Unadjusted estimate                                                           |                   |              |                    |              |                  |              |                   |              |
| <b>3B.</b>                                                                                                                                                                                                    |                   |              |                    |              |                  |              |                   |              |
| <b>Excluding patients on natalizumab</b>                                                                                                                                                                      | Group A<br>(N=9)  |              | Group B†<br>(N=10) |              | Group C<br>(N=9) |              | Placebo<br>(N=10) |              |
| End Point                                                                                                                                                                                                     | X                 | Y            | X                  | Y            | X                | Y            | X                 | Y            |
| Total No. of relapses                                                                                                                                                                                         | 16                | 15           | 27                 | 8            | 16               | 13           | 13                | 19           |
| <b>Annual Relapse Rate (ARR)</b>                                                                                                                                                                              | <b>0.88</b>       | <b>0.83</b>  | <b>1.35</b>        | <b>0.40</b>  | <b>0.88</b>      | <b>0.72</b>  | <b>0.65</b>       | <b>0.95</b>  |
| <b>% Reduction Compared to Placebo (primary endpoint) (Ys)¶</b>                                                                                                                                               |                   | <b>-13</b>   |                    | <b>-58</b>   |                  | <b>-24</b>   |                   | <b>N/A</b>   |
| <b>P Value against placebo</b>                                                                                                                                                                                |                   | <b>0.493</b> |                    | <b>0.016</b> |                  | <b>0.412</b> |                   |              |
| <b>ARR change -% (Y to X)¶</b>                                                                                                                                                                                |                   | <b>-6</b>    |                    | <b>-70</b>   |                  | <b>-18</b>   |                   | <b>+46</b>   |
| <b>P value against baseline</b>                                                                                                                                                                               |                   | <b>0.857</b> |                    | <b>0.003</b> |                  | <b>0.578</b> |                   | <b>0.354</b> |
| X: Total number of relapses of 24 months pre-treatment (baseline)<br>Y: Total number of relapses of 24 months on-treatment<br>† PLP10 group<br>¶ Unadjusted estimate                                          |                   |              |                    |              |                  |              |                   |              |
| <b>Table 3.</b> The table section 3A reports the two year primary end points of ARR of all-time on-study population by treatment arm and percent difference with placebo. During the 24mo period on-treatment |                   |              |                    |              |                  |              |                   |              |

1  
2  
3 the ARR of the group A was 0.85 with 18% decrease compared to placebo (p=0.468), of PLP10 group  
4  
5 0.40 with 62% decrease (p=0.024), and of group C 0.72 with 30% decrease (p=0.578) and reports the  
6  
7 comparison of the 24mo pre-treatment ARR (baseline ARR) to 24mo on-treatment ARR of all-time on-  
8  
9 study population including patients on natalizumab.  
10

11  
12  
13  
14 The table section 3B reports comparison of the 24mo pre-treatment ARR to 24mo on-treatment ARR of  
15  
16 all-time on-study population excluding patients on natalizumab; and the comparison of the ARR during  
17  
18 the 24mo period on-treatment (primary end point) between each one of the groups against placebo.  
19

20  
21 68822  
23 68924  
25 69026  
27 69128  
29 69230  
31 69332  
33 69434  
35 69536  
37 69638  
39 69740  
41 69842  
43 69944  
45 70046  
47 70148  
49 70250  
51 70352  
53 70454  
55 70556  
57  
58  
59  
60

| <b>4A.</b>                                                                                                                                                           |                   |             |                    |             |                   |             |                   |             |
|----------------------------------------------------------------------------------------------------------------------------------------------------------------------|-------------------|-------------|--------------------|-------------|-------------------|-------------|-------------------|-------------|
| Characteristics                                                                                                                                                      | Group A<br>(N=8)  |             | Group B†<br>(N=7)  |             | Group C<br>(N=10) |             | Placebo<br>(N=7)  |             |
|                                                                                                                                                                      | X                 | Y           | X                  | Y           | X                 | Y           | X                 | Y           |
| No. of Relapses                                                                                                                                                      | 20                | 14          | 14                 | 14          | 27                | 26          | 20                | 13          |
| <b>Annual Relapse Rate (ARR)</b>                                                                                                                                     | <b>1.25</b>       | <b>0.88</b> | <b>1.00</b>        | <b>1.00</b> | <b>1.35</b>       | <b>1.30</b> | <b>1.42</b>       | <b>0.92</b> |
| X: Total number of relapses of 24 months pre-treatment<br>Y: Total number of relapses of 24 months on-treatment                                                      |                   |             |                    |             |                   |             |                   |             |
| <b>4B.</b>                                                                                                                                                           |                   |             |                    |             |                   |             |                   |             |
| Characteristics                                                                                                                                                      | Group A<br>(N=20) |             | Group B†<br>(N=20) |             | Group C<br>(N=20) |             | Placebo<br>(N=20) |             |
| End Point                                                                                                                                                            | X                 | Y           | X                  | Y           | X                 | Y           | X                 | Y           |
| No. of Relapses                                                                                                                                                      | 45                | 34          | 49                 | 30          | 46                | 41          | 43                | 41          |
| <b>Annual Relapse Rate (ARR)</b>                                                                                                                                     | <b>1.13</b>       | <b>0.85</b> | <b>1.23</b>        | <b>0.75</b> | <b>1.15</b>       | <b>1.03</b> | <b>1.08</b>       | <b>1.03</b> |
| ARR Reduction -% (Y to X)¶                                                                                                                                           | -25               |             | -39                |             | -10               |             | -5                |             |
| <b>P value against baseline</b>                                                                                                                                      | <b>0.120</b>      |             | <b>0.005</b>       |             | <b>0.475</b>      |             | <b>0.652</b>      |             |
| <b>% Reduction of the ARR Compared to Placebo (Ys)¶</b>                                                                                                              | <b>-18</b>        |             | <b>-27</b>         |             | <b>0.0</b>        |             | <b>N/A</b>        |             |
| <b>P Value against placebo</b>                                                                                                                                       | <b>0.447</b>      |             | <b>0.121</b>       |             | <b>0.996</b>      |             |                   |             |
| X: Total number of relapses of 24 months pre-treatment (baseline)<br>Y: Total number of relapses of 24 months on-treatment<br>¶ Unadjusted estimate<br>† PLP10 group |                   |             |                    |             |                   |             |                   |             |

**Table 4.** The table section 4A reports the two year primary end point of relapses based on study design as reported by drop-out patients by Treatment Arm. The most drop-out patients that went on disease modified therapy (DMT) were from the group A and placebo with three and two patients respectively on natalizumab. These parameters justify the decreased number of relapses recorded within group A and placebo drop-outs; and this could affect the ITT analysis in favor of placebo when the total two-year recorded data are used. For PLP10 group, 14 relapses were reported at baseline and remained the same during the two-year study. For placebo, 20 relapses were reported at baseline and decreased to 13 during the two-



1  
2  
3 year study. This is expected since, for PLP10 group 43% of the drop-outs were under DMT at  
4 entry baseline and remained the same until the end of the study with no patient on  
5 natalizumab; but 57% of the placebo group drop-outs that were under DMT at entry baseline  
6 increased to 86% at the end of the study including two patients on natalizumab.  
7  
8  
9  
10

11  
12  
13  
14 The table section 4B reports comparison of 24 months pre-treatment ARR (baseline) to 24  
15 months on-treatment ARR of total randomized population, by treatment arm. The ARR of  
16 PLP10 group was 1.23 at baseline and 0.75 at the end of the study (39% reduction  $p=0.005$ ),  
17 and for placebo 1.08 at baseline and 1.03 at the end of the study (5% reduction  $p=0.652$ ). No  
18 statistical difference was calculated for the other two treatment arms. During the 24 months  
19 on-treatment, PLP10 group presented a 27% reduction of ARR versus placebo ( $p=0.121$ ),  
20 with all groups without statistically significant results.  
21  
22  
23  
24  
25  
26  
27  
28  
29

706

707

708

709

710

711

712

713

714

| <b>5.</b>                                                                                                            |                   |                            |                  |                    |                                      |
|----------------------------------------------------------------------------------------------------------------------|-------------------|----------------------------|------------------|--------------------|--------------------------------------|
| Characteristics*                                                                                                     | Group A<br>(n=10) | Group B<br>PLP10<br>(n=10) | Group C<br>(n=9) | Placebo<br>(n=12)  | P-value<br>Group<br>B vs.<br>Placebo |
| Annual relapse rate over 1 year**                                                                                    | <b>0.80</b>       | <b>0.40</b>                | <b>0.78</b>      | <b>0.83</b>        |                                      |
| Total number of relapses**                                                                                           | 8                 | 4                          | 7                | 10                 |                                      |
| <b>Primary end points</b>                                                                                            |                   |                            |                  |                    |                                      |
| Annual relapse rate over 2 years (95% CI)**                                                                          | 0.85              | <b>0.40 (0.15-0.87)</b>    | 0.72             | <b>1.04</b>        | <b>0.024</b>                         |
| Total number of relapses**                                                                                           | 17                | 8                          | 13               | 25                 |                                      |
| <b>Excluding patients on natalizumab</b>                                                                             |                   |                            |                  |                    |                                      |
|                                                                                                                      | (n=9)             | (n=10)                     | (n=9)            | (n=10)             |                                      |
| Annual relapse rate over 2 years (95% CI)                                                                            | 0.83              | <b>0.40 (0.10-0.79)</b>    | 0.72             | <b>0.95</b>        | <b>0.016</b>                         |
| Total number of relapses                                                                                             | 15                | <b>8</b>                   | 13               | <b>19</b>          |                                      |
| <b>Secondary end points</b>                                                                                          |                   |                            |                  |                    |                                      |
| Cumulative probability of sustained progression increase by 1 point on EDSS confirmed after 6 mo, over 2 years -% ** | 43                | <b>10 (1/10)</b>           | 24               | <b>58 (7/12)</b>   | <b>0.019</b>                         |
| <b>Excluding patients on natalizumab</b>                                                                             |                   |                            |                  |                    |                                      |
| cumulative probability of sustained progression increase by 1 point on EDSS confirmed after 6 mo, over 2 years -%    | 33                | <b>10 (1/10)</b>           | 24               | <b>70 (7/10)</b>   | <b>0.006</b>                         |
| <b>Exploratory Results</b>                                                                                           |                   |                            |                  |                    |                                      |
| Patients proportion with $\leq 1$ relapse over 2 years -% **                                                         | 50 (5/10)         | <b>90 (9/10)</b>           | 56 (5/9)         | <b>42 (5/12)</b>   | <b>0.030</b>                         |
| <b>MRI</b>                                                                                                           |                   |                            |                  |                    |                                      |
| Patients proportion with new or enlarging T2 lesions-% **                                                            | ----              | <b>29 (2/7)</b>            | ----             | <b>67 (4/6)</b>    |                                      |
| <b>Excluding patients on natalizumab</b>                                                                             |                   |                            |                  |                    |                                      |
| Patients proportion with no new or enlarging T2 lesions-%                                                            | ----              | <b>29 (2/7)</b>            | ----             | <b>80 (4/5)</b>    |                                      |
| <b>DMT (interferons, glatiramer acetate) and natalizumab</b>                                                         |                   |                            |                  |                    |                                      |
| Patients proportion on DMT and natalizumab at the end of 2 years-% **                                                | 80 (8/10)†        | <b>60 (6/10)</b>           | 67 (6/9)         | <b>75 (9/12) ‡</b> | <b>0.747</b>                         |
| * CI denotes confidence interval.                                                                                    |                   |                            |                  |                    |                                      |
| ** Including patients on natalizumab                                                                                 |                   |                            |                  |                    |                                      |
| † 1 out of 10 on natalizumab                                                                                         |                   |                            |                  |                    |                                      |
| ‡ 2 out of 12 on natalizumab                                                                                         |                   |                            |                  |                    |                                      |

**Table 5.** Clinical end points, according to study group for all-time on-study population.

715

1  
2  
3 716 Acknowledgments: We thank all participant patients. We thank Thyrsos Posporis MD and the  
4  
5 717 central reading centre (Ayios Therissos Medical Diagnostic Centre, Nicosia, Cyprus), and  
6  
7 718 Eleni Eracleous, MD (neuroradiologist) for the contribution on the MRI scans and their team  
8  
9 719 for the MRI reading. Special thanks to Elena Kkolou the pharmacist involved in the study and  
10  
11 720 Eftychia Gaglia for her nursing contribution and collection of blood from the patients. We  
12  
13 721 also thank Demetris Hadjisofoklis and Ioanna Leontiou (University of Nicosia, Helix  
14  
15 722 Business incubator) for their contribution on randomization process, data collection, filing  
16  
17 723 and blind codes keeping. Additionally we would like to thank the CING for hosting the  
18  
19 724 project. Moreover, we thank the Cyprus Ministry of Commerce, Industry and Tourism for  
20  
21 725 funding the project; and Yasoo Health Ltd., for providing some of the raw materials in  
22  
23 726 exchange of investigating, on their behalf, the efficacy and safety of  $\gamma$ -tocopherol.  
24  
25  
26  
27  
28

29 727  
30 728 Contributors: All authors interpreted the data. I.S.P drafted the report and figures and all  
31  
32 729 authors critically revised and approved the final version. M.C.P and I.S.P were responsible  
33  
34 730 for the protocol and study design. M.C.P was the evaluator of patients' clinical progress signs  
35  
36 731 and the treatment physician. I.S.P and G.N.L were involved in the non-pharmacologic  
37  
38 732 treatment-related care. I.S.P performed the literature search and both I.S.P and G.N.L  
39  
40 733 contributed on the intervention formulation and composition rational. I.S.P supervised the  
41  
42 734 composition procedure of the interventions and the fatty acid profile analysis of the red blood  
43  
44 735 cell membranes. E.E.N and I.S.P performed the statistical analyses. E.E.N was an  
45  
46 736 independent scientist. All authors vouch for the accuracy and completeness of the data and  
47  
48 737 the statistical analyses.  
49  
50  
51  
52  
53  
54  
55  
56  
57  
58  
59  
60

1  
2  
3 739 Funding: Supported by a grand from the Cyprus Ministry of Commerce, Industry and  
4  
5 740 Tourism, program for the creation of new high technology and innovation enterprises through  
6  
7 741 the business incubator.  
8

9  
10 742

11 743 Competing interest: M.C.P, G.N.L, I.S.P received grand support from the Cyprus Ministry of  
12  
13 744 Commerce, Industry and Tourism, Program for the Creation of New High Technology and  
14  
15 745 Innovation Enterprises through the Business Incubator. PALUPA Medical Ltd. is a research  
16  
17 746 company formed and registered for completion of the study, as required by the Governments'  
18  
19 747 funding grand program. M.C.P, G.N.L, I.S.P, and CING are all stockholders of the PALUPA  
20  
21 748 Medical Ltd. M.C.P is an employee at the CING. I.S.P is a senior research collaborator  
22  
23 749 hosted by the CING. G.N.L is a CING collaborator. E.E.N declares no-competing interest.  
24  
25  
26

27 750 No pharmaceutical companies were involved in this phase II clinical trial. The intervention is  
28  
29 751 under a USA provisional patent; Application Number 61469081.  
30  
31

32 752

33  
34 753 Ethical approval: Cyprus National bioethics committee (reference EEBK/EII/2005/10).  
35

36 754

37  
38 755 All authors have completed the Unified Competing Interest form at  
39  
40 756 [www.icmje.org/coi\\_disclosure.pdf](http://www.icmje.org/coi_disclosure.pdf) (available on request from the corresponding author) and  
41  
42 757 declare that (1) M.C.P, G.N.L, I.S.P have support from Cyprus Ministry of Commerce,  
43  
44 758 Industry and Tourism, Program for the Creation of New High Technology and Innovation  
45  
46 759 Enterprises through the Business Incubator for the submitted work; (2) E.E.N has no  
47  
48 760 relationships with Cyprus Ministry of Commerce, Industry and Tourism, or PLUPA Medical  
49  
50 761 Ltd. that might have an interest in the submitted work in the previous 3 years; (3) their  
51  
52 762 spouses, partners, or children have no financial relationships that may be relevant to the  
53  
54  
55  
56  
57  
58  
59  
60

1  
2  
3 763 submitted work; and (4) E.E.N has a non-financial interests that may be relevant to the  
4  
5 764 submitted work.  
6  
7  
8 765  
9  
10  
11 766 The Corresponding Author has the right to grant on behalf of all authors and does grant on  
12  
13 767 behalf of all authors, an exclusive license on a worldwide basis to the BMJ Publishing Group  
14  
15 768 Ltd and its Licensees to permit this article (if accepted) to be published in BMJ editions and  
16  
17 769 any other BMJ PGL products and sublicences to exploit all subsidiary rights, as set out in our  
18  
19 770 licence ( <http://resources.bmj.com/bmj/authors/checklists-forms/licence-for-publication>)."  
20  
21  
22  
23 771  
24  
25  
26

## Article Summary

### Article focus:

- The increasing prevalence of Multiple Sclerosis (MS), the limited efficacy and the side effects of the existing treatments urge the clinical need for the development of new, innovative, more effective, safe, and preventive treatment strategies.
- For the first time we propose three original nutraceutical treatment intervention-cocktails, formulated based on systems medicine through nutritional systems biology rational; with PLP10 representing the complete composition of the formulation and the other two treatments represent partial formulations.
- We have studied the proposed interventions on 80 relapsing remitting MS patients (four groups of 20 each) for a total of 42 months, in a randomized, double-blind, placebo-controlled, phase II proof-of-concept clinical trial.

**Key messages:**

- The per-protocol data analyses indicated that PLP10 is associated with significant efficacy **versus** placebo on both reducing the annualized relapse rate and disease progression without **any adverse or severe side effects**.
- PLP10 has probably the ability to interfere with the total known repertoire of mechanisms involved in MS pathogenesis as well as with the recovery mechanisms, neuroprotection and remyelination.; it is potentially able to manipulate global perturbed networks of the disease causing factors rather than focusing only on unique failing components.
- This proof-of-concept clinical study might be indicative and the beginning of new avenues in MS prevention and treatment and of new epoch of novel drug development with dynamic therapeutic potential for chronic complex multifactorial diseases.

**Strengths and limitations of this study:**

- The strength of this study is the systems medicine therapeutic approach, the length of the study the inclusion of the six months normalization (chronotherapy) period, and the study protocol following all indicated appropriate guidelines with definite inclusion/exclusion criteria and primary/secondary end points.
- The sample size and the high rate of drop-outs (palatability of the formula) are the limitations associated with the present study.
- A phase III multi-center clinical trial will establish the present intervention regime among the best choices among neurodegenerative diseases prophylaxis and MS treatment drugs faretra.

772

773 **References**

- 774 1. Baranzini SE, Oksenberg JR, Hauser SL. New insights into the genetics of multiple  
775 sclerosis. *Journal of Rehabilitation Research and Development* 2002;39:201-210.
- 776 2. Goni J, Esteban FJ, de Mendizabal NV, et al. A computational analysis of protein-  
777 protein interaction networks in neurodegenerative diseases. *BMC Syst Biol*  
778 2008;2:52.
- 779 3. Lobo I. Multifactorial inheritance and genetic disease. *Nature Education* 2008; 1.
- 780 4. Compston A, Coles A. Multiple sclerosis. *Lancet* 2002;359:1221.
- 781 5. Evans PH. Free radicals in brain metabolism and pathology. *British Medical Bulletin*  
782 1993;49:577-587.
- 783 6. Knight J. Reactive oxygen species and the neurodegenerative disorders. *Ann Clin Lab*  
784 *Sci* 1997;27:11-25.
- 785 7. Matute C, Alberdi E, Domercq M, Pérez-Cerdá F, Pérez-Samartín A, Sánchez-Gómez  
786 MV. The link between excitotoxic oligodendroglial death and demyelinating diseases.  
787 *Trends in Neurosciences* 2001;24:224-230.
- 788 8. Owens T. The enigma of multiple sclerosis: inflammation and neurodegeneration  
789 cause heterogeneous dysfunction and damage. *Current Opinion in Neurology*  
790 2003;16:259-265.
- 791 9. Smith KJ, Kapoor R, Felts PA. Demyelination: The role of reactive oxygen and  
792 nitrogen species. *Brain Pathology* 1999;9:69-92.
- 793 10. Ahn AC, Tewari M, Poon C-S, Phillips RS. The Clinical Applications of a Systems  
794 Approach. *PLoS Med* 2006;3:e209.
- 795 11. van Meeteren ME, Teunissen CE, Dijkstra CD, van Tol EAF. Antioxidants and  
796 polyunsaturated fatty acids in multiple sclerosis. *Eur J Clin Nutr* 2005;59:1347-1361.

- 1  
2  
3 797 12. Calder PC. n-3 Polyunsaturated fatty acids, inflammation, and inflammatory diseases.  
4  
5 798 The American Journal of Clinical Nutrition 2006;83:S1505-1519S.  
6  
7 799 13. Piani D, Fontana A. Involvement of the cystine transport system xc- in the  
8  
9 800 macrophage- induced glutamate-dependent cytotoxicity to neurons. The Journal of  
10  
11 801 Immunology 1994;152:3578-3585.  
12  
13 802 14. Youdim KA, Martin A, Joseph JA. Essential fatty acids and the brain: possible health  
14  
15 803 implications. International Journal of Developmental Neuroscience 2000;18:383-399.  
16  
17 804 15. Calder PC. Dietary modification of inflammation with lipids. Proceedings of the  
18  
19 805 Nutrition Society 2002;61:345-358.  
20  
21 806 16. Gil Á. Polyunsaturated fatty acids and inflammatory diseases. Biomedecine &  
22  
23 807 Pharmacotherapy 2002;56:388-396.  
24  
25 808 17. Ariel A, Serhan CN. Resolvins and protectins in the termination program of acute  
26  
27 809 inflammation. Trends in Immunology 2007;28:176-183.  
28  
29 810 18. Arita M, Ohira T, Sun Y-P, Elangovan S, Chiang N, Serhan CN. Resolvin E1  
30  
31 811 selectively interacts with leukotriene B4 receptor BLT1 and chemR23 to regulate  
32  
33 812 inflammation. The Journal of Immunology 2007;178:3912-3917.  
34  
35 813 19. Janakiram NB, Rao CV. Role of Lipoxins and Resolvins as Anti-Inflammatory and  
36  
37 814 Proresolving Mediators in Colon Cancer. Current Molecular Medicine 2009;9:565-  
38  
39 815 579.  
40  
41 816 20. Serhan C, Arita M, Hong S, Gotlinger K. Resolvins, docosatrienes, and  
42  
43 817 neuroprotectins, novel omega-3-derived mediators, and their endogenous aspirin-  
44  
45 818 triggered epimers. Lipids 2004;39:1125-1132.  
46  
47 819 21. Serhan CN, Chiang N, Van Dyke TE. Resolving inflammation: dual anti-  
48  
49 820 inflammatory and pro-resolution lipid mediators. Nat Rev Immunol 2008;8:349-361.  
50  
51  
52  
53  
54  
55  
56  
57  
58  
59  
60



- 1  
2  
3 821 22. Rossetti RG, Seiler C, DeLuca P, Laposata M, Zurier R. Oral administration of  
4  
5 822 unsaturated fatty acids: effects on human peripheral blood T lymphocyte proliferation.  
6  
7 823 Journal of Leukocyte Biology 1997;62:438-443.  
8  
9  
10 824 23. Vatassery G. Vitamin E and other endogenous antioxidants in the central nervous  
11  
12 825 system. Geriatrics 1998a;53:S25–S27.  
13  
14 826 24. Fukuzawa K, Gebicki JM. Oxidation of [alpha]-tocopherol in micelles and liposomes  
15  
16 827 by the hydroxyl, perhydroxyl, and superoxide free radicals. Archives of Biochemistry  
17  
18 828 and Biophysics 1983;226:242-251.  
19  
20  
21 829 25. Christen S, Woodall AA, Shigenaga MK, Southwell-Keely PT, Duncan MW, Ames  
22  
23 830 BN.  $\gamma$ -Tocopherol traps mutagenic electrophiles such as NO<sub>x</sub> and complements  $\alpha$ -  
24  
25 831 tocopherol: Physiological implications. Proceedings of the National Academy of  
26  
27 832 Sciences of the United States of America 1997;94:3217-3222.  
28  
29  
30 833 26. Brigelius-Flohé R, Kelly FJ, Salonen JT, Neuzil J, Zingg J-M, Azzi A. The European  
31  
32 834 perspective on vitamin E: current knowledge and future research. The American  
33  
34 835 Journal of Clinical Nutrition 2002;76:703-716.  
35  
36 836 27. Calder P. Polyunsaturated fatty acids, inflammatory processes and inflammatory  
37  
38 837 bowel diseases Mol Nutr Food Res 2008;52:885–897  
39  
40  
41 838 28. Edwards IJ, O'Flaherty JT. Omega-3 Fatty Acids and PPAR $\gamma$  in Cancer. PPAR  
42  
43 839 Research 2008;2008:1-15.  
44  
45 840 29. Groeger AL, Cipollina C, Cole MP, et al. Cyclooxygenase-2 generates anti-  
46  
47 841 inflammatory mediators from omega-3 fatty acids. Nat Chem Biol 2010;6:433-441.  
48  
49  
50 842 30. Dyall SC, Michael GJ, Michael-Titus AT. Omega-3 fatty acids reverse age-related  
51  
52 843 decreases in nuclear receptors and increase neurogenesis in old rats. Journal of  
53  
54 844 Neuroscience Research 2010;88:2091-2102.  
55  
56  
57  
58  
59  
60

- 1  
2  
3 845 31. McNamara RK. DHA Deficiency and Prefrontal Cortex Neuropathology in Recurrent  
4  
5 846 Affective Disorders. *The Journal of Nutrition* 2010;140:864-868.  
6  
7 847 32. Salvati S, Natali F, Attorri L, et al. Eicosapentaenoic acid stimulates the expression of  
8  
9 848 myelin proteins in rat brain. *Journal of Neuroscience Research* 2008;86:776-784.  
10  
11 849 33. Abraham M, Shapiro S, Karni A, Weiner HL, Miller A. Gelatinases (MMP-2 and  
12  
13 850 MMP-9) are preferentially expressed by Th1 vs. Th2 cells. *Journal of*  
14  
15 851 *Neuroimmunology* 2005;163:157-164.  
16  
17  
18 852 34. C ffrench-Constant. Pathogenesis of multiple sclerosis. *The Lancet* 1994;343:271-  
19  
20 853 275.  
21  
22  
23 854 35. Leppert D, Lindberg RLP, Kappos L, Leib SL. Matrix metalloproteinases:  
24  
25 855 multifunctional effectors of inflammation in multiple sclerosis and bacterial  
26  
27 856 meningitis. *Brain Research Reviews* 2001;36:249-257.  
28  
29 857 36. Curtis CL, Rees SG, Cramp J, et al. Effects of n-3 fatty acids on cartilage metabolism.  
30  
31 858 *Proceedings of the Nutrition Society* 2002;61:381-389.  
32  
33  
34 859 37. Harris MA, Hansen RA, Vidsudhiphan P, et al. Effects of conjugated linoleic acids  
35  
36 860 and docosahexaenoic acid on rat liver and reproductive tissue fatty acids,  
37  
38 861 prostaglandins and matrix metalloproteinase production. *Prostaglandins, Leukotrienes*  
39  
40 862 *and Essential Fatty Acids* 2001;65:23-29.  
41  
42  
43 863 38. McCabe A, Wallace J, Gilmore W, Strain J, McGlynn H. The effect of  
44  
45 864 eicosapentanoic acid on matrix metalloproteinase gene expression. *Lipids*  
46  
47 865 1999;34:S217-S218.  
48  
49 866 39. Shinto L, Marracci G, Bumgarner L, Yadav V. The Effects of Omega-3 Fatty Acids  
50  
51 867 on Matrix Metalloproteinase-9 Production and Cell Migration in Human Immune  
52  
53 868 Cells: Implications for Multiple Sclerosis. *Autoimmune Diseases* 2011;2011.

- 1  
2  
3 869 40. Auffray C, Chen Z, Hood L. Systems medicine: the future of medical genomics and  
4  
5 870 healthcare. *Genome Med* 2009;1:2.  
6  
7 871 41. Huang WL, King VR, Curran OE, et al. A combination of intravenous and dietary  
8  
9 872 docosahexaenoic acid significantly improves outcome after spinal cord injury. *Brain*  
10  
11 873 2007;130:3004-3019.  
12  
13 874 42. Marangoni F, Angeli MT, Colli S, et al. Changes of n – 3 and n – 6 fatty acids in  
14  
15 875 plasma and circulating cells of normal subjects, after prolonged administration of 20:5  
16  
17 876 (EPA) and 22:6 (DHA) ethyl esters and prolonged washout. *Biochimica et Biophysica*  
18  
19 877 *Acta (BBA) - Lipids and Lipid Metabolism* 1993;1210:55-62.  
20  
21 878 43. Martínez M, Vázquez E, García-Silva MT, et al. Therapeutic effects of  
22  
23 879 docosahexaenoic acid ethyl ester in patients with generalized peroxisomal disorders1.  
24  
25 880 *The American Journal of Clinical Nutrition* 2000;71:376S-385S.  
26  
27 881 44. Committee for medicinal products for human use. Guideline on clinical trials in small  
28  
29 882 populations In: *European Medicines Agency, 2006: 1-10.*  
30  
31 883 45. Gerard E Dallal. *The Little Handbook of Statistical Practice*. [online]. Available at  
32  
33 884 URL|. Accessed Date Accessed, Year|.  
34  
35 885 46. Wang YC, Meyerson L, Tang YQ, Qian N. Statistical methods for the analysis of  
36  
37 886 relapse data in MS clinical trials. *Journal of the Neurological Sciences* 2009;285:206-  
38  
39 887 211.  
40  
41 888 47. Polman CH, O'Connor PW, Havrdova E, et al. A randomized, placebo-controlled trial  
42  
43 889 of natalizumab for relapsing multiple sclerosis. *The New England Journal of*  
44  
45 890 *Medicine* 2006;354:899-910.  
46  
47 891 48. Kappos L, Radue E-W, O'Connor P, et al. A Placebo-Controlled Trial of Oral  
48  
49 892 Fingolimod in Relapsing Multiple Sclerosis. *New England Journal of Medicine*  
50  
51 893 2010;362:387-401.  
52  
53  
54  
55  
56  
57  
58  
59  
60

- 1  
2  
3 894 49. Cunnane S, Ho S, Dore-Duffy P, Ells K, Horrobin D. Essential fatty acid and lipid  
4  
5 895 profiles in plasma and erythrocytes in patients with multiple sclerosis. *The American*  
6  
7 896 *Journal of Clinical Nutrition* 1989;50:801-806.
- 8  
9  
10 897 50. Harbige LS, Sharief MK. Polyunsaturated fatty acids in the pathogenesis and  
11  
12 898 treatment of multiple sclerosis. *British Journal of Nutrition* 2007;98:S46-S53.
- 13  
14 899 51. Wilson R, Tocher D. Lipid and fatty acid composition is altered in plaque tissue from  
15  
16 900 multiple sclerosis brain compared with normal brain white matter. *Lipids* 1991;26:9-  
17  
18 901 15.
- 19  
20  
21 902 52. Rafat AS, Saame RS, Laura AS, Heidi RY, William S, Gary PZ. Omega 3-Fatty  
22  
23 903 Acids: Health Benefits and Cellular Mechanisms of Action. *Mini Reviews in*  
24  
25 904 *Medicinal Chemistry* 2004;4:859-871.
- 26  
27 905 53. Shaikh SR, Edidin M. Polyunsaturated fatty acids, membrane organization, T cells,  
28  
29 906 and antigen presentation. *The American Journal of Clinical Nutrition* 2006;84:1277-  
30  
31 907 1289.
- 32  
33  
34 908 54. Lajtha A, Toth J, Fujimoto K, Agrawal CH. Turnover of Myelin Proteins in Mouse  
35  
36 909 Brain in vivo. *Biochem J* 1977;164:323-329.
- 37  
38 910 55. LeBaron FN, Sanyal S, Jungalwala FB. Turnover rate of molecular species of  
39  
40 911 sphingomyelin in rat brain. *Neurochemical Research* 1981;6:1081-1089.
- 41  
42  
43 912 56. Yao JK. Increased polyunsaturated fatty acids in developing and regenerating  
44  
45 913 peripheral nerve. *Biochimica et Biophysica Acta (BBA) - Lipids and Lipid*  
46  
47 914 *Metabolism* 1982;712:542-546.
- 48  
49 915 57. Riccio P. The molecular basis of nutritional intervention in multiple sclerosis: a  
50  
51 916 narrative review. *Complement Ther Med* 2011;19:228-237.
- 52  
53  
54 917 58. Farinotti M, Simi S, Di Pietrantonj C, McDowell N, et al. Dietary interventions for  
55  
56 918 multiple sclerosis (Review), the Cochrane Library 2007, issue I.
- 57  
58  
59  
60

1  
2  
3 919 **Figure legends**  
4  
5

6 920 **Figure 1.** Omega-6 and omega-3 PUFA, their respective metabolic derivatives and their  
7  
8 921 possible effects on inflammation.

9  
10  
11 922 After consumption, the PUFAs are metabolized via several pathways (not shown) to active  
12  
13 923 compounds that mediate inflammation and products that promote resolution of inflammation.

14  
15  
16  
17 924 Abbreviations: PL, phospholipid; IFN- $\gamma$ , interferon  $\gamma$ ; IL-2, interleukin 2; NF $\kappa$ B, nuclear  
18  
19 925 factor kappa B; PGE<sub>2</sub>, prostaglandin E<sub>2</sub>; PPAR $\gamma$ , peroxisome proliferator-activated receptor  
20  
21 926  $\gamma$ ; PUFAs, polyunsaturated fatty acids; TGF $\beta$ , transforming growth factor  $\beta$ ; TNF, tumor  
22  
23 927 necrosis factor; COX, cyclooxygenase; hydroxyeicosatetraenoic acid; HPETE,  
24  
25 928 hydroperoxyeicosatetraenoic acid; LOX, lipoxygenase; LT, leukotriene; PG, prostaglandin;  
26  
27 929 TX, thromboxane; RXR- $\gamma$ , retinoid X receptor-gamma; Nrf2, nuclear respiratory factor;  
28  
29 930 MMP, metalloproteinase.  
30  
31  
32

33  
34 931 **Figure 2.** Study Flowchart

35  
36  
37 932 **Figure 3.** Panel A demonstrates the ARR of all-time on-study patients during the 24mo pre-  
38  
39 933 treatment (baseline ARR) and at different on-study intervals (6, 12, 18, 24 mo) per treatment  
40  
41 934 arm. \*\*

42  
43  
44 935 Panel B demonstrates the ARR of all-time on-study population between 0-6, 6-12, 6-18, and  
45  
46 936 6-24 mo period intervals, of PLP10 vs. placebo group. \*\*

47  
48  
49 937 Panel C demonstrates the ARR of all-time on-study population of PLP10 vs. placebo group at  
50  
51 938 baseline, during 1<sup>st</sup> year, and during the 2-year on-treatment. \*\*

52  
53  
54  
55 939 Panel D demonstrates the dispersion of relapses throughout the 2-year period of all-time on-  
56  
57 940 study (excluding patients on natalizumab) of PLP10 (n=10) vs. placebo (n=10). Placebo  
58  
59  
60

1  
2  
3 941 shows an irregular dispersion of relapses in relation to PLP10 group with linear increasing  
4  
5 942 trend while PLP10 shows a stabilized linear trend. By using the per-protocol model where  
6  
7 943 patients on natalizumab were excluded, we could compare the number of relapses on a same  
8  
9 944 number of patients.

10  
11  
12  
13 945 \*\* Including the patients on natalizumab.

14  
15  
16 946 **Figure 4.** Panel 4A demonstrates the Kaplan–Meier plot of the time to sustained progression  
17  
18 947 of disability among all-time on-study patients, excluding patients on natalizumab, receiving  
19  
20 948 intervention A, PLP10 and C as compared with placebo. PLP10 reduced the risk of sustained  
21  
22 949 progression of disability by 86% over two years (p=0.006). Intervention formula A reduced  
23  
24 950 the risk of sustained progression of disability by 53% (p=0.266) and intervention formula C  
25  
26 951 by 67% (p=0.061).

27  
28  
29  
30 952 Panel 4B demonstrates the Kaplan–Meier plot of the time to sustained progression of  
31  
32 953 disability among ITT population receiving intervention A, PLP10 and C as compared with  
33  
34 954 placebo. PLP10 reduced the risk of sustained progression of disability by 71% over two years  
35  
36 955 (p=0.052, trend). Intervention formula A reduced the risk of sustained progression of  
37  
38 956 disability by 22% (p=0.727) and intervention formula C by 40% (p=0.447).

39  
40  
41 957 **Figure 5.** Mean change in expanded disability status scale score as a function of visit  
42  
43 958 number. Values are expressed as mean ± s.e.m.

44  
45  
46  
47 959 ¶ Including patients on natalizumab

48  
49  
50 960 ¶¶ Excluding patients on natalizumab

51  
52  
53 961

## Omega-6 and omega-3 PUFA Consumption through Diet

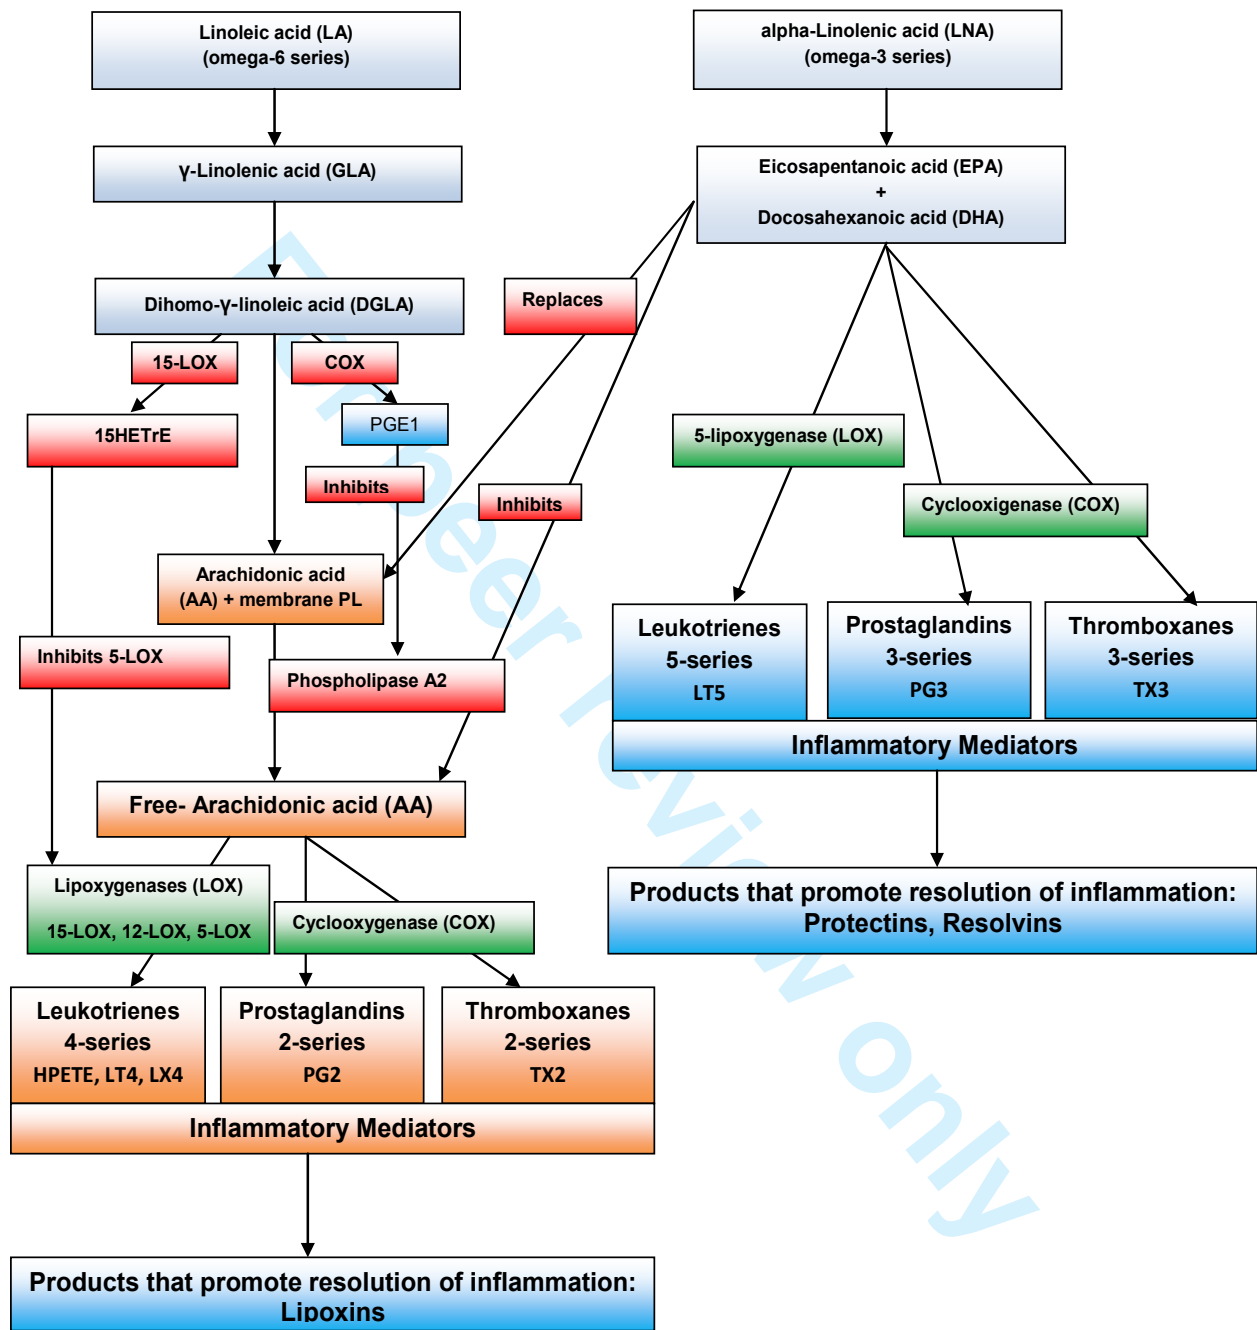

**Possible effects on inflammation:**  
 Reduce IFN- $\gamma$  production; Reduce IL-2 production; Increase TGF $\beta$  activity; Increase PGE2 activity; Inhibit arachidonic acid; Reduce TNF levels; RXR- $\gamma$  and PPAR $\gamma$  agonist; NF $\kappa$ B expression; stimulate Nrf2; reduce MMP-2, -3, -9, and -13

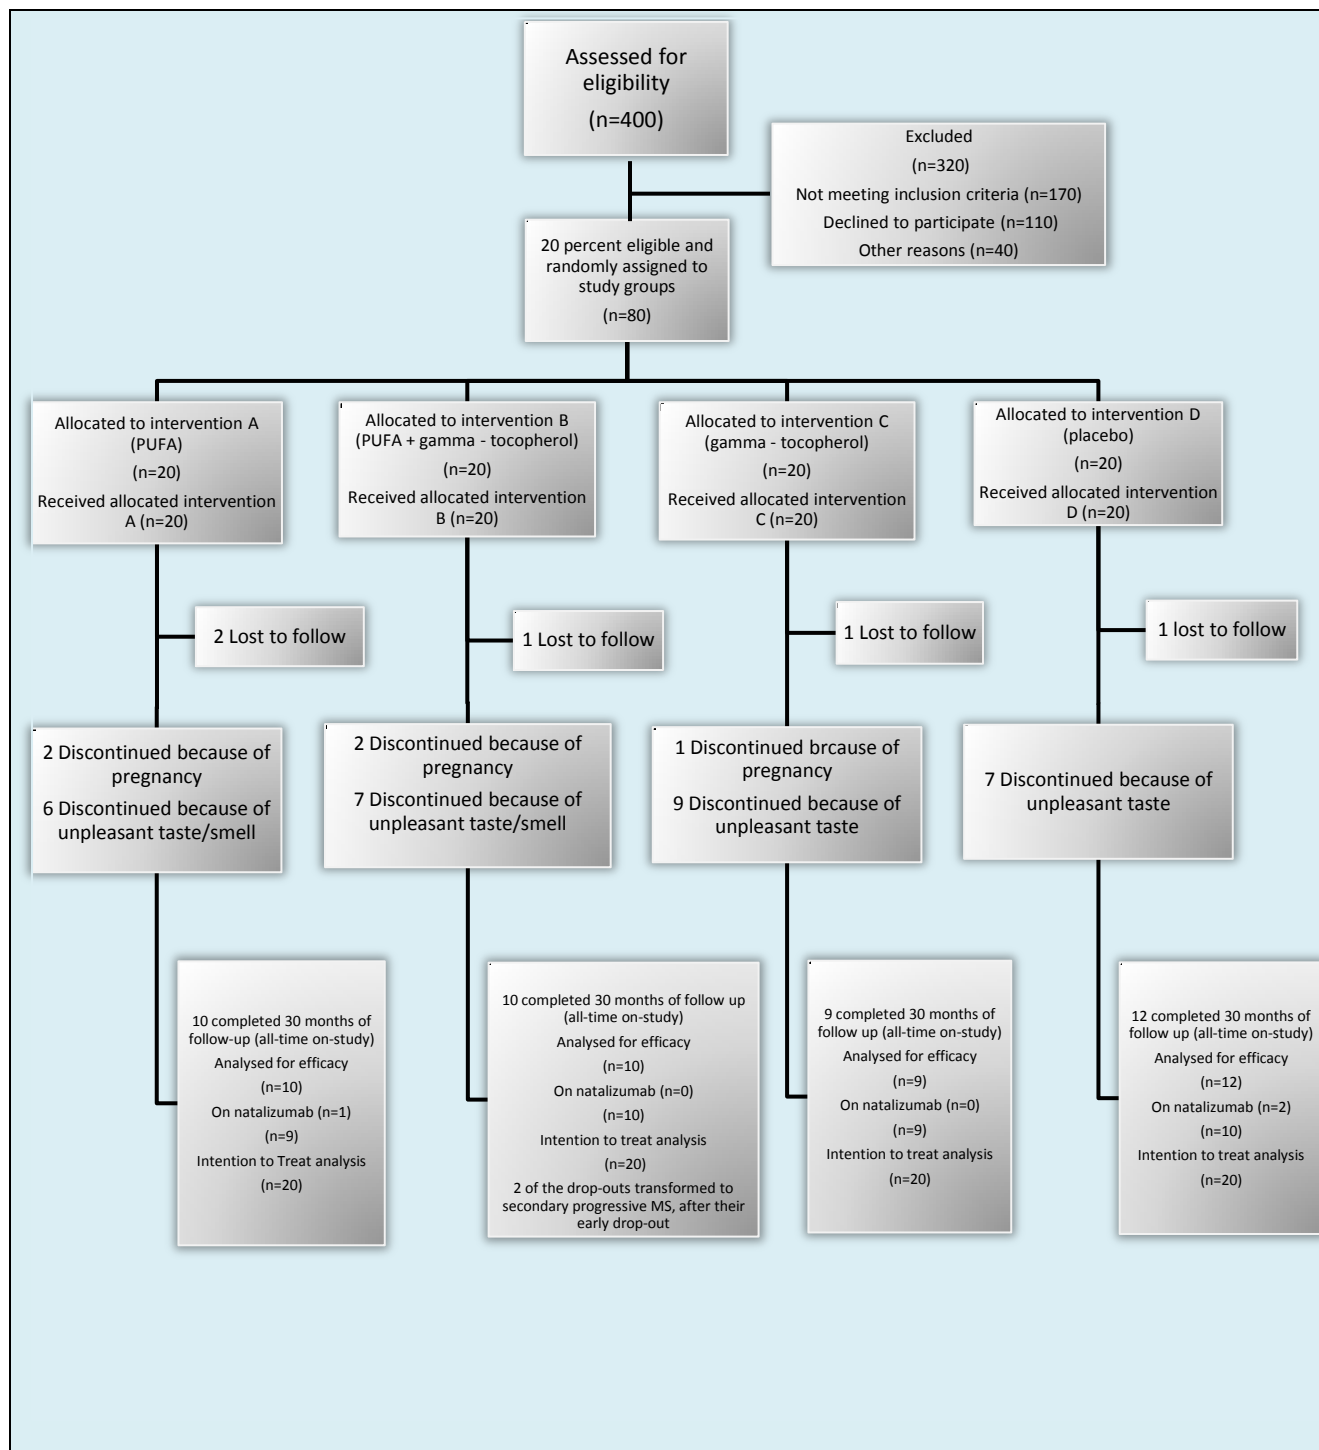



1  
2  
3  
4  
5  
6  
7  
8  
9  
10  
11  
12  
13  
14  
15  
16  
17  
18  
19  
20  
21  
22  
23  
24  
25  
26  
27  
28  
29  
30  
31  
32  
33  
34  
35  
36  
37  
38  
39  
40  
41  
42  
43  
44  
45  
46  
47  
48  
49  
50  
51  
52  
53  
54  
55  
56  
57  
58  
59  
60

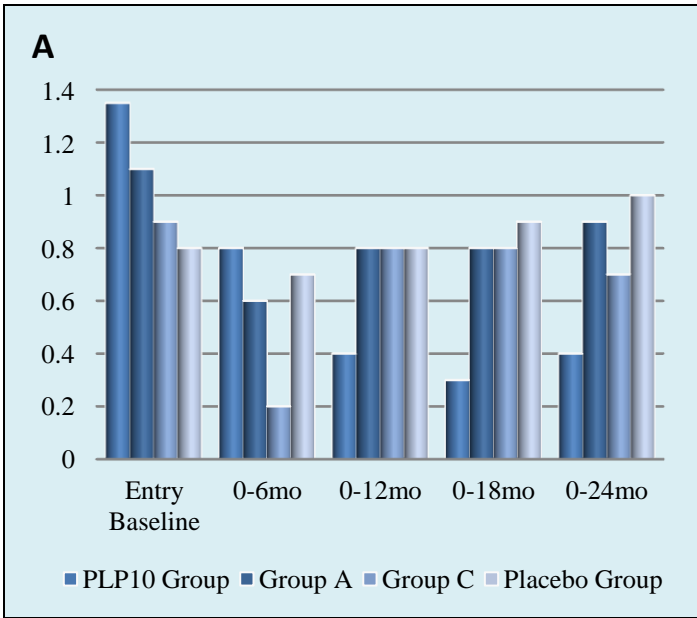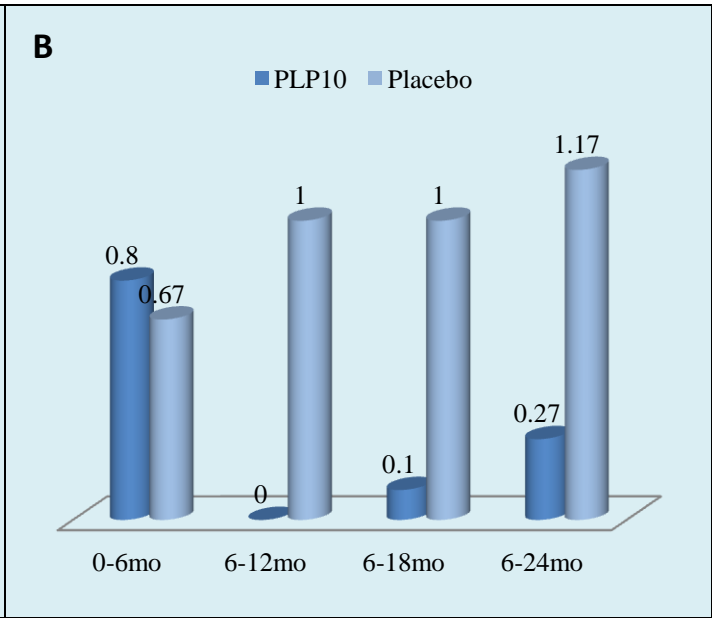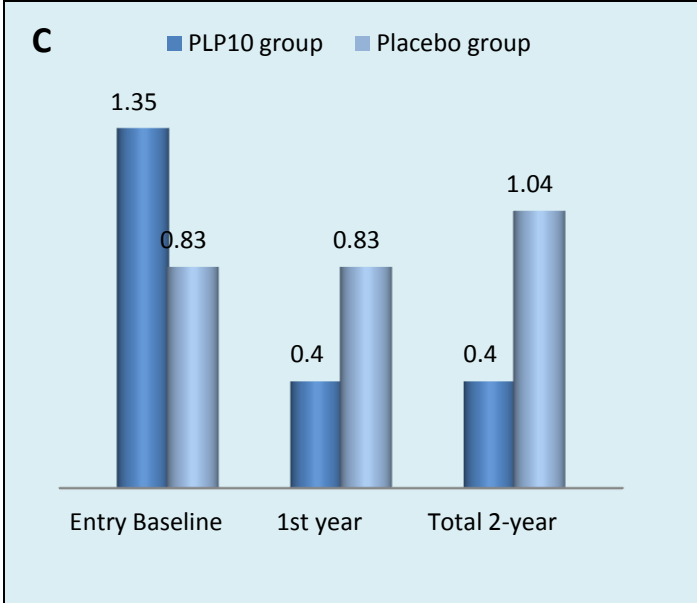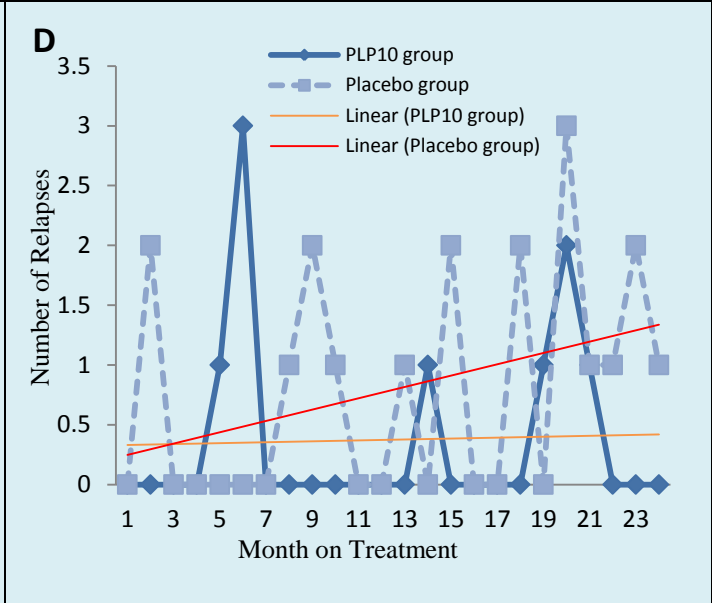

Only

1  
2  
3  
4  
5  
6  
7  
8  
9  
10  
11  
12  
13  
14  
15  
16  
17  
18  
19  
20  
21  
22  
23  
24  
25  
26  
27  
28  
29  
30  
31  
32  
33  
34  
35  
36  
37  
38  
39  
40  
41  
42  
43  
44  
45  
46  
47  
48  
49  
50  
51  
52  
53  
54  
55  
56  
57  
58  
59  
60

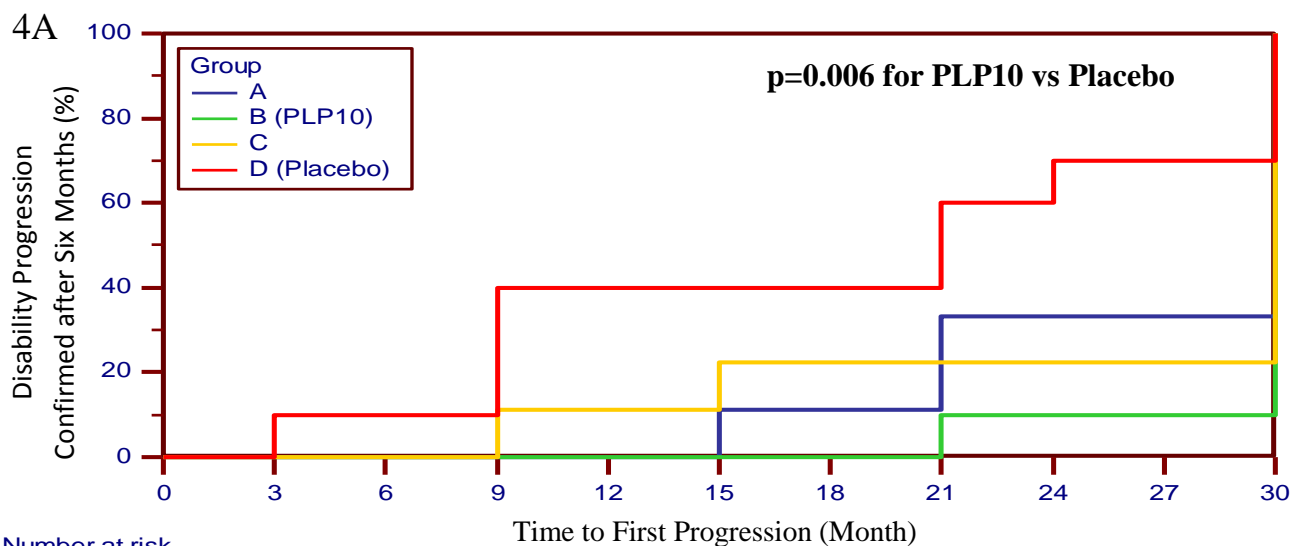

Number at risk

|                    |    |    |    |    |    |    |   |   |   |   |
|--------------------|----|----|----|----|----|----|---|---|---|---|
| Group: A           | 9  | 9  | 9  | 9  | 8  | 8  | 6 | 6 | 6 | 6 |
| Group: B (PLP10)   | 10 | 10 | 10 | 10 | 10 | 10 | 9 | 9 | 9 | 9 |
| Group: C           | 9  | 9  | 9  | 8  | 8  | 7  | 7 | 7 | 7 | 7 |
| Group: D (Placebo) | 10 | 9  | 9  | 6  | 6  | 6  | 4 | 3 | 3 | 3 |

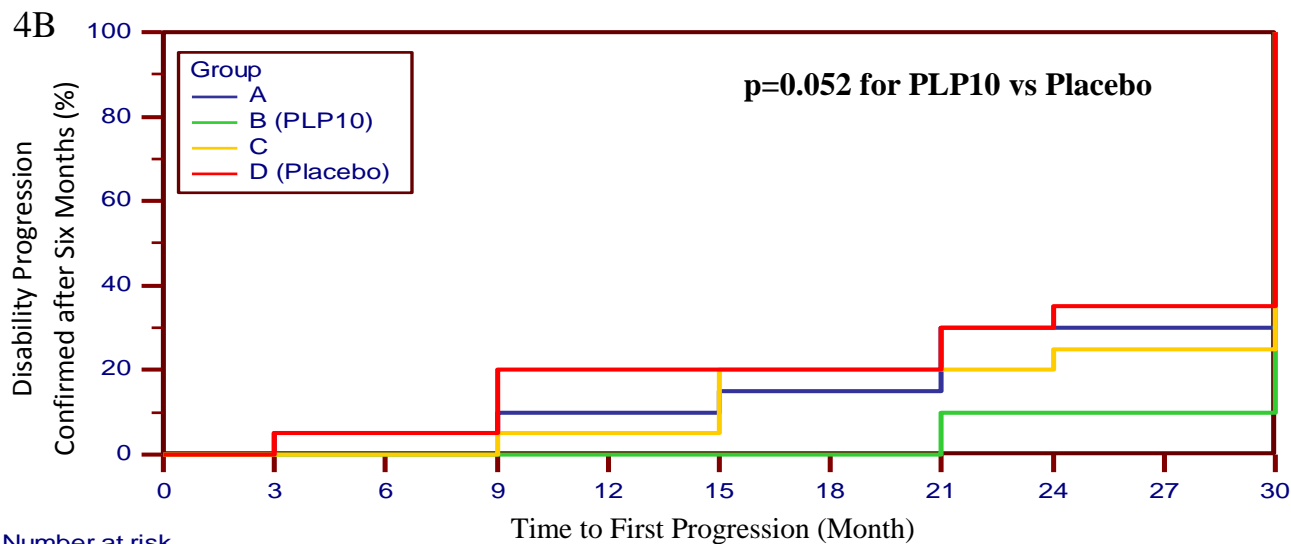

Number at risk

|                    |    |    |    |    |    |    |    |    |    |    |    |
|--------------------|----|----|----|----|----|----|----|----|----|----|----|
| Group: A           | 20 | 19 | 19 | 18 | 18 | 17 | 17 | 14 | 14 | 14 | 14 |
| Group: B (PLP10)   | 20 | 20 | 20 | 20 | 20 | 20 | 20 | 18 | 18 | 18 | 18 |
| Group: C           | 20 | 20 | 20 | 19 | 19 | 16 | 16 | 16 | 15 | 15 | 15 |
| Group: D (Placebo) | 20 | 19 | 19 | 16 | 16 | 16 | 16 | 14 | 13 | 13 | 13 |

1  
2  
3  
4  
5  
6  
7  
8  
9  
10  
11  
12  
13  
14  
15  
16  
17  
18  
19  
20  
21  
22  
23  
24  
25  
26  
27  
28  
29  
30  
31  
32  
33  
34  
35  
36  
37  
38  
39  
40  
41  
42  
43  
44  
45  
46  
47  
48  
49  
50  
51  
52  
53  
54  
55  
56  
57  
58  
59  
60

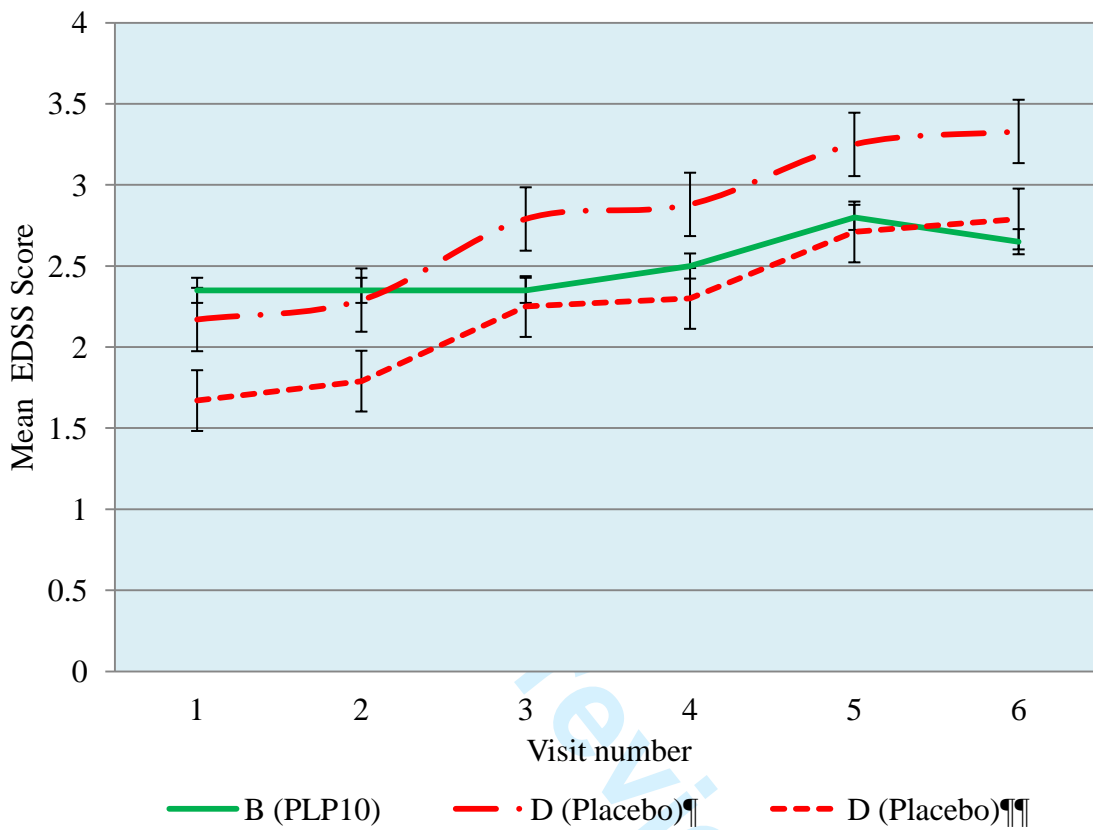

1  
2  
3 **1 Supplementary Information**  
4

5 **2 Table of Content**  
6  
7

| <b>Supplementary Section</b>        | <b>Page</b> |
|-------------------------------------|-------------|
| Supplementary Information Methods 1 | <b>2-4</b>  |
| Supplementary Information Methods 2 | <b>5-6</b>  |
| Supplementary Information Figure 1  | <b>7</b>    |
| Supplementary Information Figure 2  | <b>8</b>    |

8  
9  
10  
11  
12  
13  
14  
15  
16  
17  
18  
19  
20  
21 4  
22 5  
23 6  
24 7  
25 8  
26 9  
27 10  
28 11  
29 12  
30 13  
31 14  
32 15  
33 16  
34 17  
35 18  
36 19  
37 20  
38 21  
39 22  
40 23  
41 24  
42 25  
43 26  
44 27  
45 28  
46 29  
47 30  
48 31  
49 32  
50 33  
51  
52  
53  
54  
55  
56  
57  
58  
59  
60

### 34 **Supplementary Information Methods 1**

35 **Intervention and study rational.** We are using high dosage of 1:1 omega-3:omega-6  
36 polyunsaturated (PUFA) aiming to overpass and normalize global diet regional traditions and  
37 habits in relation to abnormal PUFA/saturated fatty acids (SFA)/monounsaturated fatty acids  
38 (MUFA) daily ratio consumption irrespective of the quantities consumed; and enough to  
39 equilibrate patients' diet in line with the recommended more physiologic omega-3:omega-6  
40 ratio of about 1:1-4 wt/wt as reported by Simopoulos, 2002. In addition to correct existing  
41 deficiencies, cell membrane abnormalities, specifically of the immunopathological system  
42 and blood mononuclear peripheral cells, and high enough for availability and immediate  
43 ongoing modulation of the involved pathogenic mechanisms and network of events in MS.  
44 The high dosage is also required to overpass the quantity limitations, previously discussed, of  
45 diet-consumed PUFAs for cellular incorporation, especially in the central nervous system  
46 (CNS) of adults. Additionally, fatty acids (FAs) must first cross the intestinal epithelium  
47 before reaching the different tissues, where digestion and absorption constitute further  
48 problems in their availability (Carlier, H, 1991). Omega-3 PUFA are used in re-esterified  
49 form to eliminate unwanted disturbances, at the sides of action, by other fatty acids and  
50 molecules present in crude fish oils but also to increase the bioavailability of the FA since  
51 triglycerides have been shown to be associated with much higher bioavailability (Dyerberg et  
52 al, 2010). Linoleic (LA) and gamma linolenic acid (GLA) are essential structure molecules  
53 and important for any physiological (re)generation of cell membrane. GLA quantity is  
54 doubled to LA to ensure high direct production of dihomo-gamma-linolenic acid (DGLA),  
55 from GLA when LA cannot be metabolized, due to desaturase deficiency or malfunction.  
56 Such a reduced capacity to convert LA to GLA has been associated with aging, diabetes,  
57 alcoholism, atopic dermatitis, premenstrual syndrome, rheumatoid arthritis, cancer and  
58 cardiovascular diseases (Bolton-Smith et al, 1997; Horrobin, 1990; Leventhal et al, 1993).  
59 This is going to result in the increase of DGLA relative to arachidonic acid (AA) with DGLA  
60 promoting production of prostaglandin (PG)E1 but also inhibition of phospholipase (PL)A2:  
61 two major reasons and rational for their use. If other metabolic problems are involved within  
62 the omega-6 series and the normal metabolites are not produced then the eicosapentaenoic  
63 acid EPA available in PLP10 will substitute the function of DGLA, as a competitive inhibitor  
64 of AA for PLA2. In both cases the pro-inflammatory leucotrienes, prostaglandines of the 2-  
65 series (PG2) and thromboxanes of the 2 series including the platelet-activator factor (PAF)  
66 will be attenuated. The synthesis of AA from DGLA by  $\Delta 5$  desaturase promoted by LA/GLA  
67 supplementation is very limited in humans as a result of limited activity of the enzyme  
68 (Yang-Yi & Robert, 1998). AA in the body is mostly available through diet. EPA and  
69 docosahexaenoic acid (DHA) are both physiologically important and crucial structured  
70 molecules able to substitute excess AA and SFA within the cell membranes. EPA will  
71 contribute to the inhibition (competitive to AA) of PLA2, joining the co-supplied omega-6  
72 PUFA but will also participate in the production of anti-inflammatory leukotrienes,  
73 prostaglandins of the 3-series (PG3) and thromboxane (TX3) along with DHA, both found in  
74 the PLP10 intervention. Moreover EPA will replace AA of the membrane phospholipids and  
75 both omega-3 PUFA will contribute replacing abnormal quantities of SFA and excess AA.  
76 DHA is used in 3:1 ratio to EPA to cover any possible inabilities of EPA to be metabolized,  
77 high enough to strongly promote high production of the aforementioned anti-inflammatory

1  
2  
3 78 eicosanoids and cytokines and to be incorporated into CNS cell membranes where DHA  
4 79 should be the major PUFA present, replacing other FA, probably saturated and excess of AA.  
5 80 EPA, DHA, LA and GLA along with the rest of the other ingredients used (“other” omega-3  
6 81 PUFA, SFA and MUFA that are usually found in the cell membranes of healthy people in  
7 82 limited quantities) in the intervention regimen are for their availability as minor structural  
8 83 constituents of physiological cellular membranes integrity, fluidity and overall function as  
9 84 building blocks for myelin repair and/or myelination. Furthermore the PUFA used within the  
10 85 cocktail intervention aimed to manipulate all other pathophysiological pathways that are  
11 86 reported to be able to: as previously discussed including gene transcription for  
12 87 neuroprotection and remyelination. Furthermore, PUFA are used to ensure the integrity of  
13 88 blood brain barrier (BBB) and to modulate the gelatinases responsible for the T cell migration  
14 89 within the CNS. Three different antioxidant vitamins (vitamin E, mostly as alpha-tocopherol,  
15 90 gamma ( $\gamma$ )-tocopherol (vitamin E isoform) and vitamin A) are used in the regimen  
16 91 preparation to support the cellular antioxidant defenses but also to protect peroxidation of the  
17 92 supplied increased amounts of PUFA. Alpha-tocopherol low-molecular-weight antioxidants  
18 93 will contribute to radical scavenging, interfering with gene transcription, protein expression,  
19 94 enzyme activity and metal chelation (van Meeteren et al, 2005). Vitamin E (alpha tocopherol)  
20 95 and vitamin A are used as antioxidants for the protection of the excess supplemented PUFA,  
21 96 with alpha-tocopherol been demonstrated to protect against peroxynitrite-induced oxidative  
22 97 damage, as well as able to efficiently detoxify hydroxyl, perhydroxyl and superoxide free  
23 98 radicals (the elevated reactive oxygen species (ROS)); each one with different mechanism of  
24 99 action, increasing the effect capability (Vatassery et al, 1998b; van Meeteren, 2005). Gamma-  
25 100 tocopherol is used in high dosage since its half life is very short compared to alpha-  
26 101 tocopherol and has been demonstrated to specifically protect against nitro-radicals.  
27 102 Tocopherols can also exert non-antioxidant properties, including modulation of cell signaling  
28 103 and immune function, regulation of transcription, and induction of apoptosis as previously  
29 104 discussed (van Meeteren et al, 2005).

30  
31  
32  
33  
34  
35  
36  
37  
38  
39 105 PLP10 is the first preparation ever developed for MS therapy that is composed by the use of  
40 106 all different previously discussed PUFA, MUFA, SFA in a cocktail preparation mixed with  
41 107 the specific aforementioned antioxidant vitamins that have never been all together used  
42 108 before within a specific formulation. The ingredients ratio, quality, structural form and  
43 109 mostly the high dosage has never been before tested. Furthermore, the knowledge and  
44 110 chronotherapy as well as other unique limitations associated with the individual molecules  
45 111 used, have never been accounted, discussed, proposed or reported for any previous  
46 112 therapeutic regimen.

47  
48  
49  
50 113 Through systems medicine therapeutic philosophy, by the use of PLP10, potentially MS  
51 114 patients have the opportunity to be treated holistically, by natural source isolated molecules,  
52 115 demonstrated as able of affecting and modulating all known pathophysiological,  
53 116 immunopathological, habitual, gene related factors; thus the dynamic interconnected complex  
54 117 network of events simultaneously. Possibly synergistic effects between PLP10 ingredients are  
55 118 also feasible. Moreover we can speculate that treatment efficacy of PLP10, when used as

- 1  
2  
3 119 adjunct to existing pharmaceuticals produced by reductionism, can be proven therapeutically  
4 120 superior to any available treatment for MS.  
5  
6 121  
7  
8 122 Bolton-Smith C, Woodward M, Tavendale R (1997) Evidence for age-related differences in  
9 123 the fatty acid composition of human adipose tissue, independent of diet. *European Journal of*  
10 124 *Clinical Nutrition* **51**: 619-624  
11  
12 125  
13 126 Carlier H, Bernard A, Caselli C (1991) Digestion and absorption of polyunsaturated fatty  
14 127 acids. *Reproduction, nutrition, development* **31**: 475-500  
15  
16 128  
17 129 Dyerberg J, Madsen P, Møller JM, Aardestrup I, Schmidt EB (2010) Bioavailability of  
18 130 marine n-3 fatty acid formulations. *Prostaglandins, leukotrienes, and essential fatty acids* **83**:  
19 131 137-141  
20  
21 132  
22 133 Horrobin DF (1990) Gamma-linolenic acid. *Rev Contemp Physiol* **1**: 1-41  
23  
24 134  
25 135 Leventhal LJ, Boyce EG, Zurier RB (1993) Treatment of rheumatoid arthritis with  
26 136 gammalinolenic acid. *Annals of Internal Medicine* **119**: 867-873  
27  
28 137  
29 138 Simopoulos AP (2002) The importance of the ratio of omega-6/omega-3 essential fatty acids.  
30 139 *Biomedicine & Pharmacotherapy* **56**: 365-379  
31  
32 140  
33 141 van Meeteren ME, Teunissen CE, Dijkstra CD, van Tol EAF (2005) Antioxidants and  
34 142 polyunsaturated fatty acids in multiple sclerosis. *Eur J Clin Nutr* **59**: 1347-1361  
35  
36 143  
37 144 Yang-Yi F, Robert SC (1998) Importance of Dietary g-Linolenic acid in human health and  
38 145 nutrition. *The Journal of Nutrition* **128**: 1411-1414  
39  
40 146  
41 147 Vatassery GT, Smith WE, Quach HT (1998b) Alpha-tocopherol in rat brain subcellular  
42 148 fractions is oxidized rapidly during incubations with low concentrations of peroxynitrite.  
43 149 *Journal of Nutrition* **128**: 152-157.  
44  
45 150  
46 151  
47 152  
48 153  
49 154  
50 155  
51 156  
52 157  
53 158  
54 159  
55  
56  
57  
58  
59  
60

## 160 **Supplementary Information Methods 2**

161 **Interventions specifications.** The specific omega-3 (re-esterified glycerides) and omega-6  
162 (glycerides) raw materials were purchased according to the required interventions' PUFA-  
163 fraction specification (molecular structure, quantity/ratio and quality) with vitamin E (alpha-  
164 tocopherol) used as antioxidant stabilizer by the supplier. The vitamins and masking aroma  
165 were purchased separately. The mixing of fractions to the final required intervention-  
166 composition specification was always performed by the same team of scientists under the  
167 supervision of the involved medical biochemist and lipidology specialist, under appropriate  
168 conditions every six months. Interventions were stored refrigerated in dark until use.

169  
170 The ratios of the different ingredients used were as follows: omega-3, EPA to DHA (about 1  
171 to 3 wt/wt), omega-6, LA to GLA (about 2 to 1 wt/wt), omega-3 (EPA + DHA) to omega-6  
172 (LA + GLA) (about 1 to 1 wt/wt). The total omega-3 (EPA + DHA + "other" omega-3  
173 PUFA) used as re-esterified triglycerol (minimum value 60%), diglyceride (about 33%),  
174 monoglyceride (about 2%) structural form mixture and about 2% ethyl ester structural form,  
175 with no less than 80% re-esterified triglycerol content to be DHA and EPA as a result of  
176 PUFA triglycerides re-esterification of fish body oils. The "other" group of omega-3 on the  
177 re-esterified glycerols included the 18:3 (alpha-linolenic acid), 18:4 (stearidonic acid), 20:4  
178 (eicosatetraenoic acid) and 22:5 (docosapentaenoic acid) PUFA. The fraction of omega-6  
179 (LA + GLA) used as triglycerides with no less than 50-65% triglycerol content to be LA and  
180 GLA in a ratio of 2 to 1 with 18:1 (oleic acid) 14-20% and 20:1 (eicosenoic acid), 22:1  
181 (docosenoic acid), 24:1 (tetracosenic acid) as additional monounsaturated fatty acids and  
182 minor quantities of 16:0 (palmitic acid) 4-16%, 18:0 (stearic acid) 2-5% saturated fatty acids  
183 from Borage oil source. The vitamins used were vitamin A as beta-carotene, vitamin E  
184 (alpha-tocopherol) and pure gamma-tocopherol (vitamine E isoform). Citrus extract was used  
185 as masking aroma and pure virgin olive oil as delivery vehicle.

186  
187 **The daily intervention formula agent dosages were:**

188 **Intervention formula A** daily dosage: EPA (1650mg) / DHA (4650mg) / GLA (2000mg) /  
189 LA (3850mg) / total other omega-3 (600mg) / total monounsaturated fatty acids (MUFA)  
190 (18:1 1300mg, 20:1 250mg, 22:1 82mg, 24:1 82mg) + total saturated fatty acids (SFA) (18:0  
191 160mg, 16:0 650mg) / vitamin A (0.6mg) / vitamin E (22mg).

192 **Intervention formula B (PLP10)** daily dosage: EPA (1650mg) / DHA (4650mg) / GLA  
193 (2000mg) / LA (3850mg) / total other omega-3 (600mg) / total MUFA (18:1 1300mg, 20:1  
194 250mg, 22:1 82mg, 24:1 82mg) + total SFA (18:0 160mg, 16:0 650mg) / vitamin A (0.6mg) /  
195 vitamin E (22mg) / gamma- tocopherol ( $\gamma$ -tocopherol) (760 mg).

196 **Intervention formula C** daily dosage:  $\gamma$ -tocopherol (760 mg) (in 16137 mg pure virgin olive  
197 oil as a vehicle).

198 **Intervention formula D** daily dosage: pure virgin olive oil (16930mg).

199 Citrus aroma was added in each intervention formula to make up a total dosage of 19.5ml of  
200 solution per day.



1  
2  
3 201 The specific omega-3 related fraction, according to specifications required for the  
4 202 interventions was prepared and purchased from EPAX AS, Aalesund, Norway; as re-  
5 203 esterified glycerides from fish body oils as a source. The specific omega-6 PUFA, MUFA  
6 204 and SFA related fraction, according to required specifications, was prepared and purchased  
7 205 from Goerlich Pharma International GmbH, Edling, Germany, as triglycerides from Borage  
8 206 seed oil (organic, cold pressed) "*Borago officinalis*" as a source. Both omega-3 and omega-6  
9 207 fractions were delivered stabilized by the producer (vitamine E (alpha-tocopherol) ~ 4.5 mg/g  
10 208 was used as antioxidant).

14 209 Vitamins: vitamin A as beta-carotene (HealthAid Ltd., Middlesex, United Kingdom) and pure  
15 210 gamma-tocopherol (Tama Biochemical Co. Ltd., Shinjuku-ku Tokyo, Japan).

17 211 Citrus aroma (Givaudan Schwaiz AG, Dubendorf, Switzerland).

18  
19  
20 212

21  
22  
23 213

24  
25  
26  
27 214

28  
29  
30  
31 215

32  
33  
34 216

35  
36  
37 217

38  
39  
40  
41 218

42  
43  
44 219

45  
46  
47 220

48  
49  
50  
51 221

52  
53  
54 222

55  
56  
57  
58 223

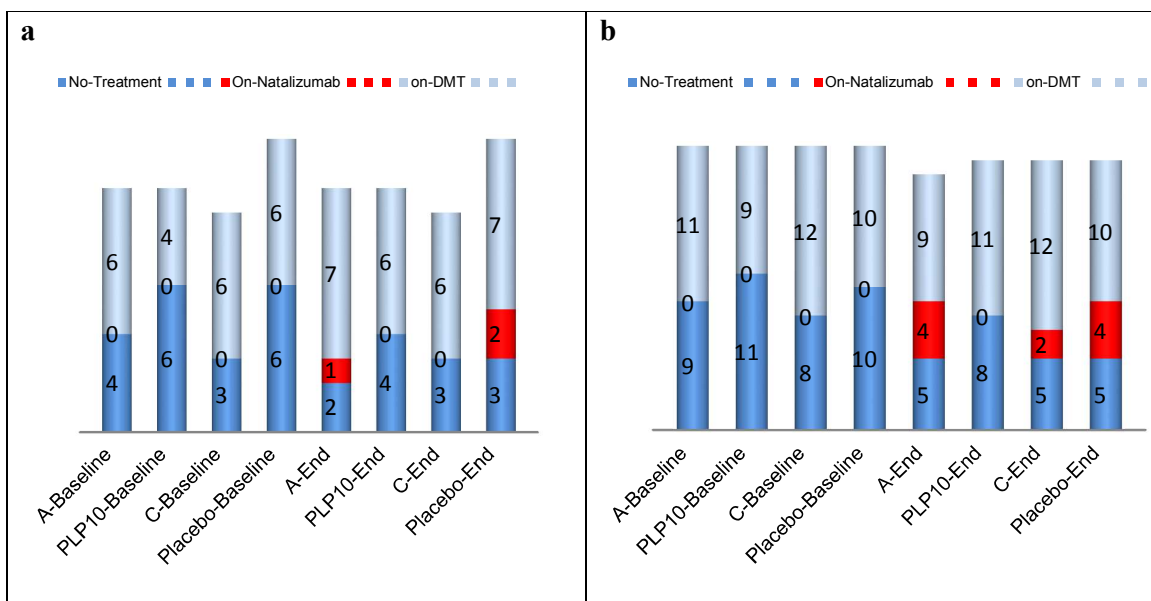

**Supplementary Information Figure 1 | Population on DMT and/or natalizumab.** (a) Demonstrates the all-time on-study population per treatment arm that was receiving or not receiving DMT at entry baseline and the same population at the end of the trial (including patients on natalizumab). No statistical significant differences were calculated. The all-time on-study patients per treatment-arm that were receiving DMT at entry baseline were six patients out of ten (60%) within group A, four out of ten (40%) within PLP10 group, six out of nine (66%) within group C and six out of 12 (50%) within placebo. When the study completed, 80% of the patients in group A, 60% in PLP10 group, 66% in group C and 75% of the patients in placebo ended up on treatment. Within group A one out of eight and within placebo two out of nine patients on DMT transferred on natalizumab. (b) Demonstrates the total randomized population per treatment arm that was receiving or not receiving DMT at entry baseline and the same population at the end of the trial without lost to follow (including patients on natalizumab). A total of 61% of group A patients were on DMT at entry baseline and became 72% at the end; for PLP10 group 41% and became 53%; for group C 73% and became 74% and for placebo 53% and became 74% at study completion. At the end: for group A, four out of 13 patients on DMT transferred on natalizumab; for PLP10 group no patient was on natalizumab; for Group C two out of 14 patients on DMT transferred on natalizumab; and for placebo group four out of the 14 patients on DMT transferred on natalizumab. No significant differences measured at entry baseline between the groups.

224

225

226

227

1  
2  
3  
4  
5  
6  
7  
8  
9  
10  
11  
12  
13  
14  
15  
16  
17  
18  
19  
20  
21  
22  
23  
24  
25  
26  
27  
28  
29  
30  
31  
32  
33  
34  
35  
36  
37  
38  
39  
40  
41  
42  
43  
44  
45  
46  
47  
48  
49  
50  
51  
52  
53  
54  
55  
56  
57  
58  
59  
60



228

229

### Checklist of Items for Reporting Trials of Nonpharmacologic Treatments\*

| Section                    | Item | Standard CONSORT Description                                                                                                                                                              | Extension for Nonpharmacologic Trials                                                                                                                                       | Reported on Page No.                   |
|----------------------------|------|-------------------------------------------------------------------------------------------------------------------------------------------------------------------------------------------|-----------------------------------------------------------------------------------------------------------------------------------------------------------------------------|----------------------------------------|
| <b>Title and abstract†</b> | 1    | How participants were allocated to interventions (e.g., “random allocation,” “randomized,” or “randomly assigned”)                                                                        | In the abstract, description of the experimental treatment, comparator, care providers, centers, and blinding status                                                        | 1,3,4                                  |
| <b>Introduction</b>        |      |                                                                                                                                                                                           |                                                                                                                                                                             |                                        |
| Background                 | 2    | Scientific background and explanation of rationale                                                                                                                                        |                                                                                                                                                                             | 5 to 8                                 |
| <b>Methods</b>             |      |                                                                                                                                                                                           |                                                                                                                                                                             |                                        |
| Participants†              | 3    | Eligibility criteria for participants and the settings and locations where the data were collected                                                                                        | When applicable, eligibility criteria for centers and those performing the interventions                                                                                    | 8, 13,15                               |
| Interventions†             | 4    | Precise details of the interventions intended for each group and how and when they were actually administered                                                                             | Precise details of both the experimental treatment and comparator                                                                                                           | 9,10,11, Table 1 p.28, Appendix p. 5,6 |
|                            | 4A   |                                                                                                                                                                                           | Description of the different components of the interventions and, when applicable, descriptions of the procedure for tailoring the interventions to individual participants | 10, Table 1 p.28, Appendix p.5         |
|                            | 4B   |                                                                                                                                                                                           | Details of how the interventions were standardized                                                                                                                          | 9,10, Table 1 p.28, Appendix p.5       |
|                            | 4C   |                                                                                                                                                                                           | Details of how adherence of care providers with the protocol was assessed or enhanced                                                                                       | 9                                      |
| Objectives                 | 5    | Specific objectives and hypotheses                                                                                                                                                        |                                                                                                                                                                             | 7,8                                    |
| Outcomes                   | 6    | Clearly defined primary and secondary outcome measures and, when applicable, any methods used to enhance the quality of measurements (e.g., multiple observations, training of assessors) |                                                                                                                                                                             | 12                                     |
| Sample size†               | 7    | How sample size was determined and, when applicable, explanation of any interim analyses and stopping rules                                                                               | When applicable, details of whether and how the clustering by care providers or centers was addressed                                                                       | 14                                     |

|                                        |          |                                                                                                                                                                                                                                                                                                                                        |                                                                                                                                                              |                         |
|----------------------------------------|----------|----------------------------------------------------------------------------------------------------------------------------------------------------------------------------------------------------------------------------------------------------------------------------------------------------------------------------------------|--------------------------------------------------------------------------------------------------------------------------------------------------------------|-------------------------|
| Randomization–<br>sequence generation† | 8        | Method used to generate the random allocation sequence, including details of any restriction (e.g., blocking, stratification)                                                                                                                                                                                                          | When applicable, how care providers were allocated to each trial group                                                                                       | 9                       |
| Allocation concealment                 | 9        | Method used to implement the random allocation sequence (e.g., numbered containers or central telephone), clarifying whether the sequence was concealed until interventions were assigned                                                                                                                                              |                                                                                                                                                              | 9                       |
| Implementation                         | 10       | Who generated the allocation sequence, who enrolled participants, and who assigned participants to their groups                                                                                                                                                                                                                        |                                                                                                                                                              | 9                       |
| Blinding (masking)†                    | 11A      | Whether or not participants, those administering the interventions, and those assessing the outcomes were blinded to group assignment                                                                                                                                                                                                  | Whether or not those administering co-interventions were blinded to group assignment                                                                         | 9,10                    |
|                                        | 11B      |                                                                                                                                                                                                                                                                                                                                        | If blinded, method of blinding and description of the similarity of interventions†                                                                           | 9,10,Appendix p.5       |
| Statistical methods†                   | 12       | Statistical methods used to compare groups for primary outcome(s); methods for additional analyses, such as subgroup analyses and adjusted analyses                                                                                                                                                                                    | When applicable, details of whether and how the clustering by care providers or centers was addressed                                                        | 13, 14, 15              |
| <b>Results</b>                         |          |                                                                                                                                                                                                                                                                                                                                        |                                                                                                                                                              |                         |
| Participant flow†                      | 13       | Flow of participants through each stage (a diagram is strongly recommended)--- specifically, for each group, report the numbers of participants randomly assigned, receiving intended treatment, completing the study protocol, and analyzed for the primary outcome; describe deviations from study as planned, together with reasons | The number of care providers or centers performing the intervention in each group and the number of patients treated by each care provider or in each center | 15 <b>Fig 2</b>         |
| Implementation of intervention†        | New item |                                                                                                                                                                                                                                                                                                                                        | Details of the experimental treatment and comparator as they were implemented                                                                                | 10,15,16 Appendix p..5, |
| Recruitment                            | 14       | Dates defining the periods of recruitment and follow-up                                                                                                                                                                                                                                                                                |                                                                                                                                                              | 11,15                   |
| Baseline data†                         | 15       | Baseline demographic and clinical characteristics of each group                                                                                                                                                                                                                                                                        | When applicable, a description of care providers (case volume, qualification, expertise, etc.) and centers (volume) in each group                            | 16,Table 2              |

|                         |    |                                                                                                                                                                                                           |                                                                                                                                                                       |          |
|-------------------------|----|-----------------------------------------------------------------------------------------------------------------------------------------------------------------------------------------------------------|-----------------------------------------------------------------------------------------------------------------------------------------------------------------------|----------|
| Numbers analyzed        | 16 | Number of participants (denominator) in each group included in each analysis and whether analysis was by “intention-to-treat”; state the results in absolute numbers when feasible (e.g., 10/20, not 50%) |                                                                                                                                                                       | 15,16    |
| Outcomes and estimation | 17 | For each primary and secondary outcome, a summary of results for each group and the estimated effect size and its precision (e.g., 95% confidence interval)                                               |                                                                                                                                                                       | 15 to 20 |
| Ancillary analyses      | 18 | Address multiplicity by reporting any other analyses performed, including subgroup analyses and adjusted analyses, indicating those prespecified and those exploratory                                    |                                                                                                                                                                       | 20       |
| Adverse events          | 19 | All important adverse events or side effects in each intervention group                                                                                                                                   |                                                                                                                                                                       | 20       |
| <b>Discussion</b>       |    |                                                                                                                                                                                                           |                                                                                                                                                                       |          |
| Interpretation†         | 20 | Interpretation of the results, taking into account study hypotheses, sources of potential bias or imprecision, and the dangers associated with multiplicity of analyses and outcomes                      | In addition, take into account the choice of the comparator, lack of or partial blinding, and unequal expertise of care providers or centers in each group            | 21       |
| Generalizability†       | 21 | Generalizability (external validity) of the trial findings                                                                                                                                                | Generalizability (external validity) of the trial findings according to the intervention, comparators, patients, and care providers and centers involved in the trial | 22       |
| Overall evidence        | 22 | General interpretation of the results in the context of current evidence                                                                                                                                  |                                                                                                                                                                       | 22 to 26 |

\*Additions or modifications to the CONSORT checklist. CONSORT = Consolidated Standards of Reporting Trials.

†This item was modified in the 2007 revised version of the CONSORT checklist.



**A novel oral nutraceutical formula (PLP10) for the treatment of relapsing remitting multiple sclerosis: a randomized, double-blind, placebo-controlled proof-of-concept clinical trial.**

|                                 |                                                                                                                                                                                                                                                                                                                                                                                                                                                                                                                                                   |
|---------------------------------|---------------------------------------------------------------------------------------------------------------------------------------------------------------------------------------------------------------------------------------------------------------------------------------------------------------------------------------------------------------------------------------------------------------------------------------------------------------------------------------------------------------------------------------------------|
| Journal:                        | <i>BMJ Open</i>                                                                                                                                                                                                                                                                                                                                                                                                                                                                                                                                   |
| Manuscript ID:                  | bmjopen-2012-002170.R2                                                                                                                                                                                                                                                                                                                                                                                                                                                                                                                            |
| Article Type:                   | Research                                                                                                                                                                                                                                                                                                                                                                                                                                                                                                                                          |
| Date Submitted by the Author:   | 04-Feb-2013                                                                                                                                                                                                                                                                                                                                                                                                                                                                                                                                       |
| Complete List of Authors:       | Pantzaris, Marios; The Cyprus Institute of Neurology and Genetics (CING), Clinic C and PALUPA Medical Ltd<br>Loukaides, George; The Cyprus Institute of Neurology and Genetics (CING), Neurology Clinic and PALUPA Medical Ltd<br>Ntzani, Evangelia; University of Ioannina School of Medicine (UISM), Clinical and Molecular Epidemiology Unit, Department of Hygiene and Epidemiology<br>Patrikios, Ioannis; The Cyprus Institute of Neurology and Genetics (CING), Clinic C and PALUPA Medical Ltd; European University Cyprus, Health Science |
| <b>Primary Subject Heading</b>: | Nutrition and metabolism                                                                                                                                                                                                                                                                                                                                                                                                                                                                                                                          |
| Secondary Subject Heading:      | Neurology, Complementary medicine, Pharmacology and therapeutics                                                                                                                                                                                                                                                                                                                                                                                                                                                                                  |
| Keywords:                       | Multiple sclerosis < NEUROLOGY, NUTRITION & DIETETICS, Neurophysiology < NEUROLOGY, COMPLEMENTARY MEDICINE, Neurobiology < BASIC SCIENCES, PUBLIC HEALTH                                                                                                                                                                                                                                                                                                                                                                                          |
|                                 |                                                                                                                                                                                                                                                                                                                                                                                                                                                                                                                                                   |

SCHOLARONE™  
Manuscripts

1 **A novel oral nutraceutical formula of omega-3 and omega-**  
2 **6 fatty acids with vitamins (PLP10) in relapsing remitting**  
3 **multiple sclerosis: a randomized, double-blind, placebo-**  
4 **controlled proof-of-concept clinical trial**

5 **Marios C. Pantzaris\***, **George N. Loukaides**, **Evangelia E. Ntzani**, **Ioannis**  
6 **S. Patrikios\***

7 \* Both M.C.P and I.S.P are the first authors and both are the corresponding authors

8  
9 The Cyprus Institute of Neurology and Genetics (CING) 1683 Nicosia, Cyprus Marios C.  
10 Pantzaris Senior Consultant Neurologist Neurology Clinic C and PALUPA Medical Ltd., The  
11 Cyprus Institute of Neurology and Genetics (CING) 1683 Nicosia, Cyprus George N.  
12 Loukaides Clinical Dietitian/Nutritionist Neurology Clinic and PALUPA Medical Ltd.,  
13 University of Ioannina School of Medicine (UISM) 45110 Ioannina, Greece Evangelia E.  
14 Ntzani Assistant Professor Clinical and Molecular Epidemiology Unit, Department of  
15 Hygiene and Epidemiology, PALUPA Medical Ltd at The Cyprus Institute of Neurology and  
16 Genetics (CING) 1683 Nicosia, Cyprus Ioannis S. Patrikios Senior Research Scientist,  
17 visiting Professor at European University Cyprus Nicosia, Cyprus, Department of Health and  
18 Science. Correspondence should be addresses to e-mail: [I.Patrikios@euc.ac.cy](mailto:I.Patrikios@euc.ac.cy) or  
19 [pantzari@cing.ac.cy](mailto:pantzari@cing.ac.cy)



1  
2  
3 22 **Correspondence to:**  
4

5 23 **Ioannis Patrikios**

6  
7 24 The Cyprus Institute of Neurology and Genetics (CING)

8  
9 25 Neurology Clinic C (PALUPA Medical),

10  
11 26 6 International Airport Av.

12  
13 27 P.O.Box 23462, 1683 Ayios Dometios. Nicosia, Cyprus

14  
15 28 Tel: +357 22 358 600, +357 99 097 856;

16  
17 29 [i.patrikios@euc.ac.cy](mailto:i.patrikios@euc.ac.cy)

18  
19 30 [patrikiosioannis@gmail.com](mailto:patrikiosioannis@gmail.com)  
20  
21  
22  
23  
24  
25  
26  
27  
28  
29  
30  
31

32 **AND**

33  
34 **Marios Pantzaris**

35 The Cyprus Institute of Neurology and Genetics (CING)

36 Neurology Clinic C (PALUPA Medical),

37 6 International Airport Av.

38 P.O.Box 23462, 1683 Ayios Dometios, Nicosia Cyprus

39 Tel: +357 22 358 600; +357 99 677 067

40 [pantzari@cing.ac.cy](mailto:pantzari@cing.ac.cy)  
41  
42  
43  
44  
45  
46  
47  
48  
49  
50  
51  
52  
53  
54  
55  
56  
57  
58  
59  
60

42 **Keywords:** antioxidant vitamins, polyunsaturated fatty acids, multiple sclerosis, systems  
43 medicine, randomized clinical trial.

45 **Word Count: 6299**

1  
2  
3 **Abstract**  
4

5 **Objective** To assess whether our three novel interventions, formulated based on systems  
6  
7  
8  
9  
10  
11  
12  
13  
14  
15  
16  
17  
18  
19  
20  
21  
22  
23  
24  
25  
26  
27  
28  
29  
30  
31  
32  
33  
34  
35  
36  
37  
38  
39  
40  
41  
42  
43  
44  
45  
46  
47  
48  
49  
50  
51  
52  
53  
54  
55  
56  
57  
58  
59  
60  
61  
62  
63  
64  
65  
66  
67  
68  
69  
70

medicine therapeutic concept reduce disease activity in patients with relapsing remitting multiple sclerosis who were either treated with disease modifying treatment or untreated.

**Design** 30-month randomized double-blind, placebo-controlled, parallel design, phase II proof-of-concept clinical study.

**Settings** Cyprus Institute of Neurology and Genetics (CING)

**Participants and Interventions** 80 subjects were randomized into four groups of 20. The first intervention (A) was composed of omega-3 and omega-6 polyunsaturated fatty acids at 1:1 wt/wt. Specifically, the omega-3 fatty acids were docosahexaenoic acid (DHA) and eicosapentaenoic acid (EPA) at 3:1 wt/wt and the omega-6 fatty acids were linoleic acid (LA) and gamma ( $\gamma$ )-linolenic acid (GLA) at 2:1 wt/wt. This intervention also included minor quantities of other specific polyunsaturated, monounsaturated and specific saturated fatty acids as well as vitamin A and vitamin E (alpha-tocopherol). The third intervention (C) was  $\gamma$ -tocopherol alone. The second intervention (PLP10) was a combination of A and C. A fourth group of 20 received a vehicle placebo. The interventions were administered per os once daily.

**Main outcome measures** The primary endpoint was the annualized relapse rate (ARR) of the three interventions versus placebo at two years. The secondary end point was the time to confirmed disability progression at two years.

1  
2  
3 71 **Results** A total of 41 (51%) patients completed the 42-month trial. Overall, for the per-  
4  
5 72 protocol analysis of the two-year primary end point, 8 relapses were recorded in the PLP10  
6  
7 73 group (n=10) (0.40 ARR) versus 25 relapses in the placebo group (n=12) (1.04 ARR), a 64%  
8  
9 74 adjusted relative rate reduction for the PLP10 group (RRR 0.36, 95% CI 0.15 to 0.87,  
10  
11 75 p=0.024). In a subgroup analysis that excluded patients on monoclonal antibody  
12  
13 76 (natalizumab) treatment, the observed adjusted RRR became stronger (72%) over the two  
14  
15 77 years (RRR 0.28, 95% CI 0.10 to 0.79, p=0.016). Per-protocol analysis for the secondary  
16  
17 78 outcome at two years, time to disability progression, was significantly longer only with  
18  
19 79 PLP10. The cumulative probability of disability progression at two years was 10% in the  
20  
21 80 PLP10 group and 58% in the placebo group (unadjusted log-rank p=0.019). In a subgroup  
22  
23 81 analysis that excluded patients on natalizumab the cumulative probability of progression was  
24  
25 82 10% for the 10 patients in the PLP10 group and 70% for the 12 patients in the placebo group,  
26  
27 83 a relative 86% decrease in the risk of sustained progression of disability in the PLP10 group  
28  
29 84 (unadjusted log-rank p=0.006; adjusted hazard ratio, 0.11; 95% CI 0.01 to 0.97, p=0.047). No  
30  
31 85 adverse events were reported. Interventions A (10 patients) and C (9 patients) showed no  
32  
33 86 significant efficacy.  
34  
35  
36  
37  
38  
39  
40  
41  
42  
43  
44  
45  
46  
47  
48  
49  
50  
51

52 88 **Conclusions** In this small proof-of-concept randomized double-blind clinical trial, PLP10  
53  
54 89 treatment significantly reduced the ARR, and the risk of sustained disability progression  
55  
56 90 without any reported serious adverse events. Larger studies are needed to further assess the  
57  
58 91 safety and efficacy of PLP10.  
59  
60

92  
93 **Trial registration** International Standard Randomized Controlled Trial, number  
94  
95 ISRCTN87818535.

## 96 Introduction

97 Multiple sclerosis (MS) is a complex multifactorial disease that results from interplay  
98 between as yet unidentified environmental factors and susceptibility genes.<sup>1-3</sup> Together, these  
99 factors trigger a cascade of events, involving engagement of the immune system,  
100 inflammatory injury of myelin, axons and glia, functional recovery and structural repair,  
101 gliosis, and neurodegeneration.<sup>4</sup> The bio-mechanisms involved are: immune-mediated  
102 inflammation, oxidative stress and excitotoxicity.<sup>5-9</sup> These mechanisms may all contribute to  
103 oligodendrocyte and neuronal damage and even cell death, hence promoting disease  
104 progression. The increasing prevalence of MS, the limited efficacy and the side effects of the  
105 existing treatments urge the clinical need for the development of new, innovative, more  
106 effective, safe, and preventive treatment strategies.

107  
108 Research has shown that multiple variables dynamically interact and many different complex  
109 interrelated processes are simultaneously orchestrated for MS pathogenesis. The fundamental  
110 distinctiveness of systems medicine (SM) is not just the recognition that different specific  
111 complex factors are important in disease management, but that they need to be incorporated  
112 in some meaningful way to treatment selection and delivery.<sup>10</sup> The primary challenge tackled  
113 by systems scientific approach is the elucidation of how these multiple variables dynamically  
114 interact and how one can apply this understanding to affect the system and achieve a  
115 desirable end.<sup>10</sup> The answer might be the simultaneous interference with all involved  
116 perturbed mechanisms, by using a cocktail of different specific ingredients, potentially able  
117 through synergistic effect to give a long, holistic and effective treatment (Supplementary  
118 Information Methods 1).

119

1  
2  
3 120 The polyunsaturated fatty acids (PUFA) composition of membrane phospholipids plays a  
4  
5 121 direct role in immune and non-immune related inflammation. PUFA and antioxidant  
6  
7 122 deficiencies along with decreased cellular antioxidant defense mechanisms have been  
8  
9 123 reported for MS patients.<sup>11</sup>The cause of these PUFA deficiencies is not entirely clear and may  
10  
11 124 involve metabolic and nutritional alterations.<sup>11</sup>  
12  
13  
14  
15

16 126 Increased or uncontrolled inflammation contributes to several different acute and chronic  
17  
18 127 diseases and it is characterized by the production of inflammatory cytokines, arachidonic acid  
19  
20 128 (AA)-derived eicosanoids (prostaglandins (PGs), thromboxanes (TXs), leukotrienes (LTs),  
21  
22 129 and other oxidized derivatives), other inflammatory agents such as reactive oxygen species  
23  
24 130 (ROS) , nitric oxide (NO), and adhesion molecules (Fig 2).<sup>12</sup> During inflammation glutamate  
25  
26 131 homeostasis is altered by activated immune cells releasing increased quantities of glutamate  
27  
28 132 that can result in over activation of glutamate receptors and in return excitotoxic  
29  
30 133 oligodendroglial death.<sup>7, 13</sup> As such, among others, membrane-related pathology, immune-  
31  
32 134 mediated inflammation, oxidative stress and excitotoxicity provide potentially useful  
33  
34 135 combined targets for intervention in MS.  
35  
36  
37  
38  
39

40  
41 137 *In vitro and in vivo* studies have demonstrated that dietary EPA, DHA, LA, and GLA can be  
42  
43 138 implicated and modulate almost all known complex network of events and pathways  
44  
45 139 repertoire in MS pathophysiology. Brain membrane fatty acid composition can be modified  
46  
47 140 with dietary supplementation, but the process has been showed to be age dependent (it takes  
48  
49 141 much longer in adults versus developing brains) as well as possibly dependent on the  
50  
51 142 quantities of the dietary/supplemented PUFAs.<sup>14</sup> Both human and animal studies proved that  
52  
53 143 diets high in DHA and EPA increase the proportion of these PUFA in the membranes of  
54  
55 144 inflammatory cells and reduce the levels of AA.<sup>12, 15</sup> The anti-inflammatory properties of  
56  
57  
58  
59  
60

1  
2  
3 145 omega-3 include production of PGs and TXs of the 3-series and LTs of the 5-series (Fig 2).<sup>14</sup>  
4  
5 146 <sup>16</sup> Resolvins and protectins are biosynthesized from omega-3 fatty acids via cyclooxygenase-  
6  
7 147 2/lipoxygenase (COX-2/LOX) pathways and they promote control of inflammation in neural  
8  
9 148 tissues (Fig 2).<sup>17-21</sup> T-cell proliferation in acute and chronic inflammation can be reduced by  
10  
11 149 supplementation with either omega-6 or omega-3 PUFA.<sup>22</sup> Furthermore, vitamin E is an  
12  
13 150 important antioxidant that can interrupt the propagation of free radical chain reactions.<sup>23</sup>  
14  
15 151 Vitamin E (alpha-tocopherol, an isoform of vitamin E) efficiently detoxifies hydroxyl,  
16  
17 152 perhydroxyl and superoxide free radicals.<sup>24</sup> However  $\gamma$ -tocopherol (another isoform of  
18  
19 153 vitamin E) seems to be more efficiently implicated in trapping NO radicals.<sup>25</sup> In addition  
20  
21 154 alpha-tocopherol exerts non-antioxidant properties, including modulation of cell signaling  
22  
23 155 and immune function, regulation of transcription, and induction of apoptosis.<sup>26</sup>  
24  
25  
26  
27 156  
28  
29 157 Moreover, omega-3 fatty acids electrophilic derivatives formed by COX-2, in activated  
30  
31 158 macrophages can stimulate the nuclear respiratory factor (Nrf2) inducing the transcription of  
32  
33 159 neuroprotective and antioxidant related genes, and can activate the peroxisome proliferator-  
34  
35 160 activated receptor (PPAR) $\gamma$  for anti-inflammatory response.<sup>27-29</sup> In animal studies, EPA and  
36  
37 161 DHA proved to be endogenous ligands of RXRs, with positive effect on neurogenesis.<sup>30</sup>  
38  
39 162 Additionally, in 2008 Salvati and coworkers reported evidense of accelerated myelination in  
40  
41 163 DHA- and EPA-treated animals.<sup>32</sup> Moreover, DHA and EPA are reported to significantly  
42  
43 164 decrease the levels of metalloproteinases (MMP) -2, -3, -9, and -13 with a significant role in  
44  
45 165 the migration of lymphocytes into the CNS by inducing disruption of the blood brain barrier  
46  
47 166 (BBB), an important step in the formation of MS lesions.<sup>33-39</sup>  
48  
49  
50  
51 167  
52  
53 168 Based on the above, specific PUFA and antioxidant vitamins fulfill the criterion of biologic  
54  
55 169 plausibility and have the potential to diminish MS symptoms severity and activity, even  
56  
57  
58  
59  
60

1  
2  
3 170 promoting recovery (remyelination).<sup>11</sup> Overall, PLP10 contains multiple ingredients (omega-  
4  
5 171 3, omega-6 and other fatty acids and vitamins) potentially able to modulate key  
6  
7 172 interconnected components (i.e. genes, proteins) and structural molecules (i.e. cellular  
8  
9 173 membrane lipids, receptors) within the functional network of events of MS pathogenesis.<sup>40</sup>

10  
11  
12 174

13  
14 175 This is a randomized phase II, single-center, double-blind, placebo-controlled, proof-of-  
15  
16 176 concept clinical trial evaluating the therapeutic ability of PLP10 and of two other  
17  
18 177 interventions (A and C) consisting of PLP10 constituent partial fractions (Table 1) versus  
19  
20 178 placebo on RRMS patients.

21  
22  
23 179

24  
25 180

## 26 27 28 181 **Methods**

### 29 30 182 **Patients**

31  
32 183 Eligibility criteria were an age of 18 to 65; a diagnosis of RRMS according to the McDonald  
33  
34 184 criteria; a score of 0.0 to 5.5 on the EDSS, a rating that ranges from 0 to 10, with higher  
35  
36 185 scores indicating more severe disability; MRI showing lesions consistent with MS; and at  
37  
38 186 least one documented clinical relapse either receiving or not disease modifying treatment  
39  
40 187 (DMT) within the 24 months period before beginning (enrollment) of the study. Patients were  
41  
42 188 excluded because of a recent (<30 days) relapse, prior immunosuppressant or monoclonal  
43  
44 189 antibodies therapy, pregnancy or nursing, other severe disease compromising organ function,  
45  
46 190 progressive MS, history of recent drug or alcohol abuse, use of any additional food  
47  
48 191 supplement, vitamin, or any form of PUFA, history of severe allergic or anaphylactic  
49  
50 192 reactions or known specific nutritional hypersensitivity. No monitor or limitations on  
51  
52 193 patients' daily diet habits were included in the study design since the quantities of the  
53  
54 194 ingredients within the formulas daily-dosage could not be significantly affected or spoiled by

1  
2  
3 195 any confounding factors within any known global daily food diet (see procedures, treatment  
4  
5 196 regimen and end-points).

6  
7 197

8  
9 198 The study was conducted in accordance with the standards of the International Conference of  
10  
11 199 Harmonization Guidelines for Good Clinical Practice. The protocol was developed by the  
12  
13 200 investigators and it was approved by the Cyprus National Bioethics Committee and was  
14  
15 201 overseen by an independent safety-monitoring committee evaluating the safety and over-all  
16  
17 202 benefit-risk profiles. The adherence of care providers with the protocol was assessed by an  
18  
19 203 external committee assigned by the funder of the project through reviews of case report  
20  
21 204 forms. All patients gave written informed consent at the time of enrolment.  
22  
23 205

24  
25 206

### 26 27 206 **Randomization and masking**

28  
29 207 Patients were randomly assigned to four intervention groups in a 1:1:1:1 ratio stratified by  
30  
31 208 gender (women to men, 3:1). Randomization was facilitated by a lottery-type pool of  
32  
33 209 numbered balls. Patients were randomly assigned to treatment in blocks of four by flipping a  
34  
35 210 coin as follows: for the first two drawn balls heads stratified them to the groups A/B and tails  
36  
37 211 stratified them to the groups C/D. The other two balls were stratified accordingly. A second  
38  
39 212 toss of the coin assigned the two patients to group A (head)/B (tail) or group C (head)/D  
40  
41 213 (tail). The randomization scheme was generated, performed and securely stored by Helix  
42  
43 214 Incubator Organization of Nicosia University (HIONU).  
44  
45 215

46  
47 216

48  
49 216 The interventions had identical appearance and smell in dark bottles (15 daily-dose  
50  
51 217 portions/bottle) under nitrogen bed and labeled by HIONU with code numbers, unidentifiable  
52  
53 218 for both patients and investigators. Study data were collected by the investigators and saved  
54  
55 219 by the HIONU that also held the blinded codes of the study. All study personnel involved in  
56  
57  
58  
59  
60



1  
2  
3 220 the conduct of the study were blinded throughout the study. Treating/examining physician,  
4  
5 221 other investigators, pharmacist, neuroradiologist and patients were masked to treatment  
6  
7 222 allocation.  
8

9  
10 223

#### 11 224 **Procedures and end points**

12  
13  
14 225 The specific omega-3 (re-esterified glycerides) and omega-6 (glycerides) raw materials were  
15  
16 226 purchased according to the required interventions' PUFA-fraction specification (molecular  
17  
18 227 structure, quantity/ratio and quality) with vitamin E (alpha-tocopherol) used as antioxidant  
19  
20 228 stabilizer by the supplier. The vitamins and masking aroma were purchased separately. The  
21  
22 229 mixing of fractions to the final required intervention-composition specification was always  
23  
24 230 performed by the same team of scientists under the supervision of the involved medical  
25  
26 231 biochemist and lipidology specialist, under appropriate conditions every six months.  
27  
28 232 Interventions were stored refrigerated in dark until use. See Table 1 and Supplementary  
29  
30 233 Information Methods 1 and 2 for intervention specification detailed description and  
31  
32 234 study/intervention rational.  
33  
34  
35

36 235

37  
38 236 Participants were randomly assigned to receive: in group A, a daily dose of a 19.5ml  
39  
40 237 mixture of EPA (1,650mg) / DHA (4,650mg) / GLA (2,000mg) / LA (3,850mg) / total other  
41  
42 238 omega-3 (600mg) / total MUFA (1,714mg) + total SFA (18:0 160mg, 16:0 650mg) / vitamin  
43  
44 239 A (0.6mg) / vitamin E (22mg) plus citrus-aroma (intervention A); in group B PLP10, a daily  
45  
46 240 dose of a 19.5ml mixture of EPA (1,650mg) / DHA (4,650mg) / GLA (2,000mg) / LA  
47  
48 241 (3,850mg) / total other omega-3 (600mg) / total MUFA (1,714mg) + total SFA (18:0 160mg,  
49  
50 242 16:0 650mg) / vitamin A (0.6mg) / vitamin E (22mg) plus pure  $\gamma$ -tocopherol (760mg) plus  
51  
52 243 citrus-aroma (intervention B); in group C, a daily dose of a 19.5ml mixture of pure  $\gamma$ -  
53  
54 244 tocopherol (760mg) dispersed in pure virgin olive oil (16,137 mg) plus citrus-aroma  
55  
56  
57  
58  
59  
60

1  
2  
3 245 (intervention C) and in group D placebo, a daily dose of a 19.5ml mixture of pure virgin  
4  
5 246 olive oil (16,930mg) plus citrus-aroma (intervention D) (Table 1). The institution's  
6  
7 247 pharmacist was responsible for the appropriate storage and handling of the interventions to  
8  
9 248 the individual participants. The interventions were taken orally once daily 30 minutes before  
10  
11 249 dinner by a dosage calibrated cup for 30 months. The ingredients, ratio and dose have been  
12  
13 250 selected based on their biophysical interrelation to the total known multiple MS causing  
14  
15 251 factors, their biochemical importance and the role expected to play in the normalisation and  
16  
17 252 treatment of the involved complex network of events in the disease pathophysiology.  
18  
19 253 Moreover, the high intake dosage was used to overcome any abnormal dietary accumulation  
20  
21 254 of related agents as a result of patients' food intake habits, irrespective of geographical origin,  
22  
23 255 in relation to the daily consumption ratio of the total fatty acid intake; in order to end-up with  
24  
25 256 omega-3 to omega-6 PUFA indicated physiological body ratio composition of 1:1 wt/wt.  
26  
27  
28  
29  
30 257  
31  
32 258 The period beginning from July 1<sup>st</sup> 2007 (enrolment) until December 31<sup>st</sup> 2007 (entry  
33  
34 259 baseline) was used for normalization period. This six-month normalization period would  
35  
36 260 allow the interventions' agents to exert their beneficial effect (for the  
37  
38 261 incorporation/normalization of cell membranes by oral PUFA, since they need four to six  
39  
40 262 months to exert pivotal action on immune and neural cells, correction of antioxidant  
41  
42 263 deficiency and body PUFA, and optimal normalization of EPA and DHA levels/ratio).<sup>41-43</sup>  
43  
44  
45 264 The study was completed on December 31<sup>st</sup> 2009 and the recording of relapses continued  
46  
47 265 until December 31<sup>st</sup> 2010. More clearly the study included the "normalization period" (July  
48  
49 266 1<sup>st</sup> 2007 to Dec 31<sup>st</sup> 2007), the "on treatment" period (Jan 1<sup>st</sup> 2008 to Dec 31<sup>st</sup> 2009) and the  
50  
51 267 12-month "extended period" (Jan 1<sup>st</sup> 2010– Dec 31<sup>st</sup> 2010).  
52  
53  
54 268  
55  
56  
57  
58  
59  
60

1  
2  
3 269 Depending on their clinical status and in accordance with the ethical issues governing clinical  
4  
5 270 trials participants continued receiving the indicative regular available treatments, according to  
6  
7 271 international guidelines with persistent evaluation of any side-effects and adverse events.  
8

9  
10 272 The study was designed to end 30 months after enrolment and clinical assessments were  
11  
12 273 scheduled at entry baseline, 3, 9, 15, 21 and 24 months on-treatment. Patients were also  
13  
14 274 clinically examined by the treating neurologist within 48 hours after the onset of new or  
15  
16 275 recurrent neurologic symptoms.  
17

18  
19 276

20  
21 277 The primary end point was the ARR at two years. A relapse was defined as new or recurrent  
22  
23 278 neurologic symptoms not associated with fever or infection that lasted for at least 24 hours  
24  
25 279 and accompanied by new neurologic signs. Relapses were treated with methyl-prednisolone  
26  
27 280 at a dose of 1g intravenous per day, for three days followed by prednisone orally at a dose of  
28  
29 281 1mg/kg of weight per day on a tapering scheme for three weeks. The secondary end point at  
30  
31 282 two years was the time to confirmed disability progression, defined as an increase of 1.0 or  
32  
33 283 more on EDSS, confirmed after six months (progression could not be confirmed during a  
34  
35 284 relapse). The final EDSS score was confirmed six months after the end of the study. A post-  
36  
37 285 hoc analysis was performed assessing the proportion of patients free from new or enlarging  
38  
39 286 T2 lesions on brain MRI scans at the end of the study for the per-protocol participants of the  
40  
41 287 group receiving the highest effective intervention versus placebo. Comparison was made only  
42  
43 288 versus the available archival MRI scans up to three months before the enrolment date. MRI  
44  
45 289 scans were performed and blindly analyzed at an MRI evaluation centre. The patients  
46  
47 290 continued to be followed for additional 12 months after completion of the trial and relapses  
48  
49 291 were recorded. Finally, patients were strongly encouraged to remain in the study for follow-  
50  
51 292 up assessments even if they had discontinued the study drug.  
52  
53  
54  
55  
56  
57  
58  
59  
60

293

1  
2  
3 294 Blood samples were collected from all randomized patients at the time of enrolment, at every  
4  
5 295 scheduled clinical assessment and during relapses. To check individual compliance with  
6  
7 296 intake, the fatty acids composition of patients' red blood cells' membranes was determined,  
8  
9  
10 297 by gas chromatography, according to a standard protocol. The fatty acid analyses were  
11  
12 298 performed after study termination and thus did not influence the blinding.

13  
14 299  
15  
16 300 The involved neurologist was experienced with more than 20 years in practice and trained to  
17  
18 301 standardise EDSS scoring procedures, examined patients, made all medical decisions,  
19  
20 302 determined the EDSS score and reviewed adverse or side-effects. The medical biochemist,  
21  
22 303 specialist on lipidology and immunology and the registered clinical dietitian, members of the  
23  
24 304 investigator team were experienced with more than 25 years in practice. Patients were able to  
25  
26 305 contact the neurologist at any time if there was any adverse event, side-effect or allergic  
27  
28 306 reaction. The study drug was not suspected to have any clinical or laboratory adverse effects  
29  
30 307 different from placebo that could disturb the double-blind nature of the trial. Therefore, the  
31  
32 308 same study-neurologist functioned as both the treating and evaluating physician.

33  
34 309  
35  
36 310 Safety measures were assessed from the time of enrollment until 12 months following study  
37  
38 311 completion. Haematological and biochemical tests were performed at enrolment and at every  
39  
40 312 12 months, including full blood count, renal and liver function tests, proteins, cholesterol,  
41  
42 313 triglycerides, glucose and electrolytes.

43  
44 314  
45  
46 315 The whole procedure followed the clinical trial guidelines as required by the USA Food and  
47  
48 316 Drug Administration, European Medicines Agency, and the Committee for Medicinal  
49  
50 317 Products for Human Use.<sup>44</sup>

51  
52 318  
53  
54  
55  
56  
57  
58  
59  
60

1  
2  
3 319 **Statistical analysis**  
4

5 320 Power calculations could not be done before the study because of the lack of information  
6  
7 321 from previous studies on potential effect sizes. In 2005 the prevalence of MS in Cyprus  
8  
9 322 (600,000 population) was 120/100.000. Based on the aforementioned MS patients' numbers  
10  
11 323 of our country and the centre of reference, the CING, we were able to enrol the 20% of the  
12  
13 324 total RRMS patients eligible for treatment in the trial. Sample size was strictly based on this  
14  
15 325 subjects' availability parameter and the novelty of the assessed intervention.  
16  
17  
18  
19

20  
21 327 Baseline characteristics were compared across all intervention groups by ANOVA or  
22  
23 328 Kruskal-Wallis rank test for continuous variables and by mean Fisher's exact test for  
24  
25 329 categorical variables, as appropriate.  
26  
27

28 330  
29  
30 331 For the primary outcome, the ARR was analysed in a pair-wise fashion for the active  
31  
32 332 interventions compared to placebo using negative binomial regression models adjusted for  
33  
34 333 number of relapses within two years before baseline, EDSS score at baseline and DMT. The  
35  
36 334 relapse rate was calculated as the total number of relapses divided by the total number of  
37  
38 335 patient-years followed for each treatment group. ARR differences were also calculated  
39  
40 336 among all comparable parameters and reported as percent difference.  
41  
42

43 337  
44  
45 338 For the secondary end-point outcome, the time to disability progression, Kaplan–Meier  
46  
47 339 curves were constructed. Progression to disability and time thereof was compared in a pair-  
48  
49 340 wise fashion for the active interventions versus placebo by the log-rank test in the main  
50  
51 341 analysis and by Cox proportional-hazards models with adjustment for baseline EDSS score,  
52  
53 342 age and DMT in the supportive analysis. Each test was performed with a significance level of  
54  
55  
56  
57  
58  
59  
60

1  
2  
3 343 0.05. Multivariate models considered all variables with  $P < 0.1$  on univariate models. There  
4  
5 344 was no overt violation of the proportionality assumption.  
6  
7 345

8  
9  
10 346 Both, per-protocol and intention to treat (ITT) analyses were performed, for different sets of  
11  
12 347 research questions to be answered, and both are reported. Missing data of the five lost to  
13  
14 348 follow patients were imputed by use of the last-observation-carried-forward (LOCF)  
15  
16 349 approach. Due to the proof-of-concept design of the study, the considerable non-adherence  
17  
18 350 rate (49%) and the interpretation issues caused thereof regarding the ITT analysis, the per-  
19  
20 351 protocol analysis considered being more informative and appropriate method approach to  
21  
22 352 answer the research addressed questions of efficacy of the interventions when subjects were  
23  
24 353 continuously following the protocol. All statistical analyses were well defined a priori. All  
25  
26 354 analyses were performed with STATA SE 10.0 (College Station, TX, USA). P-values are  
27  
28 355 two-tailed.  
29  
30  
31

32 356

### 33 34 357 **Role of the funding source**

35  
36 358 The funders had no role in study design, data collection and analysis, decision to publish, or  
37  
38 359 preparation of the manuscript. All members of the writing group had full access to all study  
39  
40 360 data and contributed to its interpretation and prepared, reviewed, and approved the  
41  
42 361 manuscript for submission. All authors had final responsibility for the decision to submit the  
43  
44 362 paper for publication.  
45  
46  
47

48 363

### 49 50 364 **Results**

#### 51 52 365 **Study population**

1  
2  
3 366 From July 2007 through December 2010 (including the 12-month extended period), a total of  
4  
5 367 80 MS patients were randomly assigned to a study group at the CING (tertiary neurological  
6  
7 368 center).  
8

9  
10 369

11 370 Among the 80 patients, 20 patients were randomly assigned to each of the three groups to  
12  
13 371 receive the interventions and 20 to receive placebo (Fig 1). Baseline characteristics of both  
14  
15 372 the ITT and the per-protocol populations were similar across groups (Table 2A and 2B). All  
16  
17 373 patients that drop-out completed follow-up until study completion and were included in the  
18  
19 374 ITT analyses (Table 4). Five patients were lost to follow before their first scheduled visit and  
20  
21 375 two other patients that dropped-out before their first scheduled visit progressed to secondary  
22  
23 376 progressive MS. Fifteen patients dropped-out without successfully completing the  
24  
25 377 “normalization” period including five pregnancies. Another 17 patients dropped-out early  
26  
27 378 after entry baseline. Seven patients that dropped out were given monoclonal antibody  
28  
29 379 treatment (natalizumab). Overall, a total of 41 (51%) patients completed the 42-month study  
30  
31 380 (July 2007 through December 31<sup>st</sup> 2010, including the 12-month extended period) where one  
32  
33 381 patient from group A and two from the placebo group transferred on natalizumab, and 39  
34  
35 382 (49%) patients either withdrew (drop-out) or lost to follow. Reasons for study-interventions  
36  
37 383 discontinuation are listed in Figure 2.  
38  
39  
40  
41  
42

43 384

#### 44 385 **Efficacy**

#### 45 386 **Relapses**

46  
47 387 As a proof-of-concept trial we primarily needed to answer whether the interventions were  
48  
49 388 effective for those MS patients who adhere to the assigned treatment, the per-protocol  
50  
51 389 analysis.<sup>45</sup> For the sake of methodological comprehensiveness we also present the ITT  
52  
53 390 analysis as a secondary analysis, to answer a different question, complementary to our core  
54  
55  
56  
57  
58  
59  
60

1  
2  
3 391 hypothesis; like what happened to MS patients who were placed on the interventions (the  
4  
5 392 effect of assignment).<sup>45</sup>  
6  
7 393  
8  
9  
10 394 Regarding the per-protocol analysis, during the first year of treatment, the ARR was 0.80,  
11  
12 395 0.40, 0.78 and 0.83 for the four intervention groups respectively. During the second year, the  
13  
14 396 ARR was 0.90, 0.40, 0.67 and 1.25 for the four intervention groups respectively. Overall, for  
15  
16 397 the two-year primary end point, 8 relapses were recorded for the 10 patients in PLP10 group  
17  
18 398 (0.40 ARR) versus 25 relapses for the 12 patients in placebo (1.04 ARR), a 64% adjusted  
19  
20  
21 399 relative rate reduction (RRR) for the PLP10 group (RRR 0.36, 95% confidence interval (CI)  
22  
23 400 0.15 to 0.87,  $p=0.024$ ) (Tables 3A, 5 and Fig 3A and 3C). Excluding patients on monoclonal  
24  
25 401 antibody (natalizumab) treatment, the observed adjusted RRR became stronger (72%) over  
26  
27 402 the two years (RRR 0.28, 95% CI 0.10 to 0.79,  $p=0.016$ , Tables 3B and 5). Pair-wise  
28  
29 403 comparisons for the other two groups against placebo did not yield statistically significant  
30  
31 404 results (Tables 3A, 3B). The proportion of patients with  $\leq 1$  relapse for the two years on-study  
32  
33 405 was higher in the PLP10 group than in the placebo group (90% versus 42%,  $p=0.030$ , Table  
34  
35 406 5). Seeking to investigate further the observed difference, we compared the relapse rate  
36  
37 407 during the 24 months before entry to the study to the 24 months on-treatment for each  
38  
39 408 intervention group. We observed a statistically significant relative reduction in the ARR  
40  
41 409 (70%) only in the PLP10 group (RRR 0.30; 95% CI 0.14 to 0.65,  $p=0.003$ , Table 3A);  
42  
43 410 within-group comparisons for the three other groups ARR reduction was not significant and  
44  
45 411 remained not significant when natalizumab treated patients were further excluded from the  
46  
47 412 analysis. The effect of PLP10 through time at different time-windows versus placebo for all-  
48  
49 413 time on-study patients is shown in Figures 3A to 3D. The ARR analysis, within time-  
50  
51 414 windows, was not an assigned endpoint, but it could help in the process of evaluating parallel  
52  
53 415 information as the time needed for a specific treatment intervention activity to be evident, as  
54  
55  
56  
57  
58  
59  
60



1  
2  
3 416 well as the efficacy profile through time. PLP10 reached maximum effect within a year on-  
4  
5 417 treatment (counting from the entry baseline) and remained stable at an ARR of 0.4,  
6  
7 418 displaying a steadily reduced ARR with long free-relapse time-windows. These group B  
8  
9 419 characteristics are considered important parameters of a successful MS treatment where the  
10  
11 420 rule than the exception is the heterogeneity among patients' disease evolution. Specifically,  
12  
13 421 Figure 3D demonstrates the dispersion of relapses throughout the 2-year period of all-time  
14  
15 422 on-study (excluding patients on natalizumab) of PLP10 (n=10) versus placebo (n=10).  
16  
17 423 Placebo, in line with the existing knowledge of how relapse history works in relation to future  
18  
19 424 relapses on MS patients (contagion phenomenon) indicates the expected linearly increased  
20  
21 425 trend of the relapse incidence.<sup>46</sup> The same phenomenon was true for the groups A and C.  
22  
23 426 Finally, during the 12 month post-study extended period (January 1<sup>st</sup> 2010 to December 31<sup>st</sup>  
24  
25 427 2010) all-time on-study patients that received PLP10, showed persistent benefit in the ARR  
26  
27 428 compared to placebo (six relapses for the 10 subjects within PLP10, 0.6 ARR versus 19 for  
28  
29 429 the 12 subjects within placebo group, 1.58 ARR) indicating a statistically significant 62%  
30  
31 430 adjusted relative rate reduction in the ARR for the PLP10 group (RRR 0.38, 95% CI 0.12 to  
32  
33 431 0.99, p=0.046).  
34  
35  
36 432  
37  
38 433 Regarding the ITT analysis, within PLP10 group, none of the nine drop-out patients changed  
39  
40 434 to natalizumab and two out of nine discontinued because of pregnancy, whereas two out of  
41  
42 435 seven drop-out patients from the placebo group changed to natalizumab (a total of four  
43  
44 436 patients within the placebo arm population were on natalizumab, including the two patients  
45  
46 437 that transferred while all-time on-study versus none within PLP10 group (Supplementary  
47  
48 438 Information Fig 1). As reported, natalizumab reduces ARR by 68%, decreases the possibility  
49  
50 439 of disability progression by 43% with 57% of patients free of new or enlarging T2 lesions on  
51  
52 440 MRI scans compared to 15% on placebo.<sup>47</sup> The relapses of the drop-out patients are reported  
53  
54  
55  
56  
57  
58  
59  
60

1  
2  
3 441 in Table 4A. As expected no statistically significant differences in the ARR were calculated  
4  
5 442 for the comparison of any group versus placebo for the 24 months on-treatment, with a 0.75  
6  
7 443 ARR within PLP10 (30 relapses) and 1.03 ARR within placebo (41 relapses) group, a 27%  
8  
9 444 ARR reduction (Table 4B). Interestingly, despite the high non-adherence rate, there was a  
10  
11 445 statistically significant difference for the comparison of the ARR in the 24 months before  
12  
13 446 entry baseline to the 24 months on-treatment for the PLP10 group (RRR 0.45, 95% CI 0.26 to  
14  
15 447 0.78,  $p=0.005$ ).  
16  
17  
18  
19

### 20 21 449 **Disability progression**

22  
23 450 Regarding the per-protocol analysis, at two years, the time to disability progression, with  
24  
25 451 confirmation after six months (secondary end-point) was significantly longer only with  
26  
27 452 PLP10. The cumulative probability of disability progression was 10% in the PLP10 group  
28  
29 453 and 58% in the placebo group ( $p=0.019$ ) (Supplementary Information Fig 2). After excluding  
30  
31 454 patients on natalizumab, there was an increased statistically significant difference between  
32  
33 455 the PLP10 and the placebo group for the same analysis ( $p=0.006$ ) (Fig 4A). At two years, the  
34  
35 456 cumulative probability of progression was 10% in the PLP10 group and 70% in the placebo  
36  
37 457 group, which represents a decrease of 60 percentage points or a relative 86% decrease in the  
38  
39 458 risk of sustained progression of disability within PLP10 group (adjusted hazard ratio, 0.11;  
40  
41 459 95% CI 0.01 to 0.97,  $p=0.047$ ). One versus seven out of ten patients progressed to confirmed  
42  
43 460 disability in the PLP10 and the placebo groups respectively when patients on natalizumab  
44  
45 461 were excluded. No statistically significant difference was observed for any comparison of the  
46  
47 462 other two groups compared to placebo (Fig 4A and Supplementary Information Fig 2).  
48  
49  
50  
51  
52 463  
53  
54 464 Regarding the ITT analysis, at two years, the cumulative probability of progression was 10%  
55  
56 465 in the PLP10 group and 35% in the placebo group ( $p=0.052$ , a trend for an effect), which  
57  
58  
59  
60

1  
2  
3 466 represents a decrease of 25 percentage points or a relative 71% decrease of the PLP10 for the  
4  
5 467 risk of sustained progression of disability (adjusted hazard ratio 0.22, 95% CI 0.04 to 1.07,  
6  
7 468  $p=0.06$ ) (Fig 4B). Two versus seven out of the total randomized patients progressed to  
8  
9 469 confirmed disability in the PLP10 and the placebo groups respectively. No significant  
10  
11 470 differences were observed for groups A or C against placebo (Fig 4B). The mean change in  
12  
13 471 Expanded Disability Status Scale (EDSS) score as a function of visit number is shown in  
14  
15 472 Figure 5.  
16  
17  
18  
19  
20

## 21 474 **MRI**

22  
23 475 Over two years, the MRI results support the overall conclusion from the study that PLP10 has  
24  
25 476 a positive effect on disease activity since only 29% from the PLP10 group as opposed to 67%  
26  
27 477 from the placebo group developed new or enlarging T2 lesions (57% relative risk reduction).  
28  
29 478 Excluding patients on natalizumab there is an increased relative risk reduction (64%) between  
30  
31 479 PLP10 as opposed to placebo with 29% of patients on PLP10 and 80% on placebo with  
32  
33 480 development of new or enlarging T2 lesions (Table 5).  
34  
35

36 481

## 38 482 **Safety**

39  
40 483 Over the course of the 30 month study no significant adverse events were reported from any  
41  
42 484 group. According to a questioner procedure the only aetiology for drop-outs was the  
43  
44 485 palatability and smell of the formula preparations. Nausea was reported by two patients. No  
45  
46 486 abnormal values observed on any of the biochemical and haematological blood tests. No  
47  
48 487 allergic reactions reported.  
49

50 488

## 54 489 **Discussion**

1  
2  
3 490 In this proof-of-concept clinical trial assessing the safety and efficacy of three cocktail  
4  
5 491 intervention formulas in RRMS, we observed a significant benefit for the novel PLP10  
6  
7 492 intervention compared to placebo for both the ARR and the progression to disability. Our  
8  
9 493 results include analyses pertaining to a total of 42 months study collected data, including the  
10  
11 494 12-month, free of intervention treatment, extension period. We focused on the per-protocol  
12  
13 495 data analysis since it is the appropriate method to best provide the answer to the proof-of-  
14  
15 496 concept trial-addressed question. The high drop-out rate was mostly the result of formulas  
16  
17 497 palatability, a common phenomenon in trials using oily interventions where a lot of patients  
18  
19 498 tend to drop-out soon after first dosage. We thus present our main per-protocol analysis, as  
20  
21 499 well as a subgroup analysis excluding patients on natalizumab. We have found a statistically  
22  
23 500 significant reduction in the ARR and the disability progression comparing not only patients  
24  
25 501 on PLP10 versus placebo but also comparing the ARR of the PLP10 patients in the 24-month  
26  
27 502 period prior to the study to the ARR of the 24 months on-study; the observed differences  
28  
29 503 became larger when patients that received natalizumab (the most potent disease modifier)  
30  
31 504 were excluded. The ARR decreased within a year on PLP10 and significantly remained stable  
32  
33 505 until study completion. Statistically significant difference of ARR between patients on PLP10  
34  
35 506 versus placebo continued for the additional 12 month extended period (persistent effect)  
36  
37 507 without significant difference on DMT. These clinical findings are supported by the results  
38  
39 508 regarding the MRI analysis where the proportion of patients free from new or enlarging brain  
40  
41 509 T2 lesions was also higher in PLP10 group versus placebo. The persistent effect within the  
42  
43 510 extended period it is considered of major importance and supportive of the results since it is  
44  
45 511 in agreement with the very long washouts, reported necessary, for omega-3 fatty acids and  
46  
47 512 especially DHA to return towards pretreatment values within the fatty acids of plasma,  
48  
49 513 platelets, monocytes and red blood cells.<sup>42</sup> This study also provides important 30-month,  
50  
51  
52  
53  
54  
55  
56  
57  
58  
59  
60

1  
2  
3 514 placebo-controlled information about the safety of PLP10, A and C interventions. No severe  
4  
5 515 side effects have been reported.  
6

7 516

8  
9  
10 517 As medications used to treat MS become increasingly highly specific and potent, attention to  
11  
12 518 safety is paramount. Current available treatments are products of reductionism, partially  
13  
14 519 effective, associated with severe side effects without (re)myelinating or neuroprotective  
15  
16 520 abilities. Interferons and glatiramer acetate, the most widely used first-line MS drugs  
17  
18 521 available today, are associated with the least severe side-effects among MS therapies but they  
19  
20 522 are reported with only 29-33% ARR reduction and with no significant effects on the  
21  
22 523 progression of disability. Natalizumab as previously discussed and Fingolimod with 54%  
23  
24 524 ARR reduction (without significant benefit on the progression of disability) are second-line  
25  
26 525 drugs associated with severe side-effects.<sup>47, 48</sup>  
27  
28

29 526

30  
31  
32 527 No existing MS treatment has ever been designed as a result of SM concept approach or with  
33  
34 528 a potential to effectively stimulate intrinsic remyelinating and neuroprotecting mechanisms or  
35  
36 529 exert such an action. Now we propose that a holistic SM model approach has to be applied by  
37  
38 530 synchronized action on all involved perturbed mechanisms. PLP10 has innovative  
39  
40 531 characteristics with a postulated efficacy attained through different mechanisms of action and  
41  
42 532 probably by the synergistic effect of its constituent ingredients. PLP10 has all the  
43  
44 533 characteristics of a medical food with the action to feed a normal metabolic process by  
45  
46 534 supplying nutritional structural membrane precursors, building blocks, and vitamins from  
47  
48 535 dietary sources that enhance remyelination and neuroprotection and simultaneously promote  
49  
50 536 normalization of all cellular membranes lipid content. The intention is to normalize the  
51  
52 537 specific nutritional requirements of the MS patients.  
53  
54

55 538  
56  
57  
58  
59  
60

1  
2  
3 539 Different factors and molecular entities appear to be part of the possible aetiology for MS  
4  
5 540 with specific PUFA and antioxidants found to be key substances related to all known  
6  
7 541 pathogenic and recovery mechanisms. But, it is well established that MS patients are  
8  
9 542 characterized with significant deficiencies in antioxidant efficiency as well as in PUFA levels  
10  
11 543 in blood and cellular membranes.<sup>11, 49-51</sup>  
12  
13

14 544  
15  
16 545 According to one hypothesis, the change in the ratio of omega-3 to omega-6, due to  
17  
18 546 increasing consumption of omega-6 PUFA, meaning high accumulation of AA, in the  
19  
20 547 Western diet, may be one of the major factors responsible for the increasing incidence of  
21  
22 548 inflammatory diseases relative to populations. In the Western diet, the ratio of omega-3 to  
23  
24 549 omega-6 is about 1:20–30; in populations that consume fish-based diets, the ratio is about  
25  
26 550 1:1–2.<sup>52, 53</sup> The intervention daily dose was aiming and believed to be high enough to  
27  
28 551 restore/amplify body efficient antioxidant activity and ensure cellular membranes lipid profile  
29  
30 552 normalization (PUFA content) and simultaneously potentiate involvement of the ingredients  
31  
32 553 in the anti-inflammatory and recovery mechanisms. Diet fatty acid molecules need about six  
33  
34 554 months period to exert their beneficial effect and this essential parameter was for the first  
35  
36 555 time under consideration in our study design (normalization period).<sup>42</sup> This chronotherapy  
37  
38 556 parameter it is of major importance in line with the SM treatment philosophy and if it is not  
39  
40 557 included in the trial design the possibility of misleading result evaluation greatly increases. In  
41  
42 558 fact, considering that omega-3 supplementation can release and replace excess AA within the  
43  
44 559 cellular membranes, we can speculate that an increased inflammatory activity can possibly  
45  
46 560 result during the first six months of supplementation (during normalization period).  
47  
48  
49  
50  
51

52 561  
53  
54 562 The maintenance of myelin requires continued turnover of its components throughout life.<sup>54,55</sup>  
55  
56 563 In addition to the EPA, DHA, LA, and GLA, PLP10 was containing limited quantities of  
57  
58  
59  
60

1  
2  
3 564 other structural PUFA, specific MUFA (mostly oleic acid) and SFA (palmitic and stearic  
4  
5 565 acid), specifically to provide a direct source for neuronal cell membranes rehabilitation and  
6  
7 566 for (re)myelination and neuroprotection since they are all major components, precursors and  
8  
9  
10 567 building blocks of any new physiological myelin and cellular membranes in general.  
11  
12 568 Assembly of the correct molecules into myelin membrane may be especially critical during  
13  
14 569 active synthesis. Possibly, if critical constituents aren't available or are metabolically  
15  
16 570 blocked, amyelination, dysmyelination or demyelination may ensue.<sup>56</sup>  
17  
18  
19 571

20  
21 572 The well known and established safety of the ingredients used and the protocol guidelines  
22  
23 573 were supportive reasons for us to proceed with the clinical study even though with limitation  
24  
25 574 on the pre-estimation of required trial sample size as it was discussed in method section. The  
26  
27 575 adherence of the subjects is another issue but the duration of the study (42 months) is adding  
28  
29 576 power to the results;<sup>44</sup> having the research questions been consciously and carefully  
30  
31 577 approached and answered. Furthermore, the statistical methodologies used along with the  
32  
33 578 appropriate adjustments, broadly accepted for MS clinical trials, power the findings, results,  
34  
35 579 and significance. The baseline characteristics of the treatment arms could possibly be  
36  
37 580 considered indicative of four very active groups of patients but that was the result of the  
38  
39 581 limited number of RRMS population eligible for the study within Cyprus. On the other hand  
40  
41 582 the balanced baseline characteristics without statistical differences, the statistical adjustments  
42  
43 583 (for all important baseline parameters i.e. relapses, EDSS, age and DMT) and the  
44  
45 584 randomization within four different groups are the safety valves against data  
46  
47 585 misinterpretation. Yet, in small randomized control trials with a high drop-out rate, the per-  
48  
49 586 protocol analysis could be affected by the characteristics of the patients dropping out. In  
50  
51 587 order to safeguard our findings in the best possible way under the circumstances, we  
52  
53 588 proceeded to adjusting for confounders. Moreover, we cannot discard our finding as a false  
54  
55  
56  
57  
58  
59  
60

1  
2  
3 589 positive, given that this is a randomized, double-blind, placebo-controlled clinical trial and,  
4  
5 590 despite its small sample size, represents a piece of evidence that only a larger randomized  
6  
7 591 controlled trial can replicate or refute. It is possible to question why DMTs efficacy cannot  
8  
9 592 be emerged out of the data analysis, of the four treatment arms, and in accordance to their  
10  
11 593 published values. We believe that the limited efficacy of the DMTs, the sample size and the  
12  
13 594 statistical adjustments were strong limiting determining factors for such an indication to be  
14  
15 595 countable. An additional argument is that the efficacy reported for the analysis of pre-  
16  
17 596 treatment (24 months before entry baseline) versus on-trial ARR could be considered as  
18  
19 597 potentially biased due to differences of how relapses were defined during the course of a  
20  
21 598 study compared to pre-treatment period; or due to regression to the mean or placebo effect.  
22  
23 599 This analysis was performed as an additional exploratory analysis that we were able to do due  
24  
25 600 to the availability of data. The relapses of the two pre-treatment years were drawn out of the  
26  
27 601 patients' archival records by the same treating neurologist involved in the study (MP), and  
28  
29 602 according to the patients' hospitalization date for receiving intravenous methyl-prednisolone.  
30  
31 603 This analysis was not used as a primary or a secondary end-point under investigation  
32  
33 604 although it is usually reported by many clinical studies. As a matter of fact many early phase  
34  
35 605 trials are based only on such an analysis (before versus after treatment results). In almost all  
36  
37 606 MS trials the number of relapses within the two years before baseline is a factor under  
38  
39 607 adjustment for the statistical analyses.<sup>48</sup> The inclusion of the post-hoc MRI analysis is another  
40  
41 608 limiting factor that needs attention since it was used as an additional aside exploratory  
42  
43 609 approach (due to study budget limitations it was not possible to be used as a formal  
44  
45 610 endpoint); but the MRI evaluation was blinded and can be considered as representative of the  
46  
47 611 randomized subjects within the treatment arms. As far as the regression to the mean and the  
48  
49 612 placebo effect concerns we believe that the 6-month normalization period is an accountable  
50  
51 613 and valuable eliminating factor of the possible effect; as well as the presence of four groups,  
52  
53  
54  
55  
56  
57  
58  
59  
60



1  
2  
3 614 where only the PLP10 treatment arm is associated with statistically significant efficacy versus  
4  
5 615 placebo.

6  
7 616

8  
9 617 Our observations are consistent with the idea that simultaneous availability of specific PUFA  
10  
11 618 along with other major membrane and myelin building blocks in combination with specific  
12  
13 619 antioxidants, within optimum quantity, quality, ratio and structural form can possibly result to  
14  
15 620 a more appropriate holistic therapy reducing MS disease activity. This is probably succeeded  
16  
17 621 through synergistic and/or simultaneous effect on the interactions and dynamics of the most  
18  
19 622 probable environmental and biological disease causing factors that induce complex biological  
20  
21 623 network of events for disease pathogenesis and evolution; as well as on the protective and  
22  
23 624 reparative mechanisms. We can additionally speculate that the nature of the intervention  
24  
25 625 formula cannot be prohibitive for its use as preventive regimen and does not preclude  
26  
27 626 probable positive efficacy on the other types of MS, but has to be further investigated. A  
28  
29 627 larger size multicenter clinical trial will better establish PLP10 place in the armamentarium of  
30  
31 628 treatments for MS.

32  
33  
34 629

35  
36  
37 630 It is commonly accepted that nutrition is one of the possible environmental factors involved  
38  
39 631 in the pathogenesis of MS, but its role as complementary MS treatment is unclear and largely  
40  
41 632 disregarded.<sup>57</sup> It is well known that the majority of the patients suffering from MS they do  
42  
43 633 use dietary supplements for a variable length of time and they prefer supplement type of  
44  
45 634 “help” over conventional drugs.<sup>58</sup> Dietary antioxidants and fatty acids may influence the  
46  
47 635 disease process in MS by reducing immune-mediated inflammation, oxidative stress and  
48  
49 636 excitotoxic damage.<sup>11</sup> Present data reveal that healthy dietary molecules have a pleiotropic  
50  
51 637 role and are able to change cell metabolism from anabolism to catabolism and down-regulate  
52  
53 638 inflammation by interacting with enzymes, nuclear receptors and transcriptional factors.<sup>57</sup>

1  
2  
3 639 The present preliminary small size randomized controlled phase II clinical trial, for the first  
4  
5 640 time provides link evidence between dietary, metabolic, immunological, and neurobiological  
6  
7 641 aspects of MS after three quarters of a century of unsuccessful scientific efforts. This link  
8  
9 642 evidence might probably be the beginning of opening new horizons and new avenues in the  
10  
11 643 approach of MS prevention and treatment, and possibly of other multifactorial chronic  
12  
13 644 diseases, including neurodegenerative and autoimmune as well.  
14  
15  
16  
17  
18  
19  
20  
21  
22  
23  
24  
25  
26  
27  
28  
29  
30  
31  
32  
33  
34  
35  
36  
37  
38  
39  
40  
41  
42  
43  
44  
45  
46  
47  
48  
49  
50  
51  
52  
53  
54  
55  
56  
57  
58  
59  
60

1.  
Treatment Arms

| A†                                                                                                                                                                                                                                         | B (PLP10)†                                                                                                                                                                                                                                                                     | C†                                                                                                                                             | Placebo†                                                          |
|--------------------------------------------------------------------------------------------------------------------------------------------------------------------------------------------------------------------------------------------|--------------------------------------------------------------------------------------------------------------------------------------------------------------------------------------------------------------------------------------------------------------------------------|------------------------------------------------------------------------------------------------------------------------------------------------|-------------------------------------------------------------------|
| <b>Intervention:</b><br>EPA (1,650mg) / DHA (4,650mg) / GLA (2,000mg) / LA (3,850mg) / total other omega-3 (600mg)* / total MUFA** (1,714mg) + total SFA (18:0 160mg, 16:0 650mg) / vitamin A (0.6mg) / vitamin E (22mg) plus citrus aroma | <b>Intervention:</b><br>EPA (1,650mg) / DHA (4,650mg) / GLA (2,000mg) / LA (3,850mg) / total other omega-3 (600mg)* / total MUFA** (1,714mg) + total SFA (18:0 160mg, 16:0 650mg) / vitamin A (0.6mg) / vitamin E (22mg) + pure $\gamma$ -tocopherol (760mg) plus citrus aroma | <b>Intervention:</b><br>pure $\gamma$ -tocopherol (760mg) dispersed in pure virgin olive oil (16,137 mg) as delivery vehicle plus citrus aroma | <b>Intervention:</b><br>Olive oil (pure virgin) plus citrus aroma |

\* Other omega-3: C18:3n-3 37mg, C18:4n-3 73mg, C20:4n-3 98mg, C22:5n-3 392mg  
 \*\* MUFA: 18:1 1300mg, 20:1 250mg, 22:1 82mg, 24:1 82mg  
 † Total daily dose 19.5ml

EPAX1050, EPAX AS, Aalesund, Norway; was used as the source for the omega-3 PUFA, as re-esterified glycerides from fish body oils; Borage seed oil (organic, cold pressed) “Borago officinalis” Goerlich Pharma International GmbH, Edling, Germany, was used as the source for the omega-6 PUFA, MUFA and SFA, as triglycerides. The pure  $\gamma$ -tocopherol was purchased from Tama Biochemical Co. Ltd., Shinjuku-ku Tokyo, Japan; vitamin A as beta-carotene from HealthAid Ltd., Middlesex, United Kingdom and the Citrus aroma from Givaudan Schwaiz AG, Dubendorf, Switzerland.

**Table 1.** Intervention ingredients per treatment arm.

664  
665  
666  
667  
668  
669  
670  
671  
672  
673  
674

| <b>2A.</b>                                 |                   |                    |                   |                   |              |
|--------------------------------------------|-------------------|--------------------|-------------------|-------------------|--------------|
| Characteristics                            | Group A<br>(n=20) | Group B†<br>(n=20) | Group C<br>(n=20) | Placebo<br>(n=20) | P-<br>value  |
| <b>Sex</b>                                 |                   |                    |                   |                   |              |
| Female - no. (%)                           | 15 (75)           | 15 (75)            | 15 (75)           | 15 (75)           | <b>1.000</b> |
| <b>Age (yr)</b>                            |                   |                    |                   |                   |              |
| Mean ± Standard Deviation (SD)             | <b>38.0±11.9</b>  | <b>36.9±8.4</b>    | <b>37.7±8.7</b>   | <b>38.1±10.9</b>  | <b>0.982</b> |
| Median (Range)                             | 38.0 (22–65)      | 37.0 (25–61)       | 36.5 (24–54)      | 36.0 (21–58)      |              |
| <b>Treatment history</b>                   |                   |                    |                   |                   |              |
| Patients on DMT- no. (%)                   | 11 (55)           | 9 (45)             | 12 (60)           | 10 (50)           | <b>0.875</b> |
| <b>Pre-treatment disease duration (yr)</b> |                   |                    |                   |                   |              |
| Mean ± SD                                  | <b>9.0±7.6</b>    | <b>8.6±4.8</b>     | <b>8.6±5.3</b>    | <b>7.7±5.7</b>    | <b>0.909</b> |
| Median (Range)                             | 7.5 (2–37)        | 8.0 (2–20)         | 8.0 (3–24)        | 6.5 (2–25)        |              |
| <b>Pre-treatment relapses‡</b>             |                   |                    |                   |                   |              |
| Mean ± SD                                  | <b>2.33±1.68</b>  | <b>2.41±1.73</b>   | <b>2.31±1.66</b>  | <b>2.10±1.32</b>  | <b>0.946</b> |
| Median (Range)                             | 2.0 (1–6)         | 2.0 (1–7)          | 2.0 (1–6)         | 2.0 (1–4)         |              |
| ARR                                        | <b>1.17</b>       | <b>1.21</b>        | <b>1.16</b>       | <b>1.05</b>       | <b>0.946</b> |
| Patients -% with ≤1 relapse                | 40                | 45                 | 40                | 35                |              |
| <b>Baseline EDSS score‡</b>                |                   |                    |                   |                   |              |
| Mean ± SD                                  | <b>2.52±1.23</b>  | <b>2.15±1.05</b>   | <b>2.42±1.21</b>  | <b>2.39± 0.93</b> | <b>0.775</b> |
| Median (Range)                             | 2.5 (1.0–5.5)     | 2.0 (1.0–4.0)      | 2.5 (0.0–5.0)     | 2.5 (1.0–4.0)     |              |
| <b>2B.</b>                                 |                   |                    |                   |                   |              |
| Characteristics                            | Group A<br>(n=10) | Group B†<br>(n=10) | Group C<br>(n=9)  | Placebo<br>(n=12) | P-<br>value  |
| <b>Sex</b>                                 |                   |                    |                   |                   |              |
| Female - no. (%)                           | 5 (50)            | 7 (70)             | 6 (66.6)          | 10 (83.3)         | <b>0.419</b> |
| <b>Age (yr)</b>                            |                   |                    |                   |                   |              |
| Mean ± SD                                  | <b>36.6±13.5</b>  | <b>34.80±5.4</b>   | <b>40.9±8.1</b>   | <b>39.8±13.2</b>  | <b>0.572</b> |
| Median (Range)                             | 34.5 (22–65)      | 34.5 (26–43)       | 40.0 (29–54)      | 37.5 (21–58)      |              |
| <b>Treatment history</b>                   |                   |                    |                   |                   |              |
| Patients on DMT- no. (%)                   | 6 (60)            | 4 (40)             | 6 (67)            | 6 (50)            | <b>0.949</b> |
| <b>Pre-treatment disease duration (yr)</b> |                   |                    |                   |                   |              |
| Mean ± SD                                  | <b>9.7±10.0</b>   | <b>8.3±5.3</b>     | <b>11.3±6.1</b>   | <b>8.7± 7.1</b>   | <b>0.807</b> |
| Median (Range)                             | 7.5 (2–37)        | 8.0 (2–20)         | 8.0 (4–24)        | 5.5 (2–25)        |              |
| <b>Pre-treatment relapses</b>              |                   |                    |                   |                   |              |

|                             |               |               |               |               |       |
|-----------------------------|---------------|---------------|---------------|---------------|-------|
| Mean ± SD                   | 2.20±1.47     | 2.70±1.25     | 1.78±0.66     | 1.67±1.37     | 0.241 |
| Median (Range)              | 2.0 (1 – 6)   | 2.5 (1 – 4)   | 2.0 (1 – 3)   | 1.5 (1 – 4)   |       |
| ARR                         | 1.10          | 1.35          | 0.89          | 0.83          |       |
| Patients -% with ≤1 relapse | 30            | 20            | 33            | 50            |       |
| <b>Baseline EDSS score</b>  |               |               |               |               |       |
| Mean ± SD                   | 2.65±1.37     | 2.40±1.12     | 2.11±1.02     | 2.16±0.96     | 0.698 |
| Median (Range)              | 3.0 (1.0–5.5) | 2.5 (1.0–4.0) | 2.0 (1.0–4.0) | 2.0 (1.0–3.5) |       |

† PLP10 group

‡ Available data at Entry Baseline (n=18 for group A, n=17 for group B, n=19 for group C, n=19 for group D)

**Table 2.** The table section 2A reports the demographics and baseline disease characteristics for total randomized population by treatment arm.

The table section 2B reports the demographics and baseline disease characteristics of all-time on-study population by treatment arm. There were no significant between study-group differences at baseline for any characteristic.

675

676

677

678

679

680

681

682

683

684

685

686

687

688

1  
2  
3  
4  
5  
6  
7  
8  
9  
10  
11  
12  
13  
14  
15  
16  
17  
18  
19  
20  
21  
22  
23  
24  
25  
26  
27  
28  
29  
30  
31  
32  
33  
34  
35  
36  
37  
38  
39  
40  
41  
42  
43  
44  
45  
46  
47  
48  
49  
50  
51  
52  
53  
54  
55  
56  
57  
58  
59  
60

| <b>3A.</b>                                                                                                                                                                                                    |                   |             |                    |             |                  |             |                   |             |
|---------------------------------------------------------------------------------------------------------------------------------------------------------------------------------------------------------------|-------------------|-------------|--------------------|-------------|------------------|-------------|-------------------|-------------|
| Characteristics                                                                                                                                                                                               | Group A<br>(N=10) |             | Group B†<br>(N=10) |             | Group C<br>(N=9) |             | Placebo<br>(N=12) |             |
| End Point                                                                                                                                                                                                     | X                 | Y           | X                  | Y           | X                | Y           | X                 | Y           |
| Total No. of relapses                                                                                                                                                                                         | 22                | 17          | 27                 | 8           | 16               | 13          | 20                | 25          |
| <b>Annual Relapse Rate (ARR)</b>                                                                                                                                                                              | <b>1.10</b>       | <b>0.85</b> | <b>1.35</b>        | <b>0.40</b> | <b>0.88</b>      | <b>0.72</b> | <b>0.83</b>       | <b>1.04</b> |
| <b>% Reduction Compared to Placebo (primary endpoint) (Ys)¶</b>                                                                                                                                               | <b>-18</b>        |             | <b>-62</b>         |             | <b>-30</b>       |             | <b>N/A</b>        |             |
| <b>P Value against placebo</b>                                                                                                                                                                                | <b>0.468</b>      |             | <b>0.024</b>       |             | <b>0.578</b>     |             |                   |             |
| <b>ARR change -% (Y to X)¶</b>                                                                                                                                                                                | <b>-23</b>        |             | <b>-70</b>         |             | <b>-18</b>       |             | <b>+25</b>        |             |
| <b>P value against baseline</b>                                                                                                                                                                               | <b>0.425</b>      |             | <b>0.003</b>       |             | <b>0.578</b>     |             | <b>0.500</b>      |             |
| X: Total number of relapses of 24 months pre-treatment (baseline)<br>Y: Total number of relapses of 24 months on-treatment<br>¶ Unadjusted estimate                                                           |                   |             |                    |             |                  |             |                   |             |
| <b>3B.</b>                                                                                                                                                                                                    |                   |             |                    |             |                  |             |                   |             |
| <b>Excluding patients on natalizumab</b>                                                                                                                                                                      | Group A<br>(N=9)  |             | Group B†<br>(N=10) |             | Group C<br>(N=9) |             | Placebo<br>(N=10) |             |
| End Point                                                                                                                                                                                                     | X                 | Y           | X                  | Y           | X                | Y           | X                 | Y           |
| Total No. of relapses                                                                                                                                                                                         | 16                | 15          | 27                 | 8           | 16               | 13          | 13                | 19          |
| <b>Annual Relapse Rate (ARR)</b>                                                                                                                                                                              | <b>0.88</b>       | <b>0.83</b> | <b>1.35</b>        | <b>0.40</b> | <b>0.88</b>      | <b>0.72</b> | <b>0.65</b>       | <b>0.95</b> |
| <b>% Reduction Compared to Placebo (primary endpoint) (Ys)¶</b>                                                                                                                                               | <b>-13</b>        |             | <b>-58</b>         |             | <b>-24</b>       |             | <b>N/A</b>        |             |
| <b>P Value against placebo</b>                                                                                                                                                                                | <b>0.493</b>      |             | <b>0.016</b>       |             | <b>0.412</b>     |             |                   |             |
| <b>ARR change -% (Y to X)¶</b>                                                                                                                                                                                | <b>-6</b>         |             | <b>-70</b>         |             | <b>-18</b>       |             | <b>+46</b>        |             |
| <b>P value against baseline</b>                                                                                                                                                                               | <b>0.857</b>      |             | <b>0.003</b>       |             | <b>0.578</b>     |             | <b>0.354</b>      |             |
| X: Total number of relapses of 24 months pre-treatment (baseline)<br>Y: Total number of relapses of 24 months on-treatment<br>† PLP10 group<br>¶ Unadjusted estimate                                          |                   |             |                    |             |                  |             |                   |             |
| <b>Table 3.</b> The table section 3A reports the two year primary end points of ARR of all-time on-study population by treatment arm and percent difference with placebo. During the 24mo period on-treatment |                   |             |                    |             |                  |             |                   |             |

1  
2  
3 the ARR of the group A was 0.85 with 18% decrease compared to placebo (p=0.468), of PLP10 group  
4 0.40 with 62% decrease (p=0.024), and of group C 0.72 with 30% decrease (p=0.578) and reports the  
5 comparison of the 24mo pre-treatment ARR (baseline ARR) to 24mo on-treatment ARR of all-time on-  
6 study population including patients on natalizumab.  
7  
8  
9  
10

11  
12  
13  
14 The table section 3B reports comparison of the 24mo pre-treatment ARR to 24mo on-treatment ARR of  
15 all-time on-study population excluding patients on natalizumab; and the comparison of the ARR during  
16 the 24mo period on-treatment (primary end point) between each one of the groups against placebo.  
17  
18  
19  
20

21 689

22 690

23 691

24 692

25 693

26 694

27 695

28 696

29 697

30 698

31 699

32 700

33 701

34 702

35 703

36 704

37 705

38 706

39

40

41

42

| <b>4A.</b>                                                                                                                                                           |                   |             |                    |             |                   |             |                   |             |  |
|----------------------------------------------------------------------------------------------------------------------------------------------------------------------|-------------------|-------------|--------------------|-------------|-------------------|-------------|-------------------|-------------|--|
| Characteristics                                                                                                                                                      | Group A<br>(N=8)  |             | Group B†<br>(N=7)  |             | Group C<br>(N=10) |             | Placebo<br>(N=7)  |             |  |
|                                                                                                                                                                      | X                 | Y           | X                  | Y           | X                 | Y           | X                 | Y           |  |
| No. of Relapses                                                                                                                                                      | 20                | 14          | 14                 | 14          | 27                | 26          | 20                | 13          |  |
| <b>Annual Relapse Rate (ARR)</b>                                                                                                                                     | <b>1.25</b>       | <b>0.88</b> | <b>1.00</b>        | <b>1.00</b> | <b>1.35</b>       | <b>1.30</b> | <b>1.42</b>       | <b>0.92</b> |  |
| X: Total number of relapses of 24 months pre-treatment<br>Y: Total number of relapses of 24 months on-treatment                                                      |                   |             |                    |             |                   |             |                   |             |  |
| <b>4B.</b>                                                                                                                                                           |                   |             |                    |             |                   |             |                   |             |  |
| Characteristics                                                                                                                                                      | Group A<br>(N=20) |             | Group B†<br>(N=20) |             | Group C<br>(N=20) |             | Placebo<br>(N=20) |             |  |
| End Point                                                                                                                                                            | X                 | Y           | X                  | Y           | X                 | Y           | X                 | Y           |  |
| No. of Relapses                                                                                                                                                      | 45                | 34          | 49                 | 30          | 46                | 41          | 43                | 41          |  |
| <b>Annual Relapse Rate (ARR)</b>                                                                                                                                     | <b>1.13</b>       | <b>0.85</b> | <b>1.23</b>        | <b>0.75</b> | <b>1.15</b>       | <b>1.03</b> | <b>1.08</b>       | <b>1.03</b> |  |
| ARR Reduction -% (Y to X)¶                                                                                                                                           | -25               |             | -39                |             | -10               |             | -5                |             |  |
| <b>P value against baseline</b>                                                                                                                                      | <b>0.120</b>      |             | <b>0.005</b>       |             | <b>0.475</b>      |             | <b>0.652</b>      |             |  |
| <b>% Reduction of the ARR Compared to Placebo (Ys)¶</b>                                                                                                              | <b>-18</b>        |             | <b>-27</b>         |             | <b>0.0</b>        |             | <b>N/A</b>        |             |  |
| <b>P Value against placebo</b>                                                                                                                                       | <b>0.447</b>      |             | <b>0.121</b>       |             | <b>0.996</b>      |             |                   |             |  |
| X: Total number of relapses of 24 months pre-treatment (baseline)<br>Y: Total number of relapses of 24 months on-treatment<br>¶ Unadjusted estimate<br>† PLP10 group |                   |             |                    |             |                   |             |                   |             |  |

**Table 4.** The table section 4A reports the two year primary end point of relapses based on study design as reported by drop-out patients by Treatment Arm. The most drop-out patients that went on disease modified therapy (DMT) were from the group A and placebo with three and two patients respectively on natalizumab. These parameters justify the decreased number of relapses recorded within group A and placebo drop-outs; and this could affect the ITT analysis in favor of placebo when the total two-year recorded data are used. For PLP10 group, 14 relapses were reported at baseline and remained the same during the two-year study. For placebo, 20 relapses were reported at baseline and decreased to 13 during the two-



1  
2  
3 year study. This is expected since, for PLP10 group 43% of the drop-outs were under DMT at  
4 entry baseline and remained the same until the end of the study with no patient on  
5 natalizumab; but 57% of the placebo group drop-outs that were under DMT at entry baseline  
6 increased to 86% at the end of the study including two patients on natalizumab.  
7  
8  
9  
10

11  
12  
13  
14 The table section 4B reports comparison of 24 months pre-treatment ARR (baseline) to 24  
15 months on-treatment ARR of total randomized population, by treatment arm. The ARR of  
16 PLP10 group was 1.23 at baseline and 0.75 at the end of the study (39% reduction  $p=0.005$ ),  
17 and for placebo 1.08 at baseline and 1.03 at the end of the study (5% reduction  $p=0.652$ ). No  
18 statistical difference was calculated for the other two treatment arms. During the 24 months  
19 on-treatment, PLP10 group presented a 27% reduction of ARR versus placebo ( $p=0.121$ ),  
20 with all groups without statistically significant results.  
21  
22  
23  
24  
25  
26  
27  
28  
29

707

708

709

710

711

712

713

714

715

| <b>5.</b>                                                                                                            |                   |                            |                  |                    |                                      |
|----------------------------------------------------------------------------------------------------------------------|-------------------|----------------------------|------------------|--------------------|--------------------------------------|
| Characteristics*                                                                                                     | Group A<br>(n=10) | Group B<br>PLP10<br>(n=10) | Group C<br>(n=9) | Placebo<br>(n=12)  | P-value<br>Group<br>B vs.<br>Placebo |
| Annual relapse rate over 1 year**                                                                                    | <b>0.80</b>       | <b>0.40</b>                | <b>0.78</b>      | <b>0.83</b>        |                                      |
| Total number of relapses**                                                                                           | 8                 | 4                          | 7                | 10                 |                                      |
| <b>Primary end points</b>                                                                                            |                   |                            |                  |                    |                                      |
| Annual relapse rate over 2 years (95% CI)**                                                                          | 0.85              | <b>0.40 (0.15-0.87)</b>    | 0.72             | <b>1.04</b>        | <b>0.024</b>                         |
| Total number of relapses**                                                                                           | 17                | 8                          | 13               | 25                 |                                      |
| <b>Excluding patients on natalizumab</b>                                                                             |                   |                            |                  |                    |                                      |
| Annual relapse rate over 2 years (95% CI)                                                                            | 0.83              | <b>0.40 (0.10-0.79)</b>    | 0.72             | <b>0.95</b>        | <b>0.016</b>                         |
| Total number of relapses                                                                                             | 15                | <b>8</b>                   | 13               | <b>19</b>          |                                      |
| <b>Secondary end points</b>                                                                                          |                   |                            |                  |                    |                                      |
| Cumulative probability of sustained progression increase by 1 point on EDSS confirmed after 6 mo, over 2 years -% ** | 43                | <b>10 (1/10)</b>           | 24               | <b>58 (7/12)</b>   | <b>0.019</b>                         |
| <b>Excluding patients on natalizumab</b>                                                                             |                   |                            |                  |                    |                                      |
| cumulative probability of sustained progression increase by 1 point on EDSS confirmed after 6 mo, over 2 years -%    | 33                | <b>10 (1/10)</b>           | 24               | <b>70 (7/10)</b>   | <b>0.006</b>                         |
| <b>Exploratory Results</b>                                                                                           |                   |                            |                  |                    |                                      |
| Patients proportion with ≤1 relapse over 2 years -% **                                                               | 50 (5/10)         | <b>90 (9/10)</b>           | 56 (5/9)         | <b>42 (5/12)</b>   | <b>0.030</b>                         |
| <b>MRI</b>                                                                                                           |                   |                            |                  |                    |                                      |
| Patients proportion with new or enlarging T2 lesions-% **                                                            | ----              | <b>29 (2/7)</b>            | ----             | <b>67 (4/6)</b>    |                                      |
| <b>Excluding patients on natalizumab</b>                                                                             |                   |                            |                  |                    |                                      |
| Patients proportion with no new or enlarging T2 lesions-%                                                            | ----              | <b>29 (2/7)</b>            | ----             | <b>80 (4/5)</b>    |                                      |
| <b>DMT (interferons, glatiramer acetate) and natalizumab</b>                                                         |                   |                            |                  |                    |                                      |
| Patients proportion on DMT and natalizumab at the end of 2 years-% **                                                | 80 (8/10)†        | <b>60 (6/10)</b>           | 67 (6/9)         | <b>75 (9/12) ‡</b> | <b>0.747</b>                         |
| * CI denotes confidence interval.                                                                                    |                   |                            |                  |                    |                                      |
| ** Including patients on natalizumab                                                                                 |                   |                            |                  |                    |                                      |
| † 1 out of 10 on natalizumab                                                                                         |                   |                            |                  |                    |                                      |
| ‡ 2 out of 12 on natalizumab                                                                                         |                   |                            |                  |                    |                                      |

**Table 5.** Clinical end points, according to study group for all-time on-study population.

716

1  
2  
3 717 Acknowledgments: We thank all participant patients. We thank Thyrsos Posporis MD and the  
4  
5 718 central reading centre (Ayios Therissos Medical Diagnostic Centre, Nicosia, Cyprus), and  
6  
7 719 Eleni Eracleous, MD (neuroradiologist) for the contribution on the MRI scans and their team  
8  
9  
10 720 for the MRI reading. Special thanks to Elena Kkolou the pharmacist involved in the study and  
11  
12 721 Eftychia Gaglia for her nursing contribution and collection of blood from the patients. We  
13  
14 722 also thank Demetris Hadjisofoklis and Ioanna Leontiou (University of Nicosia, Helix  
15  
16 723 Business incubator) for their contribution on randomization process, data collection, filing  
17  
18 724 and blind codes keeping. Additionally we would like to thank the CING for hosting the  
19  
20 725 project. Moreover, we thank the Cyprus Ministry of Commerce, Industry and Tourism for  
21  
22 726 funding the project; and Yasoo Health Ltd., for providing some of the raw materials in  
23  
24 727 exchange of investigating, on their behalf, the efficacy and safety of  $\gamma$ -tocopherol.  
25  
26  
27  
28

29  
30 729 Contributors: All authors interpreted the data. I.S.P drafted the report and figures and all  
31  
32 730 authors critically revised and approved the final version. M.C.P and I.S.P were responsible  
33  
34 731 for the protocol and study design. M.C.P was the evaluator of patients' clinical progress signs  
35  
36 732 and the treatment physician. I.S.P and G.N.L were involved in the non-pharmacologic  
37  
38 733 treatment-related care. I.S.P performed the literature search and both I.S.P and G.N.L  
39  
40 734 contributed on the intervention formulation and composition rational. I.S.P supervised the  
41  
42 735 composition procedure of the interventions and the fatty acid profile analysis of the red blood  
43  
44 736 cell membranes. E.E.N and I.S.P performed the statistical analyses. E.E.N was an  
45  
46 737 independent scientist. All authors vouch for the accuracy and completeness of the data and  
47  
48 738 the statistical analyses.  
49  
50  
51  
52  
53  
54  
55  
56  
57  
58  
59  
60

1  
2  
3 740 Funding: Supported by a grand from the Cyprus Ministry of Commerce, Industry and  
4  
5 741 Tourism, program for the creation of new high technology and innovation enterprises through  
6  
7 742 the business incubator.  
8

9  
10 743

11 744 Competing interest: M.C.P, G.N.L, I.S.P received grand support from the Cyprus Ministry of  
12  
13 745 Commerce, Industry and Tourism, Program for the Creation of New High Technology and  
14  
15 746 Innovation Enterprises through the Business Incubator. PALUPA Medical Ltd. is a research  
16  
17 747 company formed and registered for completion of the study, as required by the Governments'  
18  
19 748 funding grand program. M.C.P, G.N.L, I.S.P, and CING are all stockholders of the PALUPA  
20  
21 749 Medical Ltd. M.C.P is an employee at the CING. I.S.P is a senior research collaborator  
22  
23 750 hosted by the CING. G.N.L is a CING collaborator. E.E.N declares no-competing interest.  
24  
25  
26

27 751 No pharmaceutical companies were involved in this phase II clinical trial. The intervention is  
28  
29 752 under a USA provisional patent; Application Number 61469081.  
30  
31

32 753

33  
34 754 Ethical approval: Cyprus National bioethics committee (reference EEBK/EII/2005/10).  
35

36 755

37  
38 756 All authors have completed the Unified Competing Interest form at  
39  
40 757 [www.icmje.org/coi\\_disclosure.pdf](http://www.icmje.org/coi_disclosure.pdf) (available on request from the corresponding author) and  
41  
42 758 declare that (1) M.C.P, G.N.L, I.S.P have support from Cyprus Ministry of Commerce,  
43  
44 759 Industry and Tourism, Program for the Creation of New High Technology and Innovation  
45  
46 760 Enterprises through the Business Incubator for the submitted work; (2) E.E.N has no  
47  
48 761 relationships with Cyprus Ministry of Commerce, Industry and Tourism, or PLUPA Medical  
49  
50 762 Ltd. that might have an interest in the submitted work in the previous 3 years; (3) their  
51  
52 763 spouses, partners, or children have no financial relationships that may be relevant to the  
53  
54  
55  
56  
57  
58  
59  
60

1  
2  
3 764 submitted work; and (4) E.E.N has a non-financial interests that may be relevant to the  
4  
5 765 submitted work.  
6  
7

8 766  
9

10  
11 767 The Corresponding Author has the right to grant on behalf of all authors and does grant on  
12  
13 768 behalf of all authors, an exclusive license on a worldwide basis to the BMJ Publishing Group  
14  
15 769 Ltd and its Licensees to permit this article (if accepted) to be published in BMJ editions and  
16  
17 770 any other BMJ PGL products and sublicenses to exploit all subsidiary rights, as set out in our  
18  
19 771 license (<http://resources.bmj.com/bmj/authors/checklists-forms/licence-for-publication>)."  
20  
21  
22

23 772  
24  
25  
26

## Article Summary

### Article focus:

- The increasing prevalence of Multiple Sclerosis (MS), the limited efficacy and the side effects of the existing treatments urge the clinical need for the development of new, innovative, more effective, safe, and preventive treatment strategies.
  - For the first time we propose three original nutraceutical treatment intervention-cocktails, formulated based on systems medicine through nutritional systems biology rational; with PLP10 representing the complete composition of the formulation and the other two treatments represent partial formulations.
  - We have studied the proposed interventions on 80 relapsing remitting MS patients (four groups of 20 each) for a total of 42 months, in a randomized, double-blind, placebo-controlled, phase II proof-of-concept clinical trial.
- 27  
28  
29  
30  
31  
32  
33  
34  
35  
36  
37  
38  
39  
40  
41  
42  
43  
44  
45  
46  
47  
48  
49  
50  
51  
52  
53  
54  
55  
56  
57  
58  
59  
60

**Key messages:**

- The per-protocol data analyses indicated that PLP10 is associated with significant efficacy versus placebo on both reducing the annualized relapse rate and disease progression without any adverse or severe side effects.
- Overall, for this small size phase II study, a total of 41 (51%) patients completed the 42-month trial. For the per-protocol analysis of the two-year primary end point, 8 relapses were recorded in the PLP10 group (n=10) (0.40 ARR) versus 25 relapses in the placebo group (n=12) (1.04 ARR), a 64% adjusted relative rate reduction for the PLP10 group (RRR 0.36, 95% CI 0.15 to 0.87, p=0.024). In a subgroup analysis that excluded patients on monoclonal antibody (natalizumab) treatment, the observed adjusted RRR became stronger (72%) over the two years (RRR 0.28, 95% CI 0.10 to 0.79, p=0.016). Per-protocol analysis for the secondary outcome at two years, time to disability progression, was significantly longer only with PLP10. The cumulative probability of disability progression at two years was 10% in the PLP10 group and 58% in the placebo group (unadjusted log-rank p=0.019). In a subgroup analysis that excluded patients on natalizumab the cumulative probability of progression was 10% for the 10 patients in the PLP10 group and 70% for the 12 patients in the placebo group, a relative 86% decrease in the risk of sustained progression of disability in the PLP10 group (unadjusted log-rank p=0.006; adjusted hazard ratio, 0.11; 95% CI 0.01 to 0.97, p=0.047).
- PLP10 has probably the ability to interfere with the total known repertoire of mechanisms involved in MS pathogenesis as well as with the recovery mechanisms, neuroprotection and remyelination.; it is potentially able to manipulate global perturbed networks of the disease causing factors rather than focusing only on unique failing components.
- This proof-of-concept clinical study might be indicative and the beginning of new avenues in MS prevention and treatment and of new epoch of novel drug development

with dynamic therapeutic potential for chronic complex multifactorial diseases.

**Strengths and limitations of this study:**

- The strength of this study is the systems medicine therapeutic approach, the length of the study the inclusion of the six months normalization (chronotherapy) period, and the study protocol following all indicated appropriate guidelines with definite inclusion/exclusion criteria and primary/secondary end points.
- The sample size and the high rate of drop-outs (palatability of the formula) are the limitations associated with the present study.
- A phase III multi-center clinical trial will establish the present intervention regime among the best choices among neurodegenerative diseases prophylaxis and MS treatment drugs faretra.

773

774

775

776

777

778

779

780

781 **References**

- 782 1. Baranzini SE, Oksenberg JR, Hauser SL. New insights into the genetics of multiple  
783 sclerosis. *Journal of Rehabilitation Research and Development* 2002;39:201-210.
- 784 2. Goni J, Esteban FJ, de Mendizabal NV, et al. A computational analysis of protein-  
785 protein interaction networks in neurodegenerative diseases. *BMC Syst Biol*  
786 2008;2:52.
- 787 3. Lobo I. Multifactorial inheritance and genetic disease. *Nature Education* 2008; 1.
- 788 4. Compston A, Coles A. Multiple sclerosis. *Lancet* 2002;359:1221.
- 789 5. Evans PH. Free radicals in brain metabolism and pathology. *British Medical Bulletin*  
790 1993;49:577-587.
- 791 6. Knight J. Reactive oxygen species and the neurodegenerative disorders. *Ann Clin Lab*  
792 *Sci* 1997;27:11-25.
- 793 7. Matute C, Alberdi E, Domercq M, Pérez-Cerdá F, Pérez-Samartín A, Sánchez-Gómez  
794 MV. The link between excitotoxic oligodendroglial death and demyelinating diseases.  
795 *Trends in Neurosciences* 2001;24:224-230.
- 796 8. Owens T. The enigma of multiple sclerosis: inflammation and neurodegeneration  
797 cause heterogeneous dysfunction and damage. *Current Opinion in Neurology*  
798 2003;16:259-265.
- 799 9. Smith KJ, Kapoor R, Felts PA. Demyelination: The role of reactive oxygen and  
800 nitrogen species. *Brain Pathology* 1999;9:69-92.
- 801 10. Ahn AC, Tewari M, Poon C-S, Phillips RS. The Clinical Applications of a Systems  
802 Approach. *PLoS Med* 2006;3:e209.
- 803 11. van Meeteren ME, Teunissen CE, Dijkstra CD, van Tol EAF. Antioxidants and  
804 polyunsaturated fatty acids in multiple sclerosis. *Eur J Clin Nutr* 2005;59:1347-1361.



- 1  
2  
3 805 12. Calder PC. n-3 Polyunsaturated fatty acids, inflammation, and inflammatory diseases.  
4  
5 806 The American Journal of Clinical Nutrition 2006;83:S1505-1519S.  
6  
7 807 13. Piani D, Fontana A. Involvement of the cystine transport system xc- in the  
8  
9 808 macrophage- induced glutamate-dependent cytotoxicity to neurons. The Journal of  
10  
11 809 Immunology 1994;152:3578-3585.  
12  
13 810 14. Youdim KA, Martin A, Joseph JA. Essential fatty acids and the brain: possible health  
14  
15 811 implications. International Journal of Developmental Neuroscience 2000;18:383-399.  
16  
17 812 15. Calder PC. Dietary modification of inflammation with lipids. Proceedings of the  
18  
19 813 Nutrition Society 2002;61:345-358.  
20  
21 814 16. Gil Á. Polyunsaturated fatty acids and inflammatory diseases. Biomedecine &  
22  
23 815 Pharmacotherapy 2002;56:388-396.  
24  
25 816 17. Ariel A, Serhan CN. Resolvins and protectins in the termination program of acute  
26  
27 817 inflammation. Trends in Immunology 2007;28:176-183.  
28  
29 818 18. Arita M, Ohira T, Sun Y-P, Elangovan S, Chiang N, Serhan CN. Resolvin E1  
30  
31 819 selectively interacts with leukotriene B4 receptor BLT1 and chemR23 to regulate  
32  
33 820 inflammation. The Journal of Immunology 2007;178:3912-3917.  
34  
35 821 19. Janakiram NB, Rao CV. Role of Lipoxins and Resolvins as Anti-Inflammatory and  
36  
37 822 Proresolving Mediators in Colon Cancer. Current Molecular Medicine 2009;9:565-  
38  
39 823 579.  
40  
41 824 20. Serhan C, Arita M, Hong S, Gotlinger K. Resolvins, docosatrienes, and  
42  
43 825 neuroprotectins, novel omega-3-derived mediators, and their endogenous aspirin-  
44  
45 826 triggered epimers. Lipids 2004;39:1125-1132.  
46  
47 827 21. Serhan CN, Chiang N, Van Dyke TE. Resolving inflammation: dual anti-  
48  
49 828 inflammatory and pro-resolution lipid mediators. Nat Rev Immunol 2008;8:349-361.  
50  
51  
52  
53  
54  
55  
56  
57  
58  
59  
60

- 1  
2  
3 829 22. Rossetti RG, Seiler C, DeLuca P, Laposata M, Zurier R. Oral administration of  
4  
5 830 unsaturated fatty acids: effects on human peripheral blood T lymphocyte proliferation.  
6  
7 831 Journal of Leukocyte Biology 1997;62:438-443.  
8  
9  
10 832 23. Vatassery G. Vitamin E and other endogenous antioxidants in the central nervous  
11  
12 833 system. Geriatrics 1998a;53:S25–S27.  
13  
14 834 24. Fukuzawa K, Gebicki JM. Oxidation of [alpha]-tocopherol in micelles and liposomes  
15  
16 835 by the hydroxyl, perhydroxyl, and superoxide free radicals. Archives of Biochemistry  
17  
18 836 and Biophysics 1983;226:242-251.  
19  
20  
21 837 25. Christen S, Woodall AA, Shigenaga MK, Southwell-Keely PT, Duncan MW, Ames  
22  
23 838 BN.  $\gamma$ -Tocopherol traps mutagenic electrophiles such as NO<sub>x</sub> and complements  $\alpha$ -  
24  
25 839 tocopherol: Physiological implications. Proceedings of the National Academy of  
26  
27 840 Sciences of the United States of America 1997;94:3217-3222.  
28  
29  
30 841 26. Brigelius-Flohé R, Kelly FJ, Salonen JT, Neuzil J, Zingg J-M, Azzi A. The European  
31  
32 842 perspective on vitamin E: current knowledge and future research. The American  
33  
34 843 Journal of Clinical Nutrition 2002;76:703-716.  
35  
36 844 27. Calder P. Polyunsaturated fatty acids, inflammatory processes and inflammatory  
37  
38 845 bowel diseases Mol Nutr Food Res 2008;52:885–897  
39  
40  
41 846 28. Edwards IJ, O'Flaherty JT. Omega-3 Fatty Acids and PPAR $\gamma$  in Cancer. PPAR  
42  
43 847 Research 2008;2008:1-15.  
44  
45 848 29. Groeger AL, Cipollina C, Cole MP, et al. Cyclooxygenase-2 generates anti-  
46  
47 849 inflammatory mediators from omega-3 fatty acids. Nat Chem Biol 2010;6:433-441.  
48  
49  
50 850 30. Dyall SC, Michael GJ, Michael-Titus AT. Omega-3 fatty acids reverse age-related  
51  
52 851 decreases in nuclear receptors and increase neurogenesis in old rats. Journal of  
53  
54 852 Neuroscience Research 2010;88:2091-2102.  
55  
56  
57  
58  
59  
60

- 1  
2  
3 853 31. McNamara RK. DHA Deficiency and Prefrontal Cortex Neuropathology in Recurrent  
4  
5 854 Affective Disorders. *The Journal of Nutrition* 2010;140:864-868.  
6  
7 855 32. Salvati S, Natali F, Attorri L, et al. Eicosapentaenoic acid stimulates the expression of  
8  
9 856 myelin proteins in rat brain. *Journal of Neuroscience Research* 2008;86:776-784.  
10  
11 857 33. Abraham M, Shapiro S, Karni A, Weiner HL, Miller A. Gelatinases (MMP-2 and  
12  
13 858 MMP-9) are preferentially expressed by Th1 vs. Th2 cells. *Journal of*  
14  
15 859 *Neuroimmunology* 2005;163:157-164.  
16  
17 860 34. C ffrench-Constant. Pathogenesis of multiple sclerosis. *The Lancet* 1994;343:271-  
18  
19 861 275.  
20  
21 862 35. Leppert D, Lindberg RLP, Kappos L, Leib SL. Matrix metalloproteinases:  
22  
23 863 multifunctional effectors of inflammation in multiple sclerosis and bacterial  
24  
25 864 meningitis. *Brain Research Reviews* 2001;36:249-257.  
26  
27 865 36. Curtis CL, Rees SG, Cramp J, et al. Effects of n-3 fatty acids on cartilage metabolism.  
28  
29 866 *Proceedings of the Nutrition Society* 2002;61:381-389.  
30  
31 867 37. Harris MA, Hansen RA, Vidsudhiphan P, et al. Effects of conjugated linoleic acids  
32  
33 868 and docosahexaenoic acid on rat liver and reproductive tissue fatty acids,  
34  
35 869 prostaglandins and matrix metalloproteinase production. *Prostaglandins, Leukotrienes*  
36  
37 870 *and Essential Fatty Acids* 2001;65:23-29.  
38  
39 871 38. McCabe A, Wallace J, Gilmore W, Strain J, McGlynn H. The effect of  
40  
41 872 eicosapentanoic acid on matrix metalloproteinase gene expression. *Lipids*  
42  
43 873 1999;34:S217-S218.  
44  
45 874 39. Shinto L, Marracci G, Bumgarner L, Yadav V. The Effects of Omega-3 Fatty Acids  
46  
47 875 on Matrix Metalloproteinase-9 Production and Cell Migration in Human Immune  
48  
49 876 Cells: Implications for Multiple Sclerosis. *Autoimmune Diseases* 2011;2011.

- 1  
2  
3 877 40. Auffray C, Chen Z, Hood L. Systems medicine: the future of medical genomics and  
4  
5 878 healthcare. *Genome Med* 2009;1:2.  
6  
7 879 41. Huang WL, King VR, Curran OE, et al. A combination of intravenous and dietary  
8  
9 880 docosahexaenoic acid significantly improves outcome after spinal cord injury. *Brain*  
10  
11 881 2007;130:3004-3019.  
12  
13 882 42. Marangoni F, Angeli MT, Colli S, et al. Changes of n – 3 and n – 6 fatty acids in  
14  
15 883 plasma and circulating cells of normal subjects, after prolonged administration of 20:5  
16  
17 884 (EPA) and 22:6 (DHA) ethyl esters and prolonged washout. *Biochimica et Biophysica*  
18  
19 885 *Acta (BBA) - Lipids and Lipid Metabolism* 1993;1210:55-62.  
20  
21 886 43. Martínez M, Vázquez E, García-Silva MT, et al. Therapeutic effects of  
22  
23 887 docosahexaenoic acid ethyl ester in patients with generalized peroxisomal disorders1.  
24  
25 888 *The American Journal of Clinical Nutrition* 2000;71:376S-385S.  
26  
27 889 44. Committee for medicinal products for human use. Guideline on clinical trials in small  
28  
29 890 populations In: *European Medicines Agency, 2006: 1-10.*  
30  
31 891 45. Gerard E Dallal. *The Little Handbook of Statistical Practice*. [online]. Available at  
32  
33 892 URL|. Accessed Date Accessed, Year|.  
34  
35 893 46. Wang YC, Meyerson L, Tang YQ, Qian N. Statistical methods for the analysis of  
36  
37 894 relapse data in MS clinical trials. *Journal of the Neurological Sciences* 2009;285:206-  
38  
39 895 211.  
40  
41 896 47. Polman CH, O'Connor PW, Havrdova E, et al. A randomized, placebo-controlled trial  
42  
43 897 of natalizumab for relapsing multiple sclerosis. *The New England Journal of*  
44  
45 898 *Medicine* 2006;354:899-910.  
46  
47 899 48. Kappos L, Radue E-W, O'Connor P, et al. A Placebo-Controlled Trial of Oral  
48  
49 900 Fingolimod in Relapsing Multiple Sclerosis. *New England Journal of Medicine*  
50  
51 901 2010;362:387-401.  
52  
53  
54  
55  
56  
57  
58  
59  
60

- 1  
2  
3 902 49. Cunnane S, Ho S, Dore-Duffy P, Ells K, Horrobin D. Essential fatty acid and lipid  
4 profiles in plasma and erythrocytes in patients with multiple sclerosis. *The American*  
5 903 *Journal of Clinical Nutrition* 1989;50:801-806.  
6  
7 904  
8  
9 905 50. Harbige LS, Sharief MK. Polyunsaturated fatty acids in the pathogenesis and  
10 treatment of multiple sclerosis. *British Journal of Nutrition* 2007;98:S46-S53.  
11 906  
12 907 51. Wilson R, Tocher D. Lipid and fatty acid composition is altered in plaque tissue from  
13 multiple sclerosis brain compared with normal brain white matter. *Lipids* 1991;26:9-  
14 908 15.  
15  
16 909  
17 910 52. Rafat AS, Saame RS, Laura AS, Heidi RY, William S, Gary PZ. Omega 3-Fatty  
18 Acids: Health Benefits and Cellular Mechanisms of Action. *Mini Reviews in*  
19 911 *Medicinal Chemistry* 2004;4:859-871.  
20 912  
21 913 53. Shaikh SR, Edidin M. Polyunsaturated fatty acids, membrane organization, T cells,  
22 and antigen presentation. *The American Journal of Clinical Nutrition* 2006;84:1277-  
23 914 1289.  
24 915  
25 916 54. Lajtha A, Toth J, Fujimoto K, Agrawal CH. Turnover of Myelin Proteins in Mouse  
26 Brain in vivo. *Biochem J* 1977;164:323-329.  
27 917  
28 918 55. LeBaron FN, Sanyal S, Jungalwala FB. Turnover rate of molecular species of  
29 sphingomyelin in rat brain. *Neurochemical Research* 1981;6:1081-1089.  
30 919  
31 920 56. Yao JK. Increased polyunsaturated fatty acids in developing and regenerating  
32 peripheral nerve. *Biochimica et Biophysica Acta (BBA) - Lipids and Lipid*  
33 921 *Metabolism* 1982;712:542-546.  
34 922  
35 923 57. Riccio P. The molecular basis of nutritional intervention in multiple sclerosis: a  
36 narrative review. *Complement Ther Med* 2011;19:228-237.  
37 924  
38 925 58. Farinotti M, Simi S, Di Pietrantonj C, McDowell N, et al. Dietary interventions for  
39 multiple sclerosis (Review), the Cochrane Library 2007, issue I.  
40 926  
41  
42  
43  
44  
45  
46  
47  
48  
49  
50  
51  
52  
53  
54  
55  
56  
57  
58  
59  
60

1  
2  
3 927 **Figure legends**  
4

5  
6 928 **Figure 1.** Study Flowchart  
7

8  
9 929 **Figure 2.** Omega-6 and omega-3 PUFA, their respective metabolic derivatives and their  
10  
11 possible effects on inflammation.  
12

13  
14  
15 931 After consumption, the PUFAs are metabolized via several pathways (not shown) to active  
16  
17 932 compounds that mediate inflammation and products that promote resolution of inflammation.  
18

19  
20 933 Abbreviations: PL, phospholipid; IFN- $\gamma$ , interferon  $\gamma$ ; IL-2, interleukin 2; NF $\kappa$ B, nuclear  
21  
22 934 factor kappa B; PGE<sub>2</sub>, prostaglandin E<sub>2</sub>; PPAR $\gamma$ , peroxisome proliferator-activated receptor  
23  
24 935  $\gamma$ ; PUFAs, polyunsaturated fatty acids; TGF $\beta$ , transforming growth factor  $\beta$ ; TNF, tumor  
25  
26 936 necrosis factor; COX, cyclooxygenase; hydroxyeicosatetraenoic acid; HPETE,  
27  
28 937 hydroperoxyeicosatetraenoic acid; LOX, lipoxygenase; LT, leukotriene; PG, prostaglandin;  
29  
30 938 TX, thromboxane; RXR- $\gamma$ , retinoid X receptor-gamma; Nrf2, nuclear respiratory factor;  
31  
32 939 MMP, metalloproteinase.  
33  
34

35  
36  
37 940 **Figure 3.** Panel A demonstrates the ARR of all-time on-study patients during the 24mo pre-  
38  
39 941 treatment (baseline ARR) and at different on-study intervals (6, 12, 18, 24 mo) per treatment  
40  
41 942 arm. \*\*  
42

43  
44 943 Panel B demonstrates the ARR of all-time on-study population between 0-6, 6-12, 6-18, and  
45  
46 944 6-24 mo period intervals, of PLP10 vs. placebo group. \*\*  
47

48  
49 945 Panel C demonstrates the ARR of all-time on-study population of PLP10 vs. placebo group at  
50  
51 946 baseline, during 1<sup>st</sup> year, and during the 2-year on-treatment. \*\*  
52

53  
54  
55 947 Panel D demonstrates the dispersion of relapses throughout the 2-year period of all-time on-  
56  
57 948 study (excluding patients on natalizumab) of PLP10 (n=10) vs. placebo (n=10). Placebo  
58  
59  
60

1  
2  
3 949 shows an irregular dispersion of relapses in relation to PLP10 group with linear increasing  
4  
5 950 trend while PLP10 shows a stabilized linear trend. By using the per-protocol model where  
6  
7 951 patients on natalizumab were excluded, we could compare the number of relapses on a same  
8  
9 952 number of patients.

10  
11  
12  
13 953 \*\* Including the patients on natalizumab.

14  
15  
16 954 **Figure 4.** Panel 4A demonstrates the Kaplan–Meier plot of the time to sustained progression  
17  
18 955 of disability among all-time on-study patients, excluding patients on natalizumab, receiving  
19  
20 956 intervention A, PLP10 and C as compared with placebo. PLP10 reduced the risk of sustained  
21  
22 957 progression of disability by 86% over two years (p=0.006). Intervention formula A reduced  
23  
24 958 the risk of sustained progression of disability by 53% (p=0.266) and intervention formula C  
25  
26 959 by 67% (p=0.061).

27  
28  
29  
30 960 Panel 4B demonstrates the Kaplan–Meier plot of the time to sustained progression of  
31  
32 961 disability among ITT population receiving intervention A, PLP10 and C as compared with  
33  
34 962 placebo. PLP10 reduced the risk of sustained progression of disability by 71% over two years  
35  
36 963 (p=0.052, trend). Intervention formula A reduced the risk of sustained progression of  
37  
38 964 disability by 22% (p=0.727) and intervention formula C by 40% (p=0.447).

39  
40  
41 965 **Figure 5.** Mean change in expanded disability status scale score as a function of visit  
42  
43 966 number. Values are expressed as mean ± s.e.m.

44  
45  
46  
47 967 ¶ Including patients on natalizumab

48  
49  
50 968 ¶¶ Excluding patients on natalizumab

51  
52  
53 969

1 **A novel oral nutraceutical formula of omega-3 and omega-**  
2 **6 fatty acids with vitamins (PLP10) in relapsing remitting**  
3 **multiple sclerosis: a randomized, double-blind, placebo-**  
4 **controlled proof-of-concept clinical trial**

5 **Marios C. Pantzaris\***, George N. Loukaides, Evangelia E. Ntzani, Ioannis  
6 **S. Patrikios\***

7 \* Both M.C.P and I.S.P are the first authors and both are the corresponding authors

8  
9 The Cyprus Institute of Neurology and Genetics (CING) 1683 Nicosia, Cyprus Marios C.  
10 Pantzaris Senior Consultant Neurologist Neurology Clinic C and PALUPA Medical Ltd., The  
11 Cyprus Institute of Neurology and Genetics (CING) 1683 Nicosia, Cyprus George N.  
12 Loukaides Clinical Dietitian/Nutritionist Neurology Clinic and PALUPA Medical Ltd.,  
13 University of Ioannina School of Medicine (UISM) 45110 Ioannina, Greece Evangelia E.  
14 Ntzani Assistant Professor Clinical and Molecular Epidemiology Unit, Department of  
15 Hygiene and Epidemiology, PALUPA Medical Ltd at The Cyprus Institute of Neurology and  
16 Genetics (CING) 1683 Nicosia, Cyprus Ioannis S. Patrikios Senior Research Scientist,  
17 visiting Professor at European University Cyprus Nicosia, Cyprus, Department of Health and  
18 Science. Correspondence should be addresses to e-mail: [I.Patrikios@euc.ac.cy](mailto:I.Patrikios@euc.ac.cy) or  
19 [pantzari@cing.ac.cy](mailto:pantzari@cing.ac.cy)



1  
2  
3 22 **Correspondence to:**  
4

5 23 **Ioannis Patrikios**

6  
7 24 The Cyprus Institute of Neurology and Genetics (CING)

8  
9 25 Neurology Clinic C (PALUPA Medical),

10  
11 26 6 International Airport Av.

12  
13 27 P.O.Box 23462, 1683 Ayios Dometios. Nicosia, Cyprus

14  
15 28 Tel: +357 22 358 600, +357 99 097 856;

16  
17 29 [i.patrikios@euc.ac.cy](mailto:i.patrikios@euc.ac.cy)

18  
19 30 [patrikiosioannis@gmail.com](mailto:patrikiosioannis@gmail.com)  
20  
21  
22  
23  
24  
25  
26  
27  
28  
29  
30  
31

32 **AND**

33  
34 **Marios Pantzaris**

35 The Cyprus Institute of Neurology and Genetics (CING)

36 Neurology Clinic C (PALUPA Medical),

37 6 International Airport Av.

38 P.O.Box 23462, 1683 Ayios Dometios, Nicosia Cyprus

39 Tel: +357 22 358 600; +357 99 677 067

40 [pantzari@cing.ac.cy](mailto:pantzari@cing.ac.cy)  
41  
42  
43  
44  
45  
46  
47  
48  
49  
50  
51  
52  
53  
54

42 **Keywords:** antioxidant vitamins, polyunsaturated fatty acids, multiple sclerosis, systems  
43 medicine, randomized clinical trial.  
44

55  
56 **Word Count:** 6299  
57  
58  
59  
60

1  
2  
3 **Abstract**  
4

5 **Objective** To assess whether our three novel interventions, formulated based on systems  
6  
7  
8  
9  
10  
11  
12  
13  
14  
15  
16  
17  
18  
19  
20  
21  
22  
23  
24  
25  
26  
27  
28  
29  
30  
31  
32  
33  
34  
35  
36  
37  
38  
39  
40  
41  
42  
43  
44  
45  
46  
47  
48  
49  
50  
51  
52  
53  
54  
55  
56  
57  
58  
59  
60  
61  
62  
63  
64  
65  
66  
67  
68  
69  
70

medicine therapeutic concept reduce disease activity in patients with relapsing remitting multiple sclerosis who were either treated with disease modifying treatment or untreated.

**Design** 30-month randomized double-blind, placebo-controlled, parallel design, phase II proof-of-concept clinical study.

**Settings** Cyprus Institute of Neurology and Genetics (CING)

**Participants and Interventions** 80 subjects were randomized into four groups of 20. The first intervention (A) was composed of omega-3 and omega-6 polyunsaturated fatty acids at 1:1 wt/wt. Specifically, the omega-3 fatty acids were docosahexaenoic acid (DHA) and eicosapentaenoic acid (EPA) at 3:1 wt/wt and the omega-6 fatty acids were linoleic acid (LA) and gamma ( $\gamma$ )-linolenic acid (GLA) at 2:1 wt/wt. This intervention also included minor quantities of other specific polyunsaturated, monounsaturated and specific saturated fatty acids as well as vitamin A and vitamin E (alpha-tocopherol). The third intervention (C) was  $\gamma$ -tocopherol alone. The second intervention (PLP10) was a combination of A and C. A fourth group of 20 received a vehicle placebo. The interventions were administered per os once daily.

**Main outcome measures** The primary endpoint was the annualized relapse rate (ARR) of the three interventions versus placebo at two years. The secondary end point was the time to confirmed disability progression at two years.

1  
2  
3 71 **Results** A total of 41 (51%) patients completed the 42-month trial. Overall, for the per-  
4  
5 72 protocol analysis of the two-year primary end point, 8 relapses were recorded in the PLP10  
6  
7 73 group (n=10) (0.40 ARR) versus 25 relapses in the placebo group (n=12) (1.04 ARR), a 64%  
8  
9 74 adjusted relative rate reduction for the PLP10 group (RRR 0.36, 95% CI 0.15 to 0.87,  
10  
11 75 p=0.024). In a subgroup analysis that excluded patients on monoclonal antibody  
12  
13 76 (natalizumab) treatment, the observed adjusted RRR became stronger (72%) over the two  
14  
15 77 years (RRR 0.28, 95% CI 0.10 to 0.79, p=0.016). Per-protocol analysis for the secondary  
16  
17 78 outcome at two years, time to disability progression, was significantly longer only with  
18  
19 79 PLP10. The cumulative probability of disability progression at two years was 10% in the  
20  
21 80 PLP10 group and 58% in the placebo group (unadjusted log-rank p=0.019). In a subgroup  
22  
23 81 analysis that excluded patients on natalizumab the cumulative probability of progression was  
24  
25 82 10% for the 10 patients in the PLP10 group and 70% for the 12 patients in the placebo group,  
26  
27 83 a relative 86% decrease in the risk of sustained progression of disability in the PLP10 group  
28  
29 84 (unadjusted log-rank p=0.006; adjusted hazard ratio, 0.11; 95% CI 0.01 to 0.97, p=0.047). No  
30  
31 85 adverse events were reported. Interventions A (10 patients) and C (9 patients) showed no  
32  
33 86 significant efficacy.  
34  
35  
36  
37  
38  
39  
40

41 88 **Conclusions** In this small proof-of-concept randomized double-blind clinical trial, PLP10  
42  
43 89 treatment significantly reduced the ARR, and the risk of sustained disability progression  
44  
45 90 without any reported serious adverse events. Larger studies are needed to further assess the  
46  
47 91 safety and efficacy of PLP10.  
48  
49  
50

51  
52 93 **Trial registration** International Standard Randomized Controlled Trial, number  
53  
54 94 ISRCTN87818535.  
55  
56  
57  
58  
59  
60

## 96 Introduction

97 Multiple sclerosis (MS) is a complex multifactorial disease that results from interplay  
98 between as yet unidentified environmental factors and susceptibility genes.<sup>1-3</sup> Together, these  
99 factors trigger a cascade of events, involving engagement of the immune system,  
100 inflammatory injury of myelin, axons and glia, functional recovery and structural repair,  
101 gliosis, and neurodegeneration.<sup>4</sup> The bio-mechanisms involved are: immune-mediated  
102 inflammation, oxidative stress and excitotoxicity.<sup>5-9</sup> These mechanisms may all contribute to  
103 oligodendrocyte and neuronal damage and even cell death, hence promoting disease  
104 progression. The increasing prevalence of MS, the limited efficacy and the side effects of the  
105 existing treatments urge the clinical need for the development of new, innovative, more  
106 effective, safe, and preventive treatment strategies.

107  
108 Research has shown that multiple variables dynamically interact and many different complex  
109 interrelated processes are simultaneously orchestrated for MS pathogenesis. The fundamental  
110 distinctiveness of systems medicine (SM) is not just the recognition that different specific  
111 complex factors are important in disease management, but that they need to be incorporated  
112 in some meaningful way to treatment selection and delivery.<sup>10</sup> The primary challenge tackled  
113 by systems scientific approach is the elucidation of how these multiple variables dynamically  
114 interact and how one can apply this understanding to affect the system and achieve a  
115 desirable end.<sup>10</sup> The answer might be the simultaneous interference with all involved  
116 perturbed mechanisms, by using a cocktail of different specific ingredients, potentially able  
117 through synergistic effect to give a long, holistic and effective treatment (Supplementary  
118 Information Methods 1).

119

1  
2  
3 120 The polyunsaturated fatty acids (PUFA) composition of membrane phospholipids plays a  
4  
5 121 direct role in immune and non-immune related inflammation. PUFA and antioxidant  
6  
7 122 deficiencies along with decreased cellular antioxidant defense mechanisms have been  
8  
9 123 reported for MS patients.<sup>11</sup>The cause of these PUFA deficiencies is not entirely clear and may  
10  
11 124 involve metabolic and nutritional alterations.<sup>11</sup>  
12  
13  
14  
15

16 126 Increased or uncontrolled inflammation contributes to several different acute and chronic  
17  
18 127 diseases and it is characterized by the production of inflammatory cytokines, arachidonic acid  
19  
20 128 (AA)-derived eicosanoids (prostaglandins (PGs), thromboxanes (TXs), leukotrienes (LTs),  
21  
22 129 and other oxidized derivatives), other inflammatory agents such as reactive oxygen species  
23  
24 130 (ROS) , nitric oxide (NO), and adhesion molecules (Fig 2).<sup>12</sup> During inflammation glutamate  
25  
26 131 homeostasis is altered by activated immune cells releasing increased quantities of glutamate  
27  
28 132 that can result in over activation of glutamate receptors and in return excitotoxic  
29  
30 133 oligodendroglial death.<sup>7, 13</sup> As such, among others, membrane-related pathology, immune-  
31  
32 134 mediated inflammation, oxidative stress and excitotoxicity provide potentially useful  
33  
34 135 combined targets for intervention in MS.  
35  
36  
37  
38  
39  
40

41 137 *In vitro and in vivo* studies have demonstrated that dietary EPA, DHA, LA, and GLA can be  
42  
43 138 implicated and modulate almost all known complex network of events and pathways  
44  
45 139 repertoire in MS pathophysiology. Brain membrane fatty acid composition can be modified  
46  
47 140 with dietary supplementation, but the process has been showed to be age dependent (it takes  
48  
49 141 much longer in adults versus developing brains) as well as possibly dependent on the  
50  
51 142 quantities of the dietary/supplemented PUFAs.<sup>14</sup> Both human and animal studies proved that  
52  
53 143 diets high in DHA and EPA increase the proportion of these PUFA in the membranes of  
54  
55 144 inflammatory cells and reduce the levels of AA.<sup>12, 15</sup> The anti-inflammatory properties of  
56  
57  
58  
59  
60

1  
2  
3 145 omega-3 include production of PGs and TXs of the 3-series and LTs of the 5-series (Fig 2).<sup>14</sup>  
4  
5 146 <sup>16</sup> Resolvins and protectins are biosynthesized from omega-3 fatty acids via cyclooxygenase-  
6  
7 147 2/lipoxygenase (COX-2/LOX) pathways and they promote control of inflammation in neural  
8  
9 148 tissues (Fig 2).<sup>17-21</sup> T-cell proliferation in acute and chronic inflammation can be reduced by  
10  
11 149 supplementation with either omega-6 or omega-3 PUFA.<sup>22</sup> Furthermore, vitamin E is an  
12  
13 150 important antioxidant that can interrupt the propagation of free radical chain reactions.<sup>23</sup>  
14  
15 151 Vitamin E (alpha-tocopherol, an isoform of vitamin E) efficiently detoxifies hydroxyl,  
16  
17 152 perhydroxyl and superoxide free radicals.<sup>24</sup> However  $\gamma$ -tocopherol (another isoform of  
18  
19 153 vitamin E) seems to be more efficiently implicated in trapping NO radicals.<sup>25</sup> In addition  
20  
21 154 alpha-tocopherol exerts non-antioxidant properties, including modulation of cell signaling  
22  
23 155 and immune function, regulation of transcription, and induction of apoptosis.<sup>26</sup>  
24  
25  
26  
27 156  
28  
29 157 Moreover, omega-3 fatty acids electrophilic derivatives formed by COX-2, in activated  
30  
31 158 macrophages can stimulate the nuclear respiratory factor (Nrf2) inducing the transcription of  
32  
33 159 neuroprotective and antioxidant related genes, and can activate the peroxisome proliferator-  
34  
35 160 activated receptor (PPAR) $\gamma$  for anti-inflammatory response.<sup>27-29</sup> In animal studies, EPA and  
36  
37 161 DHA proved to be endogenous ligands of RXRs, with positive effect on neurogenesis.<sup>30</sup>  
38  
39 162 Additionally, in 2008 Salvati and coworkers reported evidense of accelerated myelination in  
40  
41 163 DHA- and EPA-treated animals.<sup>32</sup> Moreover, DHA and EPA are reported to significantly  
42  
43 164 decrease the levels of metalloproteinases (MMP) -2, -3, -9, and -13 with a significant role in  
44  
45 165 the migration of lymphocytes into the CNS by inducing disruption of the blood brain barrier  
46  
47 166 (BBB), an important step in the formation of MS lesions.<sup>33-39</sup>  
48  
49  
50  
51 167  
52  
53 168 Based on the above, specific PUFA and antioxidant vitamins fulfill the criterion of biologic  
54  
55 169 plausibility and have the potential to diminish MS symptoms severity and activity, even  
56  
57  
58  
59  
60

1  
2  
3 170 promoting recovery (remyelination).<sup>11</sup> Overall, PLP10 contains multiple ingredients (omega-  
4  
5 171 3, omega-6 and other fatty acids and vitamins) potentially able to modulate key  
6  
7 172 interconnected components (i.e. genes, proteins) and structural molecules (i.e. cellular  
8  
9 173 membrane lipids, receptors) within the functional network of events of MS pathogenesis.<sup>40</sup>  
10  
11  
12 174

13  
14 175 This is a randomized phase II, single-center, double-blind, placebo-controlled, proof-of-  
15  
16 176 concept clinical trial evaluating the therapeutic ability of PLP10 and of two other  
17  
18 177 interventions (A and C) consisting of PLP10 constituent partial fractions (Table 1) versus  
19  
20 178 placebo on RRMS patients.  
21  
22  
23 179  
24  
25 180  
26  
27

## 28 181 **Methods**

### 29 182 **Patients**

30  
31  
32 183 Eligibility criteria were an age of 18 to 65; a diagnosis of RRMS according to the McDonald  
33  
34 184 criteria; a score of 0.0 to 5.5 on the EDSS, a rating that ranges from 0 to 10, with higher  
35  
36 185 scores indicating more severe disability; MRI showing lesions consistent with MS; and at  
37  
38 186 least one documented clinical relapse either receiving or not disease modifying treatment  
39  
40 187 (DMT) within the 24 months period before beginning (enrollment) of the study. Patients were  
41  
42 188 excluded because of a recent (<30 days) relapse, prior immunosuppressant or monoclonal  
43  
44 189 antibodies therapy, pregnancy or nursing, other severe disease compromising organ function,  
45  
46 190 progressive MS, history of recent drug or alcohol abuse, use of any additional food  
47  
48 191 supplement, vitamin, or any form of PUFA, history of severe allergic or anaphylactic  
49  
50 192 reactions or known specific nutritional hypersensitivity. No monitor or limitations on  
51  
52 193 patients' daily diet habits were included in the study design since the quantities of the  
53  
54 194 ingredients within the formulas daily-dosage could not be significantly affected or spoiled by  
55  
56  
57  
58  
59  
60

1  
2  
3 195 any confounding factors within any known global daily food diet (see procedures, treatment  
4  
5 196 regimen and end-points).

6  
7 197

8  
9 198 The study was conducted in accordance with the standards of the International Conference of  
10  
11 199 Harmonization Guidelines for Good Clinical Practice. The protocol was developed by the  
12  
13 200 investigators and it was approved by the Cyprus National Bioethics Committee and was  
14  
15 201 overseen by an independent safety-monitoring committee evaluating the safety and over-all  
16  
17 202 benefit-risk profiles. The adherence of care providers with the protocol was assessed by an  
18  
19 203 external committee assigned by the funder of the project through reviews of case report  
20  
21 204 forms. All patients gave written informed consent at the time of enrolment.  
22  
23 205

24  
25 206

### 26 27 206 **Randomization and masking**

28  
29 207 Patients were randomly assigned to four intervention groups in a 1:1:1:1 ratio stratified by  
30  
31 208 gender (women to men, 3:1). Randomization was facilitated by a lottery-type pool of  
32  
33 209 numbered balls. Patients were randomly assigned to treatment in blocks of four by flipping a  
34  
35 210 coin as follows: for the first two drawn balls heads stratified them to the groups A/B and tails  
36  
37 211 stratified them to the groups C/D. The other two balls were stratified accordingly. A second  
38  
39 212 toss of the coin assigned the two patients to group A (head)/B (tail) or group C (head)/D  
40  
41 213 (tail). The randomization scheme was generated, performed and securely stored by Helix  
42  
43 214 Incubator Organization of Nicosia University (HIONU).  
44  
45 215

46  
47 216

48  
49 216 The interventions had identical appearance and smell in dark bottles (15 daily-dose  
50  
51 217 portions/bottle) under nitrogen bed and labeled by HIONU with code numbers, unidentifiable  
52  
53 218 for both patients and investigators. Study data were collected by the investigators and saved  
54  
55 219 by the HIONU that also held the blinded codes of the study. All study personnel involved in  
56  
57  
58  
59  
60



1  
2  
3 220 the conduct of the study were blinded throughout the study. Treating/examining physician,  
4  
5 221 other investigators, pharmacist, neuroradiologist and patients were masked to treatment  
6  
7 222 allocation.  
8  
9

10 223

## 11 224 **Procedures and end points**

12  
13  
14 225 The specific omega-3 (re-esterified glycerides) and omega-6 (glycerides) raw materials were  
15  
16 226 purchased according to the required interventions' PUFA-fraction specification (molecular  
17  
18 227 structure, quantity/ratio and quality) with vitamin E (alpha-tocopherol) used as antioxidant  
19  
20 228 stabilizer by the supplier. The vitamins and masking aroma were purchased separately. The  
21  
22 229 mixing of fractions to the final required intervention-composition specification was always  
23  
24 230 performed by the same team of scientists under the supervision of the involved medical  
25  
26 231 biochemist and lipidology specialist, under appropriate conditions every six months.  
27  
28 232 Interventions were stored refrigerated in dark until use. See Table 1 and Supplementary  
29  
30 233 Information Methods 1 and 2 for intervention specification detailed description and  
31  
32 234 study/intervention rational.  
33  
34  
35

36 235

37  
38 236 Participants were randomly assigned to receive: in group A, a daily dose of a 19.5ml  
39  
40 237 mixture of EPA (1,650mg) / DHA (4,650mg) / GLA (2,000mg) / LA (3,850mg) / total other  
41  
42 238 omega-3 (600mg) / total MUFA (1,714mg) + total SFA (18:0 160mg, 16:0 650mg) / vitamin  
43  
44 239 A (0.6mg) / vitamin E (22mg) plus citrus-aroma (intervention A); in group B PLP10, a daily  
45  
46 240 dose of a 19.5ml mixture of EPA (1,650mg) / DHA (4,650mg) / GLA (2,000mg) / LA  
47  
48 241 (3,850mg) / total other omega-3 (600mg) / total MUFA (1,714mg) + total SFA (18:0 160mg,  
49  
50 242 16:0 650mg) / vitamin A (0.6mg) / vitamin E (22mg) plus pure  $\gamma$ -tocopherol (760mg) plus  
51  
52 243 citrus-aroma (intervention B); in group C, a daily dose of a 19.5ml mixture of pure  $\gamma$ -  
53  
54 244 tocopherol (760mg) dispersed in pure virgin olive oil (16,137 mg) plus citrus-aroma  
55  
56  
57  
58  
59  
60

1  
2  
3 245 (intervention C) and in group D placebo, a daily dose of a 19.5ml mixture of pure virgin  
4  
5 246 olive oil (16,930mg) plus citrus-aroma (intervention D) (Table 1). The institution's  
6  
7 247 pharmacist was responsible for the appropriate storage and handling of the interventions to  
8  
9  
10 248 the individual participants. The interventions were taken orally once daily 30 minutes before  
11  
12 249 dinner by a dosage calibrated cup for 30 months. The ingredients, ratio and dose have been  
13  
14 250 selected based on their biophysical interrelation to the total known multiple MS causing  
15  
16 251 factors, their biochemical importance and the role expected to play in the normalisation and  
17  
18 252 treatment of the involved complex network of events in the disease pathophysiology.  
19  
20  
21 253 Moreover, the high intake dosage was used to overcome any abnormal dietary accumulation  
22  
23 254 of related agents as a result of patients' food intake habits, irrespective of geographical origin,  
24  
25 255 in relation to the daily consumption ratio of the total fatty acid intake; in order to end-up with  
26  
27 256 omega-3 to omega-6 PUFA indicated physiological body ratio composition of 1:1 wt/wt.  
28  
29  
30 257  
31  
32 258 The period beginning from July 1<sup>st</sup> 2007 (enrolment) until December 31<sup>st</sup> 2007 (entry  
33  
34 259 baseline) was used for normalization period. This six-month normalization period would  
35  
36 260 allow the interventions' agents to exert their beneficial effect (for the  
37  
38 261 incorporation/normalization of cell membranes by oral PUFA, since they need four to six  
39  
40 262 months to exert pivotal action on immune and neural cells, correction of antioxidant  
41  
42 263 deficiency and body PUFA, and optimal normalization of EPA and DHA levels/ratio).<sup>41-43</sup>  
43  
44  
45 264 The study was completed on December 31<sup>st</sup> 2009 and the recording of relapses continued  
46  
47 265 until December 31<sup>st</sup> 2010. More clearly the study included the "normalization period" (July  
48  
49 266 1<sup>st</sup> 2007 to Dec 31<sup>st</sup> 2007), the "on treatment" period (Jan 1<sup>st</sup> 2008 to Dec 31<sup>st</sup> 2009) and the  
50  
51 267 12-month "extended period" (Jan 1<sup>st</sup> 2010– Dec 31<sup>st</sup> 2010).  
52  
53  
54 268  
55  
56  
57  
58  
59  
60

1  
2  
3 269 Depending on their clinical status and in accordance with the ethical issues governing clinical  
4  
5 270 trials participants continued receiving the indicative regular available treatments, according to  
6  
7 271 international guidelines with persistent evaluation of any side-effects and adverse events.  
8

9  
10 272 The study was designed to end 30 months after enrolment and clinical assessments were  
11  
12 273 scheduled at entry baseline, 3, 9, 15, 21 and 24 months on-treatment. Patients were also  
13  
14 274 clinically examined by the treating neurologist within 48 hours after the onset of new or  
15  
16 275 recurrent neurologic symptoms.  
17

18  
19 276

20  
21 277 The primary end point was the ARR at two years. A relapse was defined as new or recurrent  
22  
23 278 neurologic symptoms not associated with fever or infection that lasted for at least 24 hours  
24  
25 279 and accompanied by new neurologic signs. Relapses were treated with methyl-prednisolone  
26  
27 280 at a dose of 1g intravenous per day, for three days followed by prednisone orally at a dose of  
28  
29 281 1mg/kg of weight per day on a tapering scheme for three weeks. The secondary end point at  
30  
31 282 two years was the time to confirmed disability progression, defined as an increase of 1.0 or  
32  
33 283 more on EDSS, confirmed after six months (progression could not be confirmed during a  
34  
35 284 relapse). The final EDSS score was confirmed six months after the end of the study. A post-  
36  
37 285 hoc analysis was performed assessing the proportion of patients free from new or enlarging  
38  
39 286 T2 lesions on brain MRI scans at the end of the study for the per-protocol participants of the  
40  
41 287 group receiving the highest effective intervention versus placebo. Comparison was made only  
42  
43 288 versus the available archival MRI scans up to three months before the enrolment date. MRI  
44  
45 289 scans were performed and blindly analyzed at an MRI evaluation centre. The patients  
46  
47 290 continued to be followed for additional 12 months after completion of the trial and relapses  
48  
49 291 were recorded. Finally, patients were strongly encouraged to remain in the study for follow-  
50  
51 292 up assessments even if they had discontinued the study drug.  
52  
53  
54  
55  
56 293

1  
2  
3 294 Blood samples were collected from all randomized patients at the time of enrolment, at every  
4  
5 295 scheduled clinical assessment and during relapses. To check individual compliance with  
6  
7 296 intake, the fatty acids composition of patients' red blood cells' membranes was determined,  
8  
9 297 by gas chromatography, according to a standard protocol. The fatty acid analyses were  
10  
11 298 performed after study termination and thus did not influence the blinding.  
12  
13

14 299  
15  
16 300 The involved neurologist was experienced with more than 20 years in practice and trained to  
17  
18 301 standardise EDSS scoring procedures, examined patients, made all medical decisions,  
19  
20 302 determined the EDSS score and reviewed adverse or side-effects. The medical biochemist,  
21  
22 303 specialist on lipidology and immunology and the registered clinical dietitian, members of the  
23  
24 304 investigator team were experienced with more than 25 years in practice. Patients were able to  
25  
26 305 contact the neurologist at any time if there was any adverse event, side-effect or allergic  
27  
28 306 reaction. The study drug was not suspected to have any clinical or laboratory adverse effects  
29  
30 307 different from placebo that could disturb the double-blind nature of the trial. Therefore, the  
31  
32 308 same study-neurologist functioned as both the treating and evaluating physician.  
33  
34

35 309  
36  
37  
38 310 Safety measures were assessed from the time of enrollment until 12 months following study  
39  
40 311 completion. Haematological and biochemical tests were performed at enrolment and at every  
41  
42 312 12 months, including full blood count, renal and liver function tests, proteins, cholesterol,  
43  
44 313 triglycerides, glucose and electrolytes.  
45  
46

47 314  
48  
49 315 The whole procedure followed the clinical trial guidelines as required by the USA Food and  
50  
51 316 Drug Administration, European Medicines Agency, and the Committee for Medicinal  
52  
53 317 Products for Human Use.<sup>44</sup>  
54  
55

56 318  
57  
58  
59  
60

1  
2  
3 319 **Statistical analysis**  
4

5 320 Power calculations could not be done before the study because of the lack of information  
6  
7 321 from previous studies on potential effect sizes. In 2005 the prevalence of MS in Cyprus  
8  
9 322 (600,000 population) was 120/100.000. Based on the aforementioned MS patients' numbers  
10  
11 323 of our country and the centre of reference, the CING, we were able to enrol the 20% of the  
12  
13 324 total RRMS patients eligible for treatment in the trial. Sample size was strictly based on this  
14  
15 325 subjects' availability parameter and the novelty of the assessed intervention.  
16  
17  
18  
19

20  
21 327 Baseline characteristics were compared across all intervention groups by ANOVA or  
22  
23 328 Kruskal-Wallis rank test for continuous variables and by mean Fisher's exact test for  
24  
25 329 categorical variables, as appropriate.  
26  
27

28 330  
29  
30 331 For the primary outcome, the ARR was analysed in a pair-wise fashion for the active  
31  
32 332 interventions compared to placebo using negative binomial regression models adjusted for  
33  
34 333 number of relapses within two years before baseline, EDSS score at baseline and DMT. The  
35  
36 334 relapse rate was calculated as the total number of relapses divided by the total number of  
37  
38 335 patient-years followed for each treatment group. ARR differences were also calculated  
39  
40 336 among all comparable parameters and reported as percent difference.  
41  
42

43 337  
44  
45 338 For the secondary end-point outcome, the time to disability progression, Kaplan–Meier  
46  
47 339 curves were constructed. Progression to disability and time thereof was compared in a pair-  
48  
49 340 wise fashion for the active interventions versus placebo by the log-rank test in the main  
50  
51 341 analysis and by Cox proportional-hazards models with adjustment for baseline EDSS score,  
52  
53 342 age and DMT in the supportive analysis. Each test was performed with a significance level of  
54  
55  
56  
57  
58  
59  
60

1  
2  
3 343 0.05. Multivariate models considered all variables with  $P < 0.1$  on univariate models. There  
4  
5 344 was no overt violation of the proportionality assumption.  
6  
7 345

8  
9  
10 346 Both, per-protocol and intention to treat (ITT) analyses were performed, for different sets of  
11  
12 347 research questions to be answered, and both are reported. Missing data of the five lost to  
13  
14 348 follow patients were imputed by use of the last-observation-carried-forward (LOCF)  
15  
16 349 approach. Due to the proof-of-concept design of the study, the considerable non-adherence  
17  
18 350 rate (49%) and the interpretation issues caused thereof regarding the ITT analysis, the per-  
19  
20 351 protocol analysis considered being more informative and appropriate method approach to  
21  
22 352 answer the research addressed questions of efficacy of the interventions when subjects were  
23  
24 353 continuously following the protocol. All statistical analyses were well defined a priori. All  
25  
26 354 analyses were performed with STATA SE 10.0 (College Station, TX, USA). P-values are  
27  
28 355 two-tailed.  
29  
30  
31

32 356

### 33 34 357 **Role of the funding source**

35  
36 358 The funders had no role in study design, data collection and analysis, decision to publish, or  
37  
38 359 preparation of the manuscript. All members of the writing group had full access to all study  
39  
40 360 data and contributed to its interpretation and prepared, reviewed, and approved the  
41  
42 361 manuscript for submission. All authors had final responsibility for the decision to submit the  
43  
44 362 paper for publication.  
45  
46  
47

48 363

### 49 50 364 **Results**

#### 51 52 365 **Study population**

1  
2  
3 366 From July 2007 through December 2010 (including the 12-month extended period), a total of  
4  
5 367 80 MS patients were randomly assigned to a study group at the CING (tertiary neurological  
6  
7 368 center).  
8  
9

10 369

11 370 Among the 80 patients, 20 patients were randomly assigned to each of the three groups to  
12  
13 371 receive the interventions and 20 to receive placebo (Fig 1). Baseline characteristics of both  
14  
15 372 the ITT and the per-protocol populations were similar across groups (Table 2A and 2B). All  
16  
17 373 patients that drop-out completed follow-up until study completion and were included in the  
18  
19 374 ITT analyses (Table 4). Five patients were lost to follow before their first scheduled visit and  
20  
21 375 two other patients that dropped-out before their first scheduled visit progressed to secondary  
22  
23 376 progressive MS. Fifteen patients dropped-out without successfully completing the  
24  
25 377 “normalization” period including five pregnancies. Another 17 patients dropped-out early  
26  
27 378 after entry baseline. Seven patients that dropped out were given monoclonal antibody  
28  
29 379 treatment (natalizumab). Overall, a total of 41 (51%) patients completed the 42-month study  
30  
31 380 (July 2007 through December 31<sup>st</sup> 2010, including the 12-month extended period) where one  
32  
33 381 patient from group A and two from the placebo group transferred on natalizumab, and 39  
34  
35 382 (49%) patients either withdrew (drop-out) or lost to follow. Reasons for study-interventions  
36  
37 383 discontinuation are listed in Figure 2.  
38  
39  
40  
41  
42

43 384

#### 44 385 **Efficacy**

#### 45 386 **Relapses**

46  
47 387 As a proof-of-concept trial we primarily needed to answer whether the interventions were  
48  
49 388 effective for those MS patients who adhere to the assigned treatment, the per-protocol  
50  
51 389 analysis.<sup>45</sup> For the sake of methodological comprehensiveness we also present the ITT  
52  
53 390 analysis as a secondary analysis, to answer a different question, complementary to our core  
54  
55  
56  
57  
58  
59  
60

1  
2  
3 391 hypothesis; like what happened to MS patients who were placed on the interventions (the  
4  
5 392 effect of assignment).<sup>45</sup>  
6  
7 393  
8  
9  
10 394 Regarding the per-protocol analysis, during the first year of treatment, the ARR was 0.80,  
11  
12 395 0.40, 0.78 and 0.83 for the four intervention groups respectively. During the second year, the  
13  
14 396 ARR was 0.90, 0.40, 0.67 and 1.25 for the four intervention groups respectively. Overall, for  
15  
16 397 the two-year primary end point, 8 relapses were recorded for the 10 patients in PLP10 group  
17  
18 398 (0.40 ARR) versus 25 relapses for the 12 patients in placebo (1.04 ARR), a 64% adjusted  
19  
20  
21 399 relative rate reduction (RRR) for the PLP10 group (RRR 0.36, 95% confidence interval (CI)  
22  
23 400 0.15 to 0.87, p=0.024) (Tables 3A, 5 and Fig 3A and 3C). Excluding patients on monoclonal  
24  
25 401 antibody (natalizumab) treatment, the observed adjusted RRR became stronger (72%) over  
26  
27 402 the two years (RRR 0.28, 95% CI 0.10 to 0.79, p=0.016, Tables 3B and 5). Pair-wise  
28  
29 403 comparisons for the other two groups against placebo did not yield statistically significant  
30  
31 404 results (Tables 3A, 3B). The proportion of patients with  $\leq 1$  relapse for the two years on-study  
32  
33 405 was higher in the PLP10 group than in the placebo group (90% versus 42%, p=0.030, Table  
34  
35 406 5). Seeking to investigate further the observed difference, we compared the relapse rate  
36  
37 407 during the 24 months before entry to the study to the 24 months on-treatment for each  
38  
39 408 intervention group. We observed a statistically significant relative reduction in the ARR  
40  
41 409 (70%) only in the PLP10 group (RRR 0.30; 95% CI 0.14 to 0.65, p=0.003, Table 3A);  
42  
43 410 within-group comparisons for the three other groups ARR reduction was not significant and  
44  
45 411 remained not significant when natalizumab treated patients were further excluded from the  
46  
47 412 analysis. The effect of PLP10 through time at different time-windows versus placebo for all-  
48  
49 413 time on-study patients is shown in Figures 3A to 3D. The ARR analysis, within time-  
50  
51 414 windows, was not an assigned endpoint, but it could help in the process of evaluating parallel  
52  
53 415 information as the time needed for a specific treatment intervention activity to be evident, as  
54  
55  
56  
57  
58  
59  
60



1  
2  
3 416 well as the efficacy profile through time. PLP10 reached maximum effect within a year on-  
4  
5 417 treatment (counting from the entry baseline) and remained stable at an ARR of 0.4,  
6  
7 418 displaying a steadily reduced ARR with long free-relapse time-windows. These group B  
8  
9 419 characteristics are considered important parameters of a successful MS treatment where the  
10  
11 420 rule than the exception is the heterogeneity among patients' disease evolution. Specifically,  
12  
13 421 Figure 3D demonstrates the dispersion of relapses throughout the 2-year period of all-time  
14  
15 422 on-study (excluding patients on natalizumab) of PLP10 (n=10) versus placebo (n=10).  
16  
17 423 Placebo, in line with the existing knowledge of how relapse history works in relation to future  
18  
19 424 relapses on MS patients (contagion phenomenon) indicates the expected linearly increased  
20  
21 425 trend of the relapse incidence.<sup>46</sup> The same phenomenon was true for the groups A and C.  
22  
23 426 Finally, during the 12 month post-study extended period (January 1<sup>st</sup> 2010 to December 31<sup>st</sup>  
24  
25 427 2010) all-time on-study patients that received PLP10, showed persistent benefit in the ARR  
26  
27 428 compared to placebo (six relapses for the 10 subjects within PLP10, 0.6 ARR versus 19 for  
28  
29 429 the 12 subjects within placebo group, 1.58 ARR) indicating a statistically significant 62%  
30  
31 430 adjusted relative rate reduction in the ARR for the PLP10 group (RRR 0.38, 95% CI 0.12 to  
32  
33 431 0.99, p=0.046).  
34  
35  
36  
37  
38  
39  
40  
41  
42  
43  
44  
45  
46  
47  
48  
49  
50  
51  
52  
53  
54  
55  
56  
57  
58  
59  
60

432  
433 Regarding the ITT analysis, within PLP10 group, none of the nine drop-out patients changed  
434 to natalizumab and two out of nine discontinued because of pregnancy, whereas two out of  
435 seven drop-out patients from the placebo group changed to natalizumab (a total of four  
436 patients within the placebo arm population were on natalizumab, including the two patients  
437 that transferred while all-time on-study versus none within PLP10 group (Supplementary  
438 Information Fig 1). As reported, natalizumab reduces ARR by 68%, decreases the possibility  
439 of disability progression by 43% with 57% of patients free of new or enlarging T2 lesions on  
440 MRI scans compared to 15% on placebo.<sup>47</sup> The relapses of the drop-out patients are reported

1  
2  
3 441 in Table 4A. As expected no statistically significant differences in the ARR were calculated  
4  
5 442 for the comparison of any group versus placebo for the 24 months on-treatment, with a 0.75  
6  
7 443 ARR within PLP10 (30 relapses) and 1.03 ARR within placebo (41 relapses) group, a 27%  
8  
9 444 ARR reduction (Table 4B). Interestingly, despite the high non-adherence rate, there was a  
10  
11 445 statistically significant difference for the comparison of the ARR in the 24 months before  
12  
13 446 entry baseline to the 24 months on-treatment for the PLP10 group (RRR 0.45, 95% CI 0.26 to  
14  
15 447 0.78,  $p=0.005$ ).

448

### 449 **Disability progression**

450 Regarding the per-protocol analysis, at two years, the time to disability progression, with  
451 confirmation after six months (secondary end-point) was significantly longer only with  
452 PLP10. The cumulative probability of disability progression was 10% in the PLP10 group  
453 and 58% in the placebo group ( $p=0.019$ ) (Supplementary Information Fig 2). After excluding  
454 patients on natalizumab, there was an increased statistically significant difference between  
455 the PLP10 and the placebo group for the same analysis ( $p=0.006$ ) (Fig 4A). At two years, the  
456 cumulative probability of progression was 10% in the PLP10 group and 70% in the placebo  
457 group, which represents a decrease of 60 percentage points or a relative 86% decrease in the  
458 risk of sustained progression of disability within PLP10 group (adjusted hazard ratio, 0.11;  
459 95% CI 0.01 to 0.97,  $p=0.047$ ). One versus seven out of ten patients progressed to confirmed  
460 disability in the PLP10 and the placebo groups respectively when patients on natalizumab  
461 were excluded. No statistically significant difference was observed for any comparison of the  
462 other two groups compared to placebo (Fig 4A and Supplementary Information Fig 2).

463

464 Regarding the ITT analysis, at two years, the cumulative probability of progression was 10%  
465 in the PLP10 group and 35% in the placebo group ( $p=0.052$ , a trend for an effect), which

1  
2  
3 466 represents a decrease of 25 percentage points or a relative 71% decrease of the PLP10 for the  
4  
5 467 risk of sustained progression of disability (adjusted hazard ratio 0.22, 95% CI 0.04 to 1.07,  
6  
7 468  $p=0.06$ ) (Fig 4B). Two versus seven out of the total randomized patients progressed to  
8  
9 469 confirmed disability in the PLP10 and the placebo groups respectively. No significant  
10  
11 470 differences were observed for groups A or C against placebo (Fig 4B). The mean change in  
12  
13 471 Expanded Disability Status Scale (EDSS) score as a function of visit number is shown in  
14  
15 472 Figure 5.  
16  
17  
18  
19  
20

## 21 474 **MRI**

22  
23 475 Over two years, the MRI results support the overall conclusion from the study that PLP10 has  
24  
25 476 a positive effect on disease activity since only 29% from the PLP10 group as opposed to 67%  
26  
27 477 from the placebo group developed new or enlarging T2 lesions (57% relative risk reduction).  
28  
29 478 Excluding patients on natalizumab there is an increased relative risk reduction (64%) between  
30  
31 479 PLP10 as opposed to placebo with 29% of patients on PLP10 and 80% on placebo with  
32  
33 480 development of new or enlarging T2 lesions (Table 5).  
34  
35

36 481

## 38 482 **Safety**

39  
40 483 Over the course of the 30 month study no significant adverse events were reported from any  
41  
42 484 group. According to a questioner procedure the only aetiology for drop-outs was the  
43  
44 485 palatability and smell of the formula preparations. Nausea was reported by two patients. No  
45  
46 486 abnormal values observed on any of the biochemical and haematological blood tests. No  
47  
48 487 allergic reactions reported.  
49

50 488

## 54 489 **Discussion**

1  
2  
3 490 In this proof-of-concept clinical trial assessing the safety and efficacy of three cocktail  
4  
5 491 intervention formulas in RRMS, we observed a significant benefit for the novel PLP10  
6  
7 492 intervention compared to placebo for both the ARR and the progression to disability. Our  
8  
9 493 results include analyses pertaining to a total of 42 months study collected data, including the  
10  
11 494 12-month, free of intervention treatment, extension period. We focused on the per-protocol  
12  
13 495 data analysis since it is the appropriate method to best provide the answer to the proof-of-  
14  
15 496 concept trial-addressed question. The high drop-out rate was mostly the result of formulas  
16  
17 497 palatability, a common phenomenon in trials using oily interventions where a lot of patients  
18  
19 498 tend to drop-out soon after first dosage. We thus present our main per-protocol analysis, as  
20  
21 499 well as a subgroup analysis excluding patients on natalizumab. We have found a statistically  
22  
23 500 significant reduction in the ARR and the disability progression comparing not only patients  
24  
25 501 on PLP10 versus placebo but also comparing the ARR of the PLP10 patients in the 24-month  
26  
27 502 period prior to the study to the ARR of the 24 months on-study; the observed differences  
28  
29 503 became larger when patients that received natalizumab (the most potent disease modifier)  
30  
31 504 were excluded. The ARR decreased within a year on PLP10 and significantly remained stable  
32  
33 505 until study completion. Statistically significant difference of ARR between patients on PLP10  
34  
35 506 versus placebo continued for the additional 12 month extended period (persistent effect)  
36  
37 507 without significant difference on DMT. These clinical findings are supported by the results  
38  
39 508 regarding the MRI analysis where the proportion of patients free from new or enlarging brain  
40  
41 509 T2 lesions was also higher in PLP10 group versus placebo. The persistent effect within the  
42  
43 510 extended period it is considered of major importance and supportive of the results since it is  
44  
45 511 in agreement with the very long washouts, reported necessary, for omega-3 fatty acids and  
46  
47 512 especially DHA to return towards pretreatment values within the fatty acids of plasma,  
48  
49 513 platelets, monocytes and red blood cells.<sup>42</sup> This study also provides important 30-month,

1  
2  
3 514 placebo-controlled information about the safety of PLP10, A and C interventions. No severe  
4  
5 515 side effects have been reported.  
6

7 516

8  
9 517 As medications used to treat MS become increasingly highly specific and potent, attention to  
10  
11 518 safety is paramount. Current available treatments are products of reductionism, partially  
12  
13 519 effective, associated with severe side effects without (re)myelinating or neuroprotective  
14  
15 520 abilities. Interferons and glatiramer acetate, the most widely used first-line MS drugs  
16  
17 521 available today, are associated with the least severe side-effects among MS therapies but they  
18  
19 522 are reported with only 29-33% ARR reduction and with no significant effects on the  
20  
21 523 progression of disability. Natalizumab as previously discussed and Fingolimod with 54%  
22  
23 524 ARR reduction (without significant benefit on the progression of disability) are second-line  
24  
25 525 drugs associated with severe side-effects.<sup>47, 48</sup>  
26  
27  
28  
29

30 526

31  
32 527 No existing MS treatment has ever been designed as a result of SM concept approach or with  
33  
34 528 a potential to effectively stimulate intrinsic remyelinating and neuroprotecting mechanisms or  
35  
36 529 exert such an action. Now we propose that a holistic SM model approach has to be applied by  
37  
38 530 synchronized action on all involved perturbed mechanisms. PLP10 has innovative  
39  
40 531 characteristics with a postulated efficacy attained through different mechanisms of action and  
41  
42 532 probably by the synergistic effect of its constituent ingredients. PLP10 has all the  
43  
44 533 characteristics of a medical food with the action to feed a normal metabolic process by  
45  
46 534 supplying nutritional structural membrane precursors, building blocks, and vitamins from  
47  
48 535 dietary sources that enhance remyelination and neuroprotection and simultaneously promote  
49  
50 536 normalization of all cellular membranes lipid content. The intention is to normalize the  
51  
52 537 specific nutritional requirements of the MS patients.  
53  
54  
55

56 538  
57  
58  
59  
60

1  
2  
3 539 Different factors and molecular entities appear to be part of the possible aetiology for MS  
4  
5 540 with specific PUFA and antioxidants found to be key substances related to all known  
6  
7 541 pathogenic and recovery mechanisms. But, it is well established that MS patients are  
8  
9 542 characterized with significant deficiencies in antioxidant efficiency as well as in PUFA levels  
10  
11 543 in blood and cellular membranes.<sup>11, 49-51</sup>  
12  
13

14 544  
15  
16 545 According to one hypothesis, the change in the ratio of omega-3 to omega-6, due to  
17  
18 546 increasing consumption of omega-6 PUFA, meaning high accumulation of AA, in the  
19  
20 547 Western diet, may be one of the major factors responsible for the increasing incidence of  
21  
22 548 inflammatory diseases relative to populations. In the Western diet, the ratio of omega-3 to  
23  
24 549 omega-6 is about 1:20–30; in populations that consume fish-based diets, the ratio is about  
25  
26 550 1:1–2.<sup>52, 53</sup> The intervention daily dose was aiming and believed to be high enough to  
27  
28 551 restore/amplify body efficient antioxidant activity and ensure cellular membranes lipid profile  
29  
30 552 normalization (PUFA content) and simultaneously potentiate involvement of the ingredients  
31  
32 553 in the anti-inflammatory and recovery mechanisms. Diet fatty acid molecules need about six  
33  
34 554 months period to exert their beneficial effect and this essential parameter was for the first  
35  
36 555 time under consideration in our study design (normalization period).<sup>42</sup> This chronotherapy  
37  
38 556 parameter it is of major importance in line with the SM treatment philosophy and if it is not  
39  
40 557 included in the trial design the possibility of misleading result evaluation greatly increases. In  
41  
42 558 fact, considering that omega-3 supplementation can release and replace excess AA within the  
43  
44 559 cellular membranes, we can speculate that an increased inflammatory activity can possibly  
45  
46 560 result during the first six months of supplementation (during normalization period).  
47  
48  
49  
50  
51

52 561  
53  
54 562 The maintenance of myelin requires continued turnover of its components throughout life.<sup>54,55</sup>  
55  
56 563 In addition to the EPA, DHA, LA, and GLA, PLP10 was containing limited quantities of  
57  
58  
59  
60

1  
2  
3 564 other structural PUFA, specific MUFA (mostly oleic acid) and SFA (palmitic and stearic  
4  
5 565 acid), specifically to provide a direct source for neuronal cell membranes rehabilitation and  
6  
7 566 for (re)myelination and neuroprotection since they are all major components, precursors and  
8  
9  
10 567 building blocks of any new physiological myelin and cellular membranes in general.  
11  
12 568 Assembly of the correct molecules into myelin membrane may be especially critical during  
13  
14 569 active synthesis. Possibly, if critical constituents aren't available or are metabolically  
15  
16 570 blocked, amyelination, dysmyelination or demyelination may ensue.<sup>56</sup>  
17  
18  
19 571

20  
21 572 The well known and established safety of the ingredients used and the protocol guidelines  
22  
23 573 were supportive reasons for us to proceed with the clinical study even though with limitation  
24  
25 574 on the pre-estimation of required trial sample size as it was discussed in method section. The  
26  
27 575 adherence of the subjects is another issue but the duration of the study (42 months) is adding  
28  
29 576 power to the results;<sup>44</sup> having the research questions been consciously and carefully  
30  
31 577 approached and answered. Furthermore, the statistical methodologies used along with the  
32  
33 578 appropriate adjustments, broadly accepted for MS clinical trials, power the findings, results,  
34  
35 579 and significance. The baseline characteristics of the treatment arms could possibly be  
36  
37 580 considered indicative of four very active groups of patients but that was the result of the  
38  
39 581 limited number of RRMS population eligible for the study within Cyprus. On the other hand  
40  
41 582 the balanced baseline characteristics without statistical differences, the statistical adjustments  
42  
43 583 (for all important baseline parameters i.e. relapses, EDSS, age and DMT) and the  
44  
45 584 randomization within four different groups are the safety valves against data  
46  
47 585 misinterpretation. Yet, in small randomized control trials with a high drop-out rate, the per-  
48  
49 586 protocol analysis could be affected by the characteristics of the patients dropping out. In  
50  
51 587 order to safeguard our findings in the best possible way under the circumstances, we  
52  
53 588 proceeded to adjusting for confounders. Moreover, we cannot discard our finding as a false  
54  
55  
56  
57  
58  
59  
60

1  
2  
3 589 positive, given that this is a randomized, double-blind, placebo-controlled clinical trial and,  
4  
5 590 despite its small sample size, represents a piece of evidence that only a larger randomized  
6  
7 591 controlled trial can replicate or refute. It is possible to question why DMTs efficacy cannot  
8  
9 592 be emerged out of the data analysis, of the four treatment arms, and in accordance to their  
10  
11 593 published values. We believe that the limited efficacy of the DMTs, the sample size and the  
12  
13 594 statistical adjustments were strong limiting determining factors for such an indication to be  
14  
15 595 countable. An additional argument is that the efficacy reported for the analysis of pre-  
16  
17 596 treatment (24 months before entry baseline) versus on-trial ARR could be considered as  
18  
19 597 potentially biased due to differences of how relapses were defined during the course of a  
20  
21 598 study compared to pre-treatment period; or due to regression to the mean or placebo effect.  
22  
23 599 This analysis was performed as an additional exploratory analysis that we were able to do due  
24  
25 600 to the availability of data. The relapses of the two pre-treatment years were drawn out of the  
26  
27 601 patients' archival records by the same treating neurologist involved in the study (MP), and  
28  
29 602 according to the patients' hospitalization date for receiving intravenous methyl-prednisolone.  
30  
31 603 This analysis was not used as a primary or a secondary end-point under investigation  
32  
33 604 although it is usually reported by many clinical studies. As a matter of fact many early phase  
34  
35 605 trials are based only on such an analysis (before versus after treatment results). In almost all  
36  
37 606 MS trials the number of relapses within the two years before baseline is a factor under  
38  
39 607 adjustment for the statistical analyses.<sup>48</sup> The inclusion of the post-hoc MRI analysis is another  
40  
41 608 limiting factor that needs attention since it was used as an additional aside exploratory  
42  
43 609 approach (due to study budget limitations it was not possible to be used as a formal  
44  
45 610 endpoint); but the MRI evaluation was blinded and can be considered as representative of the  
46  
47 611 randomized subjects within the treatment arms. As far as the regression to the mean and the  
48  
49 612 placebo effect concerns we believe that the 6-month normalization period is an accountable  
50  
51 613 and valuable eliminating factor of the possible effect; as well as the presence of four groups,  
52  
53  
54  
55  
56  
57  
58  
59  
60



1  
2  
3 614 where only the PLP10 treatment arm is associated with statistically significant efficacy versus  
4  
5 615 placebo.

6  
7 616

8  
9  
10 617 Our observations are consistent with the idea that simultaneous availability of specific PUFA  
11  
12 618 along with other major membrane and myelin building blocks in combination with specific  
13  
14 619 antioxidants, within optimum quantity, quality, ratio and structural form can possibly result to  
15  
16 620 a more appropriate holistic therapy reducing MS disease activity. This is probably succeeded  
17  
18 621 through synergistic and/or simultaneous effect on the interactions and dynamics of the most  
19  
20 622 probable environmental and biological disease causing factors that induce complex biological  
21  
22 623 network of events for disease pathogenesis and evolution; as well as on the protective and  
23  
24 624 reparative mechanisms. We can additionally speculate that the nature of the intervention  
25  
26 625 formula cannot be prohibitive for its use as preventive regimen and does not preclude  
27  
28 626 probable positive efficacy on the other types of MS, but has to be further investigated. A  
29  
30 627 larger size multicenter clinical trial will better establish PLP10 place in the armamentarium of  
31  
32 628 treatments for MS.

33  
34  
35  
36 629

37  
38 630 It is commonly accepted that nutrition is one of the possible environmental factors involved  
39  
40 631 in the pathogenesis of MS, but its role as complementary MS treatment is unclear and largely  
41  
42 632 disregarded.<sup>57</sup> It is well known that the majority of the patients suffering from MS they do  
43  
44 633 use dietary supplements for a variable length of time and they prefer supplement type of  
45  
46 634 “help” over conventional drugs.<sup>58</sup> Dietary antioxidants and fatty acids may influence the  
47  
48 635 disease process in MS by reducing immune-mediated inflammation, oxidative stress and  
49  
50 636 excitotoxic damage.<sup>11</sup> Present data reveal that healthy dietary molecules have a pleiotropic  
51  
52 637 role and are able to change cell metabolism from anabolism to catabolism and down-regulate  
53  
54 638 inflammation by interacting with enzymes, nuclear receptors and transcriptional factors.<sup>57</sup>

1  
2  
3 639 The present preliminary small size randomized controlled phase II clinical trial, for the first  
4  
5 640 time provides link evidence between dietary, metabolic, immunological, and neurobiological  
6  
7 641 aspects of MS after three quarters of a century of unsuccessful scientific efforts. This link  
8  
9 642 evidence might probably be the beginning of opening new horizons and new avenues in the  
10  
11 643 approach of MS prevention and treatment, and possibly of other multifactorial chronic  
12  
13 644 diseases, including neurodegenerative and autoimmune as well.  
14  
15  
16  
17  
18  
19  
20  
21  
22  
23  
24  
25  
26  
27  
28  
29  
30  
31  
32  
33  
34  
35  
36  
37  
38  
39  
40  
41  
42  
43  
44  
45  
46  
47  
48  
49  
50  
51  
52  
53  
54  
55  
56  
57  
58  
59  
60

1.  
Treatment Arms

| A†                                                                                                                                                                                                                                         | B (PLP10)†                                                                                                                                                                                                                                                                     | C†                                                                                                                                             | Placebo†                                                          |
|--------------------------------------------------------------------------------------------------------------------------------------------------------------------------------------------------------------------------------------------|--------------------------------------------------------------------------------------------------------------------------------------------------------------------------------------------------------------------------------------------------------------------------------|------------------------------------------------------------------------------------------------------------------------------------------------|-------------------------------------------------------------------|
| <b>Intervention:</b><br>EPA (1,650mg) / DHA (4,650mg) / GLA (2,000mg) / LA (3,850mg) / total other omega-3 (600mg)* / total MUFA** (1,714mg) + total SFA (18:0 160mg, 16:0 650mg) / vitamin A (0.6mg) / vitamin E (22mg) plus citrus aroma | <b>Intervention:</b><br>EPA (1,650mg) / DHA (4,650mg) / GLA (2,000mg) / LA (3,850mg) / total other omega-3 (600mg)* / total MUFA** (1,714mg) + total SFA (18:0 160mg, 16:0 650mg) / vitamin A (0.6mg) / vitamin E (22mg) + pure $\gamma$ -tocopherol (760mg) plus citrus aroma | <b>Intervention:</b><br>pure $\gamma$ -tocopherol (760mg) dispersed in pure virgin olive oil (16,137 mg) as delivery vehicle plus citrus aroma | <b>Intervention:</b><br>Olive oil (pure virgin) plus citrus aroma |

\* Other omega-3: C18:3n-3 37mg, C18:4n-3 73mg, C20:4n-3 98mg, C22:5n-3 392mg  
 \*\* MUFA: 18:1 1300mg, 20:1 250mg, 22:1 82mg, 24:1 82mg  
 † Total daily dose 19.5ml

EPAX1050, EPAX AS, Aalesund, Norway; was used as the source for the omega-3 PUFA, as re-esterified glycerides from fish body oils; Borage seed oil (organic, cold pressed) “Borago officinalis” Goerlich Pharma International GmbH, Edling, Germany, was used as the source for the omega-6 PUFA, MUFA and SFA, as triglycerides. The pure  $\gamma$ -tocopherol was purchased from Tama Biochemical Co. Ltd., Shinjuku-ku Tokyo, Japan; vitamin A as beta-carotene from HealthAid Ltd., Middlesex, United Kingdom and the Citrus aroma from Givaudan Schwaiz AG, Dubendorf, Switzerland.

**Table 1.** Intervention ingredients per treatment arm.

664  
665  
666  
667  
668  
669  
670  
671  
672  
673  
674

| <b>2A.</b>                                 |                   |                    |                   |                   |              |
|--------------------------------------------|-------------------|--------------------|-------------------|-------------------|--------------|
| Characteristics                            | Group A<br>(n=20) | Group B†<br>(n=20) | Group C<br>(n=20) | Placebo<br>(n=20) | P-<br>value  |
| <b>Sex</b>                                 |                   |                    |                   |                   |              |
| Female - no. (%)                           | 15 (75)           | 15 (75)            | 15 (75)           | 15 (75)           | <b>1.000</b> |
| <b>Age (yr)</b>                            |                   |                    |                   |                   |              |
| Mean ± Standard Deviation (SD)             | <b>38.0±11.9</b>  | <b>36.9±8.4</b>    | <b>37.7±8.7</b>   | <b>38.1±10.9</b>  | <b>0.982</b> |
| Median (Range)                             | 38.0 (22–65)      | 37.0 (25–61)       | 36.5 (24–54)      | 36.0 (21–58)      |              |
| <b>Treatment history</b>                   |                   |                    |                   |                   |              |
| Patients on DMT- no. (%)                   | 11 (55)           | 9 (45)             | 12 (60)           | 10 (50)           | <b>0.875</b> |
| <b>Pre-treatment disease duration (yr)</b> |                   |                    |                   |                   |              |
| Mean ± SD                                  | <b>9.0±7.6</b>    | <b>8.6±4.8</b>     | <b>8.6±5.3</b>    | <b>7.7±5.7</b>    | <b>0.909</b> |
| Median (Range)                             | 7.5 (2–37)        | 8.0 (2–20)         | 8.0 (3–24)        | 6.5 (2–25)        |              |
| <b>Pre-treatment relapses‡</b>             |                   |                    |                   |                   |              |
| Mean ± SD                                  | <b>2.33±1.68</b>  | <b>2.41±1.73</b>   | <b>2.31±1.66</b>  | <b>2.10±1.32</b>  | <b>0.946</b> |
| Median (Range)                             | 2.0 (1–6)         | 2.0 (1–7)          | 2.0 (1–6)         | 2.0 (1–4)         |              |
| ARR                                        | <b>1.17</b>       | <b>1.21</b>        | <b>1.16</b>       | <b>1.05</b>       | <b>0.946</b> |
| Patients -% with ≤1 relapse                | 40                | 45                 | 40                | 35                |              |
| <b>Baseline EDSS score‡</b>                |                   |                    |                   |                   |              |
| Mean ± SD                                  | <b>2.52±1.23</b>  | <b>2.15±1.05</b>   | <b>2.42±1.21</b>  | <b>2.39± 0.93</b> | <b>0.775</b> |
| Median (Range)                             | 2.5 (1.0–5.5)     | 2.0 (1.0–4.0)      | 2.5 (0.0–5.0)     | 2.5 (1.0–4.0)     |              |
| <b>2B.</b>                                 |                   |                    |                   |                   |              |
| Characteristics                            | Group A<br>(n=10) | Group B†<br>(n=10) | Group C<br>(n=9)  | Placebo<br>(n=12) | P-<br>value  |
| <b>Sex</b>                                 |                   |                    |                   |                   |              |
| Female - no. (%)                           | 5 (50)            | 7 (70)             | 6 (66.6)          | 10 (83.3)         | <b>0.419</b> |
| <b>Age (yr)</b>                            |                   |                    |                   |                   |              |
| Mean ± SD                                  | <b>36.6±13.5</b>  | <b>34.80±5.4</b>   | <b>40.9±8.1</b>   | <b>39.8±13.2</b>  | <b>0.572</b> |
| Median (Range)                             | 34.5 (22–65)      | 34.5 (26–43)       | 40.0 (29–54)      | 37.5 (21–58)      |              |
| <b>Treatment history</b>                   |                   |                    |                   |                   |              |
| Patients on DMT- no. (%)                   | 6 (60)            | 4 (40)             | 6 (67)            | 6 (50)            | <b>0.949</b> |
| <b>Pre-treatment disease duration (yr)</b> |                   |                    |                   |                   |              |
| Mean ± SD                                  | <b>9.7±10.0</b>   | <b>8.3±5.3</b>     | <b>11.3±6.1</b>   | <b>8.7± 7.1</b>   | <b>0.807</b> |
| Median (Range)                             | 7.5 (2–37)        | 8.0 (2–20)         | 8.0 (4–24)        | 5.5 (2–25)        |              |
| <b>Pre-treatment relapses</b>              |                   |                    |                   |                   |              |

|                             |               |               |               |               |       |
|-----------------------------|---------------|---------------|---------------|---------------|-------|
| Mean ± SD                   | 2.20±1.47     | 2.70±1.25     | 1.78±0.66     | 1.67±1.37     | 0.241 |
| Median (Range)              | 2.0 (1 – 6)   | 2.5 (1 – 4)   | 2.0 (1 – 3)   | 1.5 (1 – 4)   |       |
| ARR                         | 1.10          | 1.35          | 0.89          | 0.83          |       |
| Patients -% with ≤1 relapse | 30            | 20            | 33            | 50            |       |
| <b>Baseline EDSS score</b>  |               |               |               |               |       |
| Mean ± SD                   | 2.65±1.37     | 2.40±1.12     | 2.11±1.02     | 2.16±0.96     | 0.698 |
| Median (Range)              | 3.0 (1.0–5.5) | 2.5 (1.0–4.0) | 2.0 (1.0–4.0) | 2.0 (1.0–3.5) |       |

† PLP10 group

‡ Available data at Entry Baseline (n=18 for group A, n=17 for group B, n=19 for group C, n=19 for group D)

**Table 2.** The table section 2A reports the demographics and baseline disease characteristics for total randomized population by treatment arm.

The table section 2B reports the demographics and baseline disease characteristics of all-time on-study population by treatment arm. There were no significant between study-group differences at baseline for any characteristic.

675

676

677

678

679

680

681

682

683

684

685

686

687

688

| <b>3A.</b>                                                                                                                                                                                                    |                   |             |                    |             |                  |             |                   |             |
|---------------------------------------------------------------------------------------------------------------------------------------------------------------------------------------------------------------|-------------------|-------------|--------------------|-------------|------------------|-------------|-------------------|-------------|
| Characteristics                                                                                                                                                                                               | Group A<br>(N=10) |             | Group B†<br>(N=10) |             | Group C<br>(N=9) |             | Placebo<br>(N=12) |             |
| End Point                                                                                                                                                                                                     | X                 | Y           | X                  | Y           | X                | Y           | X                 | Y           |
| Total No. of relapses                                                                                                                                                                                         | 22                | 17          | 27                 | 8           | 16               | 13          | 20                | 25          |
| <b>Annual Relapse Rate (ARR)</b>                                                                                                                                                                              | <b>1.10</b>       | <b>0.85</b> | <b>1.35</b>        | <b>0.40</b> | <b>0.88</b>      | <b>0.72</b> | <b>0.83</b>       | <b>1.04</b> |
| <b>% Reduction Compared to Placebo (primary endpoint) (Ys)¶</b>                                                                                                                                               | <b>-18</b>        |             | <b>-62</b>         |             | <b>-30</b>       |             | <b>N/A</b>        |             |
| <b>P Value against placebo</b>                                                                                                                                                                                | <b>0.468</b>      |             | <b>0.024</b>       |             | <b>0.578</b>     |             |                   |             |
| <b>ARR change -% (Y to X)¶</b>                                                                                                                                                                                | <b>-23</b>        |             | <b>-70</b>         |             | <b>-18</b>       |             | <b>+25</b>        |             |
| <b>P value against baseline</b>                                                                                                                                                                               | <b>0.425</b>      |             | <b>0.003</b>       |             | <b>0.578</b>     |             | <b>0.500</b>      |             |
| X: Total number of relapses of 24 months pre-treatment (baseline)<br>Y: Total number of relapses of 24 months on-treatment<br>¶ Unadjusted estimate                                                           |                   |             |                    |             |                  |             |                   |             |
| <b>3B.</b>                                                                                                                                                                                                    |                   |             |                    |             |                  |             |                   |             |
| <b>Excluding patients on natalizumab</b>                                                                                                                                                                      | Group A<br>(N=9)  |             | Group B†<br>(N=10) |             | Group C<br>(N=9) |             | Placebo<br>(N=10) |             |
| End Point                                                                                                                                                                                                     | X                 | Y           | X                  | Y           | X                | Y           | X                 | Y           |
| Total No. of relapses                                                                                                                                                                                         | 16                | 15          | 27                 | 8           | 16               | 13          | 13                | 19          |
| <b>Annual Relapse Rate (ARR)</b>                                                                                                                                                                              | <b>0.88</b>       | <b>0.83</b> | <b>1.35</b>        | <b>0.40</b> | <b>0.88</b>      | <b>0.72</b> | <b>0.65</b>       | <b>0.95</b> |
| <b>% Reduction Compared to Placebo (primary endpoint) (Ys)¶</b>                                                                                                                                               | <b>-13</b>        |             | <b>-58</b>         |             | <b>-24</b>       |             | <b>N/A</b>        |             |
| <b>P Value against placebo</b>                                                                                                                                                                                | <b>0.493</b>      |             | <b>0.016</b>       |             | <b>0.412</b>     |             |                   |             |
| <b>ARR change -% (Y to X)¶</b>                                                                                                                                                                                | <b>-6</b>         |             | <b>-70</b>         |             | <b>-18</b>       |             | <b>+46</b>        |             |
| <b>P value against baseline</b>                                                                                                                                                                               | <b>0.857</b>      |             | <b>0.003</b>       |             | <b>0.578</b>     |             | <b>0.354</b>      |             |
| X: Total number of relapses of 24 months pre-treatment (baseline)<br>Y: Total number of relapses of 24 months on-treatment<br>† PLP10 group<br>¶ Unadjusted estimate                                          |                   |             |                    |             |                  |             |                   |             |
| <b>Table 3.</b> The table section 3A reports the two year primary end points of ARR of all-time on-study population by treatment arm and percent difference with placebo. During the 24mo period on-treatment |                   |             |                    |             |                  |             |                   |             |

1  
2  
3 the ARR of the group A was 0.85 with 18% decrease compared to placebo (p=0.468), of PLP10 group  
4 0.40 with 62% decrease (p=0.024), and of group C 0.72 with 30% decrease (p=0.578) and reports the  
5 comparison of the 24mo pre-treatment ARR (baseline ARR) to 24mo on-treatment ARR of all-time on-  
6 study population including patients on natalizumab.  
7  
8  
9  
10

11  
12  
13  
14 The table section 3B reports comparison of the 24mo pre-treatment ARR to 24mo on-treatment ARR of  
15 all-time on-study population excluding patients on natalizumab; and the comparison of the ARR during  
16 the 24mo period on-treatment (primary end point) between each one of the groups against placebo.  
17  
18  
19  
20

21 689

22 690

23 691

24 692

25 693

26 694

27 695

28 696

29 697

30 698

31 699

32 700

33 701

34 702

35 703

36 704

37 705

38 706

39

40

41

42

| <b>4A.</b>                                                                                                                                                           |                   |             |                    |             |                   |             |                   |             |  |
|----------------------------------------------------------------------------------------------------------------------------------------------------------------------|-------------------|-------------|--------------------|-------------|-------------------|-------------|-------------------|-------------|--|
| Characteristics                                                                                                                                                      | Group A<br>(N=8)  |             | Group B†<br>(N=7)  |             | Group C<br>(N=10) |             | Placebo<br>(N=7)  |             |  |
|                                                                                                                                                                      | X                 | Y           | X                  | Y           | X                 | Y           | X                 | Y           |  |
| No. of Relapses                                                                                                                                                      | 20                | 14          | 14                 | 14          | 27                | 26          | 20                | 13          |  |
| <b>Annual Relapse Rate (ARR)</b>                                                                                                                                     | <b>1.25</b>       | <b>0.88</b> | <b>1.00</b>        | <b>1.00</b> | <b>1.35</b>       | <b>1.30</b> | <b>1.42</b>       | <b>0.92</b> |  |
| X: Total number of relapses of 24 months pre-treatment<br>Y: Total number of relapses of 24 months on-treatment                                                      |                   |             |                    |             |                   |             |                   |             |  |
| <b>4B.</b>                                                                                                                                                           |                   |             |                    |             |                   |             |                   |             |  |
| Characteristics                                                                                                                                                      | Group A<br>(N=20) |             | Group B†<br>(N=20) |             | Group C<br>(N=20) |             | Placebo<br>(N=20) |             |  |
| End Point                                                                                                                                                            | X                 | Y           | X                  | Y           | X                 | Y           | X                 | Y           |  |
| No. of Relapses                                                                                                                                                      | 45                | 34          | 49                 | 30          | 46                | 41          | 43                | 41          |  |
| <b>Annual Relapse Rate (ARR)</b>                                                                                                                                     | <b>1.13</b>       | <b>0.85</b> | <b>1.23</b>        | <b>0.75</b> | <b>1.15</b>       | <b>1.03</b> | <b>1.08</b>       | <b>1.03</b> |  |
| ARR Reduction -% (Y to X)¶                                                                                                                                           | -25               |             | -39                |             | -10               |             | -5                |             |  |
| <b>P value against baseline</b>                                                                                                                                      | <b>0.120</b>      |             | <b>0.005</b>       |             | <b>0.475</b>      |             | <b>0.652</b>      |             |  |
| <b>% Reduction of the ARR Compared to Placebo (Ys)¶</b>                                                                                                              | <b>-18</b>        |             | <b>-27</b>         |             | <b>0.0</b>        |             | <b>N/A</b>        |             |  |
| <b>P Value against placebo</b>                                                                                                                                       | <b>0.447</b>      |             | <b>0.121</b>       |             | <b>0.996</b>      |             |                   |             |  |
| X: Total number of relapses of 24 months pre-treatment (baseline)<br>Y: Total number of relapses of 24 months on-treatment<br>¶ Unadjusted estimate<br>† PLP10 group |                   |             |                    |             |                   |             |                   |             |  |

**Table 4.** The table section 4A reports the two year primary end point of relapses based on study design as reported by drop-out patients by Treatment Arm. The most drop-out patients that went on disease modified therapy (DMT) were from the group A and placebo with three and two patients respectively on natalizumab. These parameters justify the decreased number of relapses recorded within group A and placebo drop-outs; and this could affect the ITT analysis in favor of placebo when the total two-year recorded data are used. For PLP10 group, 14 relapses were reported at baseline and remained the same during the two-year study. For placebo, 20 relapses were reported at baseline and decreased to 13 during the two-



1  
2  
3 year study. This is expected since, for PLP10 group 43% of the drop-outs were under DMT at  
4 entry baseline and remained the same until the end of the study with no patient on  
5 natalizumab; but 57% of the placebo group drop-outs that were under DMT at entry baseline  
6 increased to 86% at the end of the study including two patients on natalizumab.  
7  
8  
9  
10

11  
12  
13  
14 The table section 4B reports comparison of 24 months pre-treatment ARR (baseline) to 24  
15 months on-treatment ARR of total randomized population, by treatment arm. The ARR of  
16 PLP10 group was 1.23 at baseline and 0.75 at the end of the study (39% reduction  $p=0.005$ ),  
17 and for placebo 1.08 at baseline and 1.03 at the end of the study (5% reduction  $p=0.652$ ). No  
18 statistical difference was calculated for the other two treatment arms. During the 24 months  
19 on-treatment, PLP10 group presented a 27% reduction of ARR versus placebo ( $p=0.121$ ),  
20 with all groups without statistically significant results.  
21  
22  
23  
24  
25  
26  
27  
28  
29

707

708

709

710

711

712

713

714

715

| <b>5.</b>                                                                                                            |                   |                            |                  |                    |                                      |
|----------------------------------------------------------------------------------------------------------------------|-------------------|----------------------------|------------------|--------------------|--------------------------------------|
| Characteristics*                                                                                                     | Group A<br>(n=10) | Group B<br>PLP10<br>(n=10) | Group C<br>(n=9) | Placebo<br>(n=12)  | P-value<br>Group<br>B vs.<br>Placebo |
| Annual relapse rate over 1 year**                                                                                    | <b>0.80</b>       | <b>0.40</b>                | <b>0.78</b>      | <b>0.83</b>        |                                      |
| Total number of relapses**                                                                                           | 8                 | 4                          | 7                | 10                 |                                      |
| <b>Primary end points</b>                                                                                            |                   |                            |                  |                    |                                      |
| Annual relapse rate over 2 years (95% CI)**                                                                          | 0.85              | <b>0.40 (0.15-0.87)</b>    | 0.72             | <b>1.04</b>        | <b>0.024</b>                         |
| Total number of relapses**                                                                                           | 17                | 8                          | 13               | 25                 |                                      |
| <b>Excluding patients on natalizumab</b>                                                                             |                   |                            |                  |                    |                                      |
| Annual relapse rate over 2 years (95% CI)                                                                            | 0.83              | <b>0.40 (0.10-0.79)</b>    | 0.72             | <b>0.95</b>        | <b>0.016</b>                         |
| Total number of relapses                                                                                             | 15                | <b>8</b>                   | 13               | <b>19</b>          |                                      |
| <b>Secondary end points</b>                                                                                          |                   |                            |                  |                    |                                      |
| Cumulative probability of sustained progression increase by 1 point on EDSS confirmed after 6 mo, over 2 years -% ** | 43                | <b>10 (1/10)</b>           | 24               | <b>58 (7/12)</b>   | <b>0.019</b>                         |
| <b>Excluding patients on natalizumab</b>                                                                             |                   |                            |                  |                    |                                      |
| cumulative probability of sustained progression increase by 1 point on EDSS confirmed after 6 mo, over 2 years -%    | 33                | <b>10 (1/10)</b>           | 24               | <b>70 (7/10)</b>   | <b>0.006</b>                         |
| <b>Exploratory Results</b>                                                                                           |                   |                            |                  |                    |                                      |
| Patients proportion with ≤1 relapse over 2 years -% **                                                               | 50 (5/10)         | <b>90 (9/10)</b>           | 56 (5/9)         | <b>42 (5/12)</b>   | <b>0.030</b>                         |
| <b>MRI</b>                                                                                                           |                   |                            |                  |                    |                                      |
| Patients proportion with new or enlarging T2 lesions-% **                                                            | ----              | <b>29 (2/7)</b>            | ----             | <b>67 (4/6)</b>    |                                      |
| <b>Excluding patients on natalizumab</b>                                                                             |                   |                            |                  |                    |                                      |
| Patients proportion with no new or enlarging T2 lesions-%                                                            | ----              | <b>29 (2/7)</b>            | ----             | <b>80 (4/5)</b>    |                                      |
| <b>DMT (interferons, glatiramer acetate) and natalizumab</b>                                                         |                   |                            |                  |                    |                                      |
| Patients proportion on DMT and natalizumab at the end of 2 years-% **                                                | 80 (8/10)†        | <b>60 (6/10)</b>           | 67 (6/9)         | <b>75 (9/12) ‡</b> | <b>0.747</b>                         |
| * CI denotes confidence interval.                                                                                    |                   |                            |                  |                    |                                      |
| ** Including patients on natalizumab                                                                                 |                   |                            |                  |                    |                                      |
| † 1 out of 10 on natalizumab                                                                                         |                   |                            |                  |                    |                                      |
| ‡ 2 out of 12 on natalizumab                                                                                         |                   |                            |                  |                    |                                      |

**Table 5.** Clinical end points, according to study group for all-time on-study population.

716

1  
2  
3 717 Acknowledgments: We thank all participant patients. We thank Thyrsos Posporis MD and the  
4  
5 718 central reading centre (Ayios Therissos Medical Diagnostic Centre, Nicosia, Cyprus), and  
6  
7 719 Eleni Eracleous, MD (neuroradiologist) for the contribution on the MRI scans and their team  
8  
9 720 for the MRI reading. Special thanks to Elena Kkolou the pharmacist involved in the study and  
10  
11 721 Eftychia Gaglia for her nursing contribution and collection of blood from the patients. We  
12  
13 722 also thank Demetris Hadjisofoklis and Ioanna Leontiou (University of Nicosia, Helix  
14  
15 723 Business incubator) for their contribution on randomization process, data collection, filing  
16  
17 724 and blind codes keeping. Additionally we would like to thank the CING for hosting the  
18  
19 725 project. Moreover, we thank the Cyprus Ministry of Commerce, Industry and Tourism for  
20  
21 726 funding the project; and Yasoo Health Ltd., for providing some of the raw materials in  
22  
23 727 exchange of investigating, on their behalf, the efficacy and safety of  $\gamma$ -tocopherol.  
24  
25  
26  
27  
28

29 729 Contributors: All authors interpreted the data. I.S.P drafted the report and figures and all  
30  
31 730 authors critically revised and approved the final version. M.C.P and I.S.P were responsible  
32  
33 731 for the protocol and study design. M.C.P was the evaluator of patients' clinical progress signs  
34  
35 732 and the treatment physician. I.S.P and G.N.L were involved in the non-pharmacologic  
36  
37 733 treatment-related care. I.S.P performed the literature search and both I.S.P and G.N.L  
38  
39 734 contributed on the intervention formulation and composition rational. I.S.P supervised the  
40  
41 735 composition procedure of the interventions and the fatty acid profile analysis of the red blood  
42  
43 736 cell membranes. E.E.N and I.S.P performed the statistical analyses. E.E.N was an  
44  
45 737 independent scientist. All authors vouch for the accuracy and completeness of the data and  
46  
47 738 the statistical analyses.  
48  
49  
50  
51  
52  
53  
54  
55  
56  
57  
58  
59  
60

1  
2  
3 740 Funding: Supported by a grand from the Cyprus Ministry of Commerce, Industry and  
4  
5 741 Tourism, program for the creation of new high technology and innovation enterprises through  
6  
7 742 the business incubator.  
8

9  
10 743

11 744 Competing interest: M.C.P, G.N.L, I.S.P received grand support from the Cyprus Ministry of  
12  
13 745 Commerce, Industry and Tourism, Program for the Creation of New High Technology and  
14  
15 746 Innovation Enterprises through the Business Incubator. PALUPA Medical Ltd. is a research  
16  
17 747 company formed and registered for completion of the study, as required by the Governments'  
18  
19 748 funding grand program. M.C.P, G.N.L, I.S.P, and CING are all stockholders of the PALUPA  
20  
21 749 Medical Ltd. M.C.P is an employee at the CING. I.S.P is a senior research collaborator  
22  
23 750 hosted by the CING. G.N.L is a CING collaborator. E.E.N declares no-competing interest.  
24  
25  
26

27 751 No pharmaceutical companies were involved in this phase II clinical trial. The intervention is  
28  
29 752 under a USA provisional patent; Application Number 61469081.  
30  
31

32 753

33  
34 754 Ethical approval: Cyprus National bioethics committee (reference EEBK/EII/2005/10).  
35

36 755

37  
38 756 All authors have completed the Unified Competing Interest form at  
39  
40 757 [www.icmje.org/coi\\_disclosure.pdf](http://www.icmje.org/coi_disclosure.pdf) (available on request from the corresponding author) and  
41  
42 758 declare that (1) M.C.P, G.N.L, I.S.P have support from Cyprus Ministry of Commerce,  
43  
44 759 Industry and Tourism, Program for the Creation of New High Technology and Innovation  
45  
46 760 Enterprises through the Business Incubator for the submitted work; (2) E.E.N has no  
47  
48 761 relationships with Cyprus Ministry of Commerce, Industry and Tourism, or PLUPA Medical  
49  
50 762 Ltd. that might have an interest in the submitted work in the previous 3 years; (3) their  
51  
52 763 spouses, partners, or children have no financial relationships that may be relevant to the  
53  
54  
55  
56  
57  
58  
59  
60

1  
2  
3 764 submitted work; and (4) E.E.N has a non-financial interests that may be relevant to the  
4  
5 765 submitted work.  
6  
7  
8  
9

10  
11  
12  
13  
14  
15  
16  
17  
18  
19  
20  
21  
22  
23  
24  
25  
26  
27  
28  
29  
30  
31  
32  
33  
34  
35  
36  
37  
38  
39  
40  
41  
42  
43  
44  
45  
46  
47  
48  
49  
50  
51  
52  
53  
54  
55  
56  
57  
58  
59  
60

766

767 The Corresponding Author has the right to grant on behalf of all authors and does grant on  
768 behalf of all authors, an exclusive license on a worldwide basis to the BMJ Publishing Group  
769 Ltd and its Licensees to permit this article (if accepted) to be published in BMJ editions and  
770 any other BMJ PGL products and sublicences to exploit all subsidiary rights, as set out in our  
771 licence ( <http://resources.bmj.com/bmj/authors/checklists-forms/licence-for-publication>)."  
772

## Article Summary

### Article focus:

- The increasing prevalence of Multiple Sclerosis (MS), the limited efficacy and the side effects of the existing treatments urge the clinical need for the development of new, innovative, more effective, safe, and preventive treatment strategies.
- For the first time we propose three original nutraceutical treatment intervention-cocktails, formulated based on systems medicine through nutritional systems biology rational; with PLP10 representing the complete composition of the formulation and the other two treatments represent partial formulations.
- We have studied the proposed interventions on 80 relapsing remitting MS patients (four groups of 20 each) for a total of 42 months, in a randomized, double-blind, placebo-controlled, phase II proof-of-concept clinical trial.

**Key messages:**

- The per-protocol data analyses indicated that PLP10 is associated with significant efficacy versus placebo on both reducing the annualized relapse rate and disease progression without any adverse or severe side effects.
- Overall, for this small size phase II study, a total of 41 (51%) patients completed the 42-month trial. For the per-protocol analysis of the two-year primary end point, 8 relapses were recorded in the PLP10 group (n=10) (0.40 ARR) versus 25 relapses in the placebo group (n=12) (1.04 ARR), a 64% adjusted relative rate reduction for the PLP10 group (RRR 0.36, 95% CI 0.15 to 0.87, p=0.024). In a subgroup analysis that excluded patients on monoclonal antibody (natalizumab) treatment, the observed adjusted RRR became stronger (72%) over the two years (RRR 0.28, 95% CI 0.10 to 0.79, p=0.016). Per-protocol analysis for the secondary outcome at two years, time to disability progression, was significantly longer only with PLP10. The cumulative probability of disability progression at two years was 10% in the PLP10 group and 58% in the placebo group (unadjusted log-rank p=0.019). In a subgroup analysis that excluded patients on natalizumab the cumulative probability of progression was 10% for the 10 patients in the PLP10 group and 70% for the 12 patients in the placebo group, a relative 86% decrease in the risk of sustained progression of disability in the PLP10 group (unadjusted log-rank p=0.006; adjusted hazard ratio, 0.11; 95% CI 0.01 to 0.97, p=0.047).
- PLP10 has probably the ability to interfere with the total known repertoire of mechanisms involved in MS pathogenesis as well as with the recovery mechanisms, neuroprotection and remyelination.; it is potentially able to manipulate global perturbed networks of the disease causing factors rather than focusing only on unique failing components.
- This proof-of-concept clinical study might be indicative and the beginning of new avenues in MS prevention and treatment and of new epoch of novel drug development

with dynamic therapeutic potential for chronic complex multifactorial diseases.

**Strengths and limitations of this study:**

- The strength of this study is the systems medicine therapeutic approach, the length of the study the inclusion of the six months normalization (chronotherapy) period, and the study protocol following all indicated appropriate guidelines with definite inclusion/exclusion criteria and primary/secondary end points.
- The sample size and the high rate of drop-outs (palatability of the formula) are the limitations associated with the present study.
- A phase III multi-center clinical trial will establish the present intervention regime among the best choices among neurodegenerative diseases prophylaxis and MS treatment drugs faretra.

773

774

775

776

777

778

779

780

781 **References**

- 782 1. Baranzini SE, Oksenberg JR, Hauser SL. New insights into the genetics of multiple  
783 sclerosis. *Journal of Rehabilitation Research and Development* 2002;39:201-210.
- 784 2. Goni J, Esteban FJ, de Mendizabal NV, et al. A computational analysis of protein-  
785 protein interaction networks in neurodegenerative diseases. *BMC Syst Biol*  
786 2008;2:52.
- 787 3. Lobo I. Multifactorial inheritance and genetic disease. *Nature Education* 2008; 1.
- 788 4. Compston A, Coles A. Multiple sclerosis. *Lancet* 2002;359:1221.
- 789 5. Evans PH. Free radicals in brain metabolism and pathology. *British Medical Bulletin*  
790 1993;49:577-587.
- 791 6. Knight J. Reactive oxygen species and the neurodegenerative disorders. *Ann Clin Lab*  
792 *Sci* 1997;27:11-25.
- 793 7. Matute C, Alberdi E, Domercq M, Pérez-Cerdá F, Pérez-Samartín A, Sánchez-Gómez  
794 MV. The link between excitotoxic oligodendroglial death and demyelinating diseases.  
795 *Trends in Neurosciences* 2001;24:224-230.
- 796 8. Owens T. The enigma of multiple sclerosis: inflammation and neurodegeneration  
797 cause heterogeneous dysfunction and damage. *Current Opinion in Neurology*  
798 2003;16:259-265.
- 799 9. Smith KJ, Kapoor R, Felts PA. Demyelination: The role of reactive oxygen and  
800 nitrogen species. *Brain Pathology* 1999;9:69-92.
- 801 10. Ahn AC, Tewari M, Poon C-S, Phillips RS. The Clinical Applications of a Systems  
802 Approach. *PLoS Med* 2006;3:e209.
- 803 11. van Meeteren ME, Teunissen CE, Dijkstra CD, van Tol EAF. Antioxidants and  
804 polyunsaturated fatty acids in multiple sclerosis. *Eur J Clin Nutr* 2005;59:1347-1361.



- 1  
2  
3 805 12. Calder PC. n-3 Polyunsaturated fatty acids, inflammation, and inflammatory diseases.  
4  
5 806 The American Journal of Clinical Nutrition 2006;83:S1505-1519S.  
6  
7 807 13. Piani D, Fontana A. Involvement of the cystine transport system xc- in the  
8  
9 808 macrophage- induced glutamate-dependent cytotoxicity to neurons. The Journal of  
10  
11 809 Immunology 1994;152:3578-3585.  
12  
13 810 14. Youdim KA, Martin A, Joseph JA. Essential fatty acids and the brain: possible health  
14  
15 811 implications. International Journal of Developmental Neuroscience 2000;18:383-399.  
16  
17 812 15. Calder PC. Dietary modification of inflammation with lipids. Proceedings of the  
18  
19 813 Nutrition Society 2002;61:345-358.  
20  
21 814 16. Gil Á. Polyunsaturated fatty acids and inflammatory diseases. Biomedecine &  
22  
23 815 Pharmacotherapy 2002;56:388-396.  
24  
25 816 17. Ariel A, Serhan CN. Resolvins and protectins in the termination program of acute  
26  
27 817 inflammation. Trends in Immunology 2007;28:176-183.  
28  
29 818 18. Arita M, Ohira T, Sun Y-P, Elangovan S, Chiang N, Serhan CN. Resolvin E1  
30  
31 819 selectively interacts with leukotriene B4 receptor BLT1 and chemR23 to regulate  
32  
33 820 inflammation. The Journal of Immunology 2007;178:3912-3917.  
34  
35 821 19. Janakiram NB, Rao CV. Role of Lipoxins and Resolvins as Anti-Inflammatory and  
36  
37 822 Proresolving Mediators in Colon Cancer. Current Molecular Medicine 2009;9:565-  
38  
39 823 579.  
40  
41 824 20. Serhan C, Arita M, Hong S, Gotlinger K. Resolvins, docosatrienes, and  
42  
43 825 neuroprotectins, novel omega-3-derived mediators, and their endogenous aspirin-  
44  
45 826 triggered epimers. Lipids 2004;39:1125-1132.  
46  
47 827 21. Serhan CN, Chiang N, Van Dyke TE. Resolving inflammation: dual anti-  
48  
49 828 inflammatory and pro-resolution lipid mediators. Nat Rev Immunol 2008;8:349-361.  
50  
51  
52  
53  
54  
55  
56  
57  
58  
59  
60

- 1  
2  
3 829 22. Rossetti RG, Seiler C, DeLuca P, Laposata M, Zurier R. Oral administration of  
4  
5 830 unsaturated fatty acids: effects on human peripheral blood T lymphocyte proliferation.  
6  
7 831 Journal of Leukocyte Biology 1997;62:438-443.  
8  
9  
10 832 23. Vatassery G. Vitamin E and other endogenous antioxidants in the central nervous  
11  
12 833 system. Geriatrics 1998a;53:S25–S27.  
13  
14 834 24. Fukuzawa K, Gebicki JM. Oxidation of [alpha]-tocopherol in micelles and liposomes  
15  
16 835 by the hydroxyl, perhydroxyl, and superoxide free radicals. Archives of Biochemistry  
17  
18 836 and Biophysics 1983;226:242-251.  
19  
20  
21 837 25. Christen S, Woodall AA, Shigenaga MK, Southwell-Keely PT, Duncan MW, Ames  
22  
23 838 BN.  $\gamma$ -Tocopherol traps mutagenic electrophiles such as NO<sub>x</sub> and complements  $\alpha$ -  
24  
25 839 tocopherol: Physiological implications. Proceedings of the National Academy of  
26  
27 840 Sciences of the United States of America 1997;94:3217-3222.  
28  
29  
30 841 26. Brigelius-Flohé R, Kelly FJ, Salonen JT, Neuzil J, Zingg J-M, Azzi A. The European  
31  
32 842 perspective on vitamin E: current knowledge and future research. The American  
33  
34 843 Journal of Clinical Nutrition 2002;76:703-716.  
35  
36 844 27. Calder P. Polyunsaturated fatty acids, inflammatory processes and inflammatory  
37  
38 845 bowel diseases Mol Nutr Food Res 2008;52:885–897  
39  
40  
41 846 28. Edwards IJ, O'Flaherty JT. Omega-3 Fatty Acids and PPAR $\gamma$  in Cancer. PPAR  
42  
43 847 Research 2008;2008:1-15.  
44  
45 848 29. Groeger AL, Cipollina C, Cole MP, et al. Cyclooxygenase-2 generates anti-  
46  
47 849 inflammatory mediators from omega-3 fatty acids. Nat Chem Biol 2010;6:433-441.  
48  
49  
50 850 30. Dyall SC, Michael GJ, Michael-Titus AT. Omega-3 fatty acids reverse age-related  
51  
52 851 decreases in nuclear receptors and increase neurogenesis in old rats. Journal of  
53  
54 852 Neuroscience Research 2010;88:2091-2102.  
55  
56  
57  
58  
59  
60

- 1  
2  
3 853 31. McNamara RK. DHA Deficiency and Prefrontal Cortex Neuropathology in Recurrent  
4  
5 854 Affective Disorders. *The Journal of Nutrition* 2010;140:864-868.  
6  
7 855 32. Salvati S, Natali F, Attorri L, et al. Eicosapentaenoic acid stimulates the expression of  
8  
9 856 myelin proteins in rat brain. *Journal of Neuroscience Research* 2008;86:776-784.  
10  
11 857 33. Abraham M, Shapiro S, Karni A, Weiner HL, Miller A. Gelatinases (MMP-2 and  
12  
13 858 MMP-9) are preferentially expressed by Th1 vs. Th2 cells. *Journal of*  
14  
15 859 *Neuroimmunology* 2005;163:157-164.  
16  
17 860 34. C ffrench-Constant. Pathogenesis of multiple sclerosis. *The Lancet* 1994;343:271-  
18  
19 861 275.  
20  
21 862 35. Leppert D, Lindberg RLP, Kappos L, Leib SL. Matrix metalloproteinases:  
22  
23 863 multifunctional effectors of inflammation in multiple sclerosis and bacterial  
24  
25 864 meningitis. *Brain Research Reviews* 2001;36:249-257.  
26  
27 865 36. Curtis CL, Rees SG, Cramp J, et al. Effects of n-3 fatty acids on cartilage metabolism.  
28  
29 866 *Proceedings of the Nutrition Society* 2002;61:381-389.  
30  
31 867 37. Harris MA, Hansen RA, Vidsudhiphan P, et al. Effects of conjugated linoleic acids  
32  
33 868 and docosahexaenoic acid on rat liver and reproductive tissue fatty acids,  
34  
35 869 prostaglandins and matrix metalloproteinase production. *Prostaglandins, Leukotrienes*  
36  
37 870 *and Essential Fatty Acids* 2001;65:23-29.  
38  
39 871 38. McCabe A, Wallace J, Gilmore W, Strain J, McGlynn H. The effect of  
40  
41 872 eicosapentanoic acid on matrix metalloproteinase gene expression. *Lipids*  
42  
43 873 1999;34:S217-S218.  
44  
45 874 39. Shinto L, Marracci G, Bumgarner L, Yadav V. The Effects of Omega-3 Fatty Acids  
46  
47 875 on Matrix Metalloproteinase-9 Production and Cell Migration in Human Immune  
48  
49 876 Cells: Implications for Multiple Sclerosis. *Autoimmune Diseases* 2011;2011.

- 1  
2  
3 877 40. Auffray C, Chen Z, Hood L. Systems medicine: the future of medical genomics and  
4  
5 878 healthcare. *Genome Med* 2009;1:2.  
6  
7 879 41. Huang WL, King VR, Curran OE, et al. A combination of intravenous and dietary  
8  
9 880 docosahexaenoic acid significantly improves outcome after spinal cord injury. *Brain*  
10  
11 881 2007;130:3004-3019.  
12  
13 882 42. Marangoni F, Angeli MT, Colli S, et al. Changes of n – 3 and n – 6 fatty acids in  
14  
15 883 plasma and circulating cells of normal subjects, after prolonged administration of 20:5  
16  
17 884 (EPA) and 22:6 (DHA) ethyl esters and prolonged washout. *Biochimica et Biophysica*  
18  
19 885 *Acta (BBA) - Lipids and Lipid Metabolism* 1993;1210:55-62.  
20  
21 886 43. Martínez M, Vázquez E, García-Silva MT, et al. Therapeutic effects of  
22  
23 887 docosahexaenoic acid ethyl ester in patients with generalized peroxisomal disorders1.  
24  
25 888 *The American Journal of Clinical Nutrition* 2000;71:376S-385S.  
26  
27 889 44. Committee for medicinal products for human use. Guideline on clinical trials in small  
28  
29 890 populations In: *European Medicines Agency, 2006: 1-10.*  
30  
31 891 45. Gerard E Dallal. *The Little Handbook of Statistical Practice*. [online]. Available at  
32  
33 892 URL|. Accessed Date Accessed, Year|.  
34  
35 893 46. Wang YC, Meyerson L, Tang YQ, Qian N. Statistical methods for the analysis of  
36  
37 894 relapse data in MS clinical trials. *Journal of the Neurological Sciences* 2009;285:206-  
38  
39 895 211.  
40  
41 896 47. Polman CH, O'Connor PW, Havrdova E, et al. A randomized, placebo-controlled trial  
42  
43 897 of natalizumab for relapsing multiple sclerosis. *The New England Journal of*  
44  
45 898 *Medicine* 2006;354:899-910.  
46  
47 899 48. Kappos L, Radue E-W, O'Connor P, et al. A Placebo-Controlled Trial of Oral  
48  
49 900 Fingolimod in Relapsing Multiple Sclerosis. *New England Journal of Medicine*  
50  
51 901 2010;362:387-401.  
52  
53  
54  
55  
56  
57  
58  
59  
60

- 1  
2  
3 902 49. Cunnane S, Ho S, Dore-Duffy P, Ells K, Horrobin D. Essential fatty acid and lipid  
4 profiles in plasma and erythrocytes in patients with multiple sclerosis. The American  
5 903  
6 Journal of Clinical Nutrition 1989;50:801-806.  
7  
8  
9  
10 905 50. Harbige LS, Sharief MK. Polyunsaturated fatty acids in the pathogenesis and  
11 treatment of multiple sclerosis. British Journal of Nutrition 2007;98:S46-S53.  
12 906  
13  
14 907 51. Wilson R, Tocher D. Lipid and fatty acid composition is altered in plaque tissue from  
15 multiple sclerosis brain compared with normal brain white matter. Lipids 1991;26:9-  
16 908  
17 15.  
18 909  
19  
20  
21 910 52. Rafat AS, Saame RS, Laura AS, Heidi RY, William S, Gary PZ. Omega 3-Fatty  
22 Acids: Health Benefits and Cellular Mechanisms of Action. Mini Reviews in  
23 911  
24 Medicinal Chemistry 2004;4:859-871.  
25 912  
26  
27 913 53. Shaikh SR, Edidin M. Polyunsaturated fatty acids, membrane organization, T cells,  
28 and antigen presentation. The American Journal of Clinical Nutrition 2006;84:1277-  
29 914  
30 1289.  
31 915  
32  
33  
34 916 54. Lajtha A, Toth J, Fujimoto K, Agrawal CH. Turnover of Myelin Proteins in Mouse  
35 Brain in vivo. Biochem J 1977;164:323-329.  
36 917  
37  
38 918 55. LeBaron FN, Sanyal S, Jungalwala FB. Turnover rate of molecular species of  
39 sphingomyelin in rat brain. Neurochemical Research 1981;6:1081-1089.  
40 919  
41  
42  
43 920 56. Yao JK. Increased polyunsaturated fatty acids in developing and regenerating  
44 peripheral nerve. Biochimica et Biophysica Acta (BBA) - Lipids and Lipid  
45 921  
46 Metabolism 1982;712:542-546.  
47 922  
48  
49 923 57. Riccio P. The molecular basis of nutritional intervention in multiple sclerosis: a  
50 narrative review. Complement Ther Med 2011;19:228-237.  
51 924  
52  
53  
54 925 58. Farinotti M, Simi S, Di Pietrantonj C, McDowell N, et al. Dietary interventions for  
55 multiple sclerosis (Review), the Cochrane Library 2007, issue I.  
56 926  
57  
58  
59  
60

1  
2  
3 927 **Figure legends**  
4

5  
6 928 **Figure 1.** Study Flowchart  
7

8  
9 929 **Figure 2.** Omega-6 and omega-3 PUFA, their respective metabolic derivatives and their  
10  
11 possible effects on inflammation.  
12

13  
14  
15 931 After consumption, the PUFAs are metabolized via several pathways (not shown) to active  
16  
17 932 compounds that mediate inflammation and products that promote resolution of inflammation.  
18

19  
20 933 Abbreviations: PL, phospholipid; IFN- $\gamma$ , interferon  $\gamma$ ; IL-2, interleukin 2; NF $\kappa$ B, nuclear  
21  
22 934 factor kappa B; PGE2, prostaglandin E2; PPAR $\gamma$ , peroxisome proliferator-activated receptor  
23  
24 935  $\gamma$ ; PUFAs, polyunsaturated fatty acids; TGF $\beta$ , transforming growth factor  $\beta$ ; TNF, tumor  
25  
26 936 necrosis factor; COX, cyclooxygenase; hydroxyeicosatetraenoic acid; HPETE,  
27  
28 937 hydroperoxyeicosatetraenoic acid; LOX, lipoxygenase; LT, leukotriene; PG, prostaglandin;  
29  
30 938 TX, thromboxane; RXR- $\gamma$ , retinoid X receptor-gamma; Nrf2, nuclear respiratory factor;  
31  
32 939 MMP, metalloproteinase.  
33  
34

35  
36  
37 940 **Figure 3.** Panel A demonstrates the ARR of all-time on-study patients during the 24mo pre-  
38  
39 941 treatment (baseline ARR) and at different on-study intervals (6, 12, 18, 24 mo) per treatment  
40  
41 942 arm. \*\*  
42

43  
44 943 Panel B demonstrates the ARR of all-time on-study population between 0-6, 6-12, 6-18, and  
45  
46 944 6-24 mo period intervals, of PLP10 vs. placebo group. \*\*  
47

48  
49 945 Panel C demonstrates the ARR of all-time on-study population of PLP10 vs. placebo group at  
50  
51 946 baseline, during 1<sup>st</sup> year, and during the 2-year on-treatment. \*\*  
52

53  
54  
55 947 Panel D demonstrates the dispersion of relapses throughout the 2-year period of all-time on-  
56  
57 948 study (excluding patients on natalizumab) of PLP10 (n=10) vs. placebo (n=10). Placebo  
58  
59  
60

1  
2  
3 949 shows an irregular dispersion of relapses in relation to PLP10 group with linear increasing  
4  
5 950 trend while PLP10 shows a stabilized linear trend. By using the per-protocol model where  
6  
7 951 patients on natalizumab were excluded, we could compare the number of relapses on a same  
8  
9 952 number of patients.

10  
11  
12  
13 953 \*\* Including the patients on natalizumab.

14  
15  
16 954 **Figure 4.** Panel 4A demonstrates the Kaplan–Meier plot of the time to sustained progression  
17  
18 955 of disability among all-time on-study patients, excluding patients on natalizumab, receiving  
19  
20 956 intervention A, PLP10 and C as compared with placebo. PLP10 reduced the risk of sustained  
21  
22 957 progression of disability by 86% over two years (p=0.006). Intervention formula A reduced  
23  
24 958 the risk of sustained progression of disability by 53% (p=0.266) and intervention formula C  
25  
26 959 by 67% (p=0.061).

27  
28  
29  
30 960 Panel 4B demonstrates the Kaplan–Meier plot of the time to sustained progression of  
31  
32 961 disability among ITT population receiving intervention A, PLP10 and C as compared with  
33  
34 962 placebo. PLP10 reduced the risk of sustained progression of disability by 71% over two years  
35  
36 963 (p=0.052, trend). Intervention formula A reduced the risk of sustained progression of  
37  
38 964 disability by 22% (p=0.727) and intervention formula C by 40% (p=0.447).

39  
40  
41 965 **Figure 5.** Mean change in expanded disability status scale score as a function of visit  
42  
43 966 number. Values are expressed as mean ± s.e.m.

44  
45  
46  
47 967 ¶ Including patients on natalizumab

48  
49  
50 968 ¶¶ Excluding patients on natalizumab

51  
52  
53 969

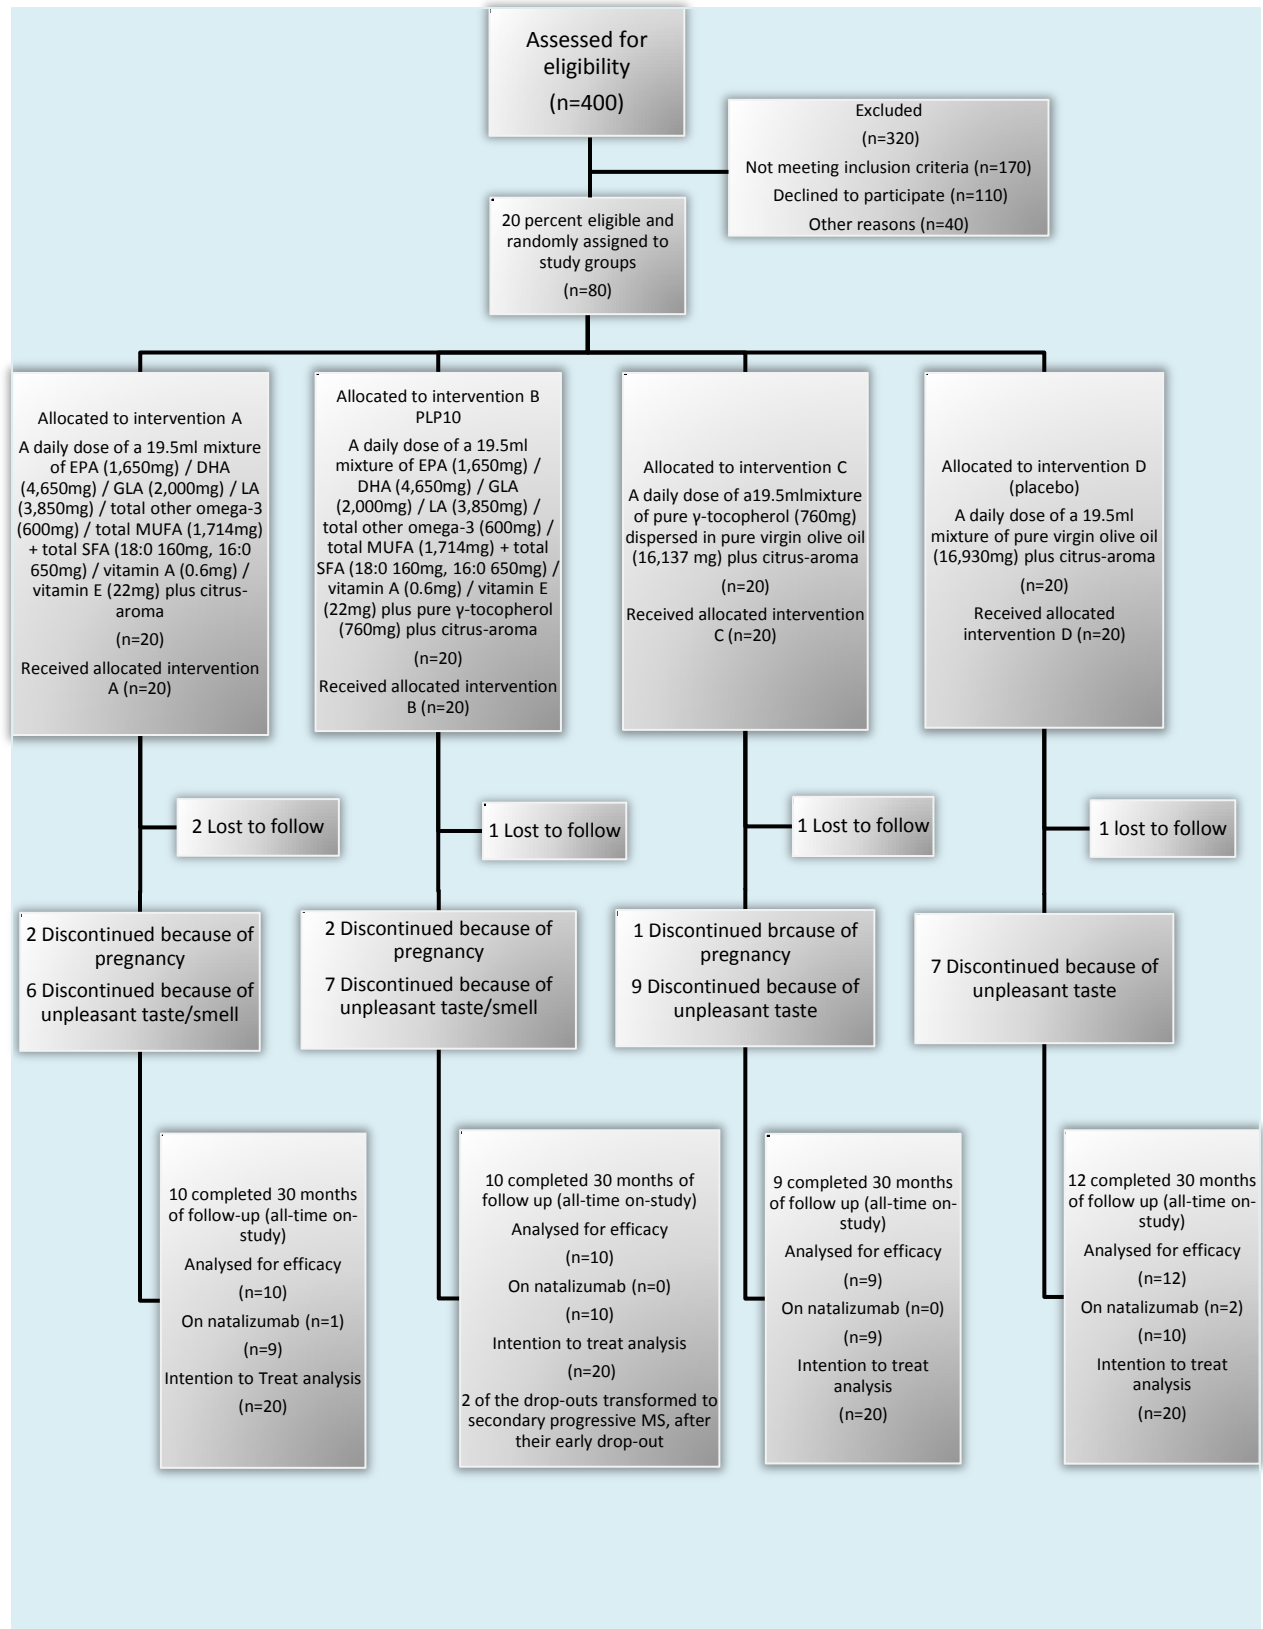



**Omega-6 and omega-3 PUFA Consumption through Diet**

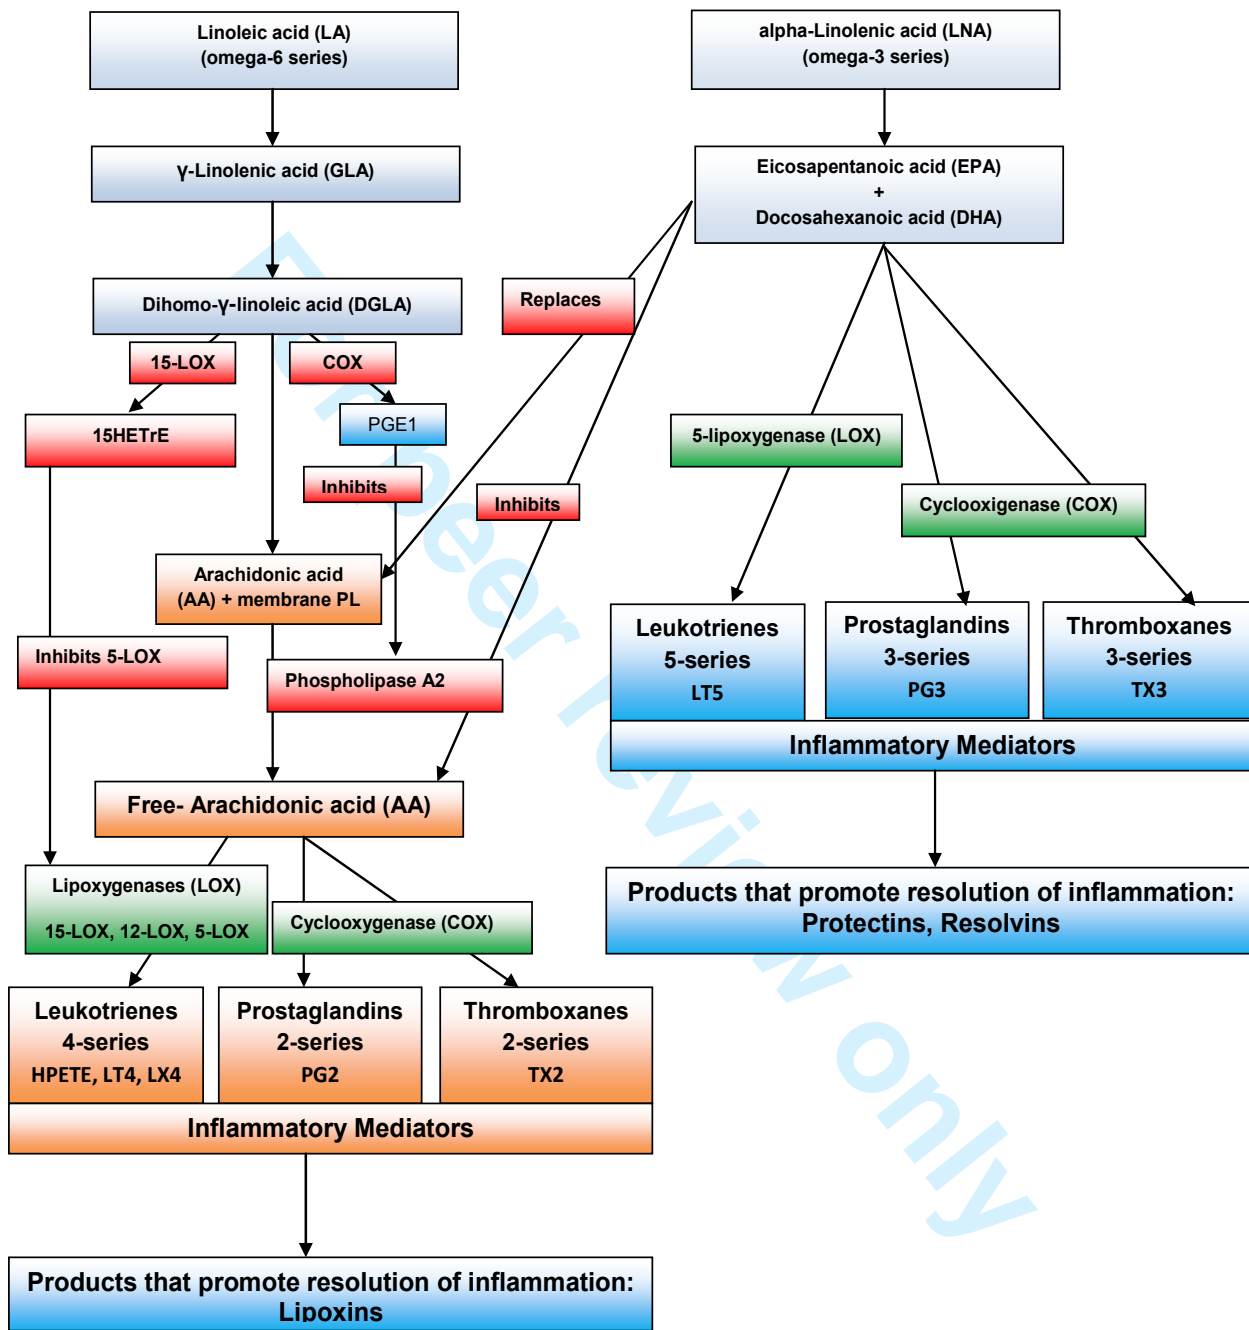

**Possible effects on inflammation:**  
 Reduce IFN- $\gamma$  production; Reduce IL-2 production; Increase TGF $\beta$  activity; Increase PGE2 activity; Inhibit arachidonic acid; Reduce TNF levels; RXR- $\gamma$  and PPAR $\gamma$  agonist; NF $\kappa$ B expression; stimulate Nrf2; reduce MMP-2, -3, -9, and -13

1  
2  
3  
4  
5  
6  
7  
8  
9  
10  
11  
12  
13  
14  
15  
16  
17  
18  
19  
20  
21  
22  
23  
24  
25  
26  
27  
28  
29  
30  
31  
32  
33  
34  
35  
36  
37  
38  
39  
40  
41  
42  
43  
44  
45  
46  
47  
48  
49  
50  
51  
52  
53  
54  
55  
56  
57  
58  
59  
60

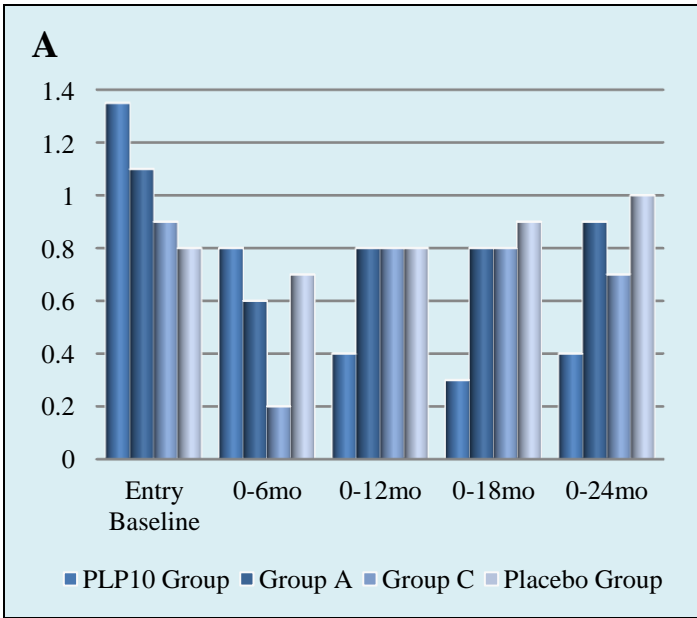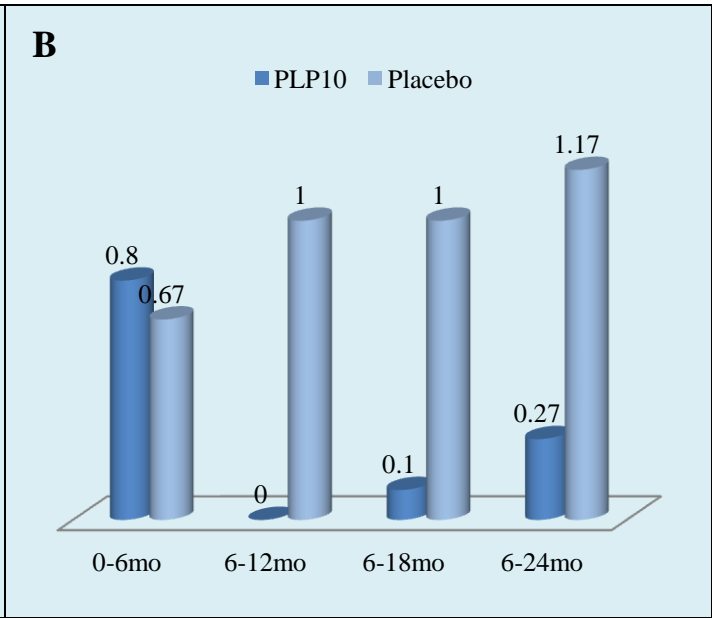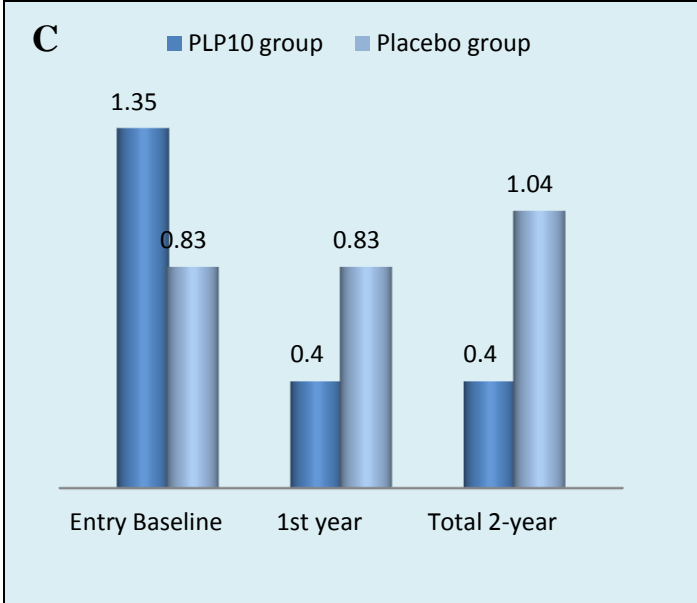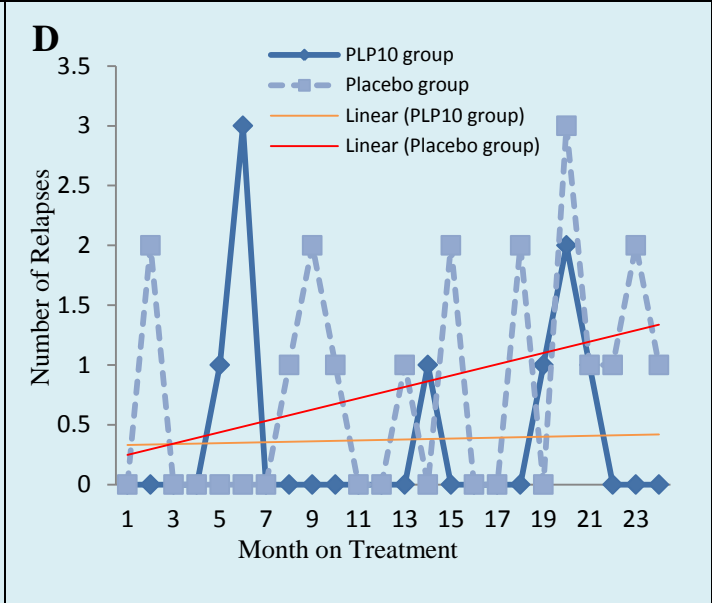

Only

1  
2  
3  
4  
5  
6  
7  
8  
9  
10  
11  
12  
13  
14  
15  
16  
17  
18  
19  
20  
21  
22  
23  
24  
25  
26  
27  
28  
29  
30  
31  
32  
33  
34  
35  
36  
37  
38  
39  
40  
41  
42  
43  
44  
45  
46  
47  
48  
49  
50  
51  
52  
53  
54  
55  
56  
57  
58  
59  
60

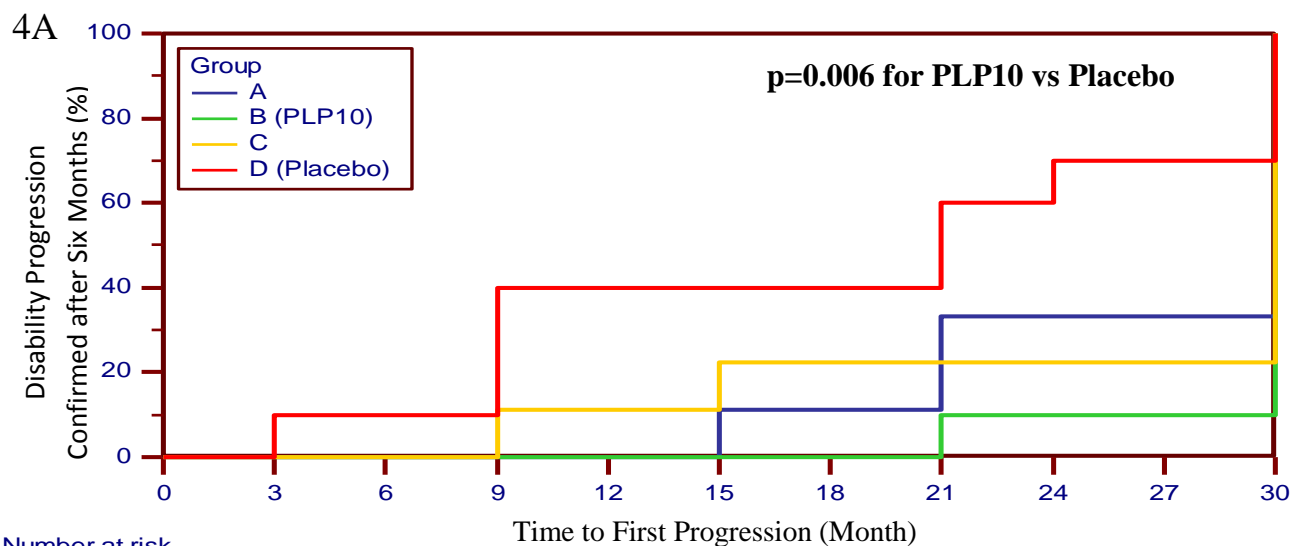

| Number at risk     | 0  | 3  | 6  | 9  | 12 | 15 | 18 | 21 | 24 | 27 | 30 |
|--------------------|----|----|----|----|----|----|----|----|----|----|----|
| Group: A           | 9  | 9  | 9  | 9  | 9  | 8  | 8  | 6  | 6  | 6  | 6  |
| Group: B (PLP10)   | 10 | 10 | 10 | 10 | 10 | 10 | 10 | 9  | 9  | 9  | 9  |
| Group: C           | 9  | 9  | 9  | 8  | 8  | 7  | 7  | 7  | 7  | 7  | 7  |
| Group: D (Placebo) | 10 | 9  | 9  | 6  | 6  | 6  | 6  | 4  | 3  | 3  | 3  |

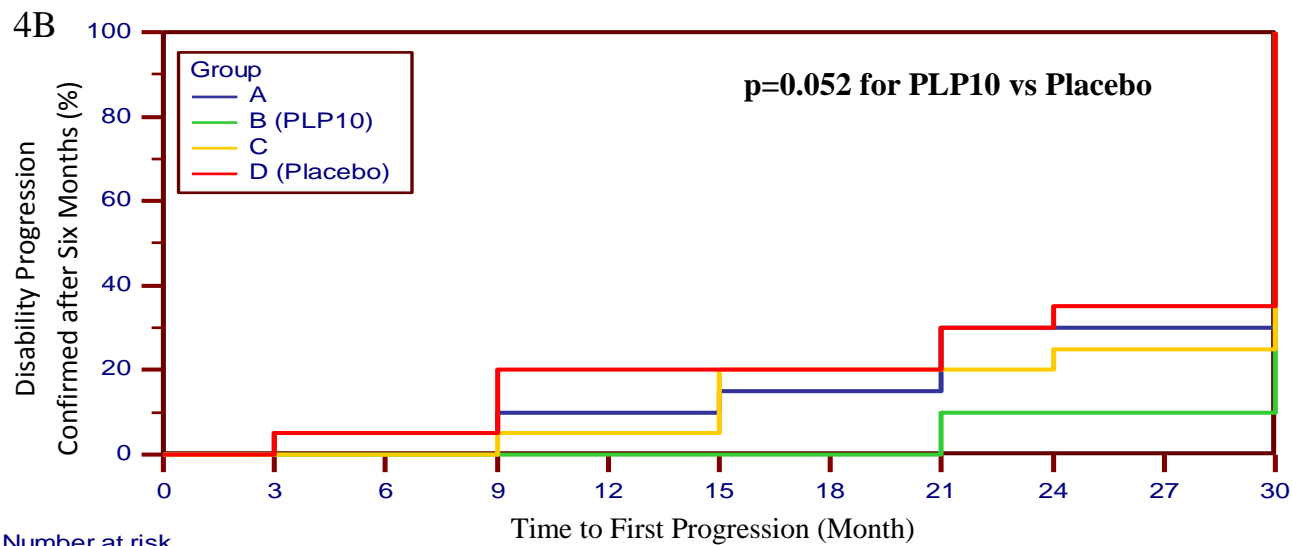

| Number at risk     | 0  | 3  | 6  | 9  | 12 | 15 | 18 | 21 | 24 | 27 | 30 |
|--------------------|----|----|----|----|----|----|----|----|----|----|----|
| Group: A           | 20 | 19 | 19 | 18 | 18 | 17 | 17 | 14 | 14 | 14 | 14 |
| Group: B (PLP10)   | 20 | 20 | 20 | 20 | 20 | 20 | 20 | 18 | 18 | 18 | 18 |
| Group: C           | 20 | 20 | 20 | 19 | 19 | 16 | 16 | 16 | 15 | 15 | 15 |
| Group: D (Placebo) | 20 | 19 | 19 | 16 | 16 | 16 | 16 | 14 | 13 | 13 | 13 |

1  
2  
3  
4  
5  
6  
7  
8  
9  
10  
11  
12  
13  
14  
15  
16  
17  
18  
19  
20  
21  
22  
23  
24  
25  
26  
27  
28  
29  
30  
31  
32  
33  
34  
35  
36  
37  
38  
39  
40  
41  
42  
43  
44  
45  
46  
47  
48  
49  
50  
51  
52  
53  
54  
55  
56  
57  
58  
59  
60

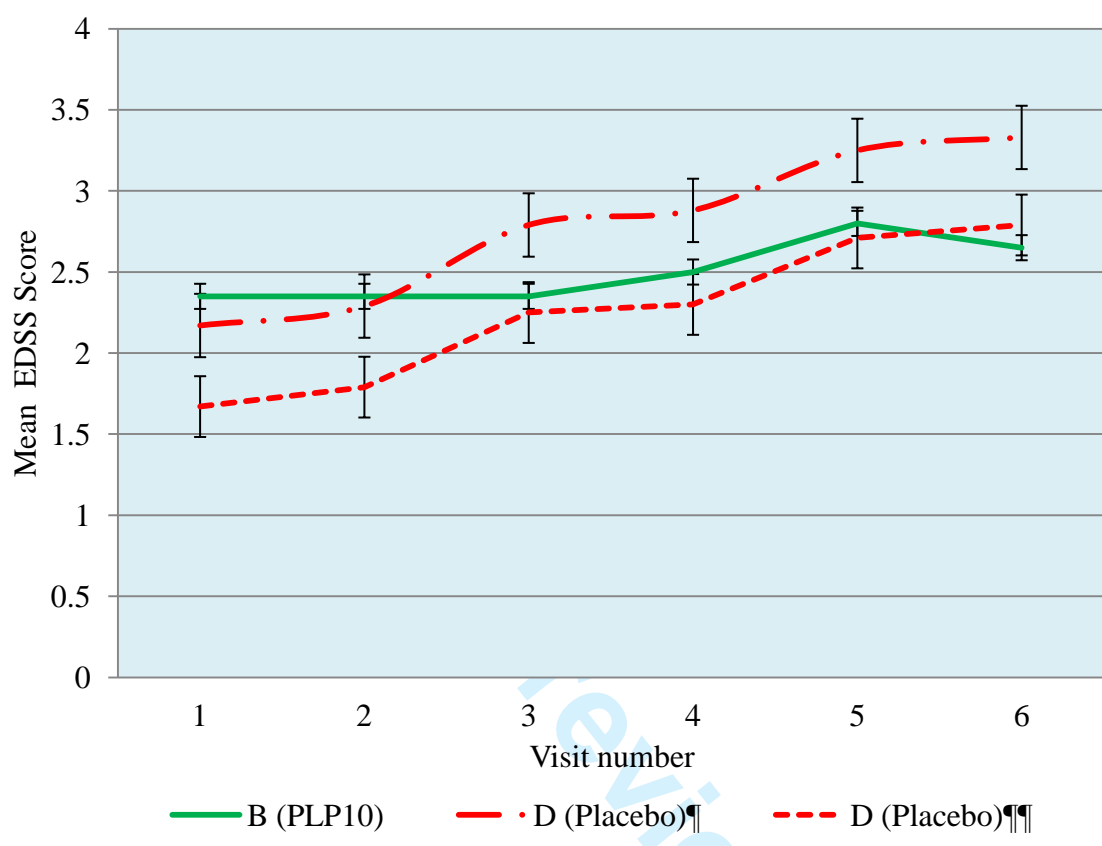

1  
2  
3 **1 Supplementary Information**  
4

5 **2 Table of Content**  
6  
7

| <b>Supplementary Section</b>        | <b>Page</b> |
|-------------------------------------|-------------|
| Supplementary Information Methods 1 | <b>2-4</b>  |
| Supplementary Information Methods 2 | <b>5-6</b>  |
| Supplementary Information Figure 1  | <b>7</b>    |
| Supplementary Information Figure 2  | <b>8</b>    |

8  
9  
10  
11  
12  
13  
14  
15  
16  
17  
18  
19  
20  
21 **4**  
22 **5**  
23 **6**  
24 **7**  
25 **8**  
26 **9**  
27 **10**  
28 **11**  
29 **12**  
30 **13**  
31 **14**  
32 **15**  
33 **16**  
34 **17**  
35 **18**  
36 **19**  
37 **20**  
38 **21**  
39 **22**  
40 **23**  
41 **24**  
42 **25**  
43 **26**  
44 **27**  
45 **28**  
46 **29**  
47 **30**  
48 **31**  
49 **32**  
50 **33**  
51  
52  
53  
54  
55  
56  
57  
58  
59  
60

### 34 **Supplementary Information Methods 1**

35 **Intervention and study rational.** We are using high dosage of 1:1 omega-3:omega-6  
36 polyunsaturated (PUFA) aiming to overpass and normalize global diet regional traditions and  
37 habits in relation to abnormal PUFA/saturated fatty acids (SFA)/monounsaturated fatty acids  
38 (MUFA) daily ratio consumption irrespective of the quantities consumed; and enough to  
39 equilibrate patients' diet in line with the recommended more physiologic omega-3:omega-6  
40 ratio of about 1:1-4 wt/wt as reported by Simopoulos, 2002. In addition to correct existing  
41 deficiencies, cell membrane abnormalities, specifically of the immunopathological system  
42 and blood mononuclear peripheral cells, and high enough for availability and immediate  
43 ongoing modulation of the involved pathogenic mechanisms and network of events in MS.  
44 The high dosage is also required to overpass the quantity limitations, previously discussed, of  
45 diet-consumed PUFAs for cellular incorporation, especially in the central nervous system  
46 (CNS) of adults. Additionally, fatty acids (FAs) must first cross the intestinal epithelium  
47 before reaching the different tissues, where digestion and absorption constitute further  
48 problems in their availability (Carlier, H, 1991). Omega-3 PUFA are used in re-esterified  
49 form to eliminate unwanted disturbances, at the sides of action, by other fatty acids and  
50 molecules present in crude fish oils but also to increase the bioavailability of the FA since  
51 triglycerides have been shown to be associated with much higher bioavailability (Dyerberg et  
52 al, 2010). Linoleic (LA) and gamma linolenic acid (GLA) are essential structure molecules  
53 and important for any physiological (re)generation of cell membrane. GLA quantity is  
54 doubled to LA to ensure high direct production of dihomo-gamma-linolenic acid (DGLA),  
55 from GLA when LA cannot be metabolized, due to desaturase deficiency or malfunction.  
56 Such a reduced capacity to convert LA to GLA has been associated with aging, diabetes,  
57 alcoholism, atopic dermatitis, premenstrual syndrome, rheumatoid arthritis, cancer and  
58 cardiovascular diseases (Bolton-Smith et al, 1997; Horrobin, 1990; Leventhal et al, 1993).  
59 This is going to result in the increase of DGLA relative to arachidonic acid (AA) with DGLA  
60 promoting production of prostaglandin (PG)E1 but also inhibition of phospholipase (PL)A2:  
61 two major reasons and rational for their use. If other metabolic problems are involved within  
62 the omega-6 series and the normal metabolites are not produced then the eicosapentaenoic  
63 acid EPA available in PLP10 will substitute the function of DGLA, as a competitive inhibitor  
64 of AA for PLA2. In both cases the pro-inflammatory leucotrienes, prostaglandines of the 2-  
65 series (PG2) and thromboxanes of the 2 series including the platelet-activator factor (PAF)  
66 will be attenuated. The synthesis of AA from DGLA by  $\Delta 5$  desaturase promoted by LA/GLA  
67 supplementation is very limited in humans as a result of limited activity of the enzyme  
68 (Yang-Yi & Robert, 1998). AA in the body is mostly available through diet. EPA and  
69 docosahexaenoic acid (DHA) are both physiologically important and crucial structured  
70 molecules able to substitute excess AA and SFA within the cell membranes. EPA will  
71 contribute to the inhibition (competitive to AA) of PLA2, joining the co-supplied omega-6  
72 PUFA but will also participate in the production of anti-inflammatory leukotrienes,  
73 prostaglandins of the 3-series (PG3) and thromboxane (TX3) along with DHA, both found in  
74 the PLP10 intervention. Moreover EPA will replace AA of the membrane phospholipids and  
75 both omega-3 PUFA will contribute replacing abnormal quantities of SFA and excess AA.  
76 DHA is used in 3:1 ratio to EPA to cover any possible inabilities of EPA to be metabolized,  
77 high enough to strongly promote high production of the aforementioned anti-inflammatory

1  
2  
3 78 eicosanoids and cytokines and to be incorporated into CNS cell membranes where DHA  
4 79 should be the major PUFA present, replacing other FA, probably saturated and excess of AA.  
5 80 EPA, DHA, LA and GLA along with the rest of the other ingredients used (“other” omega-3  
6 81 PUFA, SFA and MUFA that are usually found in the cell membranes of healthy people in  
7 82 limited quantities) in the intervention regimen are for their availability as minor structural  
8 83 constituents of physiological cellular membranes integrity, fluidity and overall function as  
9 84 building blocks for myelin repair and/or myelination. Furthermore the PUFA used within the  
10 85 cocktail intervention aimed to manipulate all other pathophysiological pathways that are  
11 86 reported to be able to: as previously discussed including gene transcription for  
12 87 neuroprotection and remyelination. Furthermore, PUFA are used to ensure the integrity of  
13 88 blood brain barrier (BBB) and to modulate the gelatinases responsible for the T cell migration  
14 89 within the CNS. Three different antioxidant vitamins (vitamin E, mostly as alpha-tocopherol,  
15 90 gamma ( $\gamma$ )-tocopherol (vitamin E isoform) and vitamin A) are used in the regimen  
16 91 preparation to support the cellular antioxidant defenses but also to protect peroxidation of the  
17 92 supplied increased amounts of PUFA. Alpha-tocopherol low-molecular-weight antioxidants  
18 93 will contribute to radical scavenging, interfering with gene transcription, protein expression,  
19 94 enzyme activity and metal chelation (van Meeteren et al, 2005). Vitamin E (alpha tocopherol)  
20 95 and vitamin A are used as antioxidants for the protection of the excess supplemented PUFA,  
21 96 with alpha-tocopherol been demonstrated to protect against peroxynitrite-induced oxidative  
22 97 damage, as well as able to efficiently detoxify hydroxyl, perhydroxyl and superoxide free  
23 98 radicals (the elevated reactive oxygen species (ROS)); each one with different mechanism of  
24 99 action, increasing the effect capability (Vatassery et al, 1998b; van Meeteren, 2005). Gamma-  
25 100 tocopherol is used in high dosage since its half life is very short compared to alpha-  
26 101 tocopherol and has been demonstrated to specifically protect against nitro-radicals.  
27 102 Tocopherols can also exert non-antioxidant properties, including modulation of cell signaling  
28 103 and immune function, regulation of transcription, and induction of apoptosis as previously  
29 104 discussed (van Meeteren et al, 2005).

30  
31  
32  
33  
34  
35  
36  
37  
38  
39 105 PLP10 is the first preparation ever developed for MS therapy that is composed by the use of  
40 106 all different previously discussed PUFA, MUFA, SFA in a cocktail preparation mixed with  
41 107 the specific aforementioned antioxidant vitamins that have never been all together used  
42 108 before within a specific formulation. The ingredients ratio, quality, structural form and  
43 109 mostly the high dosage has never been before tested. Furthermore, the knowledge and  
44 110 chronotherapy as well as other unique limitations associated with the individual molecules  
45 111 used, have never been accounted, discussed, proposed or reported for any previous  
46 112 therapeutic regimen.

47  
48  
49  
50 113 Through systems medicine therapeutic philosophy, by the use of PLP10, potentially MS  
51 114 patients have the opportunity to be treated holistically, by natural source isolated molecules,  
52 115 demonstrated as able of affecting and modulating all known pathophysiological,  
53 116 immunopathological, habitual, gene related factors; thus the dynamic interconnected complex  
54 117 network of events simultaneously. Possibly synergistic effects between PLP10 ingredients are  
55 118 also feasible. Moreover we can speculate that treatment efficacy of PLP10, when used as

- 1  
2  
3 119 adjunct to existing pharmaceuticals produced by reductionism, can be proven therapeutically  
4 120 superior to any available treatment for MS.  
5  
6 121  
7  
8 122 Bolton-Smith C, Woodward M, Tavendale R (1997) Evidence for age-related differences in  
9 123 the fatty acid composition of human adipose tissue, independent of diet. *European Journal of*  
10 124 *Clinical Nutrition* **51**: 619-624  
11  
12 125  
13 126 Carlier H, Bernard A, Caselli C (1991) Digestion and absorption of polyunsaturated fatty  
14 127 acids. *Reproduction, nutrition, development* **31**: 475-500  
15  
16 128  
17 129 Dyerberg J, Madsen P, Møller JM, Aardestrup I, Schmidt EB (2010) Bioavailability of  
18 130 marine n-3 fatty acid formulations. *Prostaglandins, leukotrienes, and essential fatty acids* **83**:  
19 131 137-141  
20  
21 132  
22 133 Horrobin DF (1990) Gamma-linolenic acid. *Rev Contemp Physiol* **1**: 1-41  
23  
24 134  
25 135 Leventhal LJ, Boyce EG, Zurier RB (1993) Treatment of rheumatoid arthritis with  
26 136 gammalinolenic acid. *Annals of Internal Medicine* **119**: 867-873  
27  
28 137  
29 138 Simopoulos AP (2002) The importance of the ratio of omega-6/omega-3 essential fatty acids.  
30 139 *Biomedicine & Pharmacotherapy* **56**: 365-379  
31  
32 140  
33 141 van Meeteren ME, Teunissen CE, Dijkstra CD, van Tol EAF (2005) Antioxidants and  
34 142 polyunsaturated fatty acids in multiple sclerosis. *Eur J Clin Nutr* **59**: 1347-1361  
35  
36 143  
37 144 Yang-Yi F, Robert SC (1998) Importance of Dietary g-Linolenic acid in human health and  
38 145 nutrition. *The Journal of Nutrition* **128**: 1411-1414  
39  
40 146  
41 147 Vatassery GT, Smith WE, Quach HT (1998b) Alpha-tocopherol in rat brain subcellular  
42 148 fractions is oxidized rapidly during incubations with low concentrations of peroxynitrite.  
43 149 *Journal of Nutrition* **128**:152–157.  
44  
45 150  
46 151  
47 152  
48 153  
49 154  
50 155  
51 156  
52 157  
53 158  
54 159  
55  
56  
57  
58  
59  
60



## 160 **Supplementary Information Methods 2**

161 **Interventions specifications.** The specific omega-3 (re-esterified glycerides) and omega-6  
162 (glycerides) raw materials were purchased according to the required interventions' PUFA-  
163 fraction specification (molecular structure, quantity/ratio and quality) with vitamin E (alpha-  
164 tocopherol) used as antioxidant stabilizer by the supplier. The vitamins and masking aroma  
165 were purchased separately. The mixing of fractions to the final required intervention-  
166 composition specification was always performed by the same team of scientists under the  
167 supervision of the involved medical biochemist and lipidology specialist, under appropriate  
168 conditions every six months. Interventions were stored refrigerated in dark until use.

169  
170 The ratios of the different ingredients used were as follows: omega-3, EPA to DHA (about 1  
171 to 3 wt/wt), omega-6, LA to GLA (about 2 to 1 wt/wt), omega-3 (EPA + DHA) to omega-6  
172 (LA + GLA) (about 1 to 1 wt/wt). The total omega-3 (EPA + DHA + "other" omega-3  
173 PUFA) used as re-esterified triglycerol (minimum value 60%), diglyceride (about 33%),  
174 monoglyceride (about 2%) structural form mixture and about 2% ethyl ester structural form,  
175 with no less than 80% re-esterified triglycerol content to be DHA and EPA as a result of  
176 PUFA triglycerides re-esterification of fish body oils. The "other" group of omega-3 on the  
177 re-esterified glycerols included the 18:3 (alpha-linolenic acid), 18:4 (stearidonic acid), 20:4  
178 (eicosatetraenoic acid) and 22:5 (docosapentaenoic acid) PUFA. The fraction of omega-6  
179 (LA + GLA) used as triglycerides with no less than 50-65% triglycerol content to be LA and  
180 GLA in a ratio of 2 to 1 with 18:1 (oleic acid) 14-20% and 20:1 (eicosenoic acid), 22:1  
181 (docosenoic acid), 24:1 (tetracosenic acid) as additional monounsaturated fatty acids and  
182 minor quantities of 16:0 (palmitic acid) 4-16%, 18:0 (stearic acid) 2-5% saturated fatty acids  
183 from Borage oil source. The vitamins used were vitamin A as beta-carotene, vitamin E  
184 (alpha-tocopherol) and pure gamma-tocopherol (vitamine E isoform). Citrus extract was used  
185 as masking aroma and pure virgin olive oil as delivery vehicle.

186  
187 **The daily intervention formula agent dosages were:**

188 **Intervention formula A** daily dosage: EPA (1650mg) / DHA (4650mg) / GLA (2000mg) /  
189 LA (3850mg) / total other omega-3 (600mg) / total monounsaturated fatty acids (MUFA)  
190 (18:1 1300mg, 20:1 250mg, 22:1 82mg, 24:1 82mg) + total saturated fatty acids (SFA) (18:0  
191 160mg, 16:0 650mg) / vitamin A (0.6mg) / vitamin E (22mg).

192 **Intervention formula B (PLP10)** daily dosage: EPA (1650mg) / DHA (4650mg) / GLA  
193 (2000mg) / LA (3850mg) / total other omega-3 (600mg) / total MUFA (18:1 1300mg, 20:1  
194 250mg, 22:1 82mg, 24:1 82mg) + total SFA (18:0 160mg, 16:0 650mg) / vitamin A (0.6mg) /  
195 vitamin E (22mg) / gamma- tocopherol ( $\gamma$ -tocopherol) (760 mg).

196 **Intervention formula C** daily dosage:  $\gamma$ -tocopherol (760 mg) (in 16137 mg pure virgin olive  
197 oil as a vehicle).

198 **Intervention formula D** daily dosage: pure virgin olive oil (16930mg).

199 Citrus aroma was added in each intervention formula to make up a total dosage of 19.5ml of  
200 solution per day.

1  
2  
3 201 The specific omega-3 related fraction, according to specifications required for the  
4 202 interventions was prepared and purchased from EPAX AS, Aalesund, Norway; as re-  
5 203 esterified glycerides from fish body oils as a source. The specific omega-6 PUFA, MUFA  
6 204 and SFA related fraction, according to required specifications, was prepared and purchased  
7 205 from Goerlich Pharma International GmbH, Edling, Germany, as triglycerides from Borage  
8 206 seed oil (organic, cold pressed) "*Borago officinalis*" as a source. Both omega-3 and omega-6  
9 207 fractions were delivered stabilized by the producer (vitamine E (alpha-tocopherol) ~ 4.5 mg/g  
10 208 was used as antioxidant).

14 209 Vitamins: vitamin A as beta-carotene (HealthAid Ltd., Middlesex, United Kingdom) and pure  
15 210 gamma-tocopherol (Tama Biochemical Co. Ltd., Shinjuku-ku Tokyo, Japan).

17 211 Citrus aroma (Givaudan Schwaiz AG, Dubendorf, Switzerland).

18  
19  
20 212

21  
22  
23 213

24  
25  
26 214

27  
28  
29 215

30  
31  
32 216

33  
34  
35 217

36  
37  
38 218

39  
40  
41 219

42  
43  
44 220

45  
46  
47 221

48  
49  
50 222

51  
52  
53 223



**Supplementary Information Figure 1 | Population on DMT and/or natalizumab.** (a) Demonstrates the all-time on-study population per treatment arm that was receiving or not receiving DMT at entry baseline and the same population at the end of the trial (including patients on natalizumab). No statistical significant differences were calculated. The all-time on-study patients per treatment-arm that were receiving DMT at entry baseline were six patients out of ten (60%) within group A, four out of ten (40%) within PLP10 group, six out of nine (66%) within group C and six out of 12 (50%) within placebo. When the study completed, 80% of the patients in group A, 60% in PLP10 group, 66% in group C and 75% of the patients in placebo ended up on treatment. Within group A one out of eight and within placebo two out of nine patients on DMT transferred on natalizumab. (b) Demonstrates the total randomized population per treatment arm that was receiving or not receiving DMT at entry baseline and the same population at the end of the trial without lost to follow (including patients on natalizumab). A total of 61% of group A patients were on DMT at entry baseline and became 72% at the end; for PLP10 group 41% and became 53%; for group C 73% and became 74% and for placebo 53% and became 74% at study completion. At the end: for group A, four out of 13 patients on DMT transferred on natalizumab; for PLP10 group no patient was on natalizumab; for Group C two out of 14 patients on DMT transferred on natalizumab; and for placebo group four out of the 14 patients on DMT transferred on natalizumab. No significant differences measured at entry baseline between the groups.

224

225

226

227

1  
2  
3  
4  
5  
6  
7  
8  
9  
10  
11  
12  
13  
14  
15  
16  
17  
18  
19  
20  
21  
22  
23  
24  
25  
26  
27  
28  
29  
30  
31  
32  
33  
34  
35  
36  
37  
38  
39  
40  
41  
42  
43  
44  
45  
46  
47  
48  
49  
50  
51  
52  
53  
54  
55  
56  
57  
58  
59  
60



228

229

### Checklist of Items for Reporting Trials of Nonpharmacologic Treatments\*

| Section                    | Item | Standard CONSORT Description                                                                                                                                                              | Extension for Nonpharmacologic Trials                                                                                                                                       | Reported on Page No.                   |
|----------------------------|------|-------------------------------------------------------------------------------------------------------------------------------------------------------------------------------------------|-----------------------------------------------------------------------------------------------------------------------------------------------------------------------------|----------------------------------------|
| <b>Title and abstract†</b> | 1    | How participants were allocated to interventions (e.g., “random allocation,” “randomized,” or “randomly assigned”)                                                                        | In the abstract, description of the experimental treatment, comparator, care providers, centers, and blinding status                                                        | 1,3,4                                  |
| <b>Introduction</b>        |      |                                                                                                                                                                                           |                                                                                                                                                                             |                                        |
| Background                 | 2    | Scientific background and explanation of rationale                                                                                                                                        |                                                                                                                                                                             | 5 to 8                                 |
| <b>Methods</b>             |      |                                                                                                                                                                                           |                                                                                                                                                                             |                                        |
| Participants†              | 3    | Eligibility criteria for participants and the settings and locations where the data were collected                                                                                        | When applicable, eligibility criteria for centers and those performing the interventions                                                                                    | 8, 13,15                               |
| Interventions†             | 4    | Precise details of the interventions intended for each group and how and when they were actually administered                                                                             | Precise details of both the experimental treatment and comparator                                                                                                           | 9,10,11, Table 1 p.28, Appendix p. 5,6 |
|                            | 4A   |                                                                                                                                                                                           | Description of the different components of the interventions and, when applicable, descriptions of the procedure for tailoring the interventions to individual participants | 10, Table 1 p.28, Appendix p.5         |
|                            | 4B   |                                                                                                                                                                                           | Details of how the interventions were standardized                                                                                                                          | 9,10, Table 1 p.28, Appendix p.5       |
|                            | 4C   |                                                                                                                                                                                           | Details of how adherence of care providers with the protocol was assessed or enhanced                                                                                       | 9                                      |
| Objectives                 | 5    | Specific objectives and hypotheses                                                                                                                                                        |                                                                                                                                                                             | 7,8                                    |
| Outcomes                   | 6    | Clearly defined primary and secondary outcome measures and, when applicable, any methods used to enhance the quality of measurements (e.g., multiple observations, training of assessors) |                                                                                                                                                                             | 12                                     |
| Sample size†               | 7    | How sample size was determined and, when applicable, explanation of any interim analyses and stopping rules                                                                               | When applicable, details of whether and how the clustering by care providers or centers was addressed                                                                       | 14                                     |

|    |                                        |             |                                                                                                                                                                                                                                                                                                                                                             |                                                                                                                                                                       |
|----|----------------------------------------|-------------|-------------------------------------------------------------------------------------------------------------------------------------------------------------------------------------------------------------------------------------------------------------------------------------------------------------------------------------------------------------|-----------------------------------------------------------------------------------------------------------------------------------------------------------------------|
| 1  |                                        |             |                                                                                                                                                                                                                                                                                                                                                             |                                                                                                                                                                       |
| 2  |                                        |             |                                                                                                                                                                                                                                                                                                                                                             |                                                                                                                                                                       |
| 3  |                                        |             |                                                                                                                                                                                                                                                                                                                                                             |                                                                                                                                                                       |
| 4  |                                        |             |                                                                                                                                                                                                                                                                                                                                                             |                                                                                                                                                                       |
| 5  | Randomization–<br>sequence generation† | 8           | Method used to generate the random allocation<br>sequence, including details of any restriction<br>(e.g., blocking, stratification)                                                                                                                                                                                                                         | When applicable, how care providers were<br>allocated to each trial group                                                                                             |
| 6  |                                        |             |                                                                                                                                                                                                                                                                                                                                                             |                                                                                                                                                                       |
| 7  |                                        |             |                                                                                                                                                                                                                                                                                                                                                             |                                                                                                                                                                       |
| 8  | Allocation concealment                 | 9           | Method used to implement the random<br>allocation sequence (e.g., numbered containers<br>or central telephone), clarifying whether the<br>sequence was concealed until interventions<br>were assigned                                                                                                                                                       | 9                                                                                                                                                                     |
| 9  |                                        |             |                                                                                                                                                                                                                                                                                                                                                             |                                                                                                                                                                       |
| 10 |                                        |             |                                                                                                                                                                                                                                                                                                                                                             |                                                                                                                                                                       |
| 11 |                                        |             |                                                                                                                                                                                                                                                                                                                                                             |                                                                                                                                                                       |
| 12 | Implementation                         | 10          | Who generated the allocation sequence, who<br>enrolled participants, and who assigned<br>participants to their groups                                                                                                                                                                                                                                       | 9                                                                                                                                                                     |
| 13 |                                        |             |                                                                                                                                                                                                                                                                                                                                                             |                                                                                                                                                                       |
| 14 |                                        |             |                                                                                                                                                                                                                                                                                                                                                             |                                                                                                                                                                       |
| 15 | Blinding (masking)†                    | 11A         | Whether or not participants, those<br>administering the interventions, and those<br>assessing the outcomes were blinded to group<br>assignment                                                                                                                                                                                                              | Whether or not those administering co-<br>interventions were blinded to group assignment                                                                              |
| 16 |                                        |             |                                                                                                                                                                                                                                                                                                                                                             |                                                                                                                                                                       |
| 17 |                                        |             |                                                                                                                                                                                                                                                                                                                                                             |                                                                                                                                                                       |
| 18 |                                        |             |                                                                                                                                                                                                                                                                                                                                                             |                                                                                                                                                                       |
| 19 |                                        |             |                                                                                                                                                                                                                                                                                                                                                             |                                                                                                                                                                       |
| 20 |                                        | 11B         |                                                                                                                                                                                                                                                                                                                                                             | If blinded, method of blinding and description of<br>the similarity of interventions†                                                                                 |
| 21 |                                        |             |                                                                                                                                                                                                                                                                                                                                                             |                                                                                                                                                                       |
| 22 | Statistical methods†                   | 12          | Statistical methods used to compare groups for<br>primary outcome(s); methods for additional<br>analyses, such as subgroup analyses and<br>adjusted analyses                                                                                                                                                                                                | When applicable, details of whether and how the<br>clustering by care providers or centers was<br>addressed                                                           |
| 23 |                                        |             |                                                                                                                                                                                                                                                                                                                                                             |                                                                                                                                                                       |
| 24 |                                        |             |                                                                                                                                                                                                                                                                                                                                                             |                                                                                                                                                                       |
| 25 |                                        |             |                                                                                                                                                                                                                                                                                                                                                             |                                                                                                                                                                       |
| 26 | <b>Results</b>                         |             |                                                                                                                                                                                                                                                                                                                                                             |                                                                                                                                                                       |
| 27 | Participant flow†                      | 13          | Flow of participants through each stage (a<br>diagram is strongly recommended)---<br>specifically, for each group, report the numbers<br>of participants randomly assigned, receiving<br>intended treatment, completing the study<br>protocol, and analyzed for the primary<br>outcome; describe deviations from study as<br>planned, together with reasons | The number of care providers or centers<br>performing the intervention in each group and<br>the number of patients treated by each care<br>provider or in each center |
| 28 |                                        |             |                                                                                                                                                                                                                                                                                                                                                             |                                                                                                                                                                       |
| 29 |                                        |             |                                                                                                                                                                                                                                                                                                                                                             |                                                                                                                                                                       |
| 30 |                                        |             |                                                                                                                                                                                                                                                                                                                                                             |                                                                                                                                                                       |
| 31 |                                        |             |                                                                                                                                                                                                                                                                                                                                                             |                                                                                                                                                                       |
| 32 |                                        |             |                                                                                                                                                                                                                                                                                                                                                             |                                                                                                                                                                       |
| 33 |                                        |             |                                                                                                                                                                                                                                                                                                                                                             |                                                                                                                                                                       |
| 34 |                                        |             |                                                                                                                                                                                                                                                                                                                                                             |                                                                                                                                                                       |
| 35 | Implementation of<br>intervention†     | New<br>item |                                                                                                                                                                                                                                                                                                                                                             | Details of the experimental treatment and<br>comparator as they were implemented                                                                                      |
| 36 |                                        |             |                                                                                                                                                                                                                                                                                                                                                             |                                                                                                                                                                       |
| 37 | Recruitment                            | 14          | Dates defining the periods of recruitment and<br>follow-up                                                                                                                                                                                                                                                                                                  | 10,15,16 Appendix<br>p..5,<br>11,15                                                                                                                                   |
| 38 |                                        |             |                                                                                                                                                                                                                                                                                                                                                             |                                                                                                                                                                       |
| 39 | Baseline data†                         | 15          | Baseline demographic and clinical<br>characteristics of each group                                                                                                                                                                                                                                                                                          | When applicable, a description of care providers<br>(case volume, qualification, expertise, etc.) and<br>centers (volume) in each group                               |
| 40 |                                        |             |                                                                                                                                                                                                                                                                                                                                                             |                                                                                                                                                                       |
| 41 |                                        |             |                                                                                                                                                                                                                                                                                                                                                             |                                                                                                                                                                       |
| 42 |                                        |             |                                                                                                                                                                                                                                                                                                                                                             |                                                                                                                                                                       |
| 43 |                                        |             |                                                                                                                                                                                                                                                                                                                                                             |                                                                                                                                                                       |
| 44 |                                        |             |                                                                                                                                                                                                                                                                                                                                                             |                                                                                                                                                                       |
| 45 |                                        |             |                                                                                                                                                                                                                                                                                                                                                             |                                                                                                                                                                       |
| 46 |                                        |             |                                                                                                                                                                                                                                                                                                                                                             |                                                                                                                                                                       |
| 47 |                                        |             |                                                                                                                                                                                                                                                                                                                                                             |                                                                                                                                                                       |
| 48 |                                        |             |                                                                                                                                                                                                                                                                                                                                                             |                                                                                                                                                                       |
| 49 |                                        |             |                                                                                                                                                                                                                                                                                                                                                             |                                                                                                                                                                       |

|                         |    |                                                                                                                                                                                                           |                                                                                                                                                                       |          |
|-------------------------|----|-----------------------------------------------------------------------------------------------------------------------------------------------------------------------------------------------------------|-----------------------------------------------------------------------------------------------------------------------------------------------------------------------|----------|
| Numbers analyzed        | 16 | Number of participants (denominator) in each group included in each analysis and whether analysis was by “intention-to-treat”; state the results in absolute numbers when feasible (e.g., 10/20, not 50%) |                                                                                                                                                                       | 15,16    |
| Outcomes and estimation | 17 | For each primary and secondary outcome, a summary of results for each group and the estimated effect size and its precision (e.g., 95% confidence interval)                                               |                                                                                                                                                                       | 15 to 20 |
| Ancillary analyses      | 18 | Address multiplicity by reporting any other analyses performed, including subgroup analyses and adjusted analyses, indicating those prespecified and those exploratory                                    |                                                                                                                                                                       | 20       |
| Adverse events          | 19 | All important adverse events or side effects in each intervention group                                                                                                                                   |                                                                                                                                                                       | 20       |
| <b>Discussion</b>       |    |                                                                                                                                                                                                           |                                                                                                                                                                       |          |
| Interpretation†         | 20 | Interpretation of the results, taking into account study hypotheses, sources of potential bias or imprecision, and the dangers associated with multiplicity of analyses and outcomes                      | In addition, take into account the choice of the comparator, lack of or partial blinding, and unequal expertise of care providers or centers in each group            | 21       |
| Generalizability†       | 21 | Generalizability (external validity) of the trial findings                                                                                                                                                | Generalizability (external validity) of the trial findings according to the intervention, comparators, patients, and care providers and centers involved in the trial | 22       |
| Overall evidence        | 22 | General interpretation of the results in the context of current evidence                                                                                                                                  |                                                                                                                                                                       | 22 to 26 |

\*Additions or modifications to the CONSORT checklist. CONSORT = Consolidated Standards of Reporting Trials.

†This item was modified in the 2007 revised version of the CONSORT checklist.



**A novel oral nutraceutical formula (PLP10) for the treatment of relapsing remitting multiple sclerosis: a randomized, double-blind, placebo-controlled proof-of-concept clinical trial.**

|                                 |                                                                                                                                                                                                                                                                                                                                                                                                                                                                                                                                                   |
|---------------------------------|---------------------------------------------------------------------------------------------------------------------------------------------------------------------------------------------------------------------------------------------------------------------------------------------------------------------------------------------------------------------------------------------------------------------------------------------------------------------------------------------------------------------------------------------------|
| Journal:                        | <i>BMJ Open</i>                                                                                                                                                                                                                                                                                                                                                                                                                                                                                                                                   |
| Manuscript ID:                  | bmjopen-2012-002170.R3                                                                                                                                                                                                                                                                                                                                                                                                                                                                                                                            |
| Article Type:                   | Research                                                                                                                                                                                                                                                                                                                                                                                                                                                                                                                                          |
| Date Submitted by the Author:   | 05-Mar-2013                                                                                                                                                                                                                                                                                                                                                                                                                                                                                                                                       |
| Complete List of Authors:       | Pantzaris, Marios; The Cyprus Institute of Neurology and Genetics (CING), Clinic C and PALUPA Medical Ltd<br>Loukaides, George; The Cyprus Institute of Neurology and Genetics (CING), Neurology Clinic and PALUPA Medical Ltd<br>Ntzani, Evangelia; University of Ioannina School of Medicine (UISM), Clinical and Molecular Epidemiology Unit, Department of Hygiene and Epidemiology<br>Patrikios, Ioannis; The Cyprus Institute of Neurology and Genetics (CING), Clinic C and PALUPA Medical Ltd; European University Cyprus, Health Science |
| <b>Primary Subject Heading</b>: | Nutrition and metabolism                                                                                                                                                                                                                                                                                                                                                                                                                                                                                                                          |
| Secondary Subject Heading:      | Neurology, Complementary medicine, Pharmacology and therapeutics                                                                                                                                                                                                                                                                                                                                                                                                                                                                                  |
| Keywords:                       | Multiple sclerosis < NEUROLOGY, NUTRITION & DIETETICS, Neurophysiology < NEUROLOGY, COMPLEMENTARY MEDICINE, Neurobiology < BASIC SCIENCES, PUBLIC HEALTH                                                                                                                                                                                                                                                                                                                                                                                          |
|                                 |                                                                                                                                                                                                                                                                                                                                                                                                                                                                                                                                                   |

SCHOLARONE™  
Manuscripts



1 **A novel oral nutraceutical formula of omega-3 and omega-**  
2 **6 fatty acids with vitamins (PLP10) in relapsing remitting**  
3 **multiple sclerosis: a randomised, double-blind, placebo-**  
4 **controlled proof-of-concept clinical trial**

5 **Marios C. Pantzaris\***, **George N. Loukaides**, **Evangelia E. Ntzani**, **Ioannis**  
6 **S. Patrikios\***

7 \* Both M.C.P and I.S.P are the first authors and both are the corresponding authors

8  
9 The Cyprus Institute of Neurology and Genetics (CING) 1683 Nicosia, Cyprus Marios C.  
10 Pantzaris Senior Consultant Neurologist Neurology Clinic C and PALUPA Medical Ltd., The  
11 Cyprus Institute of Neurology and Genetics (CING) 1683 Nicosia, Cyprus George N.  
12 Loukaides Clinical Dietitian/Nutritionist Neurology Clinic and PALUPA Medical Ltd.,  
13 University of Ioannina School of Medicine (UISM) 45110 Ioannina, Greece Evangelia E.  
14 Ntzani Assistant Professor Clinical and Molecular Epidemiology Unit, Department of  
15 Hygiene and Epidemiology, PALUPA Medical Ltd at The Cyprus Institute of Neurology and  
16 Genetics (CING) 1683 Nicosia, Cyprus Ioannis S. Patrikios Senior Research Scientist,  
17 visiting Professor at European University Cyprus Nicosia, Cyprus, Department of Health and  
18 Science. Correspondence should be addresses to e-mail: [I.Patrikios@euc.ac.cy](mailto:I.Patrikios@euc.ac.cy) or  
19 [pantzari@cing.ac.cy](mailto:pantzari@cing.ac.cy)

1  
2  
3 22 **Correspondence to:**  
4

5 23 **Ioannis Patrikios**

6  
7 24 The Cyprus Institute of Neurology and Genetics (CING)

8  
9 25 Neurology Clinic C (PALUPA Medical),

10  
11 26 6 International Airport Av.

12  
13 27 P.O. Box 23462, 1683 Ayios Dometios. Nicosia, Cyprus

14  
15 28 Tel: +357 22 358 600, +357 99 097 856;

16  
17 29 [i.patrikios@euc.ac.cy](mailto:i.patrikios@euc.ac.cy)

18  
19 30 [patrikiosioannis@gmail.com](mailto:patrikiosioannis@gmail.com)  
20  
21  
22  
23  
24  
25  
26  
27  
28  
29  
30  
31

32 **AND**

33  
34 **Marios Pantzaris**

35 The Cyprus Institute of Neurology and Genetics (CING)

36 Neurology Clinic C (PALUPA Medical),

37 6 International Airport Av.

38 P.O. Box 23462, 1683 Ayios Dometios, Nicosia Cyprus

39 Tel: +357 22 358 600; +357 99 677 067

40 [pantzari@cing.ac.cy](mailto:pantzari@cing.ac.cy)  
41  
42  
43  
44  
45  
46  
47  
48  
49  
50  
51  
52  
53  
54  
55  
56  
57  
58  
59  
60

42 **Keywords:** antioxidant vitamins, polyunsaturated fatty acids, multiple sclerosis, systems  
43 medicine, randomised clinical trial.

45 **Word Count: 5915**

1  
2  
3 46 **Abstract**  
4

5 47 **Objective** To assess whether three novel interventions, formulated based on a systems  
6  
7  
8 48 medicine therapeutic concept, reduced disease activity in patients with relapsing remitting  
9  
10 49 multiple sclerosis who were either treated or not with disease-modifying treatment.  
11

12  
13  
14 51 **Design** A 30-month randomised, double-blind, placebo-controlled, parallel design, phase II  
15  
16  
17 52 proof-of-concept clinical study.  
18

19  
20  
21 54 **Settings** Cyprus Institute of Neurology and Genetics (CING)  
22  
23  
24 55

25  
26 56 **Participants and Interventions** Eighty subjects were randomised into four groups of twenty.  
27  
28 57 The first intervention (A) was composed of omega-3 and omega-6 polyunsaturated fatty acids  
29  
30 58 at 1:1 wt/wt. Specifically, the omega-3 fatty acids were docosahexaenoic acid (DHA) and  
31  
32 59 eicosapentaenoic acid (EPA) at 3:1 wt/wt, and the omega-6 fatty acids were linoleic acid  
33  
34 60 (LA) and gamma ( $\gamma$ )-linolenic acid (GLA) at 2:1 wt/wt. This intervention also included minor  
35  
36 61 quantities of other specific polyunsaturated, monounsaturated and saturated fatty acids as  
37  
38 62 well as vitamin A and vitamin E (alpha-tocopherol). The second intervention (B, PLP10) was  
39  
40 63 a combination of A and  $\gamma$ -tocopherol. The third intervention (C) was  $\gamma$ -tocopherol alone. A  
41  
42 64 fourth group of 20 received placebo. The interventions were administered per os (by mouth)  
43  
44 65 once daily.  
45  
46  
47  
48  
49

50 67 **Main outcome measures** The primary endpoint was the annualised relapse rate (ARR) of the  
51  
52 68 three interventions versus the placebo at two years. The secondary end point was the time to  
53  
54 69 confirmed disability progression at two years.  
55  
56  
57  
58  
59  
60

1  
2  
3 71 **Results** A total of 41 (51%) patients completed the 30-month trial. Overall, for the per-  
4  
5 72 protocol analysis of the two-year primary end point, 8 relapses were recorded in the PLP10  
6  
7 73 group (n=10) (0.40 ARR) versus 25 relapses in the placebo group (n=12) (1.04 ARR),  
8  
9 74 representing a 64% adjusted relative rate reduction for the PLP10 group (RRR 0.36, 95% CI  
10  
11 75 0.15 to 0.87, p=0.024). In a subgroup analysis that excluded patients on monoclonal antibody  
12  
13 76 (natalizumab) treatment, the observed adjusted RRR became stronger (72%) over the two  
14  
15 77 years (RRR 0.28, 95% CI 0.10 to 0.79, p=0.016). The per-protocol analysis for the secondary  
16  
17 78 outcome at two years, the time to disability progression, was significantly longer only for  
18  
19 79 PLP10. The cumulative probability of disability progression at two years was 10% in the  
20  
21 80 PLP10 group and 58% in the placebo group (unadjusted log-rank p=0.019). In a subgroup  
22  
23 81 analysis that excluded patients on natalizumab, the cumulative probability of progression was  
24  
25 82 10% for the 10 patients in the PLP10 group and 70% for the 12 patients in the placebo group,  
26  
27 83 representing a relative 86% decrease in the risk of the sustained progression of disability in  
28  
29 84 the PLP10 group (unadjusted log-rank p=0.006; adjusted hazard ratio, 0.11; 95% CI 0.01 to  
30  
31 85 0.97, p=0.047). No adverse events were reported. Interventions A (10 patients) and C (9  
32  
33 86 patients) showed no significant efficacy.  
34  
35  
36  
37  
38  
39  
40  
41  
42  
43  
44  
45  
46  
47  
48  
49  
50  
51  
52  
53  
54  
55  
56  
57  
58  
59  
60

87  
88 **Conclusions** In this small proof-of-concept, randomised, double-blind clinical trial; the  
89  
90 PLP10 treatment significantly reduced the ARR and the risk of sustained disability  
91  
92 progression without any reported serious adverse events. Larger studies are needed to further  
93  
94 assess the safety and efficacy of PLP10.  
95

93 **Trial registration** International Standard Randomised Controlled Trial, number  
94  
95 ISRCTN87818535.

## 96 Introduction

97 Multiple sclerosis (MS) is a complex multifactorial disease that results from the interplay  
98 between environmental factors and a susceptible genetic background.<sup>1-3</sup> Together, these  
99 factors trigger a cascade of events involving the engagement of the immune system,  
100 inflammatory injury of myelin, axons and glia, functional recovery and structural repair,  
101 gliosis, and neurodegeneration.<sup>4</sup> The mechanisms involved include immune-mediated  
102 inflammation, oxidative stress and excitotoxicity, all of which contribute to oligodendrocyte  
103 and neuronal damage and even cell death, hence promoting disease progression.<sup>5-9</sup> The  
104 increasing prevalence of MS combined with the partial efficacy and side effects of the  
105 existing treatments have urged the development of new, innovative, more effective, safe, and  
106 preventive treatment strategies.

107  
108 Recent research has shown that multiple variables dynamically interact and many different  
109 complex interrelated processes are simultaneously orchestrated for MS pathogenesis. The  
110 uniqueness of systems medicine (SM) is the recognition that different specific complex  
111 factors are important in disease management and that these factors need to be incorporated in  
112 some meaningful way for treatment selection and delivery.<sup>10</sup> The primary challenge of a  
113 systems scientific approach is the elucidation of how these multiple variables dynamically  
114 interact and how this understanding can be applied to affect the system and achieve a  
115 desirable end.<sup>10 11</sup> One approach towards that end might be the simultaneous intervention in  
116 multiple involved pathways using a combination of different active ingredients that could  
117 exert a synergistic effect and provide a comprehensive, sustainable treatment effect  
118 (Supplementary Information Methods 1).

119

1  
2  
3 120 The polyunsaturated fatty acid (PUFA) composition of membrane phospholipids plays an  
4  
5 121 important role in immune- and non-immune-related inflammation. PUFA and antioxidant  
6  
7 122 deficiencies along with a decreased cellular antioxidant defence mechanisms have been  
8  
9  
10 123 reported in MS patients.<sup>12-15</sup> The cause of PUFA deficiencies is not entirely clear and may  
11  
12 124 involve metabolic and nutritional alterations.<sup>12</sup>

13  
14  
15  
16 126 Increased or uncontrolled inflammation contributes to several different acute and chronic  
17  
18 127 diseases, and it is characterised by the production of inflammatory cytokines, arachidonic  
19  
20 128 acid (AA)-derived eicosanoids (prostaglandins [PGs], thromboxanes [TXs], leukotrienes  
21  
22 129 [LTs], and other oxidised derivatives), and other inflammatory agents such as reactive  
23  
24  
25 130 oxygen species (ROS), nitric oxide (NO), and adhesion molecules (Fig 2).<sup>16</sup> During  
26  
27 131 inflammation, glutamate homeostasis is altered by the release of increased quantities of  
28  
29 132 glutamate by activated immune cells, which can result in the over-activation of glutamate  
30  
31 133 receptors and, in turn, excitotoxic oligodendroglial death.<sup>7 17</sup> Among others, membrane-  
32  
33 134 related pathology, immune-mediated inflammation, oxidative stress, and excitotoxicity  
34  
35 135 provide potentially useful combined targets for intervention in MS.

36  
37  
38  
39  
40  
41 137 *In vitro* and *in vivo* studies have demonstrated that dietary eicosapentaenoic acid (EPA),  
42  
43 138 docosahexaenoic acid (DHA), linoleic acid (LA), and gamma ( $\gamma$ )-linolenic acid (GLA) can be  
44  
45 139 implicated and modulate almost all known complex networks of events and pathways in MS  
46  
47 140 pathophysiology. The brain membrane fatty acid composition can be modified with dietary  
48  
49 141 supplementation, but the process has been shown to be age dependent (taking much longer in  
50  
51 142 adults versus developing brains) and possibly dependent on the quantity of the  
52  
53 143 dietary/supplemented PUFAs.<sup>18</sup> Both human and animal studies proved that diets high in  
54  
55 144 DHA and EPA can increase the proportion of these PUFAs in the membranes of  
56  
57  
58  
59  
60

1  
2  
3 145 inflammatory cells and also reduce the levels of AA, a stress-related biomarker.<sup>16 19</sup> The anti-  
4  
5 146 inflammatory properties of omega-3PUFAs include the production of PGs and TXs of the 3-  
6  
7 147 series and LTs of the 5-series (Fig 2).<sup>18 20</sup> Resolvins and protectins are biosynthesised from  
8  
9 148 omega-3 fatty acids via cyclooxygenase-2/lipoxygenase (COX-2/LOX) pathways, and they  
10  
11 149 promote the control of inflammation in neural tissues (Fig 2).<sup>21-25</sup> T-cell proliferation in acute  
12  
13  
14 150 and chronic inflammation can also be reduced by supplementation with either omega-6 or  
15  
16 151 omega-3 PUFAs.<sup>26</sup> Furthermore, vitamin E is an important antioxidant that can interrupt the  
17  
18 152 propagation of free radical chain reactions.<sup>27</sup> Specifically, vitamin E (alpha-tocopherol, an  
19  
20 153 isoform of vitamin E) efficiently detoxifies hydroxyl, perhydroxyl and superoxide free  
21  
22 154 radicals, whereas  $\gamma$ -tocopherol (another isoform of vitamin E) appears to be more efficiently  
23  
24 155 implicated in trapping NO radicals.<sup>28 29</sup> In addition, alpha-tocopherol exerts non-antioxidant  
25  
26 156 properties, including the modulation of cell signalling and immune functions, regulation of  
27  
28 157 transcription, and induction of apoptosis.<sup>30</sup>  
29  
30  
31  
32 158  
33  
34 159 Moreover, omega-3 fatty acid electrophilic derivatives formed by COX-2 in activated  
35  
36 160 macrophages can stimulate the nuclear respiratory factor (Nrf2), which induces the  
37  
38 161 transcription of neuroprotective and antioxidant-related genes and can activate the  
39  
40 162 peroxisome proliferator-activated receptor (PPAR) $\gamma$  for an anti-inflammatory response.<sup>31-34</sup> In  
41  
42 163 animal studies, EPA and DHA proved to be endogenous ligands of RXRs, with positive  
43  
44 164 effects on neurogenesis.<sup>35</sup> Additionally, in 2008, Salvati and coworkers reported evidence of  
45  
46 165 accelerated myelination in DHA- and EPA-treated animals.<sup>36</sup> Moreover, DHA and EPA have  
47  
48 166 been reported to significantly decrease the levels of metalloproteinases (MMP) -2, -3, -9, and  
49  
50 167 -13, which have a significant role in the migration of lymphocytes into the central nervous  
51  
52 168 system (CNS) by inducing the disruption of the blood brain barrier (BBB), an important step  
53  
54 169 in the formation of MS lesions.<sup>37-43</sup>  
55  
56  
57  
58  
59  
60

1  
2  
3 170  
4  
5 171 Based on the above observations, specific PUFAs and antioxidant vitamins fulfil the criterion  
6  
7 172 of biologic plausibility and have the potential to diminish the severity and activity of MS  
8  
9 173 symptoms, potentially even promoting recovery (remyelination).<sup>12 44</sup>

10  
11 174  
12  
13  
14 175 We report here a randomised phase II, single-centre, double-blind, placebo-controlled, proof-  
15  
16 176 of-concept clinical trial evaluating the therapeutic ability of a nutraceutical formula (with  
17  
18 177 PLP10 representing the complete composition of the formulation) and of two other  
19  
20 178 interventions (A and C) consisting of PLP10-constituent partial fractions containing  
21  
22 179 ingredients for the aforementioned substance categories on relapsing remitting (RR) MS  
23  
24 180 patients.

25  
26  
27 181

28  
29  
30 182

## 31 32 183 **Methods**

### 33 34 184 **Patients**

35  
36  
37 185 The eligibility criteria were an age of 18 to 65; a diagnosis of RRMS according to the  
38  
39 186 McDonald criteria; a score of 0.0 to 5.5 on the Expanded Disability Status Scale (EDSS), a  
40  
41 187 rating that ranges from 0 to 10, with higher scores indicating more severe disability; MRI  
42  
43 188 showing lesions consistent with MS; at least one documented clinical relapse; and either  
44  
45 189 receiving or not a disease-modifying treatment (DMT) within the 24 month period before  
46  
47 190 enrolment in the study. Patients were excluded because of a recent (<30 days) relapse, prior  
48  
49 191 immunosuppressant or monoclonal antibody therapy, pregnancy or nursing, other severe  
50  
51 192 disease compromising organ function, progressive MS, history of recent drug or alcohol  
52  
53 193 abuse, use of any additional food supplements, vitamins, or any form of PUFA, and history of  
54  
55 194 severe allergic or anaphylactic reactions or known specific nutritional hypersensitivity. No  
56  
57  
58  
59  
60



1  
2  
3 195 monitoring or limitations on the patients' daily dietary habits were considered because the  
4  
5 196 high quantities of the ingredients within the formula could not be significantly affected by  
6  
7 197 any particular dietary pattern.  
8

9  
10 198

11 199 The study was conducted in accordance with the standards of the International Conference of  
12  
13  
14 200 Harmonisation Guidelines for Good Clinical Practice. The protocol was developed by the  
15  
16 201 investigators, approved by the Cyprus National Bioethics Committee, and overseen by an  
17  
18 202 independent safety-monitoring committee evaluating the safety and over-all benefit-risk  
19  
20 203 profiles. The adherence of the care providers with the protocol was assessed by an external  
21  
22  
23 204 committee assigned by the funder of the project through reviews of case report forms. All  
24  
25 205 patients gave written informed consent at the time of enrolment.  
26

27 206

### 28 29 207 **Randomisation and masking**

30  
31 208 Patients were randomly assigned to four intervention groups in a 1:1:1:1 ratio stratified by  
32  
33 209 gender (women to men, 3:1). Randomisation was facilitated by a lottery-type pool of  
34  
35 210 numbered balls. Patients were randomly assigned to the treatments in blocks of four by  
36  
37 211 flipping a coin as follows: for the first two drawn balls, heads stratified them to the groups  
38  
39 212 A/B and tails stratified them to the groups C/D. The other two balls were stratified  
40  
41 213 accordingly. A second toss of the coin assigned the two patients to group A (head)/B (tail) or  
42  
43 214 to group C (head)/D (tail). The randomisation scheme was generated, performed and securely  
44  
45 215 stored by the Helix Incubator Organization of Nicosia University (HIONU).  
46  
47

48 216

49  
50  
51 217 The interventions had identical appearances and smells and were kept in dark bottles (15  
52  
53 218 daily-dose portions/bottle) under a nitrogen bed and labelled by HIONU with code numbers,  
54  
55 219 blinded for both the patients and investigators. Study data were collected by the investigators  
56  
57  
58  
59  
60

1  
2  
3 220 and saved by HIONU, which also held the blinded codes for the study. All study personnel  
4  
5 221 involved in the conduct of the study were blinded throughout the study. The  
6  
7 222 treating/examining physician, other investigators, pharmacist, neuroradiologist and patients  
8  
9 223 were masked to the treatment allocation.  
10  
11  
12 224

### 14 225 **Procedures and end points**

16 226 The specific omega-3 and omega-6 raw materials were purchased according to the required  
17  
18 227 interventions' PUFA-fraction specification (molecular structure, quantity/ratio and quality)  
19  
20 228 with vitamin E (alpha-tocopherol) used as antioxidant stabiliser by the supplier. The vitamins  
21  
22 229 and masking aroma were purchased separately. The mixing of the fractions to the final  
23  
24 230 required intervention-composition specification was always performed by the same team of  
25  
26 231 scientists under the supervision of the involved medical biochemist and lipidology specialist  
27  
28 232 and under appropriate conditions every six months. The interventions were refrigerated in the  
29  
30 233 dark until use. See Table 1 and Supplementary Information Methods 1 and 2 for a detailed  
31  
32 234 description of the interventions.  
33  
34  
35  
36 235

38 236 The participants were randomly assigned to receive the following: group A, a daily dose of a  
39  
40 237 19.5 ml mixture of EPA (1,650 mg) / DHA (4,650 mg) / GLA (2,000 mg) / LA (3,850 mg) /  
41  
42 238 total other omega-3 (600 mg) / total MUFA (1,714 mg) + total SFA (18:0 160 mg and 16:0  
43  
44 239 650 mg) / vitamin A (0.6 mg) / vitamin E (22 mg) plus citrus-aroma (intervention A); group  
45  
46 240 B (PLP10), a daily dose of a 19.5 ml mixture of EPA (1,650 mg) / DHA (4,650 mg) / GLA  
47  
48 241 (2,000 mg) / LA (3,850 mg) / total other omega-3 (600 mg) / total MUFA (1,714 mg) + total  
49  
50 242 SFA (18:0 160 mg and 16:0 650 mg) / vitamin A (0.6 mg) / vitamin E (22 mg) plus pure  $\gamma$ -  
51  
52 243 tocopherol (760 mg) plus citrus-aroma (intervention B); group C, a daily dose of a 19.5 ml  
53  
54 244 mixture of pure  $\gamma$ -tocopherol (760 mg) dispersed in pure virgin olive oil (16,137 mg) plus  
55  
56  
57  
58  
59  
60

1  
2  
3 245 citrus-aroma (intervention C); and group D (placebo), a daily dose of a 19.5 ml mixture of  
4  
5 246 pure virgin olive oil (16,930 mg) plus citrus-aroma (intervention D) (Table 1). The  
6  
7 247 pharmacist of the institution was responsible for the appropriate storage and handling of the  
8  
9 248 interventions for the individual participants. The interventions were taken orally once daily  
10  
11 249 30 minutes before dinner using a dosage-calibrated cup for 30 months. The ingredients, ratio  
12  
13 250 and dose were selected based on their biophysical interrelationship with the total known  
14  
15 251 multiple MS causative factors, their biochemical importance and the role they were expected  
16  
17 252 to play in the normalisation and treatment of the involved complex network of events in the  
18  
19 253 disease pathophysiology. Moreover, the high intervention dosage was selected with the aim  
20  
21 254 of optimising the body composition of omega-3 to omega-6 PUFAs to a 1:1 wt/wt ratio  
22  
23 255 irrespective of dietary habits and geographical origin.  
24  
25  
26  
27  
28

29  
30 257 The period from July 1<sup>st</sup> 2007 (enrolment) to December 31<sup>st</sup> 2007 was used as the  
31  
32 258 normalisation period. This six-month normalisation period would allow the interventions to  
33  
34 259 exert their beneficial effect as oral PUFAs need four to six months to achieve pivotal action  
35  
36 260 on immune and neural cells, correction of antioxidant deficiencies and body PUFA  
37  
38 261 redistribution, and an optimal normalisation of the EPA and DHA ratio.<sup>45-47</sup> The study was  
39  
40 262 completed on December 31<sup>st</sup> 2009 (30 months), and the recording of relapses continued until  
41  
42 263 December 31<sup>st</sup> 2010 (42 months). Overall, the study included a “normalisation period” (July  
43  
44 264 1<sup>st</sup> 2007 to Dec 31<sup>st</sup> 2007), an “on treatment” period (Jan 1<sup>st</sup> 2008, the baseline, to Dec 31<sup>st</sup>  
45  
46 265 2009) and a 12-month “post-study monitoring period” (Jan 1<sup>st</sup> 2010 to Dec 31<sup>st</sup> 2010).  
47  
48  
49

50  
51  
52 267 Depending on their clinical status and in accordance with common practice, the participants  
53  
54 268 continued receiving their indicated regular treatment, with persistent evaluation for any side-  
55  
56 269 effects and adverse events. Clinical assessment visits were scheduled at baseline and 3, 9, 15,  
57  
58  
59  
60

1  
2  
3 270 21 and 24 months on-treatment. The patients were also clinically examined by the treating  
4  
5 271 neurologist within 48 hours after the onset of new or recurrent neurologic symptoms.  
6  
7 272

8  
9 273 The primary end point was the ARR at two years. A relapse was defined as new or recurrent  
10  
11 274 neurologic symptoms not associated with fever or infection that lasted for at least 24 hours  
12  
13 275 and was accompanied by new neurologic signs. Relapses were treated with methyl-  
14  
15 276 prednisolone at a dose of 1 g intravenous per day for three days, followed by prednisone  
16  
17 277 orally at a dose of 1 mg/kg of weight per day on a tapering scheme for three weeks. The  
18  
19 278 secondary end point at two years was the time to disability progression, defined as an  
20  
21 279 increase of 1.0 or more on the EDSS and confirmed after six months. Progression could not  
22  
23 280 be confirmed during a relapse, and the final EDSS score was confirmed six months after the  
24  
25 281 end of the study. A post-hoc analysis was performed to assess the proportion of patients free  
26  
27 282 from new or enlarging T2 lesions on brain MRI scans at the end of the study for the per-  
28  
29 283 protocol participants of the group receiving the most effective intervention versus placebo.  
30  
31 284 This comparison was made versus the available archival MRI scans up to three months before  
32  
33 285 the enrolment date. The MRI scans were performed and blindly analysed at an MRI  
34  
35 286 evaluation centre. The patients were monitored for an additional 12 months after completion  
36  
37 287 of the trial, and relapses were recorded. The patients were strongly encouraged to remain in  
38  
39 288 the study for follow-up assessments even if they had discontinued the study drug.  
40  
41  
42  
43  
44  
45  
46

47 290 Blood samples were collected from all randomised patients at the time of enrolment, at every  
48  
49 291 scheduled clinical assessment and during relapses. To evaluate the compliance, the fatty acid  
50  
51 292 composition of the patients' red blood cell membranes was determined by gas  
52  
53 293 chromatography, according to a standard protocol. The fatty acid analyses were performed  
54  
55 294 after study termination and thus did not influence the blinding. Safety measures were  
56  
57  
58  
59  
60

1  
2  
3 295 assessed from the time of enrolment until 12 months following the study completion.  
4  
5 296 Haematological and biochemical tests were performed at enrolment and every 12 months,  
6  
7 297 including a full blood count, renal and liver function tests, and protein, cholesterol,  
8  
9 298 triglyceride, glucose and electrolyte levels.  
10

11 299

12  
13  
14 300 The involved neurologist was experienced with more than 20 years in practice. He was  
15  
16 301 trained to standardise the EDSS scoring procedures, examined the patients, made all medical  
17  
18 302 decisions, determined the EDSS score and reviewed the adverse effects or side effects. The  
19  
20 303 medical biochemist, who was a specialist in lipidology and immunology, and the registered  
21  
22 304 clinical dietitian were both members of the investigative team with more than 25 years of  
23  
24 305 experience in practice. The patients were able to contact the involved neurologist at any time  
25  
26 306 if there was any adverse event, side effect or allergic reaction. The study drug was not  
27  
28 307 expected to have any clinical or laboratory adverse effects different from those of the placebo  
29  
30 308 that could disturb the double-blind nature of the trial. Therefore, the study neurologist  
31  
32 309 functioned as both the treating and evaluating physician.  
33

34 310

35  
36  
37  
38 311 The whole procedure followed the clinical trial guidelines as required by the USA Food and  
39  
40 312 Drug Administration, European Medicines Agency, and the Committee for Medicinal  
41  
42 313 Products for Human Use.<sup>48</sup>  
43

44 314

#### 45 315 **Statistical analysis**

46  
47  
48 316 Power calculations could not be performed before the study because of the lack of  
49  
50 317 information from previous studies on the potential effect sizes. In 2005, the prevalence of MS  
51  
52 318 in Cyprus (600,000 population) was 120/100,000. Based on the aforementioned MS patient  
53  
54 319 numbers in our country and the reference centre, the CING, we were able to enrol 20% of the  
55  
56  
57  
58  
59  
60

1  
2  
3 320 total RRMS patients eligible for treatment. The sample size was strictly based on the  
4  
5 321 subjects' availability and the novelty of the assessed intervention.  
6  
7 322

8  
9 323 The baseline characteristics were compared across all intervention groups by ANOVA or the  
10  
11 324 Kruskal-Wallis rank test for continuous variables and by mean Fisher's exact test for  
12  
13 325 categorical variables, as appropriate.  
14  
15 326

16  
17 327 For the primary outcome, the ARR was analysed in a pair-wise fashion for the active  
18  
19 328 interventions compared with the placebo using negative binomial regression models adjusted  
20  
21 329 for the number of relapses within two years, the EDSS score at baseline and DMT. The  
22  
23 330 relapse rate was calculated as the total number of relapses divided by the total number of  
24  
25 331 patient-years followed for each treatment group. ARR differences were also calculated  
26  
27 332 among all comparable parameters and reported as the per-cent difference.  
28  
29 333

30  
31 334 For the secondary end-point, the time to disability progression, Kaplan–Meier curves were  
32  
33 335 constructed. The progression of disability and time thereof were compared in a pair-wise  
34  
35 336 fashion for the active interventions versus placebo by the log-rank test in the main analysis  
36  
37 337 and by the Cox proportional-hazards models with adjustments for the baseline EDSS score,  
38  
39 338 age and DMT in the supportive analysis. Multivariate models considered all variables with  $P$   
40  
41 339  $<0.1$  in the univariate models. There was no overt violation of the proportionality assumption.  
42  
43 340

44  
45 341 Both per-protocol and intention to treat (ITT) analyses were performed for different sets of  
46  
47 342 research questions to be answered, and both are reported. Missing data of the five patients  
48  
49 343 lost to follow-up were imputed by the last-observation-carried-forward (LOCF) approach.  
50  
51 344 Due to the proof-of-concept design of the study, the considerable non-adherence rate (49%)  
52  
53  
54  
55  
56  
57  
58  
59  
60

1  
2  
3 345 and the resulting interpretation issues regarding the ITT analysis, the per-protocol analysis  
4  
5 346 was considered to be the more informative and appropriate method to answer the research  
6  
7 347 questions addressing the efficacy of the interventions when the subjects continuously  
8  
9  
10 348 followed the protocol. All statistical analyses were well defined a priori. All analyses were  
11  
12 349 performed with STATA SE 10.0 (College Station, TX, USA). P-values were two-tailed.  
13

350

### 351 **Role of the funding source**

16  
17  
18 352 The funders had no role in the study design, data collection and analysis, decision to publish,  
19  
20 353 or preparation of the manuscript. All members of the writing group had full access to all  
21  
22 354 study data, contributed to its interpretation and prepared, reviewed, and approved the  
23  
24 355 manuscript for submission. All authors had the final responsibility for the decision to submit  
25  
26 356 the paper for publication.  
27  
28  
29

357

358

## 359 **Results**

### 360 **Study population**

38  
39 361 Among the 80 patients, 20 patients were randomly assigned to each of the three groups to  
40  
41 362 receive the interventions, and 20 to receive the placebo (Fig 1). The baseline characteristics  
42  
43 363 of both the ITT and per-protocol populations were similar across the groups (Table 2A and  
44  
45 364 2B). All patients who dropped out completed the follow-up until the study completion and  
46  
47 365 were included in the ITT analyses (Table 4). Five patients were lost to follow-up before their  
48  
49 366 first scheduled visit. Two other patients who dropped out before their first scheduled visit  
50  
51 367 progressed to secondary progressive MS. Fifteen patients dropped out without successfully  
52  
53 368 completing the “normalisation” period, including five pregnancies. Another 17 patients  
54  
55 369 dropped out early after the entry baseline. Seven patients who dropped out were given  
56  
57  
58  
59  
60

1  
2  
3 370 monoclonal antibody treatment (natalizumab). Overall, a total of 41 (51%) patients  
4  
5 371 completed the 42-month study, one patient from group A and two from the placebo group  
6  
7 372 transferred to natalizumab, and 39 (49%) patients either withdrew (dropped out) or were lost  
8  
9 373 to follow-up. The reasons for discontinuation are listed in Figure 2.  
10  
11

12 374

13  
14 375 **Efficacy**

15  
16 376 **Relapses**

17  
18 377 As a proof-of-concept trial, we primarily needed to answer whether the interventions were  
19  
20 378 effective for those patients who adhered to the assigned treatment, which was the per-  
21  
22 379 protocol analysis.<sup>49</sup> For methodological comprehensiveness, we also performed the ITT  
23  
24 380 analysis as a secondary analysis to answer different questions that were complementary to  
25  
26 381 our core hypothesis, such as what happened to all MS patients who were placed on the  
27  
28 382 interventions (the effect of assignment).<sup>49</sup>  
29  
30  
31

32 383

33  
34 384 In the per-protocol analysis, during the first year of the treatment, the ARR was 0.80, 0.40,  
35  
36 385 0.78 and 0.83 for the four intervention groups, respectively. During the second year, the ARR  
37  
38 386 was 0.90, 0.40, 0.67 and 1.25 for the four intervention groups, respectively. Overall, for the  
39  
40 387 two-year primary end point, 8 relapses were recorded for the 10 patients in the PLP10 group  
41  
42 388 (0.40 ARR) versus 25 relapses for the 12 patients on the placebo (1.04 ARR), a 64% adjusted  
43  
44 389 relative rate reduction (RRR) for the PLP10 group (RRR 0.36, 95% confidence interval [CI]  
45  
46 390 0.15 to 0.87, p=0.024) (Tables 3A, 5 and Fig 3A and 3C). After excluding patients on  
47  
48 391 monoclonal antibody (natalizumab) treatment, the observed adjusted RRR became stronger  
49  
50 392 (72%) over the two years (RRR 0.28, 95% CI 0.10 to 0.79, p=0.016, Tables 3B and 5). Pair-  
51  
52 393 wise comparisons for the other two groups against the placebo did not yield significant results  
53  
54 394 (Tables 3A, 3B). The proportion of patients with  $\leq 1$  relapse for the two years on-study was  
55  
56  
57  
58  
59  
60



1  
2  
3 395 higher in the PLP10 group than in the placebo group (90% versus 42%,  $p=0.030$ , Table 5).  
4  
5 396 Seeking to further investigate the observed difference, we compared the relapse rate during  
6  
7 397 the 24 months before the entry into the study to the 24 months on-treatment for each  
8  
9 398 intervention group. We observed a significant relative reduction in the ARR (70%) only in  
10  
11 399 the PLP10 group (RRR 0.30; 95% CI 0.14 to 0.65,  $p=0.003$ , Table 3A); within-group  
12  
13 400 comparisons for the ARR reduction of the three other groups were not significant and  
14  
15 401 remained not significant when the natalizumab-treated patients were further excluded from  
16  
17 402 the analysis. The effect of PLP10 through time at different time-windows versus placebo for  
18  
19 403 all-time on-study patients is shown in Figures 3A to 3D. Although the ARR analysis within  
20  
21 404 time-windows was not an assigned endpoint, it could help with the process of evaluating  
22  
23 405 parallel information, such as the efficacy profile through time. PLP10 reached its maximum  
24  
25 406 effect within one year on-treatment (counted from the entry baseline) and remained stable  
26  
27 407 afterwards at an ARR of 0.4 with some free-relapse time-windows. Figure 3D demonstrates  
28  
29 408 the dispersion of relapses throughout the 2-year period of all-time on-study (excluding  
30  
31 409 patients on natalizumab) for PLP10 ( $n=10$ ) versus placebo ( $n=10$ ). The placebo group, in line  
32  
33 410 with the existing knowledge of how the relapse history works in relation to future relapses in  
34  
35 411 MS patients (contagion phenomenon), showed the expected trend of increased relapse  
36  
37 412 incidences.<sup>50</sup> The same phenomenon was true for groups A and C. Finally, during the 12  
38  
39 413 month post-study extended period, the on-study patients who received PLP10 showed a  
40  
41 414 persistent benefit in the ARR compared with the placebo (six relapses for the 10 subjects  
42  
43 415 within the PLP10 group, 0.6 ARR versus 19 for the 12 subjects within the placebo group,  
44  
45 416 1.58 ARR), indicating a statistically significant 62% adjusted relative rate reduction in the  
46  
47 417 ARR for the PLP10 group (RRR 0.38, 95% CI 0.12 to 0.99,  $p=0.046$ ).  
48  
49  
50  
51  
52  
53  
54  
55  
56  
57  
58  
59  
60

1  
2  
3 419 Regarding the ITT analysis, the relapses of the drop-out patients are reported in Table 4A. As  
4  
5 420 expected, no statistically significant differences in the ARR were calculated for the  
6  
7 421 comparison of any group versus placebo for the 24 months on-treatment (Table 4B). The ITT  
8  
9 422 population on DMT and/or on natalizumab is shown within the Supplementary Information  
10  
11 423 Fig 1. Interestingly, despite the high non-adherence rate, there was a statistically significant  
12  
13 424 difference for the comparison of the ARR in the 24 months before entry baseline with the 24  
14  
15 425 months on-treatment for the PLP10 group (RRR 0.45, 95% CI 0.26 to 0.78,  $p=0.005$ ).  
16  
17  
18  
19 426

### 20 21 427 **Disability progression**

22  
23 428 In the per-protocol analysis, at two years, the time to disability progression was significantly  
24  
25 429 longer only with PLP10. The cumulative probability of disability progression was 10% in the  
26  
27 430 PLP10 group and 58% in the placebo group ( $p=0.019$ ) (Supplementary Information Fig 2).

28  
29 431 After excluding the patients on natalizumab, there was again a statistically significant  
30  
31 432 difference between the PLP10 and placebo groups for the same analysis ( $p=0.006$ ) (Fig 4A).

32  
33 433 At two years, the cumulative probability of disability progression was 10% in the PLP10  
34  
35 434 group and 70% in the placebo group, which represents a decrease of 60 percentage points or a  
36  
37 435 relative 86% decrease in the risk of the sustained progression of disability within the PLP10  
38  
39 436 group (adjusted hazard ratio, 0.11; 95% CI 0.01 to 0.97,  $p=0.047$ ). One versus seven out of  
40  
41 437 ten patients progressed to confirmed disability in the PLP10 and placebo groups, respectively,  
42  
43 438 when patients on natalizumab were excluded. No statistically significant difference was  
44  
45 439 observed for any comparison of the other two groups with the placebo group (Fig 4A and  
46  
47 440 Supplementary Information Fig 2).  
48  
49  
50  
51  
52  
53  
54  
55  
56  
57  
58  
59  
60

54 442 In the ITT analysis, at two years, the cumulative probability of progression was 10% in the  
55  
56 443 PLP10 group and 35% in the placebo group ( $p=0.052$ , a trend for an effect), which represents

1  
2  
3 444 a decrease of 25 percentage points or a relative 71% decrease for the PLP10 group with  
4  
5 445 respect to the risk of sustained progression of disability (adjusted hazard ratio 0.22, 95% CI  
6  
7 446 0.04 to 1.07,  $p=0.06$ ) (Fig 4B). Two versus seven out of the total randomised patients  
8  
9 447 progressed to confirmed disability in the PLP10 and placebo groups, respectively. No  
10  
11 448 significant differences were observed for groups A or C compared with the placebo group  
12  
13 449 (Fig 4B). The mean change in the EDSS score as a function of visit number is shown in  
14  
15 450 Figure 5.  
16  
17  
18  
19

451

## 452 **MRI**

20  
21  
22  
23 453 Over two years, the MRI results supported a PLP10-related positive effect as only 29% from  
24  
25 454 the PLP10 group, in contrast to 67% from the placebo group, developed new or enlarging T2  
26  
27 455 lesions (57% relative risk reduction). After excluding the patients on natalizumab, there was  
28  
29 456 an increased relative risk reduction (64%) for PLP10 compared with the placebo, with 29%  
30  
31 457 of patients on PLP10 and 80% on placebo developing new or enlarging T2 lesions (Table 5).  
32  
33

458

## 459 **Safety**

34  
35  
36  
37 460 Over the course of the 30 month study, no significant adverse events were reported for any  
38  
39 461 group. The only aetiology for the drop-outs was the palatability and smell of the formula  
40  
41 462 preparations in addition to pregnancy. Nausea was reported by two patients. No abnormal  
42  
43 463 values were observed on any of the biochemical and haematological blood tests. No allergic  
44  
45 464 reactions were reported.  
46  
47  
48

465

466

## 467 **Discussion**

468

469

470

471

1  
2  
3 468 In this proof-of-concept, randomised, double-blind clinical trial assessing the safety and  
4  
5 469 efficacy of three variations of a novel nutritional formula in RRMS, we observed a significant  
6  
7 470 association for a formula containing a balanced mixture of specific omega-3 and omega-6  
8  
9 471 PUFAs, MUFAs, SFAs, vitamin A, vitamin E and  $\gamma$ -tocopherol (PLP10) compared with the  
10  
11 472 placebo for both the ARR and the progression of disability in the per-protocol analysis. Our  
12  
13 473 results included analyses pertaining to a total of 42 months of study-collected data, including  
14  
15 474 the 12-month intervention-free treatment extension period. We also observed a high drop-out  
16  
17 475 rate that was mostly the result of formula palatability, a common phenomenon in trials using  
18  
19 476 oily interventions. Interestingly, a statistically significant reduction in the ARR and disability  
20  
21 477 progression was also observed when comparing the ARR of the PLP10 patients in the 24-  
22  
23 478 month period prior to the study with the ARR of the 24 months on-study; the observed  
24  
25 479 differences became larger when the patients who received natalizumab (the currently most  
26  
27 480 potent disease modifier) were excluded. The ARR decreased within a year on PLP10 and  
28  
29 481 remained stable until the study completion. The statistically significant difference in the ARR  
30  
31 482 between patients on PLP10 and those on placebo continued for the 12 month extended period  
32  
33 483 (persistent effect) without a significant difference on the DMT. These clinical findings are  
34  
35 484 supported by the results from the MRI analysis, in which the proportion of patients free from  
36  
37 485 new or enlarging brain T2 lesions was also higher in the PLP10 group than the placebo  
38  
39 486 group. No severe side effects have been reported.  
40  
41  
42  
43  
44  
45  
46  
47  
48  
49  
50  
51  
52  
53  
54  
55  
56  
57  
58  
59  
60

488 To the best of our knowledge, this study is the first randomised clinical trial assessing the  
489 proposed combination of active ingredients in a standardized proportion and dosing scheme  
490 for MS treatment designed according to the systems medicine approach. Nutrition is  
491 commonly accepted as one of the possible environmental factors involved in the pathogenesis  
492 of MS, but its role as a complementary MS treatment is unclear and largely disregarded.<sup>51</sup> It

1  
2  
3 493 is well known that the majority of the patients suffering from MS do use dietary supplements  
4  
5 494 for a variable length of time.<sup>52</sup> Dietary antioxidants and fatty acids may influence the disease  
6  
7 495 process in MS by reducing immune-mediated inflammation, oxidative stress and excitotoxic  
8  
9 496 damage.<sup>12</sup> Published data have revealed that healthy dietary molecules have a pleiotropic role  
10  
11 497 and are able to change cell metabolism and down-regulate inflammation by interacting with  
12  
13 498 enzymes, nuclear receptors and transcriptional factors.<sup>51</sup> Current available treatments are the  
14  
15 499 products of reductionism, partially effective and associated with severe side effects.  
16  
17 500 Interferons and glatiramer acetate, the most widely used first-line MS drugs available today,  
18  
19 501 are associated with the least severe side effects among the MS therapies, but they are reported  
20  
21 502 to reduce the ARR only by about one third and with no significant effect on the progression  
22  
23 503 of disability.<sup>53</sup> Natalizumab reduces the ARR by 68% and decreases the possibility of  
24  
25 504 disability progression by 43%, with 57% of patients free of new or enlarging T2 lesions on  
26  
27 505 MRI scans, compared with 15% on placebo.<sup>54</sup> Fingolimod is associated with a 54% ARR  
28  
29 506 reduction (without a significant benefit on the progression of disability). Both natalizumab  
30  
31 507 and fingolimod are second-line drugs associated with severe side-effects.<sup>55</sup>  
32  
33 508  
34  
35 509 Mehta in a review paper, in 2009, reported different clinical studies on interventions  
36  
37 510 formulated based on the individual aforementioned molecular ingredients or based on a  
38  
39 511 specific ratio of the aforementioned molecular ingredients for MS treatment; although no one  
40  
41 512 was reported using the antioxidant vitamin  $\gamma$ -tocopherol.<sup>56</sup> In our study, the choice of  
42  
43 513 ingredient proportion and dosing scheme was based upon evidence derived from *in vivo* and  
44  
45 514 *in vitro* data. In the Western diet, the ratio of omega-3 to omega-6 is approximately 1:20–30;  
46  
47 515 in populations that consume fish-based diets, the ratio is approximately 1:1–2.<sup>57 58</sup> The  
48  
49 516 intervention daily dose was aiming to be, and believed to be, high enough to restore/amplify  
50  
51 517 body-efficient antioxidant activity and ensure cellular membranes lipid profile normalisation  
52  
53  
54  
55  
56  
57  
58  
59  
60

1  
2  
3 518 (PUFA content) and simultaneously potentiate the involvement of the ingredients in the anti-  
4  
5 519 inflammatory and recovery mechanisms. Dietary fatty acid molecules need an approximately  
6  
7 520 six month period to exert their beneficial effect, and this essential parameter was under  
8  
9 521 consideration for the first time in our study design (normalisation period).<sup>46</sup> This  
10  
11 522 chronotherapy parameter might be of major importance and is in line with the systems  
12  
13 523 medicine treatment philosophy. We believe that the persistent effect within the post-study  
14  
15 524 period is in agreement with the reported very long washout phase for omega-3 fatty acids,  
16  
17 525 especially DHA, to return to the pre-treatment values.<sup>46</sup> Considering that omega-3 PUFA  
18  
19 526 supplementation can promote the replacement of AA within the cellular membranes, we can  
20  
21 527 speculate that an increased inflammatory activity can possibly result during the first six  
22  
23 528 months of supplementation.  
24  
25  
26  
27  
28

29  
30 530 In addition to EPA, DHA, LA, and GLA, PLP10 contained limited quantities of other  
31  
32 531 structural/active PUFAs, specific MUFAs (mostly oleic acid) and SFAs (palmitic and stearic  
33  
34 532 acids), specifically to provide a direct source for neuronal cell membrane rehabilitation and  
35  
36 533 for (re)myelination and neuroprotection because these compounds are all major components,  
37  
38 534 precursors and building blocks of any new physiological myelin and cellular membranes in  
39  
40 535 general. Assembly of the correct molecules into the myelin membrane may be especially  
41  
42 536 critical during active synthesis. If these critical constituents are not directly or indirectly  
43  
44 537 available, amyelination, dysmyelination or demyelination may ensue.<sup>59</sup> The maintenance of  
45  
46 538 myelin requires continued turnover of its components throughout life.<sup>60 61</sup>  
47  
48  
49

50  
51  
52 540 Different factors and molecular entities appear to be part of the possible aetiology for MS,  
53  
54 541 with specific PUFAs and antioxidants found to be key substances related to all known  
55  
56 542 pathogenic and recovery mechanisms. In our study, we further propose that a holistic systems  
57  
58  
59  
60

1  
2  
3 543 medicine model approach can be applied by synchronised action. First, there is an obvious  
4  
5 544 convenience in administering one formula containing different specific active ingredients.  
6  
7 545 The currently available evidence supports that nutritional interventions would confer a small  
8  
9 546 to medium treatment effect with an accompanying appropriate safety profile.<sup>12 52 56</sup>  
10  
11 547 Combining these specific active ingredients together with  $\gamma$ -tocopherol and other specific  
12  
13 548 active molecules into one stable formulation is expected to enhance adherence while still  
14  
15 549 offering an appropriate safety profile. A similar approach could not be adopted for  
16  
17 550 pharmaceutical interventions with common and severe adverse events, such as those  
18  
19 551 indicated today for patients with MS. Given the advantages of the simultaneous use and that  
20  
21 552 all the included ingredients have proven individually a valid biological plausibility and have  
22  
23 553 been tested in various settings and under various dose schemes, we also assessed the  
24  
25 554 hypothesis that a novel mixture of these ingredients would have a postulated efficacy attained  
26  
27 555 synergistically through different mechanisms of action.<sup>52 56</sup> Interestingly, the observed  
28  
29 556 magnitude of the treatment effect cannot be explained by adding up the postulated efficacy  
30  
31 557 estimates of the individual ingredients. Findings from *in vitro* and *in vivo* studies support this  
32  
33 558 notion of proposed synergy although this hypothesis can only be taken forward when the  
34  
35 559 observed treatment effect is validated in various settings and in a larger number of patients.  
36  
37 560  
38  
39 561 We acknowledge that our study has two considerable limitations: the small sample size and  
40  
41 562 the high drop-out rate. Regarding the sample size, one should bear in mind that this study is a  
42  
43 563 small, phase-2 clinical trial assessing a novel intervention and thus has comparable size in the  
44  
45 564 appropriate literature. Questions taken forward from this trial can be assessed in a larger  
46  
47 565 randomised trial in which appropriate power calculations would be possible, taking into  
48  
49 566 consideration the findings of the present study. The adherence of the subjects is another  
50  
51 567 limitation of our study, but the total duration of the study that covers a total of 42 months  
52  
53  
54  
55  
56  
57  
58  
59  
60

1  
2  
3 568 follow-up adds power to the results.<sup>48</sup> We acknowledge that we had to deliver the  
4  
5 569 intervention in the way most frequently associated with low compliance, i.e., an oral, liquid  
6  
7 570 formula, thus triggering maximum intolerance due to taste. Nevertheless, the observed  
8  
9 571 suboptimal compliance is in accordance with the published literature in which clinical trials  
10  
11 572 assessing liquid fatty acid interventions show a weaker adherence compared with clinical  
12  
13 573 trials of pharmaceutical interventions. Indeed, in our study, we consistently recorded the  
14  
15 574 reasons for withdrawal: most of the participants did not discontinue due to safety issues, but  
16  
17 575 rather due to palatability issues. Controlling non-compliance due to palatability issues is by  
18  
19 576 far easier to address compared with non-compliance related to adverse events and can be  
20  
21 577 resolved when optimisation of the formulation is achieved in future trials. At this stage of the  
22  
23 578 development of the intervention, we would by far exceed the cost-effectiveness threshold if  
24  
25 579 we were to invest in improving these features of the intervention. Moreover, we should also  
26  
27 580 note that MS patients are subject to far more frequent and more serious adverse events related  
28  
29 581 to the current standard treatments.  
30  
31  
32  
33

34 582  
35  
36 583 As a direct consequence of the low compliance and the loss of power, the performed  
37  
38 584 intention-to-treat analysis was far less robust than intended, and we would then have to take  
39  
40 585 into serious consideration the performed per-protocol analysis. We focused on the per-  
41  
42 586 protocol data analysis because it is the appropriate method to best provide the answer for the  
43  
44 587 proof-of-concept trial-addressed question.<sup>24</sup> To validly incorporate the results of the per-  
45  
46 588 protocol analysis into the interpretation of the overall results of the trial, we needed to ensure  
47  
48 589 that the randomisation was not seriously violated due to the exclusion of the non-compliers.  
49  
50 590 The comparison between the baseline characteristics of the patients included in the per-  
51  
52 591 protocol analysis did show a relative balance in the compared groups for known confounders.  
53  
54 592 Nevertheless, the presence of unknown confounders introducing bias to the trial results  
55  
56  
57  
58  
59  
60



1  
2  
3 593 cannot be excluded despite non- significant differences in the baseline characteristics. As an  
4  
5 594 additional safeguard towards that end, we also performed adjusted analyses for the primary  
6  
7 595 and secondary analyses for important clinical and demographic parameters, i.e., relapses,  
8  
9 596 EDSS, age and DMT.

10  
11  
12 597

13  
14 598 The present preliminary, small-size, randomised, controlled phase II clinical trial provides  
15  
16 599 evidence for a novel nutraceutical formula based on dietary, metabolic, immunological, and  
17  
18 600 neurobiological pathways possibly involved with disease progression in MS. This novel  
19  
20 601 intervention showed signs of efficacy in the observed annualised relapse rate and disability  
21  
22 602 progression. We took the appropriate methodological measures to control for potential  
23  
24 603 sources of bias and to enable a valid interpretation to be reached. We acknowledge that the  
25  
26 604 presence of bias can only be minimised, not excluded, in any clinical research setting and  
27  
28 605 also that random error is always a possible scenario in small trials. Thus, we present the  
29  
30 606 observed results as an additional piece of randomized evidence and anticipate the replication  
31  
32 607 of our study findings in a larger randomised controlled clinical trial.

33  
34  
35 608

36  
37  
38 609

39  
40  
41 610

42  
43  
44 611

45  
46  
47 612

48  
49  
50 613

51  
52  
53 614

54  
55  
56 615

57  
58  
59 616

60  
61 617

1.  
Treatment Arms

| A†                                                                                                                                                                                                                                                   | B (PLP10)†                                                                                                                                                                                                                                                                                | C†                                                                                                                                              | Placebo†                                                          |
|------------------------------------------------------------------------------------------------------------------------------------------------------------------------------------------------------------------------------------------------------|-------------------------------------------------------------------------------------------------------------------------------------------------------------------------------------------------------------------------------------------------------------------------------------------|-------------------------------------------------------------------------------------------------------------------------------------------------|-------------------------------------------------------------------|
| <b>Intervention:</b><br>EPA (1,650 mg) / DHA (4,650 mg) / GLA (2,000 mg) / LA (3,850 mg) / total other omega-3 (600 mg)* / total MUFA** (1,714 mg) + total SFA (18:0 160 mg, 16:0 650 mg) / vitamin A (0.6 mg) / vitamin E (22 mg) plus citrus aroma | <b>Intervention:</b><br>EPA (1,650 mg) / DHA (4,650 mg) / GLA (2,000 mg) / LA (3,850 mg) / total other omega-3 (600 mg)* / total MUFA** (1,714 mg) + total SFA (18:0 160 mg, 16:0 650 mg) / vitamin A (0.6 mg) / vitamin E (22 mg) + pure $\gamma$ -tocopherol (760 mg) plus citrus aroma | <b>Intervention:</b><br>pure $\gamma$ -tocopherol (760 mg) dispersed in pure virgin olive oil (16,137 mg) as delivery vehicle plus citrus aroma | <b>Intervention:</b><br>Olive oil (pure virgin) plus citrus aroma |

\* Other omega-3: C18:3n-3 37 mg, C18:4n-3 73 mg, C20:4n-3 98 mg, C22:5n-3 392 mg  
 \*\* MUFA: 18:1 1300 mg, 20:1 250 mg, 22:1 82 mg, 24:1 82 mg  
 † Total daily dose 19.5 ml

EPAX1050, EPAX AS, Aalesund, Norway, was used as the source for the omega-3 PUFAs, as re-esterified glycerides from fish body oils; borage seed oil (organic, cold pressed) "Borago officinalis" Goerlich Pharma International GmbH, Edling, Germany, was used as the source for the omega-6 PUFAs, MUFAs and SFAs, as triglycerides. The pure  $\gamma$ -tocopherol was purchased from Tama Biochemical Co. Ltd., Shinjuku-ku Tokyo, Japan; vitamin A, as beta-carotene, from HealthAid Ltd., Middlesex, United Kingdom and the citrus aroma from Givaudan Schwaiz AG, Dubendorf, Switzerland.

**Table 1.** Intervention ingredients per treatment arm.

618

619

620

621

622

623

624

625

626

627

628

| <b>2A.</b>                                 |                   |                    |                   |                   |              |
|--------------------------------------------|-------------------|--------------------|-------------------|-------------------|--------------|
| Characteristics                            | Group A<br>(n=20) | Group B†<br>(n=20) | Group C<br>(n=20) | Placebo<br>(n=20) | P-<br>value  |
| <b>Sex</b>                                 |                   |                    |                   |                   |              |
| Female - no. (%)                           | 15 (75)           | 15 (75)            | 15 (75)           | 15 (75)           | <b>1.000</b> |
| <b>Age (yr)</b>                            |                   |                    |                   |                   |              |
| Mean ± Standard Deviation (SD)             | <b>38.0±11.9</b>  | <b>36.9±8.4</b>    | <b>37.7±8.7</b>   | <b>38.1±10.9</b>  | <b>0.982</b> |
| Median (Range)                             | 38.0 (22–65)      | 37.0 (25–61)       | 36.5 (24–54)      | 36.0 (21–58)      |              |
| <b>Treatment history</b>                   |                   |                    |                   |                   |              |
| Patients on DMT- no. (%)                   | 11 (55)           | 9 (45)             | 12 (60)           | 10 (50)           | <b>0.875</b> |
| <b>Pre-treatment disease duration (yr)</b> |                   |                    |                   |                   |              |
| Mean ± SD                                  | <b>9.0±7.6</b>    | <b>8.6±4.8</b>     | <b>8.6±5.3</b>    | <b>7.7±5.7</b>    | <b>0.909</b> |
| Median (Range)                             | 7.5 (2–37)        | 8.0 (2–20)         | 8.0 (3–24)        | 6.5 (2–25)        |              |
| <b>Pre-treatment relapses‡</b>             |                   |                    |                   |                   |              |
| Mean ± SD                                  | <b>2.33±1.68</b>  | <b>2.41±1.73</b>   | <b>2.31±1.66</b>  | <b>2.10±1.32</b>  | <b>0.946</b> |
| Median (Range)                             | 2.0 (1–6)         | 2.0 (1–7)          | 2.0 (1–6)         | 2.0 (1–4)         |              |
| ARR                                        | <b>1.17</b>       | <b>1.21</b>        | <b>1.16</b>       | <b>1.05</b>       | <b>0.946</b> |
| Patients -% with ≤1 relapse                | 40                | 45                 | 40                | 35                |              |
| <b>Baseline EDSS score‡</b>                |                   |                    |                   |                   |              |
| Mean ± SD                                  | <b>2.52±1.23</b>  | <b>2.15±1.05</b>   | <b>2.42±1.21</b>  | <b>2.39± 0.93</b> | <b>0.775</b> |
| Median (Range)                             | 2.5 (1.0–5.5)     | 2.0 (1.0–4.0)      | 2.5 (0.0–5.0)     | 2.5 (1.0–4.0)     |              |
| <b>2B.</b>                                 |                   |                    |                   |                   |              |
| Characteristics                            | Group A<br>(n=10) | Group B†<br>(n=10) | Group C<br>(n=9)  | Placebo<br>(n=12) | P-<br>value  |
| <b>Sex</b>                                 |                   |                    |                   |                   |              |
| Female - no. (%)                           | 5 (50)            | 7 (70)             | 6 (66.6)          | 10 (83.3)         | <b>0.419</b> |
| <b>Age (yr)</b>                            |                   |                    |                   |                   |              |
| Mean ± SD                                  | <b>36.6±13.5</b>  | <b>34.80±5.4</b>   | <b>40.9±8.1</b>   | <b>39.8±13.2</b>  | <b>0.572</b> |
| Median (Range)                             | 34.5 (22–65)      | 34.5 (26–43)       | 40.0 (29–54)      | 37.5 (21–58)      |              |
| <b>Treatment history</b>                   |                   |                    |                   |                   |              |
| Patients on DMT- no. (%)                   | 6 (60)            | 4 (40)             | 6 (67)            | 6 (50)            | <b>0.949</b> |
| <b>Pre-treatment disease duration (yr)</b> |                   |                    |                   |                   |              |
| Mean ± SD                                  | <b>9.7±10.0</b>   | <b>8.3±5.3</b>     | <b>11.3±6.1</b>   | <b>8.7± 7.1</b>   | <b>0.807</b> |
| Median (Range)                             | 7.5 (2–37)        | 8.0 (2–20)         | 8.0 (4–24)        | 5.5 (2–25)        |              |
| <b>Pre-treatment relapses</b>              |                   |                    |                   |                   |              |

|                             |               |               |               |               |       |
|-----------------------------|---------------|---------------|---------------|---------------|-------|
| Mean ± SD                   | 2.20±1.47     | 2.70±1.25     | 1.78±0.66     | 1.67±1.37     | 0.241 |
| Median (Range)              | 2.0 (1 – 6)   | 2.5 (1 – 4)   | 2.0 (1 – 3)   | 1.5 (1 – 4)   |       |
| ARR                         | 1.10          | 1.35          | 0.89          | 0.83          |       |
| Patients -% with ≤1 relapse | 30            | 20            | 33            | 50            |       |
| <b>Baseline EDSS score</b>  |               |               |               |               |       |
| Mean ± SD                   | 2.65±1.37     | 2.40±1.12     | 2.11±1.02     | 2.16±0.96     | 0.698 |
| Median (Range)              | 3.0 (1.0–5.5) | 2.5 (1.0–4.0) | 2.0 (1.0–4.0) | 2.0 (1.0–3.5) |       |

† PLP10 group

‡ Available data at entry baseline (n=18 for group A, n=17 for group B, n=19 for group C, n=19 for group D)

**Table 2.** Section 2A reports the demographics and baseline disease characteristics for the total randomised population by treatment arm.

Section 2B reports the demographics and baseline disease characteristics of the all-time on-study population by treatment arm. There were no significant between study-group differences at baseline for any characteristic.

629

630

631

632

633

634

635

636

637

638

639

640

641

642

1  
2  
3  
4  
5  
6  
7  
8  
9  
10  
11  
12  
13  
14  
15  
16  
17  
18  
19  
20  
21  
22  
23  
24  
25  
26  
27  
28  
29  
30  
31  
32  
33  
34  
35  
36  
37  
38  
39  
40  
41  
42  
43  
44  
45  
46  
47  
48  
49  
50  
51  
52  
53  
54  
55  
56  
57  
58  
59  
60

| <b>3A.</b>                                                                                                                                                                     |                   |              |                    |              |                  |              |                   |              |
|--------------------------------------------------------------------------------------------------------------------------------------------------------------------------------|-------------------|--------------|--------------------|--------------|------------------|--------------|-------------------|--------------|
| Characteristics                                                                                                                                                                | Group A<br>(N=10) |              | Group B†<br>(N=10) |              | Group C<br>(N=9) |              | Placebo<br>(N=12) |              |
| End Point                                                                                                                                                                      | X                 | Y            | X                  | Y            | X                | Y            | X                 | Y            |
| Total No. of relapses                                                                                                                                                          | 22                | 17           | 27                 | 8            | 16               | 13           | 20                | 25           |
| <b>Annual Relapse Rate (ARR)</b>                                                                                                                                               | <b>1.10</b>       | <b>0.85</b>  | <b>1.35</b>        | <b>0.40</b>  | <b>0.88</b>      | <b>0.72</b>  | <b>0.83</b>       | <b>1.04</b>  |
| <b>% Reduction Compared with Placebo (primary endpoint) (Ys)¶</b>                                                                                                              |                   | <b>-18</b>   |                    | <b>-62</b>   |                  | <b>-30</b>   |                   | <b>N/A</b>   |
| <b>P Value against placebo</b>                                                                                                                                                 |                   | <b>0.468</b> |                    | <b>0.024</b> |                  | <b>0.578</b> |                   |              |
| <b>ARR change -% (Y to X)¶</b>                                                                                                                                                 |                   | <b>-23</b>   |                    | <b>-70</b>   |                  | <b>-18</b>   |                   | <b>+25</b>   |
| <b>P value against baseline</b>                                                                                                                                                |                   | <b>0.425</b> |                    | <b>0.003</b> |                  | <b>0.578</b> |                   | <b>0.500</b> |
| X: Total number of relapses for the 24 months pre-treatment (baseline)<br>Y: Total number of relapses for the 24 months on-treatment<br>¶ Unadjusted estimate                  |                   |              |                    |              |                  |              |                   |              |
| <b>3B.</b>                                                                                                                                                                     |                   |              |                    |              |                  |              |                   |              |
| <b>Excluding patients on natalizumab</b>                                                                                                                                       | Group A<br>(N=9)  |              | Group B†<br>(N=10) |              | Group C<br>(N=9) |              | Placebo<br>(N=10) |              |
| End Point                                                                                                                                                                      | X                 | Y            | X                  | Y            | X                | Y            | X                 | Y            |
| Total No. of relapses                                                                                                                                                          | 16                | 15           | 27                 | 8            | 16               | 13           | 13                | 19           |
| <b>Annual Relapse Rate (ARR)</b>                                                                                                                                               | <b>0.88</b>       | <b>0.83</b>  | <b>1.35</b>        | <b>0.40</b>  | <b>0.88</b>      | <b>0.72</b>  | <b>0.65</b>       | <b>0.95</b>  |
| <b>% Reduction Compared with Placebo (primary endpoint) (Ys)¶</b>                                                                                                              |                   | <b>-13</b>   |                    | <b>-58</b>   |                  | <b>-24</b>   |                   | <b>N/A</b>   |
| <b>P Value against placebo</b>                                                                                                                                                 |                   | <b>0.493</b> |                    | <b>0.016</b> |                  | <b>0.412</b> |                   |              |
| <b>ARR change -% (Y to X)¶</b>                                                                                                                                                 |                   | <b>-6</b>    |                    | <b>-70</b>   |                  | <b>-18</b>   |                   | <b>+46</b>   |
| <b>P value against baseline</b>                                                                                                                                                |                   | <b>0.857</b> |                    | <b>0.003</b> |                  | <b>0.578</b> |                   | <b>0.354</b> |
| X: Total number of relapses for the 24 months pre-treatment (baseline)<br>Y: Total number of relapses for the 24 months on-treatment<br>† PLP10 group<br>¶ Unadjusted estimate |                   |              |                    |              |                  |              |                   |              |

**Table 3.** Section 3A reports the two-year primary end points of the ARR for the all-time on-study population by treatment arm and per-cent difference from the placebo. During the 24 mo period on-

1  
2  
3 treatment, the ARR of group A was 0.85, with an 18% decrease compared with placebo (p=0.468); that  
4  
5 of the PLP10 group was 0.40, with a 62% decrease (p=0.024); and that of group C was 0.72, with a 30%  
6  
7 decrease (p=0.578). This section also reports the comparison of the 24 mo pre-treatment ARR (baseline  
8  
9 ARR) with the 24 mo on-treatment ARR of the all-time on-study population, including patients on  
10  
11 natalizumab.  
12

13  
14  
15  
16 Section 3B reports the comparison of the 24 mo pre-treatment ARR with the 24 mo on-treatment ARR of  
17  
18 the all-time on-study population excluding patients on natalizumab and the comparison of the ARR  
19  
20 during the 24 mo period on-treatment (primary end point) for each treatment group compared with the  
21  
22 placebo.  
23  
24

25 643

26 644

27 645

28 646

29 647

30 648

31 649

32 650

33 651

34 652

35 653

36 654

37 655

38 656

39 657

40 658

41 659

42 660

| <b>4A.</b>                                                                                                                                                                     |                   |             |                    |             |                   |             |                   |             |  |
|--------------------------------------------------------------------------------------------------------------------------------------------------------------------------------|-------------------|-------------|--------------------|-------------|-------------------|-------------|-------------------|-------------|--|
| Characteristics                                                                                                                                                                | Group A<br>(N=8)  |             | Group B†<br>(N=7)  |             | Group C<br>(N=10) |             | Placebo<br>(N=7)  |             |  |
|                                                                                                                                                                                | X                 | Y           | X                  | Y           | X                 | Y           | X                 | Y           |  |
| No. of Relapses                                                                                                                                                                | 20                | 14          | 14                 | 14          | 27                | 26          | 20                | 13          |  |
| <b>Annual Relapse Rate (ARR)</b>                                                                                                                                               | <b>1.25</b>       | <b>0.88</b> | <b>1.00</b>        | <b>1.00</b> | <b>1.35</b>       | <b>1.30</b> | <b>1.42</b>       | <b>0.92</b> |  |
| X: Total number of relapses for the 24 months pre-treatment<br>Y: Total number of relapses for the 24 months on-treatment                                                      |                   |             |                    |             |                   |             |                   |             |  |
| <b>4B.</b>                                                                                                                                                                     |                   |             |                    |             |                   |             |                   |             |  |
| Characteristics                                                                                                                                                                | Group A<br>(N=20) |             | Group B†<br>(N=20) |             | Group C<br>(N=20) |             | Placebo<br>(N=20) |             |  |
| End Point                                                                                                                                                                      | X                 | Y           | X                  | Y           | X                 | Y           | X                 | Y           |  |
| No. of Relapses                                                                                                                                                                | 45                | 34          | 49                 | 30          | 46                | 41          | 43                | 41          |  |
| <b>Annual Relapse Rate (ARR)</b>                                                                                                                                               | <b>1.13</b>       | <b>0.85</b> | <b>1.23</b>        | <b>0.75</b> | <b>1.15</b>       | <b>1.03</b> | <b>1.08</b>       | <b>1.03</b> |  |
| ARR Reduction -% (Y to X)¶                                                                                                                                                     | -25               |             | -39                |             | -10               |             | -5                |             |  |
| <b>P value against baseline</b>                                                                                                                                                | <b>0.120</b>      |             | <b>0.005</b>       |             | <b>0.475</b>      |             | <b>0.652</b>      |             |  |
| <b>% Reduction of the ARR Compared with Placebo (Ys)¶</b>                                                                                                                      | <b>-18</b>        |             | <b>-27</b>         |             | <b>0.0</b>        |             | <b>N/A</b>        |             |  |
| <b>P Value against placebo</b>                                                                                                                                                 | <b>0.447</b>      |             | <b>0.121</b>       |             | <b>0.996</b>      |             |                   |             |  |
| X: Total number of relapses for the 24 months pre-treatment (baseline)<br>Y: Total number of relapses for the 24 months on-treatment<br>¶ Unadjusted estimate<br>† PLP10 group |                   |             |                    |             |                   |             |                   |             |  |

**Table 4.** Section 4A reports the two year primary end point of relapses based on the study design as reported by the drop-out patients by treatment arm. The most drop-out patients who transferred to disease-modified therapy (DMT) were from group A and the placebo group, with three and two patients, respectively, on natalizumab. These parameters justify the decreased number of relapses recorded within the group A and placebo drop-outs and could affect the ITT analysis in favour of the placebo when the total two-year recorded data are used. For the PLP10 group, 14 relapses were reported at baseline, which remained the same during the two-year study period. For the placebo group, 20 relapses were reported at

1  
2  
3 baseline and decreased to 13 during the two-year study period. These results are expected  
4 because for the PLP10 group, 43% of the drop-outs were under DMT at entry baseline and  
5 remained the same until the end of the study, with no patient on natalizumab, but the 57% of  
6 the placebo group drop-outs who were under DMT at entry baseline increased to 86% at the  
7 end of the study, including two patients on natalizumab.  
8  
9  
10  
11  
12

13  
14  
15  
16 Section 4B reports the comparison of the 24 month pre-treatment ARR (baseline) with the 24  
17 month on-treatment ARR for the total randomised population by treatment arm. The ARR of  
18 the PLP10 group was 1.23 at baseline and 0.75 at the end of the study (39% reduction,  
19  $p=0.005$ ), and that for the placebo group was 1.08 at baseline and 1.03 at the end of the study  
20 (5% reduction,  $p=0.652$ ). No significant difference was calculated for the other two treatment  
21 arms. During the 24 months on-treatment, the PLP10 group presented a 27% reduction in the  
22 ARR versus the placebo group ( $p=0.121$ ), with all groups lacking statistically significant  
23 results.  
24  
25  
26  
27  
28  
29  
30  
31  
32  
33

660

661

662

663

664

665

666



| <b>5.</b>                                                                                                             |                   |                            |                  |                    |                                      |
|-----------------------------------------------------------------------------------------------------------------------|-------------------|----------------------------|------------------|--------------------|--------------------------------------|
| Characteristics*                                                                                                      | Group A<br>(n=10) | Group B<br>PLP10<br>(n=10) | Group C<br>(n=9) | Placebo<br>(n=12)  | P-value<br>Group<br>B vs.<br>Placebo |
| Annual relapse rate over 1 year**                                                                                     | <b>0.80</b>       | <b>0.40</b>                | <b>0.78</b>      | <b>0.83</b>        |                                      |
| Total number of relapses**                                                                                            | 8                 | 4                          | 7                | 10                 |                                      |
| <b>Primary end points</b>                                                                                             |                   |                            |                  |                    |                                      |
| Annual relapse rate over 2 years (95% CI)**                                                                           | 0.85              | <b>0.40 (0.15-0.87)</b>    | 0.72             | <b>1.04</b>        | <b>0.024</b>                         |
| Total number of relapses**                                                                                            | 17                | 8                          | 13               | 25                 |                                      |
| <b>Excluding patients on natalizumab</b>                                                                              |                   |                            |                  |                    |                                      |
| Annual relapse rate over 2 years (95% CI)                                                                             | 0.83              | <b>0.40 (0.10-0.79)</b>    | 0.72             | <b>0.95</b>        | <b>0.016</b>                         |
| Total number of relapses                                                                                              | 15                | <b>8</b>                   | 13               | <b>19</b>          |                                      |
| <b>Secondary end points</b>                                                                                           |                   |                            |                  |                    |                                      |
| Cumulative probability of sustained progression increase by 1 point on EDSS, confirmed after 6 mo, over 2 years -% ** | 43                | <b>10 (1/10)</b>           | 24               | <b>58 (7/12)</b>   | <b>0.019</b>                         |
| <b>Excluding patients on natalizumab</b>                                                                              |                   |                            |                  |                    |                                      |
| Cumulative probability of sustained progression increase by 1 point on EDSS, confirmed after 6 mo, over 2 years -%    | 33                | <b>10 (1/10)</b>           | 24               | <b>70 (7/10)</b>   | <b>0.006</b>                         |
| <b>Exploratory Results</b>                                                                                            |                   |                            |                  |                    |                                      |
| Patient proportion with ≤1 relapse over 2 years -% **                                                                 | 50 (5/10)         | <b>90 (9/10)</b>           | 56 (5/9)         | <b>42 (5/12)</b>   | <b>0.030</b>                         |
| <b>MRI</b>                                                                                                            |                   |                            |                  |                    |                                      |
| Patient proportion with new or enlarging T2 lesions-% **                                                              | ----              | <b>29 (2/7)</b>            | ----             | <b>67 (4/6)</b>    |                                      |
| <b>Excluding patients on natalizumab</b>                                                                              |                   |                            |                  |                    |                                      |
| Patient proportion with no new or enlarging T2 lesions-%                                                              | ----              | <b>29 (2/7)</b>            | ----             | <b>80 (4/5)</b>    |                                      |
| <b>DMT (interferons, glatiramer acetate) and natalizumab</b>                                                          |                   |                            |                  |                    |                                      |
| Patient proportion on DMT and natalizumab at the end of 2 years-% **                                                  | 80 (8/10)†        | <b>60 (6/10)</b>           | 67 (6/9)         | <b>75 (9/12) ‡</b> | <b>0.747</b>                         |
| * CI denotes confidence interval.                                                                                     |                   |                            |                  |                    |                                      |
| ** Including patients on natalizumab                                                                                  |                   |                            |                  |                    |                                      |
| † 1 out of 10 on natalizumab                                                                                          |                   |                            |                  |                    |                                      |
| ‡ 2 out of 12 on natalizumab                                                                                          |                   |                            |                  |                    |                                      |
| <b>Table 5.</b> Clinical end points according to study group for the all-time on-study population.                    |                   |                            |                  |                    |                                      |

667

1  
2  
3 668 Acknowledgments: We thank all participating patients. We thank Thyrsos Posporis MD and  
4  
5 669 the central reading centre (Ayios Therissos Medical Diagnostic Centre, Nicosia, Cyprus) as  
6  
7 670 well as Eleni Eracleous, MD (neuroradiologist) for contributing the MRI scans and their  
8  
9 671 teams for the MRI reading. Special thanks to Elena Kkolou, the pharmacist involved in the  
10  
11 672 study, and Eftychia Gaglia for her nursing contribution and collection of blood from the  
12  
13 673 patients. We also thank Demetris Hadjisofoklis and Ioanna Leontiou (University of Nicosia,  
14  
15 674 Helix Business incubator) for their contributions to the randomisation process, data  
16  
17 675 collection, filing and blind code keeping. Additionally, we would like to thank the CING for  
18  
19 676 hosting the project. Moreover, we thank the Cyprus Ministry of Commerce, Industry and  
20  
21 677 Tourism for funding the project and Yasoo Health Ltd. for providing some of the raw  
22  
23 678 materials in exchange of investigating, on their behalf, the efficacy and safety of  $\gamma$ -  
24  
25 679 tocopherol.  
26  
27  
28  
29

680

30  
31 681 Contributors: All authors interpreted the data. I.S.P drafted the report and figures, and all  
32  
33 682 authors critically revised and approved the final version. M.C.P and I.S.P were responsible  
34  
35 683 for the protocol and study design. M.C.P was the evaluator of the patients' clinical progress  
36  
37 684 signs and the treating physician. I.S.P and G.N.L were involved in the non-pharmacologic  
38  
39 685 treatment-related care. I.S.P performed the literature search, and both I.S.P and G.N.L  
40  
41 686 contributed on the intervention formulation and composition rationale. I.S.P supervised the  
42  
43 687 composition procedure of the interventions and the fatty acid profile analysis of the red blood  
44  
45 688 cell membranes. E.E.N and I.S.P performed the statistical analyses. E.E.N was an  
46  
47 689 independent scientist. All authors vouch for the accuracy and completeness of the data and  
48  
49 690 the statistical analyses.  
50  
51

691

1  
2  
3 692 Funding: Supported by a grant from the Cyprus Ministry of Commerce, Industry and  
4  
5 693 Tourism, as part of a program for the creation of new high technology and innovation  
6  
7 694 enterprises through the business incubator.  
8  
9  
10 695  
11 696 Competing interests: M.C.P, G.N.L, I.S.P received grant support from the Cyprus Ministry of  
12  
13 697 Commerce, Industry and Tourism, the Program for the Creation of New High Technology  
14  
15 698 and Innovation Enterprises through the Business Incubator. PALUPA Medical Ltd. is a  
16  
17 699 research company formed and registered for the completion of the study, as required by the  
18  
19 700 Governments' funding grant program. M.C.P, G.N.L, I.S.P, and CING are all stockholders of  
20  
21 701 the PALUPA Medical Ltd. M.C.P is an employee at the CING. I.S.P is a senior research  
22  
23 702 collaborator hosted by the CING. G.N.L is a CING collaborator. E.E.N declares no  
24  
25 703 competing interests. No pharmaceutical companies were involved in this phase II clinical  
26  
27 704 trial. The intervention is under a USA provisional patent; Application Number 61469081.  
28  
29  
30  
31 705  
32  
33 706 Ethical approval: Cyprus National bioethics committee (reference EEBK/EII/2005/10).  
34  
35  
36 707  
37  
38 708 All authors have completed the Unified Competing Interest form at  
39  
40 709 [www.icmje.org/coi\\_disclosure.pdf](http://www.icmje.org/coi_disclosure.pdf) (available on request from the corresponding author) and  
41  
42 710 declare that (1) M.C.P, G.N.L, I.S.P have support from the Cyprus Ministry of Commerce,  
43  
44 711 Industry and Tourism, the Program for the Creation of New High Technology and Innovation  
45  
46 712 Enterprises through the Business Incubator for the submitted work; (2) E.E.N has had no  
47  
48 713 relationships with the Cyprus Ministry of Commerce, Industry and Tourism or PLUPA  
49  
50 714 Medical Ltd., which might have an interest in the submitted work, in the previous 3 years; (3)  
51  
52 715 their spouses, partners, or children have no financial relationships that may be relevant to the  
53  
54  
55  
56  
57  
58  
59  
60

1  
2  
3 716 submitted work; and (4) E.E.N has a non-financial interest that may be relevant to the  
4  
5 717 submitted work.

6  
7 718

8  
9 719 The Corresponding Author has the right to grant on behalf of all authors and does grant on  
10  
11 720 behalf of all authors, an exclusive license on a worldwide basis to the BMJ Publishing Group  
12  
13 721 Ltd and its Licensees to permit this article (if accepted) to be published in BMJ editions and  
14  
15 722 any other BMJ PGL products and sublicenses to exploit all subsidiary rights, as set out in our  
16  
17 723 license (<http://resources.bmj.com/bmj/authors/checklists-forms/licence-for-publication>)."  
18  
19

20  
21 724  
22  
23

## Article Summary

### Article focus:

- The increasing prevalence of multiple sclerosis (MS) combined with the limited efficacy and side effects of the existing treatments urge the development of new, innovative, more effective, safe, and preventive treatment strategies.
- We propose three novel nutraceutical treatment interventions, formulated based on a systems medicine rational through nutritional systems biology; with PLP10 representing the complete composition of the formulation and the other two treatments represent partial formulations.
- We have studied the proposed interventions on 80 relapsing remitting MS patients (four groups of 20 each) for a total of 42 months (including the 12-month extended period) in a randomised, double-blind, placebo-controlled, phase II proof-of-concept clinical trial.

### Key messages:

- In this small proof-of-concept, randomised, double-blind clinical trial, the PLP10 treatment statistically significantly reduced the ARR and the risk of sustained disability progression without any reported serious adverse events.
- Overall, a total of 41 (51%) patients completed the 30-month trial. For the per-protocol analysis of primary end point, we observed a 64% relative rate reduction for the PLP10 group (adjusted RRR 0.36, 95% CI 0.15 to 0.87, p=0.024). The cumulative probability of disability progression at two years was 10% in the PLP10 group and 58% in the placebo group (unadjusted log-rank p=0.019).

#### **Strengths and limitations of this study:**

- The randomisation, blinding, the use of placebo, the definite inclusion/exclusion criteria and primary/secondary end points, along with the 30 month duration of the study, as well as the inclusion of a 6-month normalisation (chronotherapy) period allow for an appropriate overview of the safety and efficacy of the assessed interventions.
- The small sample size and the high rate of drop-outs (due to the palatability of the formula) are the limitations associated with the present study.

725

726

727

728

729

730

731 **References**

- 732 1. Baranzini SE, Oksenberg JR, Hauser SL. New insights into the genetics of multiple  
733 sclerosis. *Journal of Rehabilitation Research and Development* 2002;39(2):201-10.
- 734 2. Goni J, Esteban FJ, de Mendizabal NV, Sepulcre J, Ardanza-Trevijano S, Agirrezabal I,  
735 et al. A computational analysis of protein-protein interaction networks in  
736 neurodegenerative diseases. *BMC Syst Biol* 2008;2:52.
- 737 3. Lobo I. Multifactorial inheritance and genetic disease. *Nature Education* 2008; 1(1).
- 738 4. Compston A, Coles A. Multiple sclerosis. *Lancet* 2002;359(9313):1221.
- 739 5. Evans PH. Free radicals in brain metabolism and pathology. *British Medical Bulletin*  
740 1993;49(3):577-87.
- 741 6. Knight J. Reactive oxygen species and the neurodegenerative disorders. *Ann Clin Lab Sci*  
742 1997;27(1):11-25.
- 743 7. Matute C, Alberdi E, Domercq M, Pérez-Cerdá F, Pérez-Samartín A, Sánchez-Gómez  
744 MV. The link between excitotoxic oligodendroglial death and demyelinating diseases.  
745 *Trends in Neurosciences* 2001;24(4):224-30.
- 746 8. Owens T. The enigma of multiple sclerosis: inflammation and neurodegeneration cause  
747 heterogeneous dysfunction and damage. *Current Opinion in Neurology* 2003;16(3):259-  
748 65.
- 749 9. Smith KJ, Kapoor R, Felts PA. Demyelination: The role of reactive oxygen and nitrogen  
750 species. *Brain Pathology* 1999;9(1):69-92.
- 751 10. Ahn AC, Tewari M, Poon C-S, Phillips RS. The Clinical Applications of a Systems  
752 Approach. *PLoS Med* 2006;3(7):e209.
- 753 11. Auffray C, Chen Z, Hood L. Systems medicine: the future of medical genomics and  
754 healthcare. *Genome Med* 2009;1(1):2.

- 1  
2  
3 755 12. van Meeteren ME, Teunissen CE, Dijkstra CD, van Tol EAF. Antioxidants and  
4  
5 756 polyunsaturated fatty acids in multiple sclerosis. *Eur J Clin Nutr* 2005;59(12):1347-61.  
6  
7 757 13. Cunnane S, Ho S, Dore-Duffy P, Ells K, Horrobin D. Essential fatty acid and lipid  
8  
9 758 profiles in plasma and erythrocytes in patients with multiple sclerosis. *The American*  
10  
11 759 *Journal of Clinical Nutrition* 1989;50(4):801-06.  
12  
13  
14 760 14. Harbige LS ea. Polyunsaturated fatty acids in the pathogenesis and treatment of multiple  
15  
16 761 sclerosis. *Proc Nutr Soc* 2008;67:E21.  
17  
18 762 15. Wilson R, Tocher D. Lipid and fatty acid composition is altered in plaque tissue from  
19  
20 763 multiple sclerosis brain compared with normal brain white matter. *Lipids* 1991;26(1):9-  
21  
22 764 15.  
23  
24 765 16. Calder PC. n-3 Polyunsaturated fatty acids, inflammation, and inflammatory diseases.  
25  
26 766 *The American Journal of Clinical Nutrition* 2006;83(6):S1505-19S.  
27  
28 767 17. Piani D, Fontana A. Involvement of the cystine transport system xc- in the macrophage-  
29  
30 768 induced glutamate-dependent cytotoxicity to neurons. *The Journal of Immunology*  
31  
32 769 1994;152(7):3578-85.  
33  
34 770 18. Youdim KA, Martin A, Joseph JA. Essential fatty acids and the brain: possible health  
35  
36 771 implications. *International Journal of Developmental Neuroscience* 2000;18(4-5):383-  
37  
38 772 99.  
39  
40 773 19. Calder PC. Dietary modification of inflammation with lipids. *Proceedings of the*  
41  
42 774 *Nutrition Society* 2002;61(03):345-58.  
43  
44 775 20. Gil Á. Polyunsaturated fatty acids and inflammatory diseases. *Biomedecine &*  
45  
46 776 *Pharmacotherapy* 2002;56(8):388-96.  
47  
48 777 21. Ariel A, Serhan CN. Resolvins and protectins in the termination program of acute  
49  
50 778 inflammation. *Trends in Immunology* 2007;28(4):176-83.  
51  
52  
53  
54  
55  
56  
57  
58  
59  
60

- 1  
2  
3 779 22. Arita M, Ohira T, Sun Y-P, Elangovan S, Chiang N, Serhan CN. Resolvin E1 selectively  
4  
5 780 interacts with leukotriene B4 receptor BLT1 and chemR23 to regulate inflammation. *The*  
6  
7 781 *Journal of Immunology* 2007;178(6):3912-17.  
8  
9  
10 782 23. Janakiram NB, Rao CV. Role of Lipoxins and Resolvins as Anti-Inflammatory and  
11  
12 783 Proresolving Mediators in Colon Cancer. *Current Molecular Medicine* 2009;9(5):565-79.  
13  
14 784 24. Serhan C, Arita M, Hong S, Gotlinger K. Resolvins, docosatrienes, and neuroprotectins,  
15  
16 785 novel omega-3-derived mediators, and their endogenous aspirin-triggered epimers. *Lipids*  
17  
18 786 2004;39(11):1125-32.  
19  
20  
21 787 25. Serhan CN, Chiang N, Van Dyke TE. Resolving inflammation: dual anti-inflammatory  
22  
23 788 and pro-resolution lipid mediators. *Nat Rev Immunol* 2008;8(5):349-61.  
24  
25 789 26. Rossetti RG, Seiler C, DeLuca P, Laposata M, Zurier R. Oral administration of  
26  
27 790 unsaturated fatty acids: effects on human peripheral blood T lymphocyte proliferation.  
28  
29 791 *Journal of Leukocyte Biology* 1997;62(4):438-43.  
30  
31  
32 792 27. Vatassery G. Vitamin E and other endogenous antioxidants in the central nervous system.  
33  
34 793 *Geriatrics* 1998a;53(Suppl 1): S25-S27.  
35  
36 794 28. Fukuzawa K, Gebicki JM. Oxidation of [alpha]-tocopherol in micelles and liposomes by  
37  
38 795 the hydroxyl, perhydroxyl, and superoxide free radicals. *Archives of Biochemistry and*  
39  
40 796 *Biophysics* 1983;226(1):242-51.  
41  
42  
43 797 29. Christen S, Woodall AA, Shigenaga MK, Southwell-Keely PT, Duncan MW, Ames BN.  
44  
45 798  $\gamma$ -Tocopherol traps mutagenic electrophiles such as NO<sub>x</sub> and complements  $\alpha$ -tocopherol:  
46  
47 799 Physiological implications. *Proceedings of the National Academy of Sciences of the*  
48  
49 800 *United States of America* 1997;94(7):3217-22.  
50  
51  
52 801 30. Brigelius-Flohé R, Kelly FJ, Salonen JT, Neuzil J, Zingg J-M, Azzi A. The European  
53  
54 802 perspective on vitamin E: current knowledge and future research. *The American Journal*  
55  
56 803 *of Clinical Nutrition* 2002;76(4):703-16.  
57  
58  
59  
60



- 1  
2  
3 804 31. Calder P. Polyunsaturated fatty acids, inflammatory processes and inflammatory bowel  
4  
5 805 diseases *Mol. Nutr. Food. Res.* 2008;52:885–97  
6  
7 806 32. Edwards IJ, O'Flaherty JT. Omega-3 Fatty Acids and PPAR $\gamma$  in Cancer. *PPAR Research*  
8  
9 807 2008;2008:1-15.  
10  
11 808 33. Groeger AL, Cipollina C, Cole MP, Woodcock SR, Bonacci G, Rudolph TK, et al.  
12  
13 809 Cyclooxygenase-2 generates anti-inflammatory mediators from omega-3 fatty acids. *Nat*  
14  
15 810 *Chem Biol* 2010;6(6):433-41.  
16  
17  
18 811 34. Wymann MP, Schneider R. Lipid signalling in disease. *Nat Rev Mol Cell Biol*  
19  
20 812 2008;9(2):162-76.  
21  
22  
23 813 35. Dyall SC, Michael GJ, Michael-Titus AT. Omega-3 fatty acids reverse age-related  
24  
25 814 decreases in nuclear receptors and increase neurogenesis in old rats. *Journal of*  
26  
27 815 *Neuroscience Research* 2010;88(10):2091-102.  
28  
29  
30 816 36. Salvati S, Natali F, Attorri L, Di Benedetto R, Leonardi F, Di Biase A, et al.  
31  
32 817 Eicosapentaenoic acid stimulates the expression of myelin proteins in rat brain. *Journal*  
33  
34 818 *of Neuroscience Research* 2008;86(4):776-84.  
35  
36 819 37. Abraham M, Shapiro S, Karni A, Weiner HL, Miller A. Gelatinases (MMP-2 and MMP-  
37  
38 820 9) are preferentially expressed by Th1 vs. Th2 cells. *Journal of Neuroimmunology*  
39  
40 821 2005;163(1–2):157-64.  
41  
42  
43 822 38. Ffrench-Constant C. Pathogenesis of multiple sclerosis. *The Lancet* 1994;343(8892):271-  
44  
45 823 75.  
46  
47 824 39. Leppert D, Lindberg RLP, Kappos L, Leib SL. Matrix metalloproteinases:  
48  
49 825 multifunctional effectors of inflammation in multiple sclerosis and bacterial meningitis.  
50  
51 826 *Brain Research Reviews* 2001;36(2–3):249-57.  
52  
53  
54  
55  
56  
57  
58  
59  
60

- 1  
2  
3 827 40. Curtis CL, Rees SG, Cramp J, Flannery CR, Hughes CE, Little CB, et al. Effects of n-3  
4 fatty acids on cartilage metabolism. *Proceedings of the Nutrition Society*  
5 828  
6  
7 829 2002;61(03):381-89.
- 8  
9  
10 830 41. Harris MA, Hansen RA, Vidsudhiphan P, Koslo JL, Thomas JB, Watkins BA, et al.  
11  
12 831 Effects of conjugated linoleic acids and docosahexaenoic acid on rat liver and  
13  
14 832 reproductive tissue fatty acids, prostaglandins and matrix metalloproteinase production.  
15  
16 833 *Prostaglandins, Leukotrienes and Essential Fatty Acids* 2001;65(1):23-29.
- 17  
18  
19 834 42. McCabe A, Wallace J, Gilmore W, Strain J, McGlynn H. The effect of eicosapentanoic  
20  
21 835 acid on matrix metalloproteinase gene expression. *Lipids* 1999;34(0):S217-S18.
- 22  
23 836 43. Shinto L, Marracci G, Bumgarner L, Yadav V. The Effects of Omega-3 Fatty Acids on  
24  
25 837 Matrix Metalloproteinase-9 Production and Cell Migration in Human Immune Cells:  
26  
27 838 Implications for Multiple Sclerosis. *Autoimmune Diseases* 2011;2011.
- 28  
29  
30 839 44. McNamara RK. DHA Deficiency and Prefrontal Cortex Neuropathology in Recurrent  
31  
32 840 Affective Disorders. *The Journal of Nutrition* 2010;140(4):864-68.
- 33  
34 841 45. Huang WL, King VR, Curran OE, Dyall SC, Ward RE, Lal N, et al. A combination of  
35  
36 842 intravenous and dietary docosahexaenoic acid significantly improves outcome after  
37  
38 843 spinal cord injury. *Brain* 2007;130(11):3004-19.
- 39  
40  
41 844 46. Marangoni F, Angeli MT, Colli S, Eligini S, Tremoli E, Sirtori CR, et al. Changes of n -  
42  
43 845 3 and n - 6 fatty acids in plasma and circulating cells of normal subjects, after prolonged  
44  
45 846 administration of 20:5 (EPA) and 22:6 (DHA) ethyl esters and prolonged washout.  
46  
47 847 *Biochimica et Biophysica Acta (BBA) - Lipids and Lipid Metabolism* 1993;1210(1):55-  
48  
49 848 62.
- 50  
51  
52 849 47. Martínez M, Vázquez E, García-Silva MT, Manzanares J, Bertran JM, Castelló F, et al.  
53  
54 850 Therapeutic effects of docosahexaenoic acid ethyl ester in patients with generalized  
55  
56  
57  
58  
59  
60

- 1  
2  
3 851 peroxisomal disorders<sup>1</sup>. *The American Journal of Clinical Nutrition* 2000;71(1):376S-  
4  
5 852 85S.  
6  
7 853 48. Committee for medicinal products for human use. Guideline on clinical trials in small  
8  
9 854 populations European Medicines Agency, 2006:1-10.  
10  
11 855 49. Gerard E Dallal. The Little Handbook of Statistical Practice. In:  
12  
13 856 <http://www.tufts.edu/~gdallal/LHSP.HTM>, editor, 2008.  
14  
15  
16 857 50. Wang YC, Meyerson L, Tang YQ, Qian N. Statistical methods for the analysis of relapse  
17  
18 858 data in MS clinical trials. *Journal of the Neurological Sciences* 2009;285(1):206-11.  
19  
20  
21 859 51. Riccio P. The molecular basis of nutritional intervention in multiple sclerosis: a narrative  
22  
23 860 review. *Complement Ther Med* 2011;19(4):228-37.  
24  
25 861 52. Farinotti M, Simi S, Di Pietrantonj C, McDowell N, Brait L, Lupo D, et al. Dietary  
26  
27 862 interventions for multiple sclerosis (Review). *Cochrane Database Syst Rev* 2007(1, Art.  
28  
29 863 No.:CD004192.).  
30  
31  
32 864 53. Marvin MG. Multiple Sclerosis Review. *P&T* 2012;37(3):175-184  
33  
34 865 54. Polman CH, O'Connor PW, Havrdova E, Hutchinson M, Kappos L, Miller DH, et al. A  
35  
36 866 randomized, placebo-controlled trial of natalizumab for relapsing multiple sclerosis. *The*  
37  
38 867 *New England Journal of Medicine* 2006;354(9):899-910.  
39  
40  
41 868 55. Kappos L, Radue E-W, O'Connor P, Polman C, Hohlfeld R, Calabresi P, et al. A  
42  
43 869 placebo-controlled trial of oral fingolimod in relapsing multiple sclerosis. *The New*  
44  
45 870 *England Journal of Medicine* 2010;362(5):387-401.  
46  
47  
48 871 56. Mehta LR, Dworkin RH, Schwid SR. Polyunsaturated fatty acids and their potential  
49  
50 872 therapeutic role in multiple sclerosis. *Nature Clinical Practice Neurology* 2009;5(2):82-  
51  
52 873 92.  
53  
54  
55  
56  
57  
58  
59  
60

- 1  
2  
3 874 57. Rafat AS, Saame RS, Laura AS, Heidi RY, William S, Gary PZ. Omega 3-Fatty Acids:  
4  
5 875 Health Benefits and Cellular Mechanisms of Action. *Mini Reviews in Medicinal*  
6  
7 876 *Chemistry* 2004;4(8):859-71.  
8  
9  
10 877 58. Shaikh SR, Edidin M. Polyunsaturated fatty acids, membrane organization, T cells, and  
11  
12 878 antigen presentation. *The American Journal of Clinical Nutrition* 2006;84(6):1277-89.  
13  
14 879 59. Yao JK. Increased polyunsaturated fatty acids in developing and regenerating peripheral  
15  
16 880 nerve. *Biochimica et Biophysica Acta (BBA) - Lipids and Lipid Metabolism*  
17  
18 881 1982;712(3):542-46.  
19  
20  
21 882 60. Lajtha A, Toth J, Fujimoto K, Agrawal CH. Turnover of Myelin Proteins in Mouse Brain  
22  
23 883 in vivo. *Biochem. J.* 1977;164:323-29.  
24  
25 884 61. LeBaron FN, Sanyal S, Jungalwala FB. Turnover rate of molecular species of  
26  
27 885 sphingomyelin in rat brain. *Neurochemical Research* 1981;6(10):1081-89.  
28  
29  
30 886  
31  
32 887  
33  
34  
35 888  
36  
37  
38 889  
39  
40  
41  
42 890  
43  
44  
45 891  
46  
47  
48 892  
49  
50  
51  
52 893  
53  
54  
55 894  
56  
57  
58  
59  
60

1  
2  
3 895 **Figure legends**  
4

5  
6 896 **Figure 1.** Study Flowchart  
7

8  
9 897 **Figure 2.** Omega-6 and omega-3 PUFAs, their respective metabolic derivatives and their  
10  
11 898 possible effects on inflammation.  
12

13  
14  
15 899 After consumption, the PUFAs are metabolised via several pathways (not shown) to active  
16  
17 900 compounds that mediate inflammation and to products that promote the resolution of  
18  
19 901 inflammation.  
20

21  
22  
23 902 Abbreviations: PL, phospholipid; IFN- $\gamma$ , interferon  $\gamma$ ; IL-2, interleukin 2; NF $\kappa$ B, nuclear  
24  
25 903 factor kappa B; PGE<sub>2</sub>, prostaglandin E<sub>2</sub>; PPAR $\gamma$ , peroxisome proliferator-activated receptor  
26  
27 904  $\gamma$ ; PUFAs, polyunsaturated fatty acids; TGF $\beta$ , transforming growth factor  $\beta$ ; TNF, tumour  
28  
29 905 necrosis factor; COX, cyclooxygenase; hydroxyeicosatetraenoic acid; HPETE,  
30  
31 906 hydroperoxyeicosatetraenoic acid; LOX, lipoxygenase; LT, leukotriene; PG, prostaglandin;  
32  
33 907 TX, thromboxane; RXR- $\gamma$ , retinoid X receptor-gamma; Nrf2, nuclear respiratory factor;  
34  
35 908 MMP, metalloproteinase.  
36  
37

38  
39 909 **Figure 3.** Panel A demonstrates the ARR of the all-time on-study patients during the 24 mo  
40  
41 910 pre-treatment (baseline ARR) and at different on-study intervals (6, 12, 18, 24 mo) per  
42  
43 911 treatment arm. \*\*  
44

45  
46 912 Panel B demonstrates the ARR of the all-time on-study population between the 0-6, 6-12, 6-  
47  
48 913 18, and 6-24 mo period intervals for the PLP10 vs. placebo groups. \*\*  
49

50  
51 914 Panel C demonstrates the ARR of the all-time on-study population for the PLP10 vs. placebo  
52  
53 915 groups at baseline, during the 1<sup>st</sup> year, and during the 2<sup>nd</sup> year on-treatment. \*\*  
54  
55  
56  
57  
58  
59  
60

1  
2  
3 916 Panel D demonstrates the dispersion of relapses throughout the 2-year period of all-time on-  
4  
5 917 study (excluding patients on natalizumab) for PLP10 (n=10) vs. placebo (n=10). The placebo  
6  
7 918 group showed an irregular dispersion of relapses compared with the PLP10 group, with a  
8  
9 919 linear increasing trend, whereas the PLP10 group showed a stabilised linear trend. Using the  
10  
11 920 per-protocol model in which the patients on natalizumab were excluded, the number of  
12  
13 921 relapses could be compared on the same number of patients.  
14  
15

16  
17 922 \*\* Including the patients on natalizumab.  
18  
19

20 923 **Figure 4.** Panel 4A demonstrates the Kaplan–Meier plot of the time to sustained progression  
21  
22 924 of disability among the all-time on-study patients, excluding the patients on natalizumab,  
23  
24 925 receiving interventions A, PLP10 and C compared with placebo. PLP10 reduced the risk of  
25  
26 926 the sustained progression of disability by 86% over two years (p=0.006). Intervention  
27  
28 927 formula A reduced the risk of the sustained progression of disability by 53% (p=0.266), and  
29  
30 928 intervention formula C, by 67% (p=0.061).  
31  
32  
33

34 929 Panel 4B demonstrates the Kaplan–Meier plot of the time to sustained progression of  
35  
36 930 disability among the ITT population receiving interventions A, PLP10 and C compared with  
37  
38 931 placebo. PLP10 reduced the risk of the sustained progression of disability by 71% over two  
39  
40 932 years (p=0.052, trend). Intervention formula A reduced the risk of the sustained progression  
41  
42 933 of disability by 22% (p=0.727), and intervention formula C, by 40% (p=0.447).  
43  
44  
45

46 934 **Figure 5.** Mean change in the expanded disability status scale score as a function of visit  
47  
48 935 number. The values are expressed as the mean ± standard error of the mean (s.e.m.)  
49  
50

51 936 ¶ Including patients on natalizumab  
52  
53

54 937 ¶¶ Excluding patients on natalizumab  
55  
56  
57  
58  
59  
60

1  
2  
3  
4  
5  
6  
7 **A novel oral nutraceutical formula of omega-3 and omega-**  
8  
9  
10 **6 fatty acids with vitamins (PLP10) in relapsing remitting**  
11  
12  
13 **multiple sclerosis: a ~~randomized~~randomised, double-blind,**  
14  
15  
16 **placebo-controlled proof-of-concept clinical trial**

17  
18  
19 **Marios C. Pantzaris\***, **George N. Loukaides**, **Evangelia E. Ntzani**, **Ioannis**

20  
21 **S. Patrikios\***

22  
23  
24 \* Both M.C.P and I.S.P are the first authors and both are the corresponding authors  
25  
26  
27

28 The Cyprus Institute of Neurology and Genetics (CING) 1683 Nicosia, Cyprus Marios C.

29 Pantzaris Senior Consultant Neurologist Neurology Clinic C and PALUPA Medical Ltd., The

30 Cyprus Institute of Neurology and Genetics (CING) 1683 Nicosia, Cyprus George N.

31 Loukaides Clinical Dietitian/Nutritionist Neurology Clinic and PALUPA Medical Ltd.,

32 University of Ioannina School of Medicine (UISM) 45110 Ioannina, Greece Evangelia E.

33 Ntzani Assistant Professor Clinical and Molecular Epidemiology Unit, Department of

34 Hygiene and Epidemiology, PALUPA Medical Ltd at The Cyprus Institute of Neurology and

35 Genetics (CING) 1683 Nicosia, Cyprus Ioannis S. Patrikios Senior Research Scientist,

36 visiting Professor at European University Cyprus Nicosia, Cyprus, Department of Health and

37 Science. Correspondence should be addresses to e-mail: [I.Patrikios@euc.ac.cy](mailto:I.Patrikios@euc.ac.cy) or

38  
39  
40  
41  
42  
43  
44  
45  
46  
47 [pantzari@cing.ac.cy](mailto:pantzari@cing.ac.cy)

Formatted: English (U.S.)

Formatted: English (U.S.)

Formatted: English (U.S.)

Formatted: No underline, Font color: Auto, English (U.S.)

Field Code Changed

Field Code Changed

Formatted: English (U.S.)

Formatted: English (U.S.)







71  
72 **Results** A total of 41 (51%) patients completed the 30-month trial. Overall, for the per-  
73 protocol analysis of the two-year primary end point, 8 relapses were recorded in the PLP10  
74 group (n=10) (0.40 ARR) versus 25 relapses in the placebo group (n=12) (1.04 ARR),  
75 representing a 64% adjusted relative rate reduction for the PLP10 group (RRR 0.36, 95% CI  
76 0.15 to 0.87, p=0.024). In a subgroup analysis that excluded patients on monoclonal antibody  
77 (natalizumab) treatment, the observed adjusted RRR became stronger (72%) over the two  
78 years (RRR 0.28, 95% CI 0.10 to 0.79, p=0.016). The per-protocol analysis for the  
79 secondary outcome at two years, the time to disability progression, was significantly longer  
80 only with-for PLP10. The cumulative probability of disability progression at two years was  
81 10% in the PLP10 group and 58% in the placebo group (unadjusted log-rank p=0.019). In a  
82 subgroup analysis that excluded patients on natalizumab the cumulative probability of  
83 progression was 10% for the 10 patients in the PLP10 group and 70% for the 12 patients in  
84 the placebo group, representing a relative 86% decrease in the risk of the sustained  
85 progression of disability in the PLP10 group (unadjusted log-rank p=0.006; adjusted hazard  
86 ratio, 0.11; 95% CI 0.01 to 0.97, p=0.047). No adverse events were reported. Interventions A  
87 (10 patients) and C (9 patients) showed no significant efficacy.

88  
89 **Conclusions** In this small proof-of-concept ~~randomized-randomised~~ double-blind clinical  
90 trial, the PLP10 treatment significantly reduced the ARR, and the risk of sustained disability  
91 progression without any reported serious adverse events. Larger studies are needed to further  
92 assess the safety and efficacy of PLP10.

93  
94 **Trial registration** International Standard ~~Randomized-Randomised~~ Controlled Trial, number  
95 ISRCTN87818535.

Formatted: No underline, Font color: Auto, English (U.S.)

Formatted: English (U.S.)

Formatted: No underline, Font color: Auto, English (U.S.)

Formatted: English (U.S.)

Formatted: No underline, Font color: Auto, English (U.S.)

Formatted: No underline, Font color: Auto, English (U.S.)

Formatted: English (U.S.)



122 synergistic effect and provide ~~to give~~ a comprehensive, sustainable treatment effect  
 123 (Supplementary Information Methods 1).

124 ~~long, holistic and effective treatment (Supplementary Information Methods 1).~~

**Formatted:** No underline, Font color: Auto, English (U.S.)

**Formatted:** English (U.S.)

126 The polyunsaturated fatty acids (PUFA) composition of membrane phospholipids plays an  
 127 ~~direct important~~ role in immune- and non-immune-related inflammation. PUFA and  
 128 antioxidant deficiencies along with a decreased cellular antioxidant defense mechanisms have  
 129 been reported in MS patients.<sup>11</sup> The cause of ~~these~~ PUFA deficiencies is not entirely clear and  
 130 may involve metabolic and nutritional alterations.<sup>11</sup>

**Formatted:** No underline, Font color: Auto, English (U.S.)

**Formatted:** English (U.S.)

131 ~~Increased or uncontrolled inflammation contributes to several different acute and chronic~~

**Formatted:** English (U.S.)

132  ~~diseases, and it is characterized by the production of inflammatory cytokines, arachidonic~~

**Formatted:** Don't adjust space between Latin and Asian text, Don't adjust space between Asian text and numbers

134 Increased or uncontrolled inflammation contributes to several different acute and chronic  
 135 diseases, and it is characterized by the production of inflammatory cytokines, arachidonic  
 136 acid (AA)-derived eicosanoids (prostaglandins [PGs], thromboxanes [TXs], leukotrienes  
 137 [LTs], and other oxidized derivatives), and other inflammatory agents such as reactive  
 138 oxygen species (ROS), nitric oxide (NO), and adhesion molecules (Fig 2).<sup>12</sup> ~~During~~  
 139 ~~inflammation, glutamate homeostasis is altered by the release of increased quantities of~~  
 140 ~~glutamate by activated immune cells, which can result in the over-activation of glutamate~~  
 141 ~~receptors and, in turn, excitotoxic oligodendroglial death. During inflammation glutamate~~  
 142 ~~homeostasis is altered by activated immune cells releasing increased quantities of glutamate~~  
 143 ~~that can result in over activation of glutamate receptors and in return excitotoxic~~  
 144 ~~oligodendroglial death.~~<sup>7, 12, 13</sup> ~~As such, a~~mong others, membrane-related pathology,  
 145 immune-mediated inflammation, oxidative stress, and excitotoxicity provide potentially  
 146 useful combined targets for intervention in MS.

**Formatted:** No underline, Font color: Auto, English (U.S.)

**Formatted:** English (U.S.)

1  
2  
3  
4  
5  
6  
7  
8  
9  
10  
11  
12  
13  
14  
15  
16  
17  
18  
19  
20  
21  
22  
23  
24  
25  
26  
27  
28  
29  
30  
31  
32  
33  
34  
35  
36  
37  
38  
39  
40  
41  
42  
43  
44  
45  
46  
47  
48  
49  
50  
51  
52  
53  
54  
55  
56  
57  
58  
59  
60

147  
148 *In vitro* and *in vivo* studies have demonstrated that dietary eicosapentaenoic acid (EPA),  
149 docosahexaenoic acid (DHA), linoleic acid (LA), and gamma ( $\gamma$ )-linolenic acid (GLA) can be  
150 implicated and modulate almost all known complex network of events and pathways  
151 repertoire in MS pathophysiology. The Brain membrane fatty acid composition can be  
152 modified with dietary supplementation, but the process has been showed-shown to be age  
153 dependent (#-takesing much longer in adults versus developing brains) as-well-asand possibly  
154 dependent on the quantities-quantity of the dietary/supplemented PUFAs.<sup>14</sup> Both human and  
155 animal studies proved that diets high in DHA and EPA can increase the proportion of these  
156 PUFAs in the membranes of inflammatory cells and can also reduce the levels of AA, a  
157 stress-related biomarker.<sup>12, 14-15</sup> The anti-inflammatory properties of omega-3 include the  
158 production of PGs and TXs of the 3-series and LTs of the 5-series (Fig 2).<sup>14, 16</sup> Resolvins and  
159 protectins are biosynthesized-biosynthesised from omega-3 fatty acids via cyclooxygenase-  
160 2/lipoxygenase (COX-2/LOX) pathways and they promote control of inflammation in neural  
161 tissues (Fig 2).<sup>17-21</sup> T-cell proliferation in acute and chronic inflammation can be reduced by  
162 supplementation with either omega-6 or omega-3 PUFAs.<sup>22</sup> Furthermore, vitamin E is an  
163 important antioxidant that can interrupt the propagation of free radical chain reactions.<sup>23, 24</sup>  
164 Vitamin E (alpha-tocopherol, an isoform of vitamin E) efficiently detoxifies hydroxyl,  
165 perhydroxyl and superoxide free radicals, whereas.<sup>24</sup> However, γ-tocopherol (another  
166 isoform of vitamin E) seems-appears to be more efficiently implicated in trapping NO  
167 radicals.<sup>24, 25</sup> In addition alpha-tocopherol exerts non-antioxidant properties, including the  
168 modulation of cell signaling and immune functions, regulation of transcription, and induction  
169 of apoptosis.<sup>26</sup>

Formatted: Adjust space between Latin and Asian text, Adjust space between Asian text and numbers

Formatted: No underline, Font color: Auto, English (U.S.)

Formatted: Font: Not Italic, No underline, Font color: Auto, English (U.S.)

Formatted: English (U.S.)

1  
2  
3  
4  
5  
6  
7 171 Moreover, omega-3 fatty acids electrophilic derivatives formed by COX-2, in activated  
8  
9 172 macrophages can stimulate the nuclear respiratory factor (Nrf2), ~~which inducing induces~~ the  
10  
11 173 transcription of neuroprotective and antioxidant-related genes, and can activate the  
12  
13 174 peroxisome proliferator-activated receptor (PPAR) ~~γ~~ for ~~an~~ anti-inflammatory response.<sup>27-29</sup>  
14  
15 175 In animal studies, EPA and DHA proved to be endogenous ligands of RXRs, with positive  
16  
17 176 effects on neurogenesis.<sup>30</sup> Additionally, in 2008, Salvati and coworkers reported ~~evidense~~  
18  
19 177 ~~evidence~~ of accelerated myelination in DHA- and EPA-treated animals.<sup>32</sup> Moreover, DHA  
20  
21 178 and EPA ~~are-have been~~ reported to significantly decrease the levels of metalloproteinases  
22  
23 179 (MMP) -2, -3, -9, and -13, ~~with-which have~~ a significant role in the migration of lymphocytes  
24  
25 180 into the ~~central nervous system (CNS)~~ by inducing ~~the~~ disruption of the blood brain barrier  
26  
27 181 (BBB), an important step in the formation of MS lesions.<sup>33-39</sup>  
28  
29 182  
30 183 Based on the above ~~observations~~, specific PUFA and antioxidant vitamins fulfill the criterion  
31  
32 184 of biologic plausibility and have the potential to diminish ~~the severity and activity of~~ MS  
33  
34 185 symptoms ~~severity and activity~~, ~~potentially~~ even promoting recovery (remyelination).<sup>11</sup>  
35  
36 186 ~~Overall, PLP10 contains multiple ingredients (omega 3, omega 6 and other fatty acids and~~  
37  
38 187 ~~vitamins) potentially able to modulate key interconnected components (i.e. genes, proteins)~~  
39  
40 188 ~~and structural molecules (i.e. cellular membrane lipids, receptors) within the functional~~  
41  
42 189 ~~network of events of MS pathogenesis.~~<sup>40</sup>  
43  
44 190  
45 191 ~~We report here This is a~~ ~~randomized-randomised~~ phase II, single-center, double-blind,  
46  
47 192 placebo-controlled, proof-of-concept clinical trial evaluating the therapeutic ability of a  
48  
49 193 nutraceutical formula (with PLP10 representing the complete composition of the formulation)  
50  
51 194 and of two other interventions (A and C) consisting of PLP10-constituent partial fractions  
52  
53  
54  
55  
56  
57  
58  
59  
60

Formatted: No underline, Font color: Auto, English (U.S.)

Formatted: English (U.S.)

Formatted: No underline, Font color: Auto, English (U.S.)

Formatted: English (U.S.)

Formatted: No underline, Font color: Auto, English (U.S.)

Formatted: No underline, Font color: Auto, English (U.S.)

Formatted: No underline, Font color: Auto, English (U.S.)

195 containing ingredients for the aforementioned substance categories on relapsing remitting  
196 (RR) MS patients.

197 **Formatted:** English (U.S.)

198

199 **Methods**

**Formatted:** No underline, Font color: Auto, English (U.S.)

200 **Patients**

**Formatted:** English (U.S.)

201 The eligibility criteria were an age of 18 to 65; a diagnosis of RRMS according to the

**Formatted:** No underline, Font color: Auto, English (U.S.)

202 McDonald criteria; a score of 0.0 to 5.5 on the Expanded Disability Status Scale (EDSS), a

**Formatted:** English (U.S.)

203 rating that ranges from 0 to 10, with higher scores indicating more severe disability; MRI

**Formatted:** No underline, Font color: Auto, English (U.S.)

204 showing lesions consistent with MS; and at least one documented clinical relapse; and either

**Formatted:** No underline, Font color: Auto, English (U.S.)

205 receiving or not a disease modifying treatment (DMT) within the 24 months period before

**Formatted:** No underline, Font color: Auto, English (U.S.)

206 beginning (enrollment) inof the study. Patients were excluded because of a recent (<30 days)

**Formatted:** No underline, Font color: Auto, English (U.S.)

207 relapse, prior immunosuppressant or monoclonal antibodies-antibody therapy, pregnancy or

**Formatted:** No underline, Font color: Auto, English (U.S.)

208 nursing, other severe disease compromising organ function, progressive MS, history of recent

**Formatted:** No underline, Font color: Auto, English (U.S.)

209 drug or alcohol abuse, use of any additional food supplement, vitamins, or any form of

**Formatted:** No underline, Font color: Auto, English (U.S.)

210 PUFA, and history of severe allergic or anaphylactic reactions or known specific nutritional

**Formatted:** No underline, Font color: Auto, English (U.S.)

211 hypersensitivity. No monitor or limitations on the patients' daily diearyt habits were included

**Formatted:** No underline, Font color: Auto, English (U.S.)

212 considered in the study design since because the high quantities of the ingredients within the

**Formatted:** No underline, Font color: Auto, English (U.S.)

213 formula, s daily dosage ecould not be significantly affected or spoiled by any particular

**Formatted:** No underline, Font color: Auto, English (U.S.)

214 dietary pattern by any confounding factors within any known global daily food diet (see

**Formatted:** No underline, Font color: Auto, English (U.S.)

215 procedures, treatment regimen and end points).

**Formatted:** English (U.S.)

216

217 The study was conducted in accordance with the standards of the International Conference of

**Formatted:** No underline, Font color: Auto, English (U.S.)

218 Harmonization Guidelines for Good Clinical Practice. The protocol was developed by the

219 investigators and it was approved by the Cyprus National Bioethics Committee and was

1  
2  
3  
4  
5  
6  
7 220 | overseen by an independent safety-monitoring committee evaluating the safety and overall  
8  
9 221 | benefit-risk profiles. The adherence of care providers with the protocol was assessed by an  
10  
11 222 | external committee assigned by the funder of the project through reviews of case report  
12  
13 223 | forms. All patients gave written informed consent at the time of enrolment.

Formatted: English (U.S.)

### 16 225 | ~~Randomization~~ ~~Randomisation~~ and masking

Formatted: English (U.S.)

Formatted: English (U.S.)

17  
18 226 | Patients were randomly assigned to four intervention groups in a 1:1:1:1 ratio stratified by  
19  
20 227 | gender (women to men, 3:1). ~~Randomization~~ ~~Randomisation~~ was facilitated by a lottery-type  
21  
22 228 | pool of numbered balls. Patients were randomly assigned to treatment in blocks of four by  
23  
24 229 | flipping a coin as follows: for the first two drawn balls, heads stratified them to the groups  
25  
26 230 | A/B and tails stratified them to the groups C/D. The other two balls were stratified  
27  
28 231 | accordingly. A second toss of the coin assigned the two patients to group A (head)/B (tail) or  
29  
30 232 | group C (head)/D (tail). The ~~randomization~~ ~~randomisation~~ scheme was generated, performed  
31  
32 233 | and securely stored by the Helix Incubator Organization of Nicosia University (HIONU).

Formatted: No underline, Font color: Auto, English (U.S.)

33  
34 234 |  
35 235 | The interventions had identical appearance and smell and were kept in dark bottles (15 daily-  
36  
37 236 | dose portions/bottle) under nitrogen bed and labeled by HIONU with code numbers,  
38  
39 237 | unidentifiable-blinded for both patients and investigators. Study data were collected by the  
40  
41 238 | investigators and saved by the HIONU, which that also held the blinded codes of the study.

Formatted: No underline, Font color: Auto, English (U.S.)

Formatted: No underline, Font color: Auto, English (U.S.)

42  
43 239 | All study personnel involved in the conduct of the study were blinded throughout the study.

Formatted: No underline, Font color: Auto, English (U.S.)

44  
45 240 | The treating/examining physician, all other investigators, the pharmacist, the  
46  
47 241 | neuroradiologist and all patients were masked to treatment allocation.

Formatted: English (U.S.)

### 51 243 | Procedures and end points

Formatted: No underline, Font color: Auto, English (U.S.)

Formatted: English (U.S.)



1  
2  
3  
4  
5  
6  
7 244 The specific omega-3 (~~re-esterified glycerides~~) and omega-6 (~~glycerides~~) raw materials were  
8  
9 245 purchased according to the required interventions' PUFA-fraction specification (molecular  
10  
11 246 structure, quantity/ratio and quality) with vitamin E (alpha-tocopherol) used as antioxidant  
12  
13 247 ~~stabilizer-stabiliser~~ by the supplier. The vitamins and masking aroma were purchased  
14  
15 248 separately. The mixing of fractions to the final required intervention-composition  
16  
17 249 specification was always performed by the same team of scientists under the supervision of  
18  
19 250 the involved medical biochemist and lipidology specialist ~~and~~ under appropriate conditions  
20  
21 251 every six months. ~~The~~ interventions were ~~stored~~-refrigerated in ~~the~~ dark until use. See Table  
22  
23 252 1 and Supplementary Information Methods 1 and 2 for ~~the a detailed description of the~~  
24  
25 253 ~~interventions specification detailed description, and study/intervention rational.~~  
26  
27  
28 254  
29 255 ~~The~~ participants were randomly assigned to receive ~~the following~~: ~~in~~ group A, a daily dose  
30  
31 256 of a 19.5ml mixture of EPA (1,650mg) / DHA (4,650mg) / GLA (2,000mg) / LA (3,850mg) /  
32  
33 257 total other omega-3 (600mg) / total MUFA (1,714mg) + total SFA (18:0 160mg, 16:0  
34  
35 258 650mg) / vitamin A (0.6mg) / vitamin E (22mg) plus citrus-aroma (intervention A); ~~in~~ group  
36  
37 259 B PLP10, a daily dose of a 19.5ml mixture of EPA (1,650mg) / DHA (4,650mg) / GLA  
38  
39 260 (2,000mg) / LA (3,850mg) / total other omega-3 (600mg) / total MUFA (1,714mg) + total  
40  
41 261 SFA (18:0 160mg, 16:0 650mg) / vitamin A (0.6mg) / vitamin E (22mg) plus pure  $\gamma$ -  
42  
43 262 tocopherol (760mg) plus citrus-aroma (intervention B); ~~in~~ group C, a daily dose of a 19.5ml  
44  
45 263 mixture of pure  $\gamma$ -tocopherol (760mg) dispersed in pure virgin olive oil (16,137 mg) plus  
46  
47 264 citrus-aroma (intervention C); and ~~in~~ group D (placebo), a daily dose of a 19.5ml mixture of  
48  
49 265 pure virgin olive oil (16,930mg) plus citrus-aroma (intervention D) (Table 1). The  
50  
51 266 ~~institution's~~ pharmacist ~~of the institution~~ was responsible for the appropriate storage and  
52  
53 267 handling of the interventions ~~to for~~ the individual participants. The interventions were taken  
54  
55 268 orally once daily 30 minutes before dinner by ~~using~~ a dosage calibrated cup for 30 months.

Formatted: No underline, Font color: Auto, English (U.S.)

Formatted: English (U.S.)

Formatted: No underline, Font color: Auto, English (U.S.)

269 The ingredients, ratio and dose ~~have been were~~ selected based on their biophysical  
 270 interrelation ~~to with~~ the total known multiple MS ~~causing causative~~ factors, their biochemical  
 271 importance and the role ~~they were~~ expected to play in the normalisation and treatment of the  
 272 involved complex network of events in the disease pathophysiology. Moreover, the high  
 273 ~~intervention intake~~ dosage was ~~selected with the aim of optimising the body composition of~~  
 274 ~~omega-3 to omega-6 PUFAs to a 1:1 wt/wt ratio irrespective of dietary habits and~~  
 275 ~~geographical origin.~~  
 276 ~~used to overcome any abnormal dietary accumulation of related agents as a result of patients'~~  
 277 ~~food intake habits, irrespective of geographical origin, in relation to the daily consumption~~  
 278 ~~ratio of the total fatty acid intake; in order to end up with omega 3 to omega 6 PUFA~~  
 279 ~~indicated physiological body ratio composition of 1:1 wt/wt.~~

281 The period ~~beginning~~ from July 1<sup>st</sup> 2007 (enrollment) ~~until to~~ December 31<sup>st</sup> 2007 (~~entry~~  
 282 ~~baseline~~) was used ~~for as the normalization-normalisation~~ period. This six-month  
 283 ~~normalization-normalisation~~ period would allow the interventions' ~~agents~~ to exert their  
 284 beneficial effects ~~as (for the incorporation/normalization of cell membranes by oral PUFA,~~  
 285 ~~since they oral PUFAs~~ need four to six months to ~~achieve exert~~ pivotal action on immune and  
 286 neural cells, ~~a~~ correction of antioxidant ~~deficiency deficiencies~~ and body PUFA  
 287 ~~redistribution~~, and ~~an~~ optimal normalization of ~~the~~ EPA and DHA ~~levels/ratio~~.<sup>41-43</sup> The study  
 288 was completed on December 31<sup>st</sup> 2009 (~~30 months~~) and the recording of relapses continued  
 289 until December 31<sup>st</sup> 2010 (~~42 months~~). ~~More-Overall, clearly~~ the study included ~~the a~~  
 290 "normalization period" (July 1<sup>st</sup> 2007 to Dec 31<sup>st</sup> 2007), ~~the an~~ "on treatment" period (Jan 1<sup>st</sup>  
 291 2008 to Dec 31<sup>st</sup> 2009) and ~~the a~~ 12-month "post study ~~extended monitoring~~ period" (Jan 1<sup>st</sup>  
 292 2010– Dec 31<sup>st</sup> 2010).

Formatted: No underline, Font color: Auto, English (U.S.)

Formatted: English (U.S.)

Formatted: No underline, Font color: Auto, English (U.S.)

Formatted: English (U.S.)

294 Depending on their clinical status and in accordance with ~~the common practice~~ ~~the ethical~~  
 295 ~~issues governing clinical trials, the~~ participants continued receiving their ~~indicative~~ ~~indicated~~  
 296 regular ~~treatment~~, with persistent evaluation for any side-effects and adverse events.  
 297 Clinical ~~assessments~~ ~~assessmen visits~~ were scheduled at ~~entry~~ baseline, ~~and~~ 3, 9, 15, 21 and  
 298 24 months on-treatment. ~~The P~~patients were also clinically examined by the treating  
 299 neurologist within 48 hours after the onset of new or recurrent neurologic symptoms.  
 300  
 301 The primary end point was the ~~annualized relapse rate (ARR)~~ at two years. A relapse was  
 302 defined as new or recurrent neurologic symptoms not associated with fever or infection that  
 303 lasted for at least 24 hours and ~~was~~ accompanied by new neurologic signs. Relapses were  
 304 treated with methyl-prednisolone at a dose of 1g intravenous per day, for three days followed  
 305 by prednisone orally at a dose of 1mg/kg of weight per day on a tapering scheme for three  
 306 weeks. The secondary end point at two years was the time to ~~confirmed~~ disability  
 307 progression, defined as an increase of 1.0 or more on ~~the~~ EDSS ~~and~~ confirmed after six  
 308 months. ~~(p~~Progression could not be confirmed during a relapse) ~~and t~~The final EDSS score  
 309 was confirmed six months after the end of the study. ~~A post-hoc analysis was performed to~~  
 310 assess ~~ing~~ the proportion of patients free from new or enlarging T2 lesions on brain MRI  
 311 scans at the end of the study for the per-protocol participants of the group receiving the  
 312 ~~highest most~~ effective intervention versus placebo. ~~This C~~comparison was made versus the  
 313 available archival MRI scans up to three months before the enrolment date. ~~The~~ MRI scans  
 314 were performed and blindly analyzed at an MRI evaluation centre. The patients ~~continued to~~  
 315 ~~be followed~~ ~~were monitored~~ for ~~an~~ additional 12 months after completion of the trial and  
 316 relapses were recorded. ~~Finally, The~~ patients were strongly encouraged to remain in the study  
 317 for follow-up assessments even if they had discontinued the study drug.  
 318

Formatted: No underline, Font color: Auto, English (U.S.)

319 Blood samples were collected from all ~~randomized-randomised~~ patients at the time of  
 320 enrolment, at every scheduled clinical assessment and during relapses. To ~~check-evaluate the~~  
 321 ~~individual~~ compliance ~~with intake~~, the fatty acids composition of ~~the~~ patients' red blood  
 322 cells' membranes was determined, by gas chromatography, according to a standard protocol.  
 323 The fatty acid analyses were performed after study termination and thus did not influence the  
 324 blinding. Safety measures were assessed from the time of enrollment until 12 months  
 325 following the study completion. Haematological and biochemical tests were performed at  
 326 enrolment and every 12 months, including full blood count, renal and liver function tests, and  
 327 proteins, cholesterol, triglycerides, glucose and electrolyte levels.

**Formatted:** No underline, Font color: Auto, English (U.S.)

**Formatted:** No underline, Font color: Auto, English (U.S.)

**Formatted:** No underline, Font color: Auto, English (U.S.)

329 The involved neurologist was experienced with more than 20 years in practice. ~~He was and~~  
 330 trained to standardise ~~the~~ EDSS scoring procedures, examined patients, made all medical  
 331 decisions, determined the EDSS score and reviewed ~~the~~ adverse effects or side-effects. The  
 332 medical biochemist, ~~who was a~~ specialist ~~on-in~~ lipidology and immunology, and the  
 333 registered clinical dietitian, ~~were both~~ members of the ~~investigator-investigative~~ team ~~were~~  
 334 ~~experienced~~ with more than 25 years in practice. ~~The P~~ patients were able to contact the  
 335 ~~involved~~ neurologist at any time if there was any adverse event, side-effect or allergic  
 336 reaction. The study drug was not ~~suspected-expected~~ to have any clinical or laboratory  
 337 adverse effects different from ~~those of the~~ placebo that could disturb the double-blind nature  
 338 of the trial. Therefore, the ~~same~~ study-neurologist functioned as both the treating and  
 339 evaluating physician.

**Formatted:** No underline, Font color: Auto, English (U.S.)

**Formatted:** English (U.S.)

**Formatted:** No underline, Font color: Auto, English (U.S.)

**Formatted:** English (U.S.)

341 The whole procedure followed the clinical trial guidelines as required by the USA Food and  
 342 Drug Administration, European Medicines Agency, and the Committee for Medicinal  
 343 Products for Human Use.<sup>44</sup>

344

### 345 Statistical analysis

346 Power calculations could not be ~~done-performed~~ before the study because of the lack of  
347 information from previous studies on the potential effect sizes. In 2005, the prevalence of MS  
348 in Cyprus (600,000 population) was 120/100.000. Based on the aforementioned MS patients'  
349 numbers of our country and the ~~centre-of-reference~~ centre, the CING, we were able to enrol  
350 ~~the~~ 20% of the total RRMS patients eligible for treatment ~~in the trial~~. The sample size was  
351 strictly based on ~~this-the~~ subjects' availability ~~parameter~~ and the novelty of the assessed  
352 intervention.

Formatted: English (U.S.)

353

354 The ~~B~~baseline characteristics were compared across all intervention groups by ANOVA or  
355 the Kruskal-Wallis rank test for continuous variables and by mean Fisher's exact test for  
356 categorical variables, as appropriate.

357

358 For the primary outcome, the ARR was analysed in a pair-wise fashion for the active  
359 interventions compared with the ~~to~~ placebo using negative binomial regression models  
360 adjusted for the number of relapses within two years ~~before baseline~~, the EDSS score at  
361 baseline and DMT. The relapse rate was calculated as the total number of relapses divided by  
362 the total number of patient-years followed for each treatment group. ARR differences were  
363 also calculated among all comparable parameters and reported as the per-cent difference.

Formatted: No underline, Font color: Auto, English (U.S.)

Formatted: No underline, Font color: Auto, English (U.S.)

364

365 For the secondary end-point ~~outcome~~, the time to disability progression, Kaplan–Meier  
366 curves were constructed. The ~~P~~progression ~~to-of~~ disability and time thereof was compared in  
367 a pair-wise fashion for the active interventions versus placebo by the log-rank test in the main  
368 analysis and by the Cox proportional-hazards models with adjustment for the baseline EDSS

369 score, age and DMT in the supportive analysis. ~~Each test was performed with a significance~~  
 370 ~~level of 0.05.~~ Multivariate models considered all variables with P <0.1 ~~on in the~~ univariate  
 371 models. There was no overt violation of the proportionality assumption.

**Formatted:** No underline, Font color: Auto, English (U.S.)  
**Formatted:** English (U.S.)

373 Both, per-protocol and intention to treat (ITT) analyses were performed ~~for~~ for different sets of  
 374 research questions to be answered, and both are reported. Missing data of the five ~~lost to~~  
 375 ~~follow~~ patients ~~lost to follow-up~~ were imputed by ~~use of~~ the last-observation-carried-forward  
 376 (LOCF) approach. Due to the proof-of-concept design of the study, the considerable non-  
 377 adherence rate (49%) and the ~~resulting~~ interpretation issues ~~caused thereof~~ regarding the ITT  
 378 analysis, the per-protocol analysis ~~was considered to be the~~ ~~ing~~ more informative and  
 379 appropriate method approach to answer the research ~~addressed~~ questions ~~addressing of the~~  
 380 efficacy of the interventions when subjects ~~were~~ continuously ~~following~~ followed the  
 381 protocol. All statistical analyses were well defined a priori. All analyses were performed with  
 382 STATA SE 10.0 (College Station, TX, USA). P-values are two-tailed.

**Formatted:** No underline, Font color: Auto, English (U.S.)  
**Formatted:** No underline, Font color: Auto, English (U.S.)

384 **Role of the funding source**

**Formatted:** English (U.S.)  
**Formatted:** No underline, Font color: Auto, English (U.S.)  
**Formatted:** English (U.S.)  
**Formatted:** No underline, Font color: Auto, English (U.S.)

385 The funders had no role in study design, data collection and analysis, decision to publish, or  
 386 preparation of the manuscript. All members of the writing group had full access to all study  
 387 data and contributed to its interpretation and prepared, reviewed, and approved the  
 388 manuscript for submission. All authors had final responsibility for the decision to submit the  
 389 paper for publication.

**Formatted:** English (U.S.)

391 **Results**

**Formatted:** No underline, Font color: Auto, English (U.S.)

392 **Study population**

**Formatted:** English (U.S.)  
**Formatted:** No underline, Font color: Auto, English (U.S.)  
**Formatted:** English (U.S.)

393 ~~From July 2007 through December 2010 (including the 12 month extended period), a total~~  
 394 ~~of 80 MS patients were randomly assigned to a study group at the CING (tertiary~~  
 395 ~~neurological center).~~

Formatted: No underline, Font color: Auto, English (U.S.)

Formatted: English (U.S.)

397 Among the 80 patients, 20 patients were randomly assigned to each of the three groups to  
 398 receive the interventions, and 20 to receive placebo (Fig 1). ~~The B~~ baseline characteristics of  
 399 both the ITT and the per-protocol populations were similar across groups (Table 2A and 2B).

400 All patients ~~that who~~ dropped out ~~had a~~ completed ~~the~~ follow-up until ~~the~~ study completion  
 401 and were included in the ITT analyses (Table 4). Five patients were lost to follow-up before  
 402 their first scheduled visit. ~~Tand~~ two other patients ~~who that~~ dropped-out before their first  
 403 scheduled visit progressed to secondary progressive MS. Fifteen patients dropped-out  
 404 without successfully completing the “normalization” period, including five pregnancies.

405 Another 17 patients dropped-out early after ~~the~~ entry baseline. Seven patients ~~that who~~  
 406 dropped out were given monoclonal antibody treatment (natalizumab). Overall, a total of 41  
 407 (51%) patients completed the 42-month study (~~July 2007 through December 31<sup>st</sup> 2010,~~

Formatted: No underline, Font color: Auto, English (U.S.)

408 ~~including the 12 month extended period), where~~ one patient from group A and two from the  
 409 placebo group transferred on natalizumab, and 39 (49%) patients either withdrew (dropp-ed  
 410 out) or lost to follow. ~~The R~~ reasons for ~~study interventions~~ discontinuation are listed in  
 411 Figure 2.

Formatted: No underline, Font color: Auto, English (U.S.)

## 412 **Efficacy**

Formatted: English (U.S.)

## 413 **Relapses**

Formatted: No underline, Font color: Auto, English (U.S.)

Formatted: No underline, Font color: Auto, English (U.S.)

415 As a proof-of-concept trial, we primarily needed to answer whether the interventions were  
 416 effective for those MS patients who adhere to the assigned treatment, ~~which was~~ the per-  
 417 protocol analysis.<sup>45</sup> For ~~the sake of~~ methodological comprehensiveness, we also ~~present~~

1  
2  
3  
4  
5  
6  
7 418 | performed the ITT analysis as a secondary analysis, to answer ~~a~~ different questions; ~~that were~~  
8  
9 419 | complementary to our core hypothesis, such as; ~~like~~ what happened to all MS patients who  
10  
11 420 | were placed on the interventions (the effect of assignment).<sup>45</sup>  
12  
13 421 |

14 422 | ~~Regarding~~ In the per-protocol analysis, during the first year of treatment, the ARR was 0.80,  
15  
16 423 | 0.40, 0.78 and 0.83 for the four intervention groups respectively. During the second year, the  
17  
18 424 | ARR was 0.90, 0.40, 0.67 and 1.25 for the four intervention groups respectively. Overall, for

19  
20 425 | ~~the two-year primary end point~~, 8 relapses were recorded for the 10 patients in PLP10 group  
21  
22 426 | (0.40 ARR) versus 25 relapses for the 12 patients ~~in on the~~ placebo (1.04 ARR), a 64%  
23  
24 427 | adjusted relative rate reduction (RRR) for the PLP10 group (RRR 0.36, 95% confidence

25  
26 428 | interval [~~CI~~] 0.15 to 0.87, p=0.024) (Tables 3A, 5 and Fig 3A and 3C). ~~After~~ ~~Excluding~~  
27  
28 429 | patients on monoclonal antibody (natalizumab) treatment, the observed adjusted RRR

29  
30 430 | became stronger (72%) over the two years (RRR 0.28, 95% CI 0.10 to 0.79, p=0.016, Tables  
31  
32 431 | 3B and 5). Pair-wise comparisons for the other two groups against placebo did not yield

33  
34 432 | statistically significant results (Tables 3A, 3B). The proportion of patients with  $\leq 1$  relapse for  
35  
36 433 | the two years on-study was higher in the PLP10 group than in the placebo group (90% versus  
37  
38 434 | 42%, p=0.030, Table 5). Seeking to ~~investigate~~ further investigate the observed difference,

39  
40 435 | we compared the relapse rate during the 24 months before the entry into the study to the 24  
41  
42 436 | months on-treatment for each intervention group. We observed a statistically significant

43  
44 437 | ~~relative reduction in the ARR (70%) only in the PLP10 group (RRR 0.30; 95% CI 0.14 to~~  
45  
46 438 | 0.65, p=0.003, Table 3A); within-group comparisons for the ~~three other groups~~ ARR

47  
48 439 | reduction of the three other groups was were not significant and remained not significant

49  
50 440 | when the natalizumab--treated patients were further excluded from the analysis. The effect of  
51  
52 441 | PLP10 through time at different time-windows versus placebo for all-time on-study patients

53 442 | is shown in Figures 3A to 3D. ~~Although the~~ ~~The~~ ARR analysis; within time-windows; was not  
54  
55  
56  
57  
58  
59  
60

Formatted: No underline, Font color: Auto, English (U.S.)



1  
2  
3  
4  
5  
6  
7 443 an assigned endpoint, ~~but~~ it could help ~~in-with~~ the process of evaluating parallel information,  
8  
9 444 ~~such as the time needed for a specific treatment intervention activity to be evident, as well as~~  
10  
11 445 the efficacy profile through time. PLP10 reached ~~its~~ maximum effect within ~~a-one~~ year on-  
12  
13 446 treatment (counting from the entry baseline) and remained stable ~~afterwards~~ at an ARR of  
14  
15 447 0.4, ~~displaying a steadily reduced ARR with long- with some~~ free-relapse time-windows.  
16  
17 448 ~~These group B characteristics are considered important parameters of a successful MS~~  
18  
19 449 ~~treatment where the rule than the exception is the heterogeneity among patients' disease~~  
20  
21 450 ~~evolution. Specifically,~~ Figure 3D demonstrates the dispersion of relapses throughout the 2-  
22  
23 451 year period of all-time on-study (excluding patients on natalizumab) of PLP10 (n=10) versus  
24  
25 452 placebo (n=10). ~~The p~~Placebo group, in line with the existing knowledge of how relapse  
26  
27 453 history works in relation to future relapses ~~on-in~~ MS patients (contagion phenomenon),  
28  
29 454 ~~showed indicates~~ the expected ~~linearly increased~~ trend of ~~the increased~~ relapse incidences.<sup>46</sup>  
30  
31 455 The same phenomenon was true for ~~the~~ groups A and C. Finally, during the 12 month post-  
32  
33 456 study extended period, ~~the (January 1<sup>st</sup> 2010 to December 31<sup>st</sup> 2010) all time~~ on-study  
34  
35 457 patients ~~that-who~~ received PLP10, showed ~~a~~ persistent benefit in the ARR compared ~~with~~  
36  
37 458 ~~the~~ placebo (six relapses for the 10 subjects within PLP10 group, 0.6 ARR versus 19 for the  
38  
39 459 ~~12~~ subjects within placebo group, 1.58 ARR) indicating a statistically significant 62%  
40  
41 460 adjusted relative rate reduction in the ARR for the PLP10 group (RRR 0.38, 95% CI 0.12 to  
42  
43 461 0.99, p=0.046).

44  
45 463 Regarding the ITT analysis, ~~within PLP10 group, none of the nine drop-out patients changed~~  
46  
47 464 ~~to natalizumab and two out of nine discontinued because of pregnancy, whereas two out of~~  
48  
49 465 ~~seven drop-out patients from the placebo group changed to natalizumab (a total of four~~  
50  
51 466 ~~patients within the placebo arm population were on natalizumab, including the two patients~~  
52  
53 467 ~~that transferred while all time on study versus none within PLP10 group (Supplementary~~

Formatted: No underline, Font color: Auto, English (U.S.)

Information Fig 1). As reported, natalizumab reduces ARR by 68%, decreases the possibility of disability progression by 43% with 57% of patients free of new or enlarging T2 lesions on MRI scans compared to 15% on placebo.<sup>47</sup> The relapses of the drop-out patients are reported in Table 4A. As expected, no statistically significant differences in the ARR were calculated for the comparison of any group versus placebo for the 24 months on-treatment, with a 0.75 ARR within PLP10 (30 relapses) and 1.03 ARR within placebo (41 relapses) group, a 27% ARR reduction (Table 4B). The ITT population on DMT and/or on natalizumab is shown within the Supplementary Information Fig 1. Interestingly, despite the high non-adherence rate, there was a statistically significant difference for the comparison of the ARR in the 24 months before entry baseline to the 24 months on-treatment for the PLP10 group (RRR 0.45, 95% CI 0.26 to 0.78, p=0.005).

## Disability progression

Regarding In the per-protocol analysis, at two years, the time to disability progression, with confirmation after six months (secondary end point) was significantly longer only with PLP10. The cumulative probability of disability progression was 10% in the PLP10 group and 58% in the placebo group (p=0.019) (Supplementary Information Fig 2). After excluding excluding the patients on natalizumab, there was again a n-increased statistically significant difference between the PLP10 and the placebo groups for the same analysis (p=0.006) (Fig 4A). At two years, the cumulative probability of disability progression was 10% in the PLP10 group and 70% in the placebo group, which represents a decrease of 60 percentage points or a relative 896% decrease in the risk of the sustained progression of disability within within the PLP10 group (adjusted hazard ratio, 0.11; 95% CI 0.01 to 0.97, p=0.047). One versus seven out of ten patients progressed to confirmed disability in the PLP10 and the placebo groups, respectively, when patients on natalizumab were excluded. No statistically significant

Formatted: Font: (Default) Times New Roman, 12 pt, No underline, Font color: Auto, English (U.S.)

Formatted: Font: (Default) Times New Roman, 12 pt, No underline, Font color: Auto, English (U.S.)

Formatted: Font: (Default) Times New Roman, 12 pt, No underline, Font color: Auto, English (U.S.)

Formatted: Font: (Default) Times New Roman, 12 pt, No underline, Font color: Auto, English (U.S.)

Formatted: Font: (Default) Times New Roman, 12 pt, No underline, Font color: Auto, English (U.S.)

Formatted: Font: (Default) Times New Roman, 12 pt, Not Bold, No underline, Font color: Auto, English (U.S.)

Formatted: Font: (Default) Times New Roman, 12 pt, Not Bold, No underline, Font color: Auto, English (U.S.)

Formatted: Font: (Default) Times New Roman, 12 pt, No underline, Font color: Auto, English (U.S.)

Formatted: Font: (Default) Times New Roman, 12 pt, No underline, Font color: Auto, English (U.S.)

Formatted: No underline, Font color: Auto, English (U.S.)

1  
2  
3  
4  
5  
6  
7 493 | difference was observed for any comparison of the other two groups ~~compared to~~ with the  
8 494 | placebo group (Fig 4A and Supplementary Information Fig 2).

9  
10 495  
11  
12 496 | ~~Regarding In~~ the ITT analysis, at two years, the cumulative probability of progression was  
13 497 | 10% in the PLP10 group and 35% in the placebo group (p=0.052, a trend for an effect),  
14 498 | which represents a decrease of 25 percentage points or a relative 71% decrease ~~of for~~ the  
15 499 | PLP10 group with respect to the risk of sustained progression of disability (adjusted  
16 500 | ~~hazard ratio 0.22, 95% CI 0.04 to 1.07, p=0.06)~~ (Fig 4B). Two versus seven out of the total  
17 501 | randomized patients progressed to confirmed disability in the PLP10 and ~~the~~ placebo groups,  
18 502 | respectively. No significant differences were observed for groups A or C ~~against compared~~  
19 503 | with the placebo group (Fig 4B). The mean change in ~~Expanded Disability Status Scale (the~~  
20 504 | EDSS) score as a function of visit number is shown in Figure 5.

Formatted: Font: (Default) Times New Roman, 12 pt, No underline, Font color: Auto, English (U.S.)

Formatted: Font: (Default) Times New Roman, 12 pt, No underline, Font color: Auto, English (U.S.)

Formatted: Font: (Default) Times New Roman, 12 pt, No underline, Font color: Auto, English (U.S.)

Formatted: Font: (Default) Times New Roman, 12 pt, No underline, Font color: Auto, English (U.S.)

Formatted: Font: (Default) Times New Roman, 12 pt, No underline, Font color: Auto, English (U.S.)

Formatted: Font: (Default) Times New Roman, 12 pt, No underline, Font color: Auto, English (U.S.)

Formatted: English (U.S.)

## 506 MRI

507 | Over two years, the MRI results supported ~~the overall conclusion from the study that a~~  
508 | PLP10 ~~related has a~~ positive effect ~~on disease activity since as~~ only 29% from the PLP10  
509 | group, ~~in contrast as opposed~~ to 67% from the placebo group, developed new or enlarging T2  
510 | lesions (57% relative risk reduction). ~~After Excluding the~~ patients on natalizumab, there ~~is~~  
511 | ~~an~~ was an increased relative risk reduction (64%) ~~between for~~ PLP10 ~~as opposed compared~~  
512 | ~~with to the~~ placebo, with 29% of patients on PLP10 and 80% on placebo ~~with~~  
513 | ~~developing of~~ new or enlarging T2 lesions (Table 5).

Formatted: No underline, Font color: Auto, English (U.S.)

Formatted: No underline, Font color: Auto, English (U.S.)

## 515 Safety

516 | Over the course of the 30 month study, no significant adverse events were reported ~~from for~~  
517 | any group. ~~According to a returned questionnaire questioner procedure t~~The only ~~aetiology~~

1  
2  
3  
4  
5  
6  
7 518 reasonaetiology for the drop-outs was the palatability and smell of the formula preparations  
8  
9 519 in addition to pregnancy. Nausea was reported by two patients. No abnormal values were  
10  
11 520 observed on any of the biochemical and haematological blood tests. No allergic reactions  
12  
13 521 were reported.  
14  
15 522

Formatted: No underline, Font color: Auto, English (U.S.)

## 16 523 **Discussion**

Formatted: No underline, Font color: Auto, English (U.S.)

17  
18 524 In this proof-of-concept randomised, double-blind clinical trial assessing the safety and  
19  
20 525 clinical trial assessing the safety and efficacy of three variations of a novel cocktail  
21  
22 526 nutritional intervention formulas in RRMS, we observed a significant benefit association for  
23  
24 527 the novel thea formula containing a balanced mixture of specific omega-3 and omega-6  
25  
26 528 PUFAs, MUFAs, SFAs, vitamin A, vitamin E and  $\gamma$ -tocopherol, (PLP10) intervention  
27  
28 529 compared to with the placebo for both the ARR and the progression to disability in the per-  
29  
30 530 protocol analysis. Our results included analyses pertaining to a total of 42 months of study-  
31  
32 531 collected data, including the 12-month intervention-free treatment extension period. Our  
33  
34 532 results include analyses pertaining to a total of 42 months study collected data, including the  
35  
36 533 12 month, free of intervention treatment, extension period. We focused on the per protocol  
37  
38 534 data analysis since it is the appropriate method to best provide the answer to the proof of  
39  
40 535 concept trial addressed question. We also observed, aThe high drop-out rate that was mostly  
41  
42 536 the result of formulas palatability, a common phenomenon in trials using oily interventions  
43  
44 537 where a lot of patients tend to drop out soon after first dosage. We thus present our main per  
45  
46 538 protocol analysis, as well as a subgroup analysis excluding patients on natalizumab.  
47  
48 539 Interestingly, a We have found a statistically significant reduction in the ARR and the  
49  
50 540 disability progression was also observed when comparing not only patients on PLP10 versus  
51  
52 541 placebo but also comparing the ARR of the PLP10 patients in the 24-month period prior to  
53  
54 542 the study to with the ARR of the 24 months on-study; the observed differences became

Formatted: No underline, Font color: Auto, English (U.S.)

1  
2  
3  
4  
5  
6  
7  
8  
9  
10  
11  
12  
13  
14  
15  
16  
17  
18  
19  
20  
21  
22  
23  
24  
25  
26  
27  
28  
29  
30  
31  
32  
33  
34  
35  
36  
37  
38  
39  
40  
41  
42  
43  
44  
45  
46  
47  
48  
49  
50  
51  
52  
53  
54  
55  
56  
57  
58  
59  
60

543 larger when patients that received natalizumab (the ~~currently~~ most potent disease modifier)  
 544 were excluded. The ARR decreased within a year on PLP10 and ~~significantly~~ remained stable  
 545 until ~~the~~ study completion. ~~The S~~statistically significant ~~in the~~ difference of ARR between  
 546 patients on PLP10 ~~versus and those on~~ placebo continued for the ~~additional~~ 12 month  
 547 ~~extended period (persistent effect) without a significant difference on the DMT after the~~  
 548 ~~study extended period (persistent effect) without significant differences on DMT~~. These  
 549 clinical findings are supported by the results ~~regarding from~~ the MRI analysis ~~where in which~~  
 550 the proportion of patients free from new or enlarging brain T2 lesions was also higher in ~~the~~  
 551 ~~PLP10 group versus than the~~ placebo ~~group~~. The persistent effect within the extended period  
 552 ~~it is considered believed to be~~ of major importance and supportive of the results since it is in  
 553 ~~agreement with the very long washouts, reported necessary, for omega 3 fatty acids and~~  
 554 ~~especially DHA to return towards pretreatment values within the fatty acids of plasma,~~  
 555 ~~platelets, monocytes and red blood cells.~~<sup>42</sup> This study also provides important 30 month,  
 556 ~~placebo controlled information about the safety of PLP10, A and C interventions.~~ No severe  
 557 side effects have been reported.

558

559 ~~As medications used to treat MS become increasingly highly specific and potent, attention to~~  
 560 ~~safety is paramount. Current available treatments are products of reductionism, partially~~  
 561 ~~effective, associated with severe side effects without (re)myelinating or neuroprotective~~  
 562 ~~abilities.~~

563 ~~To the best of our knowledge, this study is the first randomized clinical trial assessing the~~  
 564 proposed combination of active ingredients in a standardized proportion and dosing scheme for  
 565 MS treatment designed according to the systems medicine approach. Nutrition is commonly  
 566 accepted as one of the possible environmental factors involved in the pathogenesis of MS, but  
 567 its role as a complementary MS treatment is unclear and largely disregarded.<sup>51</sup> It is well

- Formatted: No underline, Font color: Auto, English (U.S.)
- Formatted: No underline, Font color: Auto, English (U.S.)
- Formatted: No underline, Font color: Auto, English (U.S.)
- Formatted: No underline, Font color: Auto, English (U.S.)
- Formatted: No underline, Font color: Auto, English (U.S.)
- Formatted: No underline, Font color: Auto, English (U.S.)
- Formatted: No underline, Font color: Auto, English (U.S.)
- Formatted: No underline, Font color: Auto, English (U.S.)
- Formatted: No underline, Font color: Auto, English (U.S.)
- Formatted: English (U.S.)
- Formatted: English (U.S.)
- Formatted: Font: (Default) Times New Roman, 12 pt, No underline, Font color: Auto, English (U.S.), Not Highlight
- Formatted: Font: (Default) Times New Roman, No underline, Font color: Auto
- Formatted: Font: (Default) Times New Roman, 12 pt, No underline, Font color: Auto, English (U.S.), Not Highlight
- Formatted: Font: (Default) Times New Roman, No underline, Font color: Auto
- Formatted: Font: (Default) Times New Roman, 12 pt, No underline, Font color: Auto, English (U.S.), Not Highlight
- Formatted: No underline, Font color: Auto, Not Highlight

1  
2  
3  
4  
5  
6  
7 568 known that the majority of the patients suffering from MS do use dietary supplements for a  
8  
9 569 variable length of time.<sup>52</sup> Dietary antioxidants and fatty acids may influence the disease  
10  
11 570 process in MS by reducing immune-mediated inflammation, oxidative stress and excitotoxic  
12  
13 571 damage.<sup>12</sup> Published data have revealed that healthy dietary molecules have a pleiotropic role  
14  
15 572 and are able to change cell metabolism and down-regulate inflammation by interacting with  
16  
17 573 enzymes, nuclear receptors and transcriptional factors.<sup>51</sup> Current available treatments are the  
18  
19 574 products of reductionism, partially effective and associated with severe side effects.  
20  
21 575 Interferons and glatiramer acetate, the most widely used first-line MS drugs available today,  
22  
23 576 are associated with the least severe side effects among the MS therapies, but they are reported  
24  
25 577 to reduce the ARR only by about one third and with no significant effect on the progression  
26  
27 578 of disability.<sup>53</sup> Natalizumab reduces the ARR by 68% and decreases the possibility of  
28  
29 579 disability progression by 43%, with 57% of patients free of new or enlarging T2 lesions on  
30  
31 580 MRI scans, compared with 15% on placebo.<sup>54</sup> Fingolimod is associated with a 54% ARR  
32  
33 581 reduction (without a significant benefit on the progression of disability). Both natalizumab  
34  
35 582 and fingolimod are second-line drugs associated with severe side-effects.<sup>55</sup>  
36  
37 583 ~~efficacy of a~~ After a thorough search in the literature we are convinced that no existing MS  
38  
39 584 ~~treatment module has ever been designed according to as a result of the SM systems~~  
40  
41 585 ~~medicine concept approach, or with a potential to effectively stimulate intrinsic~~  
42  
43 586 ~~remyelinating and neuroprotecting mechanisms or exert such an action.~~ Now w  
44  
45 587 Mehta in a review paper, in 2009, reported different clinical studies on interventions  
46  
47 588 formulated based on the individual aforementioned molecular ingredients or based on a  
48  
49 589 specific ratio of the aforementioned molecular ingredients for MS treatment; although no one  
50  
51 590 was reported using the antioxidant vitamin  $\gamma$ -tocopherol.<sup>56</sup> In our study, the choice of  
52  
53 591 ingredient proportion and dosing scheme was based upon evidence derived form *in vivo* and  
54  
55 592 *in vitro* data. In the Western diet, the ratio of omega-3 to omega-6 is about 1:20–30; in

**Formatted:** No underline, Font color: Auto, Not Highlight

**Formatted:** Font: 12 pt, No underline, Font color: Auto, English (U.S.), Not Highlight

**Formatted:** Font: 12 pt, No underline, Font color: Auto, English (U.S.)

**Formatted:** No underline, Font color: Auto, English (U.S.)

1  
2  
3  
4  
5  
6  
7 593 populations that consume fish-based diets, the ratio is about 1:1–2.<sup>52,53</sup> The intervention daily  
8  
9 594 dose was designed aiming and believed to be high enough to restore/amplify body efficient  
10  
11 595 antioxidant activity and ensure cellular membranes lipid profile normalization (PUFA  
12  
13 596 content) and simultaneously potentiate involvement of the ingredients in the anti-  
14  
15 597 inflammatory and recovery mechanisms. Diet fatty acid molecules need about a six months  
16  
17 598 period to exert their beneficial effect and this essential parameter was for the first time under  
18  
19 599 consideration in our study design (normalization period).<sup>42</sup> This chronotherapy parameter  
20  
21 600 might be of major importance and is in line with the systems medicine treatment philosophy.  
22  
23 601 We believe that the persistent effect within the post-study period is in agreement with the  
24  
25 602 reported very long washout phase for omega-3 fatty acids, especially DHA, to return to the  
26  
27 603 pre-treatment values.<sup>46</sup> Considering that omega-3 supplementation can release and replace  
28  
29 604 excess AA within the cellular membranes, we can speculate that an increased inflammatory  
30  
31 605 activity can possibly result during the first six months of supplementation.  
32  
33 606

34 607 In addition to the EPA, DHA, LA, and GLA, PLP10 contained limited quantities of other  
35  
36 608 structural/active PUFAs, specific MUFAs (mostly oleic acid) and SFAs (palmitic and stearic  
37  
38 609 acid), specifically to provide a direct source for neuronal cell membranes rehabilitation and  
39  
40 610 for (re)myelination and neuroprotection because these compounds are all major components,  
41  
42 611 precursors and building blocks of any new physiological myelin and cellular membranes in  
43  
44 612 general. Assembly of the correct molecules into the myelin membrane may be especially  
45  
46 613 critical during active synthesis. If these critical constituents aren't directly or indirectly  
47  
48 614 available, amyelination, dysmyelination or demyelination may ensue.<sup>56</sup> The maintenance of  
49  
50 615 myelin requires continued turnover of its components throughout life.<sup>54,55</sup>  
51  
52 616

1  
2  
3  
4  
5  
6  
7 617 Different factors and molecular entities appear to be part of the possible aetiology for MS,  
8  
9 618 with specific PUFA and antioxidants found to be key substances related to all known  
10  
11 619 pathogenic and recovery mechanisms. In our study, we further proposed that a holistic  
12  
13 620 systems medicine model approach can be applied by synchronized action. First, there is an  
14  
15 621 obvious convenience in administering one formula containing different specific active  
16  
17 622 ingredients. The currently available evidence supports that nutritional interventions would  
18  
19 623 confer a small to medium treatment effect with an accompanying appropriate safety profile.<sup>12</sup>  
20  
21 624 <sup>52 56</sup> Combining these specific active ingredients together with  $\gamma$ -tocopherol and other specific  
22  
23 625 active molecules into one stable formulation is expected to enhance adherence while still  
24  
25 626 offering an appropriate safety profile. A similar approach could not be adopted for  
26  
27 627 pharmaceutical interventions with common and severe adverse events, such as those  
28  
29 628 indicated today for patients with MS. Given the advantages of the simultaneous use and that  
30  
31 629 all the included ingredients have proven individually a valid biological plausibility and have  
32  
33 630 been tested in various settings and under various dose schemes, we also assessed the  
34  
35 631 hypothesis that a novel mixture of these ingredients would have a postulated efficacy attained  
36  
37 632 synergistically through different mechanisms of action.<sup>52 56</sup> Interestingly, the observed  
38  
39 633 magnitude of the treatment effect cannot be explained by adding up the postulated efficacy  
40  
41 634 estimates of the individual ingredients. Findings from *in vitro* and *in vivo* studies support this  
42  
43 635 notion of proposed synergy although this hypothesis can only be taken forward when the  
44  
45 636 observed treatment effect is validated in various settings and in a larger number of patients.  
46  
47 637  
48  
49 638 We acknowledge that our study has two considerable limitations: the small sample size and  
50  
51 639 the high drop-out rate. Regarding the sample size, one should bear in mind that this study is a  
52  
53 640 small, phase-2 clinical trial assessing a novel intervention and thus has comparable size in the  
54  
55 641 appropriate literature. Questions taken forward from this trial can be assessed in a larger

Formatted: Font: (Default) Times New Roman, No underline, Font color: Auto

Formatted: Font: (Default) Times New Roman, No underline, Font color: Auto

Formatted: English (U.K.)



1  
2  
3  
4  
5  
6  
7 642 [randomised trial in which appropriate power calculations would be possible, taking into](#)  
8 643 [consideration the findings of the present study. The adherence of the subjects is another](#)  
9 644 [limitation of our study, but the total duration of the study that covers a total of 42 months](#)  
10 645 [follow-up adds power to the results.<sup>48</sup> We acknowledge that we had to deliver the](#)  
11 646 [intervention in the way most frequently associated with low compliance, i.e., an oral, liquid](#)  
12 647 [formula, thus triggering maximum intolerance due to taste. Nevertheless, the observed](#)  
13 648 [suboptimal compliance is in accordance with the published literature in which clinical trials](#)  
14 649 [assessing liquid fatty acid interventions show a weaker adherence compared with clinical](#)  
15 650 [trials of pharmaceutical interventions. Indeed, in our study, we consistently recorded the](#)  
16 651 [reasons for withdrawal: most of the participants did not discontinue due to safety issues, but](#)  
17 652 [rather due to palatability issues. Controlling non-compliance due to palatability issues is by](#)  
18 653 [far easier to address compared with non-compliance related to adverse events and can be](#)  
19 654 [resolved when optimisation of the formulation is achieved in future trials. At this stage of the](#)  
20 655 [development of the intervention, we would by far exceed the cost-effectiveness threshold if](#)  
21 656 [we were to invest in improving these features of the intervention. Moreover, we should also](#)  
22 657 [note that MS patients are subject to far more frequent and more serious adverse events related](#)  
23 658 [to the current standard treatments.](#)

24 659  
25 660 [As a direct consequence of the low compliance and the loss of power, the performed](#)  
26 661 [intention-to-treat analysis was far less robust than intended, and we would then have to take](#)  
27 662 [into serious consideration the performed per-protocol analysis. We focused on the per-](#)  
28 663 [protocol data analysis because it is the appropriate method to best provide the answer for the](#)  
29 664 [proof-of-concept trial-addressed question.<sup>24</sup> To validly incorporate the results of the per-](#)  
30 665 [protocol analysis into the interpretation of the overall results of the trial, we needed to ensure](#)  
31 666 [that the randomisation was not seriously violated due to the exclusion of the non-compliers.](#)

1  
2  
3  
4  
5  
6  
7 667 The comparison between the baseline characteristics of the patients included in the per-  
8  
9 668 protocol analysis did show a relative balance in the compared groups for known confounders.  
10  
11 669 Nevertheless, the presence of unknown confounders introducing bias to the trial results  
12  
13 670 cannot be excluded despite non- significant differences in the baseline characteristics. As an  
14  
15 671 additional safeguard towards that end, we also performed adjusted analyses for the primary  
16  
17 672 and secondary analyses for important clinical and demographic parameters, i.e., relapses,  
18  
19 673 EDSS, age and DMT.

20 674  
21  
22 675 We proposed that a holistic SM model approach has to be applied by synchronized action on  
23  
24 676 all the involved perturbed mechanisms. Although, all the included ingredients have proven  
25  
26 677 individually a valid biological plausibility and have been tested in various settings and under  
27  
28 678 various dose schemes (REFS HERE), we assessed the hypothesis that a novel mixture of this  
29  
30 679 ingredients PLP10 has a innovative characteristics with a ppostulated efficacy attained  
31  
32 680 through different mechanisms of action and probably by the synergistic effect of its  
33  
34 681 constituent ingredients. Reasons thereof other than the obvious convenience of administering  
35  
36 682 one formula containing different active ingredients, are . Moreover, the currently available  
37  
38 683 evidence supports that nutritional interventions would confer a small to medium treatment  
39  
40 684 effect (ref). The notion of combining these interventions into one stable formulation would be  
41  
42 685 expected to provide a maximum adherence with a appropriate safety profile. An similar  
43  
44 686 approach could not be adopted for pharmaceutical interventions with common and severe  
45  
46 687 adverse events such as these indicated today for the MS patients., PLP10 has all the  
47  
48 688 characteristics of a medical food with the action to feed a normal metabolic process by  
49  
50 689 supplying nutritional structural membrane precursors, building blocks, and vitamins from  
51  
52 690 dietary sources that enhance remyelination and neuroprotection and simultaneously promote

**Formatted:** Font: 12 pt, No underline, Font color: Auto, English (U.S.)

**Formatted:** Font: 12 pt, No underline, Font color: Auto, English (U.S.)

**Formatted:** Font: 12 pt, No underline, Font color: Auto, Highlight

**Formatted:** Font: 12 pt, No underline, Font color: Auto, English (U.S.)

**Formatted:** Font: 12 pt, No underline, Font color: Auto, English (U.S.)

1  
2  
3  
4  
5  
6  
7 691 normalization of all cellular membranes lipid content. The intention is to normalize the  
8 692 specific nutritional requirements of the MS patients.  
9  
10 693  
11  
12 694 Interestingly, in this small phase II trial, we observed a far larger treatment effect than  
13  
14 695 expected. One explanation could be maximum synergistic effect observed when  
15  
16 696 simultaneously administering the assessed ingredients. Findings from in vitro and in vivo  
17  
18 697 studies could support this notion. Nevertheless, this hypothesis can only be taken forward  
19  
20 698 when Different factors and molecular entities appear to be part of the possible aetiology for  
21  
22 699 MS with specific PUFA and antioxidants found to be key substances related to all known  
23  
24 700 pathogenic and recovery mechanisms. But, it is well established that MS patients are  
25  
26 701 characterized with significant deficiencies in antioxidant efficiency as well as in PUFA levels  
27  
28 702 in blood and cellular membranes.<sup>41, 49-51</sup>  
29  
30 703  
31  
32 704 According to one hypothesis, the change in the ratio of omega 3 to omega 6, due to the  
33  
34 705 increasing consumption of omega 6 PUFA and resulting in, meaning high accumulation of  
35  
36 706 AA, in the Western diet, may be one of the major factors responsible for the increasing  
37  
38 707 incidence of inflammatory diseases relative to populations. In the Western diet, the ratio of  
39  
40 708 omega 3 to omega 6 is about 1:20-30; in populations that consume fish-based diets, the ratio  
41  
42 709 is about 1:1-2.<sup>52-53</sup> The intervention daily dose was designed aiming and believed to be high  
43  
44 710 enough to restore/amplify body efficient antioxidant activity and ensure cellular membranes  
45  
46 711 lipid profile normalization (PUFA content) and simultaneously potentiate involvement of the  
47  
48 712 ingredients in the anti-inflammatory and recovery mechanisms. Diet fatty acid molecules  
49  
50 713 need about a six months period to exert their beneficial effect and this essential parameter  
51  
52 714 was for the first time under consideration in our study design (normalization period).<sup>42</sup> This  
53  
54 715 chronotherapy parameter it is of major importance in line with the SM treatment philosophy

Formatted: English (U.S.)

Formatted: English (U.S.)

Formatted: No underline, Font color: Auto, Highlight

Formatted: No underline, Font color: Auto, English (U.S.)

Formatted: No underline, Font color: Auto, English (U.S.)

Formatted: No underline, Font color: Auto, English (U.S.)

1  
2  
3  
4  
5  
6  
7 716 We believe that the persistent effect within the post study period is in agreement with the  
8  
9 717 reported very long washout phase for omega 3 fatty acids, especially DHA, to return to the  
10  
11 718 pre treatment values.<sup>46</sup> and if it is not included in the trial design the possibility of misleading  
12  
13 719 result evaluation greatly increases. In fact, considering that omega 3 supplementation can  
14  
15 720 release and replace excess AA within the cellular membranes, we can speculate that an  
16  
17 721 increased inflammatory activity can possibly result during the first six months of  
18  
19 722 supplementation (during normalization period).  
20  
21 723

22 724 The maintenance of myelin requires continued turnover of its components throughout life.<sup>54,55</sup>  
23  
24 725 In addition to the EPA, DHA, LA, and GLA, PLP10 was containing limited quantities of  
25  
26 726 other structural PUFA, specific MUFA (mostly oleic acid) and SFA (palmitic and stearic  
27  
28 727 acid), specifically aiming to provide a direct source for neuronal cell membranes  
29  
30 728 rehabilitation and for (re)myelination and neuroprotection since they are all major  
31  
32 729 components, precursors and building blocks of any new physiological myelin and cellular  
33  
34 730 membranes in general. Assembly of the correct molecules into myelin membrane may be  
35  
36 731 especially critical during active synthesis. Possibly, if critical constituents aren't available or  
37  
38 732 are metabolically blocked, amyelination, dysmyelination or demyelination may ensue.<sup>56</sup>  
39  
40 733

41 734 We acknowledge that our study has two considerable limitations pertaining to the small  
42  
43 735 sample size and the high drop out rate. Regarding the sample size, one has to bear in mind  
44  
45 736 that this is a small, phase 2 clinical trial assessing a novel intervention and has thus  
46  
47 737 comparable size in the relative literature. Questions taken forward from this trial can be  
48  
49 738 assessed in a larger randomized trial where appropriate power calculations would be possible  
50  
51 739 taking into consideration the findings of the present study. The adherence of the subjects is  
52  
53 740 another limitation of our study since almost half of the participants withdrew. We  
54  
55  
56  
57  
58  
59  
60

Formatted: No underline, Font color: Auto, English (U.S.)

Formatted: No underline, Font color: Auto, English (U.S.)

Formatted: No underline, Font color: Auto, English (U.S.)

Formatted: English (U.S.)

1  
2  
3  
4  
5  
6  
7 741 acknowledge that we had to deliver the intervention in the way most frequently associated  
8 742 with low compliance, i.e. oral, liquid formula, thus triggering maximum intolerance due to  
9 743 taste. Nevertheless, the observed suboptimal compliance is in accordance with the published  
10 744 literature where clinical trials assessing liquid fatty acid interventions show a weaker  
11 745 adherence compared to clinical trials of pharmaceutical interventions. Indeed, in our study,  
12 746 we consistently recorded the reasons of withdrawal and most of the participants did not  
13 747 discontinue due to safety issues, but mostly in relation to palatability issues. Controlling non-  
14 748 compliance due to palatability issues is by far easier to deal with compared to non-  
15 749 compliance related to adverse events and can be resolved when optimization of the  
16 750 formulation is achieved in future trials. At this stage of the development of the intervention,  
17 751 we would by far exceed the cost effectiveness threshold if we were to invest in improving  
18 752 these features of the intervention. Moreover, we should also note that MS patients are subject  
19 753 to far more frequent and more serious adverse events related to the current standard  
20 754 treatment.

21  
22  
23  
24  
25  
26  
27  
28  
29  
30  
31  
32  
33  
34 755  
35 756 As a direct consequence of the low compliance and the loss of power, the performed  
36 757 intention to treat analysis was far less robust than intended and we would then have to take  
37 758 into serious consideration the performed pre-protocol analysis. In order to validly incorporate  
38 759 the results of the pre-protocol analysis into the interpretation of the overall results of the trial,  
39 760 we needed to ensure that the randomization was not seriously violated due to the exclusion of  
40 761 the non-compliers. The comparison between the baseline characteristics of the patients  
41 762 included in the per protocol analysis did show a relative balance in the compared groups for  
42 763 known confounders. Nevertheless, the presence of unknown confounders introducing bias in  
43 764 the trial results cannot be excluded despite non-statistically significant differences in the  
44 765 baseline characteristics. As an additional safeguard towards that end, we also performed

1  
2  
3  
4  
5  
6  
7 766 ~~adjusted analyses for the primary and secondary analyses for important clinical and~~  
8 ~~demographic parameters i.e. relapses, EDSS, age and DMT.~~

9  
10 768  
11  
12 769 ~~The present preliminary, small size, randomized, controlled phase II clinical trial provides~~  
13 ~~evidence for a novel nutritional/nutraceutical formula based on dietary, metabolic,~~  
14 770 ~~immunological, and neurobiological pathways possibly involved with disease progression in~~  
15 771 ~~MS. This novel intervention showed signs of efficacy in the observed annualised relapse rates~~  
16 772 ~~and disability progression to disability. -We took the appropriate all methodological~~  
17 773 ~~precautions measures in order to control for potential sources of bias and be to enable able to~~  
18 774 ~~reach a valid interpretation to be reached. We acknowledge that the presence of bias can only~~  
19 775 ~~be minimized, yet not excluded, in any clinical research setting and also that random error is~~  
20 776 ~~always a possible scenario in small trials. Thus, we present the observed results as an~~  
21 777 ~~additional piece of randomized evidence and anticipate the replication of our study findings~~  
22 778 ~~in a larger randomised controlled clinical trial.~~

23  
24 780  
25  
26 781 ~~The well known and established safety of the ingredients used and the protocol guidelines~~  
27 782 ~~were supportive reasons for us to proceed with the clinical study even though with limitation~~  
28 783 ~~on the pre-estimation of required trial sample size as it was discussed in method section. The~~  
29 784 ~~adherence of the subjects is Interferons and glatiramer acetate, the most widely used first line~~  
30 785 ~~MS drugs available today, are associated with the least severe side effects among MS~~  
31 786 ~~therapies but they are reported with only 29-33% ARR reduction and with no significant~~  
32 787 ~~effects on the progression of disability. Natalizumab as previously discussed and Fingolimod~~  
33 788 ~~with 54% ARR reduction (without significant benefit on the progression of disability) are~~  
34 789 ~~second line drugs associated with severe side effects.<sup>47,48</sup>~~

Formatted: No underline, Font color: Auto, English (U.S.)

1  
2  
3  
4  
5  
6  
7 790 ~~another issue but the duration of the study (42 months) is adding power to the results;<sup>44</sup>~~  
8  
9 791 ~~having the research questions been consciously and carefully approached and answered.~~  
10  
11 792 ~~Furthermore, the statistical methodologies used along with the appropriate adjustments,~~  
12  
13 793 ~~broadly accepted for MS clinical trials, power strengthen the findings, results, and~~  
14  
15 794 ~~significance. The baseline characteristics of the treatment arms could possibly be considered~~  
16  
17 795 ~~indicative of four very active groups of patients but that was the result of the limited number~~  
18  
19 796 ~~of RRMS population eligible for the study within Cyprus. On the other hand the balanced~~  
20  
21 797 ~~baseline characteristics without statistical differences, the statistical adjustments (for all~~  
22  
23 798 ~~important baseline parameters i.e. relapses, EDSS, age and DMT) and the randomization~~  
24  
25 799 ~~within four different groups are the safety valves against data misinterpretation. Yet, in small~~  
26  
27 800 ~~randomized control trials with a high drop out rate, the per protocol analysis could be~~  
28  
29 801 ~~affected by the characteristics of the patients dropping out. In order to safeguard our findings~~  
30  
31 802 ~~in the best possible way under the circumstances, we proceeded to adjusting for confounders.~~  
32  
33 803 ~~Moreover, we cannot discard our finding as a false positive, given that this is a randomized,~~  
34  
35 804 ~~double blind, placebo controlled clinical trial and, despite its small sample size, represents a~~  
36  
37 805 ~~piece of evidence that only a larger randomized controlled trial can replicate or refute. It is~~  
38  
39 806 ~~possible to question why DMTs efficacy cannot be emerged out of the data analysis, of the~~  
40  
41 807 ~~four treatment arms, and in accordance to their published values. We believe that the limited~~  
42  
43 808 ~~efficacy of the DMTs, the sample size and the statistical adjustments were strong limiting~~  
44  
45 809 ~~determining factors for such an indication to be countable. An additional argument is that the~~  
46  
47 810 ~~efficacy reported for the analysis of pre treatment (24 months before entry baseline) versus~~  
48  
49 811 ~~on trial ARR could be considered as potentially biased due to differences of how relapses~~  
50  
51 812 ~~were defined during the course of a study compared to pre treatment period; or due to~~  
52  
53 813 ~~regression to the mean or placebo effect. This analysis was performed as an additional~~  
54  
55 814 ~~exploratory analysis that we were able to do due to the availability of data. The relapses of~~

Formatted: No underline, Font color: Auto, English (U.S.)

Formatted: No underline, Font color: Auto, English (U.S.)

1  
2  
3  
4  
5  
6  
7 815 the two pre-treatment years were drawn out of the patients' archival records by the same  
8 816 treating neurologist involved in the study (MP), and according to the patients' hospitalization  
9 817 date for receiving intravenous methyl prednisolone. This analysis was not used as a primary  
10 818 or a secondary end-point under investigation although it is usually reported by many clinical  
11 819 studies. As a matter of fact many early phase trials are based only on such an analysis (before  
12 820 versus after treatment results). In almost all MS trials the number of relapses within the two  
13 821 years before baseline is a factor under adjustment for the statistical analyses.<sup>48</sup> The inclusion  
14 822 of the post hoc MRI analysis is another limiting factor that needs attention since it was used  
15 823 as an additional aside exploratory approach (due to study budget limitations it was not  
16 824 possible to be used as a formal endpoint); but the MRI evaluation was blinded and can be  
17 825 considered as representative of the randomized subjects within the treatment arms. As far as  
18 826 the regression to the mean and the placebo effect concerns we believe that the 6-month  
19 827 normalization period is an accountable and valuable eliminating factor of the possible effect;  
20 828 as well as the presence of four groups, where only the PLP10 treatment arm is associated  
21 829 with statistically significant efficacy versus placebo.

Formatted: English (U.S.)

22 830  
23 831 Our observations are consistent with the idea that simultaneous availability of specific PUFA  
24 832 along with other major membrane and myelin building blocks in combination with specific  
25 833 antioxidants, within optimum quantity, quality, ratio and structural form can possibly result to  
26 834 a more appropriate holistic therapy reducing MS disease activity. It is our belief that this is  
27 835 probably succeeded through synergistic and/or simultaneous effect on the interactions and  
28 836 dynamics of the most probable environmental and biological disease causing factors that  
29 837 induce complex biological network of events for disease pathogenesis and evolution; as well  
30 838 as on the protective and reparative mechanisms. We can additionally speculate that the nature  
31 839 of the intervention formula cannot be prohibitive for its use as preventive regimen and does

Formatted: No underline, Font color: Auto, English (U.S.)



1  
2  
3  
4  
5  
6  
7 840 not preclude probable positive efficacy on the other types of MS, but has to be further  
8 841 investigated. A larger size multicenter clinical trial will better establish PLP10 place in the  
9 842 armamentarium of treatments for MS.

Formatted: English (U.S.)

10 844 It is commonly accepted that nutrition is one of the possible environmental factors involved  
11 845 in the pathogenesis of MS, but its role as complementary MS treatment is unclear and largely  
12 846 disregarded.<sup>57</sup> It is well known that the majority of the patients suffering from MS they do  
13 847 use dietary supplements for a variable length of time and they prefer supplement type of  
14 848 "help" over conventional drugs.<sup>58</sup> Dietary antioxidants and fatty acids may influence the  
15 849 disease process in MS by reducing immune-mediated inflammation, oxidative stress and  
16 850 excitotoxic damage.<sup>11</sup> Present data reveal that healthy dietary molecules have a pleiotropic  
17 851 role and are able to change cell metabolism from anabolism to catabolism and down-regulate  
18 852 inflammation by interacting with enzymes, nuclear receptors and transcriptional factors.<sup>57</sup>  
19 853 The present preliminary small size randomized controlled phase II clinical trial, for the first  
20 854 time provides link evidence between dietary, metabolic, immunological, and neurobiological  
21 855 aspects of MS after three quarters of a century of unsuccessful scientific efforts. This link  
22 856 evidence might probably be the beginning of opening new horizons and new avenues in the  
23 857 approach of MS prevention and treatment, and possibly of other multifactorial chronic  
24 858 diseases, including neurodegenerative and autoimmune as well.

Formatted: No underline, Font color: Auto, English (U.S.)

Formatted: No underline, Font color: Auto, English (U.S.)

Formatted: English (U.S.)

1  
2  
3  
4  
5  
6  
7  
8  
9  
10  
11  
12  
13  
14  
15  
16  
17  
18  
19  
20  
21  
22  
23  
24  
25  
26  
27  
28  
29  
30  
31  
32  
33  
34  
35  
36  
37  
38  
39  
40  
41  
42  
43  
44  
45  
46  
47  
48  
49  
50  
51  
52  
53  
54  
55  
56  
57  
58  
59  
60

865  
866  
867  
868  
869  
870  
871  
872  
873  
874  
875

For peer

**1.**

| Treatment Arms                                                                                                                                                                                                                                                                                                                                                                                                                                                                                                                                                                           |                                                                                                                                                                                                                                                                                                                    |                                                                                                                                                            |                                                                      |
|------------------------------------------------------------------------------------------------------------------------------------------------------------------------------------------------------------------------------------------------------------------------------------------------------------------------------------------------------------------------------------------------------------------------------------------------------------------------------------------------------------------------------------------------------------------------------------------|--------------------------------------------------------------------------------------------------------------------------------------------------------------------------------------------------------------------------------------------------------------------------------------------------------------------|------------------------------------------------------------------------------------------------------------------------------------------------------------|----------------------------------------------------------------------|
| A†                                                                                                                                                                                                                                                                                                                                                                                                                                                                                                                                                                                       | B (PLP10)†                                                                                                                                                                                                                                                                                                         | C†                                                                                                                                                         | Placebo†                                                             |
| <b>Intervention:</b><br>EPA (1,650mg) / DHA<br>(4,650mg) / GLA<br>(2,000mg) / LA<br>(3,850mg) / total other<br>omega-3 (600mg)* / total<br>MUFA** (1,714mg) +<br>total SFA (18:0 160mg,<br>16:0 650mg) / vitamin A<br>(0.6mg) / vitamin E<br>(22mg) plus citrus aroma                                                                                                                                                                                                                                                                                                                    | <b>Intervention:</b><br>EPA (1,650mg) / DHA<br>(4,650mg) / GLA<br>(2,000mg) / LA<br>(3,850mg) / total other<br>omega-3 (600mg)* / total<br>MUFA** (1,714mg) +<br>total SFA (18:0 160mg,<br>16:0 650mg) / vitamin A<br>(0.6mg) / vitamin E<br>(22mg) +<br>pure $\gamma$ -tocopherol<br>(760mg) plus citrus<br>aroma | <b>Intervention:</b><br>pure $\gamma$ -tocopherol<br>(760mg) dispersed in<br>pure virgin olive oil<br>(16,137 mg) as delivery<br>vehicle plus citrus aroma | <b>Intervention:</b><br>Olive oil (pure virgin)<br>plus citrus aroma |
| * Other omega-3: C18:3n-3 37mg, C18:4n-3 73mg, C20:4n-3 98mg, C22:5n-3 392mg                                                                                                                                                                                                                                                                                                                                                                                                                                                                                                             |                                                                                                                                                                                                                                                                                                                    |                                                                                                                                                            |                                                                      |
| ** MUFA: 18:1 1300mg, 20:1 250mg, 22:1 82mg, 24:1 82mg                                                                                                                                                                                                                                                                                                                                                                                                                                                                                                                                   |                                                                                                                                                                                                                                                                                                                    |                                                                                                                                                            |                                                                      |
| † Total daily dose 19.5ml                                                                                                                                                                                                                                                                                                                                                                                                                                                                                                                                                                |                                                                                                                                                                                                                                                                                                                    |                                                                                                                                                            |                                                                      |
| EPAX1050, EPAX AS, Aalesund, Norway; was used as the source for the omega-3 PUFA, as re-esterified glycerides from fish body oils; Borage seed oil (organic, cold pressed) "Borago officinalis" Goerlich Pharma International GmbH, Edling, Germany, was used as the source for the omega-6 PUFA, MUFA and SFA, as triglycerides. The pure $\gamma$ -tocopherol was purchased from Tama Biochemical Co. Ltd., Shinjuku-ku Tokyo, Japan; vitamin A as beta-carotene from HealthAid Ltd., Middlesex, United Kingdom and the Citrus aroma from Givaudan Schwaiz AG, Dubendorf, Switzerland. |                                                                                                                                                                                                                                                                                                                    |                                                                                                                                                            |                                                                      |

**Table 1.** Intervention ingredients per treatment arm.

Formatted: English (U.S.)

| <b>2A.</b>                                 |                   |                    |                   |                   |              |
|--------------------------------------------|-------------------|--------------------|-------------------|-------------------|--------------|
| Characteristics                            | Group A<br>(n=20) | Group B†<br>(n=20) | Group C<br>(n=20) | Placebo<br>(n=20) | P-<br>value  |
| <b>Sex</b>                                 |                   |                    |                   |                   |              |
| Female - no. (%)                           | 15 (75)           | 15 (75)            | 15 (75)           | 15 (75)           | <b>1.000</b> |
| <b>Age (yr)</b>                            |                   |                    |                   |                   |              |
| Mean ± Standard Deviation (SD)             | <b>38.0±11.9</b>  | <b>36.9±8.4</b>    | <b>37.7±8.7</b>   | <b>38.1±10.9</b>  | <b>0.982</b> |
| Median (Range)                             | 38.0 (22 – 65)    | 37.0 (25 – 61)     | 36.5 (24 – 54)    | 36.0 (21–58)      |              |
| <b>Treatment history</b>                   |                   |                    |                   |                   |              |
| Patients on DMT- no. (%)                   | 11 (55)           | 9 (45)             | 12 (60)           | 10 (50)           | <b>0.875</b> |
| <b>Pre-treatment disease duration (yr)</b> |                   |                    |                   |                   |              |
| Mean ± SD                                  | <b>9.0±7.6</b>    | <b>8.6±4.8</b>     | <b>8.6±5.3</b>    | <b>7.7±5.7</b>    | <b>0.909</b> |
| Median (Range)                             | 7.5 (2 – 37)      | 8.0 (2 – 20)       | 8.0 (3 – 24)      | 6.5 (2 – 25)      |              |
| <b>Pre-treatment relapses‡</b>             |                   |                    |                   |                   |              |
| Mean ± SD                                  | <b>2.33±1.68</b>  | <b>2.41±1.73</b>   | <b>2.31±1.66</b>  | <b>2.10±1.32</b>  | <b>0.946</b> |
| Median (Range)                             | 2.0 (1 – 6)       | 2.0 (1 – 7)        | 2.0 (1 – 6)       | 2.0 (1 – 4)       |              |
| ARR                                        | <b>1.17</b>       | <b>1.21</b>        | <b>1.16</b>       | <b>1.05</b>       | <b>0.946</b> |
| Patients -% with ≤1 relapse                | 40                | 45                 | 40                | 35                |              |

| <b>Baseline EDSS score‡</b>                |                   |                    |                  |                   |              |
|--------------------------------------------|-------------------|--------------------|------------------|-------------------|--------------|
| Mean ± SD                                  | <b>2.52±1.23</b>  | <b>2.15±1.05</b>   | <b>2.42±1.21</b> | <b>2.39± 0.93</b> | <b>0.775</b> |
| Median (Range)                             | 2.5 (1.0–5.5)     | 2.0 (1.0–4.0)      | 2.5 (0.0–5.0)    | 2.5 (1.0–4.0)     |              |
| <b>2B.</b>                                 |                   |                    |                  |                   |              |
| Characteristics                            | Group A<br>(n=10) | Group B†<br>(n=10) | Group C<br>(n=9) | Placebo<br>(n=12) | P-<br>value  |
| <b>Sex</b>                                 |                   |                    |                  |                   |              |
| Female - no. (%)                           | 5 (50)            | 7 (70)             | 6 (66.6)         | 10 (83.3)         | <b>0.419</b> |
| <b>Age (yr)</b>                            |                   |                    |                  |                   |              |
| Mean ± SD                                  | <b>36.6±13.5</b>  | <b>34.80±5.4</b>   | <b>40.9±8.1</b>  | <b>39.8±13.2</b>  | <b>0.572</b> |
| Median (Range)                             | 34.5 (22–65)      | 34.5 (26–43)       | 40.0 (29–54)     | 37.5 (21–58)      |              |
| <b>Treatment history</b>                   |                   |                    |                  |                   |              |
| Patients on DMT- no. (%)                   | 6 (60)            | 4 (40)             | 6 (67)           | 6 (50)            | <b>0.949</b> |
| <b>Pre-treatment disease duration (yr)</b> |                   |                    |                  |                   |              |
| Mean ± SD                                  | <b>9.7±10.0</b>   | <b>8.3±5.3</b>     | <b>11.3±6.1</b>  | <b>8.7± 7.1</b>   | <b>0.807</b> |
| Median (Range)                             | 7.5 (2 – 37)      | 8.0 (2 – 20)       | 8.0 (4 – 24)     | 5.5 (2 – 25)      |              |
| <b>Pre-treatment relapses</b>              |                   |                    |                  |                   |              |
| Mean ± SD                                  | <b>2.20±1.47</b>  | <b>2.70±1.25</b>   | <b>1.78±0.66</b> | <b>1.67±1.37</b>  | <b>0.241</b> |
| Median (Range)                             | 2.0 (1 – 6)       | 2.5 (1 – 4)        | 2.0 (1 – 3)      | 1.5 (1 – 4)       |              |
| ARR                                        | <b>1.10</b>       | <b>1.35</b>        | <b>0.89</b>      | <b>0.83</b>       |              |
| Patients -% with ≤1 relapse                | 30                | 20                 | 33               | 50                |              |
| <b>Baseline EDSS score</b>                 |                   |                    |                  |                   |              |
| Mean ± SD                                  | <b>2.65±1.37</b>  | <b>2.40±1.12</b>   | <b>2.11±1.02</b> | <b>2.16±0.96</b>  | <b>0.698</b> |
| Median (Range)                             | 3.0 (1.0–5.5)     | 2.5 (1.0–4.0)      | 2.0 (1.0–4.0)    | 2.0 (1.0–3.5)     |              |

† PLP10 group

‡ Available data at Entry Baseline (n=18 for group A, n=17 for group B, n=19 for group C, n=19 for group D)

**Table 2.** The table section 2A reports the demographics and baseline disease characteristics for total randomized population by treatment arm.

The table section 2B reports the demographics and baseline disease characteristics of all-time on-study population by treatment arm. There were no significant between study-group differences at baseline for any characteristic.

887

Formatted: English (U.S.)

1  
2  
3  
4  
5  
6  
7 888  
8 889  
9  
10 890  
11  
12 891  
13  
14 892  
15 893  
16 894  
17 895  
18 896  
19 897  
20 898  
21 899  
22 900  
23  
24  
25  
26  
27  
28  
29  
30  
31  
32  
33  
34  
35  
36  
37  
38  
39  
40  
41  
42  
43  
44  
45  
46  
47  
48  
49  
50  
51  
52  
53  
54  
55  
56  
57  
58  
59  
60

For peer review only

| <b>3A.</b>                                                        |                   |              |                    |              |                  |              |                   |             |              |
|-------------------------------------------------------------------|-------------------|--------------|--------------------|--------------|------------------|--------------|-------------------|-------------|--------------|
| Characteristics                                                   | Group A<br>(N=10) |              | Group B†<br>(N=10) |              | Group C<br>(N=9) |              | Placebo<br>(N=12) |             |              |
| End Point                                                         | X                 | Y            | X                  | Y            | X                | Y            | X                 | Y           |              |
| Total No. of relapses                                             | 22                | 17           | 27                 | 8            | 16               | 13           | 20                | 25          |              |
| <b>Annual Relapse Rate (ARR)</b>                                  | <b>1.10</b>       | <b>0.85</b>  | <b>1.35</b>        | <b>0.40</b>  | <b>0.88</b>      | <b>0.72</b>  | <b>0.83</b>       | <b>1.04</b> |              |
| <b>% Reduction Compared to Placebo (primary endpoint) (Ys)¶</b>   |                   | <b>-18</b>   |                    | <b>-62</b>   |                  | <b>-30</b>   |                   |             | <b>N/A</b>   |
| <b>P Value against placebo</b>                                    |                   | <b>0.468</b> |                    | <b>0.024</b> |                  | <b>0.578</b> |                   |             |              |
| <b>ARR change -% (Y to X)¶</b>                                    |                   | <b>-23</b>   |                    | <b>-70</b>   |                  | <b>-18</b>   |                   |             | <b>+25</b>   |
| <b>P value against baseline</b>                                   |                   | <b>0.425</b> |                    | <b>0.003</b> |                  | <b>0.578</b> |                   |             | <b>0.500</b> |
| X: Total number of relapses of 24 months pre-treatment (baseline) |                   |              |                    |              |                  |              |                   |             |              |
| Y: Total number of relapses of 24 months on-treatment             |                   |              |                    |              |                  |              |                   |             |              |
| ¶ Unadjusted estimate                                             |                   |              |                    |              |                  |              |                   |             |              |
| <b>3B.</b>                                                        |                   |              |                    |              |                  |              |                   |             |              |
| <b><u>Excluding patients on natalizumab</u></b>                   | Group A<br>(N=9)  |              | Group B†<br>(N=10) |              | Group C<br>(N=9) |              | Placebo<br>(N=10) |             |              |

| End Point                                                       | X           | Y            | X           | Y            | X           | Y            | X           | Y            |
|-----------------------------------------------------------------|-------------|--------------|-------------|--------------|-------------|--------------|-------------|--------------|
| Total No. of relapses                                           | 16          | 15           | 27          | 8            | 16          | 13           | 13          | 19           |
| <b>Annual Relapse Rate (ARR)</b>                                | <b>0.88</b> | <b>0.83</b>  | <b>1.35</b> | <b>0.40</b>  | <b>0.88</b> | <b>0.72</b>  | <b>0.65</b> | <b>0.95</b>  |
| <b>% Reduction Compared to Placebo (primary endpoint) (Ys)¶</b> |             | -13          |             | -58          |             | -24          |             | N/A          |
| <b>P Value against placebo</b>                                  |             | <b>0.493</b> |             | <b>0.016</b> |             | <b>0.412</b> |             |              |
| <b>ARR change -% (Y to X)¶</b>                                  |             | <b>-6</b>    |             | <b>-70</b>   |             | <b>-18</b>   |             | <b>+46</b>   |
| <b>P value against baseline</b>                                 |             | <b>0.857</b> |             | <b>0.003</b> |             | <b>0.578</b> |             | <b>0.354</b> |

X: Total number of relapses of 24 months pre-treatment (baseline)  
 Y: Total number of relapses of 24 months on-treatment  
 † PLP10 group  
 ¶ Unadjusted estimate

**Table 3.** The table section 3A reports the two year primary end points of ARR of all-time on-study population by treatment arm and percent difference with placebo. During the 24mo period on-treatment the ARR of the group A was 0.85 with 18% decrease compared to placebo (p=0.468), of PLP10 group 0.40 with 62% decrease (p=0.024), and of group C 0.72 with 30% decrease (p=0.578) and reports the comparison of the 24mo pre-treatment ARR (baseline ARR) to 24mo on-treatment ARR of all-time on-study population including patients on natalizumab.

The table section 3B reports comparison of the 24mo pre-treatment ARR to 24mo on-treatment ARR of all-time on-study population excluding patients on natalizumab; and the comparison of the ARR during the 24mo period on-treatment (primary end point) between each one of the groups against placebo.

Formatted: English (U.S.)

1  
2  
3  
4  
5  
6  
7 907  
8 908  
9  
10 909  
11  
12 910  
13  
14 911  
15  
16 912  
17 913  
18  
19 914  
20  
21 915  
22  
23 916  
24 917  
25  
26 918  
27

| <b>4A.</b>                                                                                                      |                    |             |                     |             |                    |             |                    |             |
|-----------------------------------------------------------------------------------------------------------------|--------------------|-------------|---------------------|-------------|--------------------|-------------|--------------------|-------------|
| Characteristics                                                                                                 | Group A<br>(N =8)  |             | Group B†<br>(N =7)  |             | Group C<br>(N =10) |             | Placebo<br>(N =7)  |             |
|                                                                                                                 | X                  | Y           | X                   | Y           | X                  | Y           | X                  | Y           |
| No. of Relapses                                                                                                 | 20                 | 14          | 14                  | 14          | 27                 | 26          | 20                 | 13          |
| <b>Annual Relapse Rate (ARR)</b>                                                                                | <b>1.25</b>        | <b>0.88</b> | <b>1.00</b>         | <b>1.00</b> | <b>1.35</b>        | <b>1.30</b> | <b>1.42</b>        | <b>0.92</b> |
| X: Total number of relapses of 24 months pre-treatment<br>Y: Total number of relapses of 24 months on-treatment |                    |             |                     |             |                    |             |                    |             |
| <b>4B.</b>                                                                                                      |                    |             |                     |             |                    |             |                    |             |
| Characteristics                                                                                                 | Group A<br>(N =20) |             | Group B†<br>(N =20) |             | Group C<br>(N =20) |             | Placebo<br>(N =20) |             |
| End Point                                                                                                       | X                  | Y           | X                   | Y           | X                  | Y           | X                  | Y           |
| No. of Relapses                                                                                                 | 45                 | 34          | 49                  | 30          | 46                 | 41          | 43                 | 41          |
| <b>Annual Relapse Rate (ARR)</b>                                                                                | <b>1.13</b>        | <b>0.85</b> | <b>1.23</b>         | <b>0.75</b> | <b>1.15</b>        | <b>1.03</b> | <b>1.08</b>        | <b>1.03</b> |
| ARR Reduction -% (Y to X)¶                                                                                      | -25                |             | -39                 |             | -10                |             | -5                 |             |
| <b>P value against baseline</b>                                                                                 | <b>0.120</b>       |             | <b>0.005</b>        |             | <b>0.475</b>       |             | <b>0.652</b>       |             |
| <b>% Reduction of the ARR Compared to Placebo (Ys)¶</b>                                                         | -18                |             | -27                 |             | 0.0                |             | N/A                |             |
| <b>P Value against placebo</b>                                                                                  | <b>0.447</b>       |             | <b>0.121</b>        |             | <b>0.996</b>       |             |                    |             |

X: Total number of relapses of 24 months pre-treatment (baseline)  
 Y: Total number of relapses of 24 months on-treatment  
 ¶ Unadjusted estimate  
 † PLP10 group

**Table 4.** The table section 4A reports the two year primary end point of relapses based on study design as reported by drop-out patients by Treatment Arm. The most drop-out patients that went on disease modified therapy (DMT) were from the group A and placebo with three and two patients respectively on natalizumab. These parameters justify the decreased number of relapses recorded within group A and placebo drop-outs; and this could affect the ITT analysis in favor of placebo when the total two-year recorded data are used. For PLP10 group, 14 relapses were reported at baseline and remained the same during the two-year study. For placebo, 20 relapses were reported at baseline and decreased to 13 during the two-year study. This is expected since, for PLP10 group 43% of the drop-outs were under DMT at entry baseline and remained the same until the end of the study with no patient on natalizumab; but 57% of the placebo group drop-outs that were under DMT at entry baseline increased to 86% at the end of the study including two patients on natalizumab.

The table section 4B reports comparison of 24 months pre-treatment ARR (baseline) to 24 months on-treatment ARR of total randomized population, by treatment arm. The ARR of PLP10 group was 1.23 at baseline and 0.75 at the end of the study (39% reduction p=0.005), and for placebo 1.08 at baseline and 1.03 at the end of the study (5% reduction p=0.652). No statistical difference was calculated for the other two treatment arms. During the 24 months on-treatment, PLP10 group presented a 27% reduction of ARR versus placebo (p=0.121), with all groups without statistically significant results.

919

920

Formatted: English (U.S.)



1  
2  
3  
4  
5  
6  
7 921  
8  
9  
10 922  
11  
12  
13 923  
14  
15  
16 924  
17  
18  
19 925  
20  
21  
22 926  
23  
24  
25 927  
26  
27

| <b>5.</b>                                                                                                            |                   |                            |                  |                   |                                      |
|----------------------------------------------------------------------------------------------------------------------|-------------------|----------------------------|------------------|-------------------|--------------------------------------|
| Characteristics*                                                                                                     | Group A<br>(n=10) | Group B<br>PLP10<br>(n=10) | Group C<br>(n=9) | Placebo<br>(n=12) | P-value<br>Group<br>B vs.<br>Placebo |
| Annual relapse rate over 1 year**                                                                                    | <b>0.80</b>       | <b>0.40</b>                | <b>0.78</b>      | <b>0.83</b>       |                                      |
| Total number of relapses**                                                                                           | 8                 | 4                          | 7                | 10                |                                      |
| <b>Primary end points</b>                                                                                            |                   |                            |                  |                   |                                      |
| Annual relapse rate over 2 years (95% CI)**                                                                          | 0.85              | <b>0.40 (0.15-0.87)</b>    | 0.72             | <b>1.04</b>       | <b>0.024</b>                         |
| Total number of relapses**                                                                                           | 17                | 8                          | 13               | 25                |                                      |
| <b>Excluding patients on natalizumab</b>                                                                             |                   |                            |                  |                   |                                      |
|                                                                                                                      | <b>(n=9)</b>      | <b>(n=10)</b>              | <b>(n=9)</b>     | <b>(n=10)</b>     |                                      |
| Annual relapse rate over 2 years (95% CI)                                                                            | 0.83              | <b>0.40 (0.10-0.79)</b>    | 0.72             | <b>0.95</b>       | <b>0.016</b>                         |
| Total number of relapses                                                                                             | 15                | <b>8</b>                   | 13               | <b>19</b>         |                                      |
| <b>Secondary end points</b>                                                                                          |                   |                            |                  |                   |                                      |
| Cumulative probability of sustained progression increase by 1 point on EDSS confirmed after 6 mo, over 2 years -% ** | 43                | <b>10 (1/10)</b>           | 24               | <b>58 (7/12)</b>  | <b>0.019</b>                         |
| <b>Excluding patients on natalizumab</b>                                                                             |                   |                            |                  |                   |                                      |
| cumulative probability of sustained progression increase by 1 point on EDSS confirmed after 6 mo, over 2 years -%    | 33                | <b>10 (1/10)</b>           | 24               | <b>70 (7/10)</b>  | <b>0.006</b>                         |

| <b>Exploratory Results</b>                                            |            |                  |          |                    |              |
|-----------------------------------------------------------------------|------------|------------------|----------|--------------------|--------------|
| Patients proportion with $\leq 1$ relapse over 2 years -% **          | 50 (5/10)  | <b>90 (9/10)</b> | 56 (5/9) | <b>42 (5/12)</b>   | <b>0.030</b> |
| <b>MRI</b>                                                            |            |                  |          |                    |              |
| Patients proportion with new or enlarging T2 lesions-% **             | ----       | <b>29 (2/7)</b>  | ----     | <b>67 (4/6)</b>    |              |
| <b>Excluding patients on natalizumab</b>                              |            |                  |          |                    |              |
| Patients proportion with no new or enlarging T2 lesions-%             | ----       | <b>29 (2/7)</b>  | ----     | <b>80 (4/5)</b>    |              |
| <b>DMT (interferons, glatiramer acetate) and natalizumab</b>          |            |                  |          |                    |              |
| Patients proportion on DMT and natalizumab at the end of 2 years-% ** | 80 (8/10)† | <b>60 (6/10)</b> | 67 (6/9) | <b>75 (9/12) ‡</b> | <b>0.747</b> |
| * CI denotes confidence interval.                                     |            |                  |          |                    |              |
| ** Including patients on natalizumab                                  |            |                  |          |                    |              |
| † 1 out of 10 on natalizumab                                          |            |                  |          |                    |              |
| ‡ 2 out of 12 on natalizumab                                          |            |                  |          |                    |              |

**Table 5.** Clinical end points, according to study group for all-time on-study population.

Formatted: English (U.S.)

Acknowledgments: We thank all participant patients. We thank Thyrsos Posporis MD and the central reading centre (Ayios Therissos Medical Diagnostic Centre, Nicosia, Cyprus), and Eleni Eracleous, MD (neuroradiologist) for the contribution on the MRI scans and their team for the MRI reading. Special thanks to Elena Kkolou the pharmacist involved in the study and Eftychia Gaglia for her nursing contribution and collection of blood from the patients. We also thank Demetris Hadjisofoklis and Ioanna Leontiou (University of Nicosia, Helix Business incubator) for their contribution on randomization process, data collection, filing and blind codes keeping. Additionally we would like to thank the CING for hosting the project. Moreover, we thank the Cyprus Ministry of Commerce, Industry and Tourism for funding the project; and Yasoo Health Ltd., for providing some of the raw materials in exchange of investigating, on their behalf, the efficacy and safety of  $\gamma$ -tocopherol.

Formatted: No underline, Font color: Auto, English (U.S.)

Formatted: No underline, Font color: Auto, English (U.S.)

Contributors: All authors interpreted the data. I.S.P drafted the report and figures and all authors critically revised and approved the final version. M.C.P and I.S.P were responsible

Formatted: No underline, Font color: Auto, English (U.S.)

1  
2  
3  
4  
5  
6  
7 943 for the protocol and study design. M.C.P was the evaluator of patients' clinical progress signs  
8  
9 944 and the treatment physician. I.S.P and G.N.L were involved in the non-pharmacologic  
10  
11 945 treatment-related care. I.S.P performed the literature search and both I.S.P and G.N.L  
12  
13 946 contributed on the intervention formulation and composition rational. I.S.P supervised the  
14  
15 947 composition procedure of the interventions and the fatty acid profile analysis of the red blood  
16  
17 948 cell membranes. E.E.N and I.S.P performed the statistical analyses. E.E.N was an  
18  
19 949 independent scientist. All authors vouch for the accuracy and completeness of the data and  
20  
21 950 the statistical analyses.

Formatted: English (U.S.)

22 951  
23  
24 952 Funding: Supported by a grand from the Cyprus Ministry of Commerce, Industry and  
25  
26 953 Tourism, program for the creation of new high technology and innovation enterprises through  
27  
28 954 the business incubator.

Formatted: No underline, Font color: Auto, English (U.S.)

Formatted: English (U.S.)

Formatted: No underline, Font color: Auto, English (U.S.)

Formatted: English (U.S.)

29 955  
30  
31 956 Competing interest: M.C.P, G.N.L, I.S.P received grand support from the Cyprus Ministry of  
32  
33 957 Commerce, Industry and Tourism, Program for the Creation of New High Technology and  
34  
35 958 Innovation Enterprises through the Business Incubator. PALUPA Medical Ltd. is a research  
36  
37 959 company formed and registered for completion of the study, as required by the Governments'  
38  
39 960 funding grand program. M.C.P, G.N.L, I.S.P, and CING are all stockholders of the PALUPA  
40  
41 961 Medical Ltd. M.C.P is an employee at the CING. I.S.P is a senior research collaborator  
42  
43 962 hosted by the CING. G.N.L is a CING collaborator. E.E.N declares no-competing interest.  
44  
45 963 No pharmaceutical companies were involved in this phase II clinical trial. The intervention is  
46  
47 964 under a USA provisional patent; Application Number 61469081.

Formatted: No underline, Font color: Auto, English (U.S.)

Formatted: No underline, Font color: Auto, English (U.S.)

Formatted: English (U.S.)

48 965  
49  
50  
51 966 Ethical approval: Cyprus National bioethics committee (reference EEBK/EII/2005/10),  
52  
53 967

Formatted: No underline, Font color: Auto, English (U.S.)

Formatted: No underline, Font color: Auto, English (U.S.)

Formatted: No underline, Font color: Auto, English (U.S.)

Formatted: English (U.S.)

1  
2  
3  
4  
5  
6  
7 968 All authors have completed the Unified Competing Interest form at  
8  
9 969 [www.icmje.org/coi\\_disclosure.pdf](http://www.icmje.org/coi_disclosure.pdf) (available on request from the corresponding author) and  
10  
11 970 declare that (1) M.C.P, G.N.L, I.S.P have support from Cyprus Ministry of Commerce,  
12  
13 971 Industry and Tourism, Program for the Creation of New High Technology and Innovation  
14  
15 972 Enterprises through the Business Incubator for the submitted work; (2) E.E.N has no  
16  
17 973 relationships with Cyprus Ministry of Commerce, Industry and Tourism, or PLUPA Medical  
18  
19 974 Ltd. that might have an interest in the submitted work in the previous 3 years; (3) their  
20  
21 975 spouses, partners, or children have no financial relationships that may be relevant to the  
22  
23 976 submitted work; and (4) E.E.N has a non-financial interests that may be relevant to the  
24  
25 977 submitted work.

Formatted: No underline, Font color: Auto, English (U.S.)

Formatted: No underline, Font color: Auto, English (U.S.)

Formatted: English (U.S.)

26  
27 978  
28  
29 979 The Corresponding Author has the right to grant on behalf of all authors and does grant on  
30  
31 980 behalf of all authors, an exclusive license on a worldwide basis to the BMJ Publishing Group  
32  
33 981 Ltd and its Licensees to permit this article (if accepted) to be published in BMJ editions and  
34  
35 982 any other BMJPGL products and sublicenses to exploit all subsidiary rights, as set out in our  
36  
37 983 license (<http://resources.bmj.com/bmj/authors/checklists-forms/licence-for-publication>)."

Formatted: No underline, Font color: Auto, English (U.S.)

Formatted: English (U.S.)

## Article Summary

### Article focus:

- The increasing prevalence of Multiple Sclerosis (MS) combined with the limited efficacy and the side effects of the existing treatments urge the clinical need for the development of new, innovative, more effective, safe, and preventive treatment strategies.

- ~~For the first time w~~We propose three novel nutraceutical treatment interventions,~~original nutraceutical treatment intervention cocktails~~, formulated based on systems medicine rational through nutritional systems biology~~-rational~~; with PLP10 representing the complete composition of the formulation and the other two treatments represent partial formulations.
- We have studied the proposed interventions on 80 relapsing remitting MS patients (four groups of 20 each) for a total of 42 months (including the 12-month extended period), in a randomized, double-blind, placebo-controlled, phase II proof-of-concept clinical trial.

#### Key messages:

- In this small proof-of-concept randomized double-blind clinical trial, the PLP10 treatment statistically significantly reduced the ARR, and the risk of sustained disability progression without any reported serious adverse events.
- Overall, a total of 41 (51%) patients completed the 30-month trial. For the per-protocol analysis of ~~the two-year~~ primary end point, ~~8 relapses were recorded in the PLP10 group (n=10) (0.40 ARR) versus 25 relapses in the placebo group (n=12) (1.04 ARR), we observed~~ a 64% ~~adjusted~~ relative rate reduction for the PLP10 group (RRR 0.36, 95% CI 0.15 to 0.87, p=0.024). ~~In a subgroup analysis that excluded patients on monoclonal antibody (natalizumab) treatment, the observed adjusted RRR became stronger (72% over the two years (RRR 0.28, 95% CI 0.10 to 0.79, p=0.016). Per-protocol analysis for the secondary outcome at two years, time to disability progression, was significantly longer only with PLP10.~~ The cumulative probability of disability progression at two years was 10% in the PLP10 group and 58% in the placebo group (unadjusted log-rank p=0.019). ~~In a subgroup analysis that excluded patients on natalizumab the cumulative probability of progression was 10% for the 10 patients in the PLP10 group and 70% for~~

**Formatted:** No underline, Font color: Auto, Not Highlight

**Formatted:** Not Highlight

the 12 patients in the placebo group, a relative 86% decrease in the risk of sustained progression of disability in the PLP10 group (unadjusted log-rank  $p=0.006$ ; adjusted hazard ratio, 0.11; 95% CI 0.01 to 0.97,  $p=0.047$ ).

PLP10's ingredients formulation (specific PUFA, MUFA, SFA, gamma-tocopherol, vitamin E and vitamin A), has probably the ability to interfere with the repertoire of mechanisms involved in MS pathogenesis as well as with the recovery mechanisms, neuroprotection and remyelination.

This proof of concept clinical study might be indicative of new treatment approach (holistic) of chronic complex multifactorial diseases and especially of MS prevention and treatment and of a new epoch of novel drug development.

**Strengths and limitations of this study:**

- The randomisation, blinding, the use of placebo, the definite inclusion/exclusion criteria and primary/secondary end points, along with the 30 month duration of the study, as well as the inclusion of a 6-month normalisation (chronotherapy) period allow for an appropriate overview of the safety and efficacy of the assessed interventions.
- The small sample size and the high rate of drop-outs (due to the palatability of the formula) are the limitations associated with the present study.

**Formatted:** No underline, English (U.K.), Not Highlight

**Formatted:** No underline, Not Highlight

**Formatted:** Indent: Left: 0.06", Hanging: 0.19", Space After: 0 pt

**Formatted:** English (U.S.), Not Highlight

**Formatted:** No underline, Not Highlight

**Formatted:** Space After: 0 pt, Pattern: Clear (Text 2)

**Formatted:** Font: No underline, English (U.K.), Not Highlight

**Formatted:** Font: English (U.K.), Not Highlight

**Formatted:** Font: English (U.K.)

**Formatted:** List Paragraph, Indent: Left: 0.06", Hanging: 0.19", Space After: 0 pt, Bulleted + Level: 1 + Aligned at: 0.25" + Indent at: 0.5", Pattern: Clear (Text 2)

**Formatted:** Font: No underline, English (U.K.)

**Formatted:** Indent: Left: 0.25", Space After: 0 pt, No bullets or numbering

**Formatted:** Font: (Default) Times New Roman, 12 pt, No underline, Font color: Auto

**Formatted:** Indent: Left: 0.06", Hanging: 0.19", Space After: 0 pt, Bulleted + Level: 1 + Aligned at: 0.5" + Indent at: 0.75"

**Formatted:** Font: (Default) Times New Roman, 12 pt, No underline, Font color: Auto

**Formatted:** Font: (Default) Times New Roman, 12 pt, No underline

**Formatted:** Font: (Default) Times New Roman, 12 pt, No underline, Font color: Auto

**Formatted:** Font: (Default) Times New Roman, 12 pt

**Formatted:** Font: (Default) Times New Roman, 12 pt, No underline, Font color: Auto

**Formatted:** Font: English (U.K.)

**Formatted:** Font: (Default) +Body (Calibri), 11 pt, English (U.K.)

**Formatted:** List Paragraph, Left, Space After: 0 pt, Line spacing: single

## References

1. Baranzini SE, Oksenberg JR, Hauser SL. New insights into the genetics of multiple sclerosis. *Journal of Rehabilitation Research and Development* 2002;39:201-210.
2. Goni J, Esteban FJ, de Mendizabal NV, et al. A computational analysis of protein-protein interaction networks in neurodegenerative diseases. *BMC Syst Biol* 2008;2:52.
3. Lobo I. Multifactorial inheritance and genetic disease. *Nature Education* 2008; 1.
4. Compston A, Coles A. Multiple sclerosis. *Lancet* 2002;359:1221.
5. Evans PH. Free radicals in brain metabolism and pathology. *British Medical Bulletin* 1993;49:577-587.
6. Knight J. Reactive oxygen species and the neurodegenerative disorders. *Ann Clin Lab Sci* 1997;27:11-25.
7. Matute C, Alberdi E, Domercq M, Pérez-Cerdá F, Pérez-Samartín A, Sánchez-Gómez MV. The link between excitotoxic oligodendroglial death and demyelinating diseases. *Trends in Neurosciences* 2001;24:224-230.

**Formatted:** No underline, Font color: Auto, English (U.S.)

**Formatted:** English (U.S.)

**Formatted:** No underline, Font color: Auto, English (U.S.)

**Formatted:** English (U.S.)

**Formatted:** No underline, Font color: Auto, English (U.S.)

**Formatted:** English (U.S.)

**Formatted:** No underline, Font color: Auto, English (U.S.)

**Formatted:** English (U.S.)

**Formatted:** No underline, Font color: Auto, English (U.S.)

**Formatted:** English (U.S.)

**Formatted:** No underline, Font color: Auto, English (U.S.)

**Formatted:** English (U.S.)

**Formatted:** No underline, Font color: Auto, English (U.S.)

**Formatted:** English (U.S.)

- 1  
2  
3  
4  
5  
6  
7 1009 8. Owens T. The enigma of multiple sclerosis: inflammation and neurodegeneration  
8  
9 1010 cause heterogeneous dysfunction and damage. *Current Opinion in Neurology*  
10 1011 2003;16:259-265. **Formatted:** No underline, Font color: Auto,  
11 English (U.S.)
- 12 1012 9. Smith KJ, Kapoor R, Felts PA. Demyelination: The role of reactive oxygen and  
13  
14 1013 nitrogen species. *Brain Pathology* 1999;9:69-92. **Formatted:** English (U.S.)
- 15 1014 10. Ahn AC, Tewari M, Poon C-S, Phillips RS. The Clinical Applications of a Systems  
16  
17 1015 Approach. *PLoS Med* 2006;3:e209. **Formatted:** No underline, Font color: Auto,  
18 English (U.S.)
- 19 1016 11. van Meeteren ME, Teunissen CE, Dijkstra CD, van Tol EAF. Antioxidants and  
20  
21 1017 polyunsaturated fatty acids in multiple sclerosis. *Eur J Clin Nutr* 2005;59:1347-1361. **Formatted:** English (U.S.)
- 22 1018 12. Calder PC. n-3 Polyunsaturated fatty acids, inflammation, and inflammatory diseases.  
23  
24 1019 The *American Journal of Clinical Nutrition* 2006;83:S1505-1519S. **Formatted:** No underline, Font color: Auto,  
25 English (U.S.)
- 26 1020 13. Piani D, Fontana A. Involvement of the cystine transport system xc- in the  
27  
28 1021 macrophage- induced glutamate-dependent cytotoxicity to neurons. *The Journal of*  
29  
30 1022 *Immunology* 1994;152:3578-3585. **Formatted:** English (U.S.)
- 31 1023 14. Youdim KA, Martin A, Joseph JA. Essential fatty acids and the brain: possible health  
32  
33 1024 implications. *International Journal of Developmental Neuroscience* 2000;18:383-399. **Formatted:** No underline, Font color: Auto,  
34 English (U.S.)
- 35 1025 15. Calder PC. Dietary modification of inflammation with lipids. *Proceedings of the*  
36  
37 1026 *Nutrition Society* 2002;61:345-358. **Formatted:** English (U.S.)
- 38 1027 16. Gil Á. Polyunsaturated fatty acids and inflammatory diseases. *Biomedicine &*  
39  
40 1028 *Pharmacotherapy* 2002;56:388-396. **Formatted:** No underline, Font color: Auto,  
41 English (U.S.)
- 42 1029 17. Ariel A, Serhan CN. Resolvins and protectins in the termination program of acute  
43  
44 1030 inflammation. *Trends in Immunology* 2007;28:176-183. **Formatted:** English (U.S.)
- 45 1031 18. Arita M, Ohira T, Sun Y-P, Elangovan S, Chiang N, Serhan CN. Resolvin E1  
46  
47 1032 selectively interacts with leukotriene B4 receptor BLT1 and chemR23 to regulate  
48  
49 1033 inflammation. *The Journal of Immunology* 2007;178:3912-3917. **Formatted:** No underline, Font color: Auto,  
50 English (U.S.)
- 51  
52  
53  
54  
55  
56  
57  
58  
59  
60



1  
2  
3  
4  
5  
6  
7  
8  
9  
10  
11  
12  
13  
14  
15  
16  
17  
18  
19  
20  
21  
22  
23  
24  
25  
26  
27  
28  
29  
30  
31  
32  
33  
34  
35  
36  
37  
38  
39  
40  
41  
42  
43  
44  
45  
46  
47  
48  
49  
50  
51  
52  
53  
54  
55  
56  
57  
58  
59  
60

- 1034 19. Janakiram NB, Rao CV. Role of Lipoxins and Resolvins as Anti-Inflammatory and  
1035 Proresolving Mediators in Colon Cancer. *Current Molecular Medicine* 2009;9:565-  
1036 579.
- 1037 20. Serhan C, Arita M, Hong S, Gotlinger K. Resolvins, docosatrienes, and  
1038 neuroprotectins, novel omega-3-derived mediators, and their endogenous aspirin-  
1039 triggered epimers. *Lipids* 2004;39:1125-1132.
- 1040 21. Serhan CN, Chiang N, Van Dyke TE. Resolving inflammation: dual anti-  
1041 inflammatory and pro-resolution lipid mediators. *Nat Rev Immunol* 2008;8:349-361.
- 1042 22. Rossetti RG, Seiler C, DeLuca P, Laposata M, Zurier R. Oral administration of  
1043 unsaturated fatty acids: effects on human peripheral blood T lymphocyte proliferation.  
1044 *Journal of Leukocyte Biology* 1997;62:438-443.
- 1045 23. Vatassery G. Vitamin E and other endogenous antioxidants in the central nervous  
1046 system. *Geriatrics* 1998a;53:S25-S27.
- 1047 24. Fukuzawa K, Gebicki JM. Oxidation of [alpha]-tocopherol in micelles and liposomes  
1048 by the hydroxyl, perhydroxyl, and superoxide free radicals. *Archives of Biochemistry*  
1049 *and Biophysics* 1983;226:242-251.
- 1050 25. Christen S, Woodall AA, Shigenaga MK, Southwell-Keely PT, Duncan MW, Ames  
1051 BN.  $\gamma$ -Tocopherol traps mutagenic electrophiles such as NOx and complements  $\alpha$ -  
1052 tocopherol: Physiological implications. *Proceedings of the National Academy of*  
1053 *Sciences of the United States of America* 1997;94:3217-3222.
- 1054 26. Brigelius-Flohé R, Kelly FJ, Salonen JT, Neuzil J, Zingg J-M, Azzi A. The European  
1055 perspective on vitamin E: current knowledge and future research. *The American*  
1056 *Journal of Clinical Nutrition* 2002;76:703-716.
- 1057 27. Calder P. Polyunsaturated fatty acids, inflammatory processes and inflammatory  
1058 bowel diseases *Mol Nutr Food Res* 2008;52:885-897.

Formatted: No underline, Font color: Auto, English (U.S.)

Formatted: English (U.S.)

Formatted: No underline, Font color: Auto, English (U.S.)

Formatted: English (U.S.)

Formatted: No underline, Font color: Auto, English (U.S.)

Formatted: English (U.S.)

Formatted: No underline, Font color: Auto, English (U.S.)

Formatted: English (U.S.)

Formatted: No underline, Font color: Auto, English (U.S.)

Formatted: English (U.S.)

Formatted: No underline, Font color: Auto, English (U.S.)

Formatted: English (U.S.)

Formatted: No underline, Font color: Auto, English (U.S.)

Formatted: No underline, Font color: Auto, English (U.S.)

Formatted: No underline, Font color: Auto, English (U.S.)

Formatted: English (U.S.)

Formatted: No underline, Font color: Auto, English (U.S.)

Formatted: English (U.S.)

Formatted: No underline, Font color: Auto, English (U.S.)

Formatted: English (U.S.)

- 1  
2  
3  
4  
5  
6  
7 1059 28. Edwards IJ, O'Flaherty JT. Omega-3 Fatty Acids and PPAR $\gamma$  in Cancer. PPAR  
8 Research 2008;2008:1-15. **Formatted:** No underline, Font color: Auto,  
9 1060 English (U.S.) **Formatted:** No underline, Font color: Auto,  
10 1061 29. Groeger AL, Cipollina C, Cole MP, et al. Cyclooxygenase-2 generates anti-  
11 inflammatory mediators from omega-3 fatty acids. Nat Chem Biol 2010;6:433-441. **Formatted:** English (U.S.)  
12 1062 **Formatted:** No underline, Font color: Auto,  
13 1063 30. Dyall SC, Michael GJ, Michael-Titus AT. Omega-3 fatty acids reverse age-related  
14 decreases in nuclear receptors and increase neurogenesis in old rats. Journal of  
15 Neuroscience Research 2010;88:2091-2102. **Formatted:** English (U.S.)  
16 1064 **Formatted:** No underline, Font color: Auto,  
17 1065 31. McNamara RK. DHA Deficiency and Prefrontal Cortex Neuropathology in Recurrent  
18 Affective Disorders. The Journal of Nutrition 2010;140:864-868. **Formatted:** English (U.S.)  
19 1066 **Formatted:** No underline, Font color: Auto,  
20 1067 32. Salvati S, Natali F, Attorri L, et al. Eicosapentaenoic acid stimulates the expression of  
21 myelin proteins in rat brain. Journal of Neuroscience Research 2008;86:776-784. **Formatted:** English (U.S.)  
22 1068 **Formatted:** No underline, Font color: Auto,  
23 1069 33. Abraham M, Shapiro S, Karni A, Weiner HL, Miller A. Gelatinases (MMP-2 and  
24 MMP-9) are preferentially expressed by Th1 vs. Th2 cells. Journal of  
25 Neuroimmunology 2005;163:157-164. **Formatted:** English (U.S.)  
26 1070 **Formatted:** No underline, Font color: Auto,  
27 1071 34. C ffrrench-Constant. Pathogenesis of multiple sclerosis. The Lancet 1994;343:271-  
28 275. **Formatted:** English (U.S.)  
29 1072 **Formatted:** No underline, Font color: Auto,  
30 1073 35. Leppert D, Lindberg RLP, Kappos L, Leib SL. Matrix metalloproteinases:  
31 multifunctional effectors of inflammation in multiple sclerosis and bacterial  
32 meningitis. Brain Research Reviews 2001;36:249-257. **Formatted:** English (U.S.)  
33 1074 **Formatted:** No underline, Font color: Auto,  
34 1075 36. Curtis CL, Rees SG, Cramp J, et al. Effects of n-3 fatty acids on cartilage metabolism.  
35 Proceedings of the Nutrition Society 2002;61:381-389. **Formatted:** English (U.S.)  
36 1076 **Formatted:** No underline, Font color: Auto,  
37 1077 37. Harris MA, Hansen RA, Vidsudhiphan P, et al. Effects of conjugated linoleic acids  
38 and docosahexaenoic acid on rat liver and reproductive tissue fatty acids,  
39 prostaglandins and matrix metalloproteinase production. Prostaglandins, Leukotrienes  
40 and Essential Fatty Acids 2001;65:23-29. **Formatted:** English (U.S.)  
41 1078 **Formatted:** No underline, Font color: Auto,  
42 1079 **Formatted:** English (U.S.)  
43 1080 **Formatted:** No underline, Font color: Auto,  
44 1081 **Formatted:** English (U.S.)  
45 1082 **Formatted:** No underline, Font color: Auto,  
46 1083 **Formatted:** English (U.S.)  
47  
48  
49  
50  
51  
52  
53  
54  
55  
56  
57  
58  
59  
60

- 1  
2  
3  
4  
5  
6  
7 1084 38. McCabe A, Wallace J, Gilmore W, Strain J, McGlynn H. The effect of  
8 1085 eicosapentanoic acid on matrix metalloproteinase gene expression. *Lipids*  
9 1086 1999;34:S217-S218. **Formatted:** No underline, Font color: Auto,  
English (U.S.)
- 10 1086  
11 1086  
12 1087 39. Shinto L, Marracci G, Bumgarner L, Yadav V. The Effects of Omega-3 Fatty Acids  
13 1088 on Matrix Metalloproteinase-9 Production and Cell Migration in Human Immune  
14 1088 Cells: Implications for Multiple Sclerosis. *Autoimmune Diseases* 2011;2011. **Formatted:** English (U.S.)
- 15 1089  
16 1089  
17 1089  
18 1090 40. Auffray C, Chen Z, Hood L. Systems medicine: the future of medical genomics and  
19 1091 healthcare. *Genome Med* 2009;1:2. **Formatted:** No underline, Font color: Auto,  
English (U.S.)
- 20 1091  
21 1091  
22 1092 41. Huang WL, King VR, Curran OE, et al. A combination of intravenous and dietary  
23 1093 docosahexaenoic acid significantly improves outcome after spinal cord injury. *Brain*  
24 1093 2007;130:3004-3019. **Formatted:** English (U.S.)
- 25 1094  
26 1094  
27 1094  
28 1095 42. Marangoni F, Angeli MT, Colli S, et al. Changes of n – 3 and n – 6 fatty acids in  
29 1096 plasma and circulating cells of normal subjects, after prolonged administration of 20:5  
30 1096 (EPA) and 22:6 (DHA) ethyl esters and prolonged washout. *Biochimica et Biophysica*  
31 1097 *Acta (BBA) - Lipids and Lipid Metabolism* 1993;1210:55-62. **Formatted:** No underline, Font color: Auto,  
English (U.S.)
- 32 1097  
33 1098  
34 1098  
35 1099 43. Martínez M, Vázquez E, García-Silva MT, et al. Therapeutic effects of  
36 1100 docosahexaenoic acid ethyl ester in patients with generalized peroxisomal disorders I.  
37 1100 *The American Journal of Clinical Nutrition* 2000;71:376S-385S. **Formatted:** English (U.S.)
- 38 1101  
39 1101  
40 1102 44. Committee for medicinal products for human use. Guideline on clinical trials in small  
41 1102 populations In: European Medicines Agency, 2006: 1-10. **Formatted:** No underline, Font color: Auto,  
English (U.S.)
- 42 1103  
43 1103  
44 1103  
45 1104 45. Gerard E Dallal. The Little Handbook of Statistical Practice. [online]. Available at  
46 1104 URL|. Accessed Date Accessed, Year|. **Formatted:** English (U.S.)
- 47 1105  
48 1105  
49 1106 46. Wang YC, Meyerson L, Tang YQ, Qian N. Statistical methods for the analysis of  
50 1106 relapse data in MS clinical trials. *Journal of the Neurological Sciences* 2009;285:206-  
51 1107 211. **Formatted:** No underline, Font color: Auto,  
English (U.S.)
- 52 1107  
53 1108  
54 1108  
55  
56  
57  
58  
59  
60

- 1  
2  
3  
4  
5  
6  
7 1109 47. Polman CH, O'Connor PW, Havrdova E, et al. A randomized, placebo-controlled trial  
8 of natalizumab for relapsing multiple sclerosis. The New England Journal of  
9 1110  
10 1111 Medicine 2006;354:899-910. **Formatted:** No underline, Font color: Auto,  
11 English (U.S.)
- 12 1112 48. Kappos L, Radue E-W, O'Connor P, et al. A Placebo-Controlled Trial of Oral  
13 Fingolimod in Relapsing Multiple Sclerosis. New England Journal of Medicine  
14 1113  
15 1114 2010;362:387-401. **Formatted:** English (U.S.)
- 16 1115 49. Cunnane S, Ho S, Dore-Duffy P, Ells K, Horrobin D. Essential fatty acid and lipid  
17 profiles in plasma and erythrocytes in patients with multiple sclerosis. The American  
18 1116  
19 1117 Journal of Clinical Nutrition 1989;50:801-806. **Formatted:** No underline, Font color: Auto,  
20 English (U.S.)
- 21 1118 50. Harbige LS, Sharief MK. Polyunsaturated fatty acids in the pathogenesis and  
22 treatment of multiple sclerosis. British Journal of Nutrition 2007;98:S46-S53. **Formatted:** English (U.S.)
- 23 1119  
24 1120 51. Wilson R, Tocher D. Lipid and fatty acid composition is altered in plaque tissue from  
25 multiple sclerosis brain compared with normal brain white matter. Lipids 1991;26:9-  
26 1121  
27 1122 15. **Formatted:** No underline, Font color: Auto,  
28 English (U.S.)
- 29 1123 52. Rafat AS, Saame RS, Laura AS, Heidi RY, William S, Gary PZ. Omega 3-Fatty  
30 Acids: Health Benefits and Cellular Mechanisms of Action. Mini Reviews in  
31 1124  
32 1125 Medicinal Chemistry 2004;4:859-871. **Formatted:** English (U.S.)
- 33 1126 53. Shaikh SR, Edidin M. Polyunsaturated fatty acids, membrane organization, T cells,  
34 and antigen presentation. The American Journal of Clinical Nutrition 2006;84:1277-  
35 1127  
36 1128 1289. **Formatted:** No underline, Font color: Auto,  
37 English (U.S.)
- 38 1129 54. Lajtha A, Toth J, Fujimoto K, Agrawal CH. Turnover of Myelin Proteins in Mouse  
39 Brain in vivo. Biochem J 1977;164:323-329. **Formatted:** English (U.S.)
- 40 1130  
41 1131 55. LeBaron FN, Sanyal S, Jungalwala FB. Turnover rate of molecular species of  
42 sphingomyelin in rat brain. Neurochemical Research 1981;6:1081-1089. **Formatted:** No underline, Font color: Auto,  
43 English (U.S.)
- 44 1132  
45  
46  
47  
48  
49  
50  
51  
52  
53  
54  
55  
56  
57  
58  
59  
60

- 1  
2  
3  
4  
5  
6  
7 1133 56. Yao JK. Increased polyunsaturated fatty acids in developing and regenerating  
8 1134 peripheral nerve. *Biochimica et Biophysica Acta (BBA) - Lipids and Lipid*  
9 1135 *Metabolism* 1982;712:542-546.  
10  
11 1136 57. Riccio P. The molecular basis of nutritional intervention in multiple sclerosis: a  
12 1137 narrative review. *Complement Ther Med* 2011;19:228-237.  
13  
14 1138 58. Farinotti M, Simi S, Di Pietrantonj C, McDowell N, et al. Dietary interventions for  
15 1139 multiple sclerosis (Review), the Cochrane Library 2007, issue I.

Formatted: No underline, Font color: Auto, English (U.S.)

Formatted: English (U.S.)

Formatted: No underline, Font color: Auto, English (U.S.)

Formatted: English (U.S.)

Formatted: No underline, Font color: Auto, English (U.S.)

## Figure legends

Formatted: English (U.S.)

### Figure 1. Study Flowchart

Figure 2. Omega-6 and omega-3 PUFA, their respective metabolic derivatives and their possible effects on inflammation.

Formatted: No underline, Font color: Auto, English (U.S.)

Formatted: English (U.S.)

Formatted: No underline, Font color: Auto, English (U.S.)

Formatted: English (U.S.)

After consumption, the PUFAs are metabolized via several pathways (not shown) to active compounds that mediate inflammation and products that promote resolution of inflammation.

Formatted: No underline, Font color: Auto, English (U.S.)

Formatted: No underline, Font color: Auto, English (U.S.)

Formatted: No underline, Font color: Auto, English (U.S.)

Abbreviations: PL, phospholipid; IFN- $\gamma$ , interferon  $\gamma$ ; IL-2, interleukin 2; NF $\kappa$ B, nuclear factor kappa B; PGE2, prostaglandin E2; PPAR $\gamma$ , peroxisome proliferator-activated receptor  $\gamma$ ; PUFAs, polyunsaturated fatty acids; TGF $\beta$ , transforming growth factor  $\beta$ ; TNF, tumor necrosis factor; COX, cyclooxygenase; hydroxyeicosatetraenoic acid; HPETE, hydroperoxyeicosatetraenoic acid; LOX, lipoxygenase; LT, leukotriene; PG, prostaglandin; TX, thromboxane; RXR- $\gamma$ , retinoid X receptor-gamma; Nrf2, nuclear respiratory factor; MMP, metalloproteinase.

Formatted: No underline, Font color: Auto, English (U.S.)

Formatted: Font: 11 pt, No underline, Font color: Auto, English (U.S.)

Formatted: No underline, Font color: Auto, English (U.S.)

Formatted: No underline, Font color: Auto, English (U.S.)

Formatted: English (U.S.)

Figure 3. Panel A demonstrates the ARR of all-time on-study patients during the 24mo pre-treatment (baseline ARR) and at different on-study intervals (6, 12, 18, 24 mo) per treatment arm. \*\*

Formatted: No underline, Font color: Auto, English (U.S.)

Formatted: No underline, Font color: Auto, English (U.S.)

Formatted: No underline, Font color: Auto, English (U.S.)

Formatted: English (U.S.)

1  
2  
3  
4  
5  
6  
7 1156 Panel B demonstrates the ARR of all-time on-study population between 0-6, 6-12, 6-18, and  
8 1157 6-24 mo period intervals, of PLP10 vs. placebo group. \*\*

Formatted: No underline, Font color: Auto, English (U.S.)

9  
10  
11 1158 Panel C demonstrates the ARR of all-time on-study population of PLP10 vs. placebo group at  
12 1159 baseline, during 1<sup>st</sup> year, and during the 2-year on-treatment. \*\*

Formatted: No underline, Font color: Auto, English (U.S.)

Formatted: No underline, Font color: Auto, English (U.S.)

Formatted: English (U.S.)

Formatted: No underline, Font color: Auto, English (U.S.)

13  
14  
15  
16 1160 Panel D demonstrates the dispersion of relapses throughout the 2-year period of all-time on-  
17 1161 study (excluding patients on natalizumab) of PLP10 (n=10) vs. placebo (n=10). Placebo  
18 1162 shows an irregular dispersion of relapses in relation to PLP10 group with linear increasing  
19 1163 trend while PLP10 shows a stabilized linear trend. By using the per-protocol model where  
20 1164 patients on natalizumab were excluded, we could compare the number of relapses on a same  
21 1165 number of patients.

Formatted: No underline, Font color: Auto, English (U.S.)

Formatted: No underline, Font color: Auto, English (U.S.)

Formatted: English (U.S.)

22  
23  
24  
25  
26  
27  
28 1166 \*\* Including the patients on natalizumab.

Formatted: No underline, Font color: Auto, English (U.S.)

Formatted: English (U.S.)

29  
30  
31 1167 **Figure 4.** Panel 4A demonstrates the Kaplan–Meier plot of the time to sustained progression  
32 1168 of disability among all-time on-study patients, excluding patients on natalizumab, receiving  
33 1169 intervention A, PLP10 and C as compared with placebo. PLP10 reduced the risk of sustained  
34 1170 progression of disability by 86% over two years (p=0.006). Intervention formula A reduced  
35 1171 the risk of sustained progression of disability by 53% (p=0.266) and intervention formula C  
36 1172 by 67% (p=0.061).

Formatted: No underline, Font color: Auto, English (U.S.)

Formatted: English (U.S.)

Formatted: English (U.S.)

37  
38  
39  
40  
41  
42  
43 1173 Panel 4B demonstrates the Kaplan–Meier plot of the time to sustained progression of  
44 1174 disability among ITT population receiving intervention A, PLP10 and C as compared with  
45 1175 placebo. PLP10 reduced the risk of sustained progression of disability by 71% over two years  
46 1176 (p=0.052, trend). Intervention formula A reduced the risk of sustained progression of  
47 1177 disability by 22% (p=0.727) and intervention formula C by 40% (p=0.447).

Formatted: No underline, Font color: Auto, English (U.S.)

Formatted: English (U.S.)

1  
2  
3  
4  
5  
6  
7  
8  
9  
10  
11  
12  
13  
14  
15  
16  
17  
18  
19  
20  
21  
22  
23  
24  
25  
26  
27  
28  
29  
30  
31  
32  
33  
34  
35  
36  
37  
38  
39  
40  
41  
42  
43  
44  
45  
46  
47  
48  
49  
50  
51  
52  
53  
54  
55  
56  
57  
58  
59  
60

1178 **Figure 5.** Mean change in expanded disability status scale score as a function of visit

1179 number. Values are expressed as mean  $\pm$  standard error of the mean (s.e.m.)

1180 Including patients on natalizumab

1181 Excluding patients on natalizumab

1182

- Formatted:** No underline, Font color: Auto, English (U.S.)
- Formatted:** No underline, Font color: Auto, English (U.S.)
- Formatted:** No underline, Font color: Auto, English (U.S.)
- Formatted:** No underline, Font color: Auto, English (U.S.)
- Formatted:** English (U.S.)
- Formatted:** No underline, Font color: Auto, English (U.S.)
- Formatted:** English (U.S.)
- Formatted:** No underline, Font color: Auto, English (U.S.)
- Formatted:** English (U.S.)

For peer review only

1  
2  
3  
4  
5  
6  
7  
8  
9  
10  
11  
12  
13  
14  
15  
16  
17  
18  
19  
20  
21  
22  
23  
24  
25  
26  
27  
28  
29  
30  
31  
32  
33  
34  
35  
36  
37  
38  
39  
40  
41  
42  
43  
44  
45  
46  
47  
48  
49  
50  
51  
52  
53  
54  
55  
56  
57  
58  
59  
60

2/19/2013 4:21:00 PM

2/19/2013 4:21:00 PM

For peer review only





**Omega-6 and omega-3 PUFA Consumption through Diet**

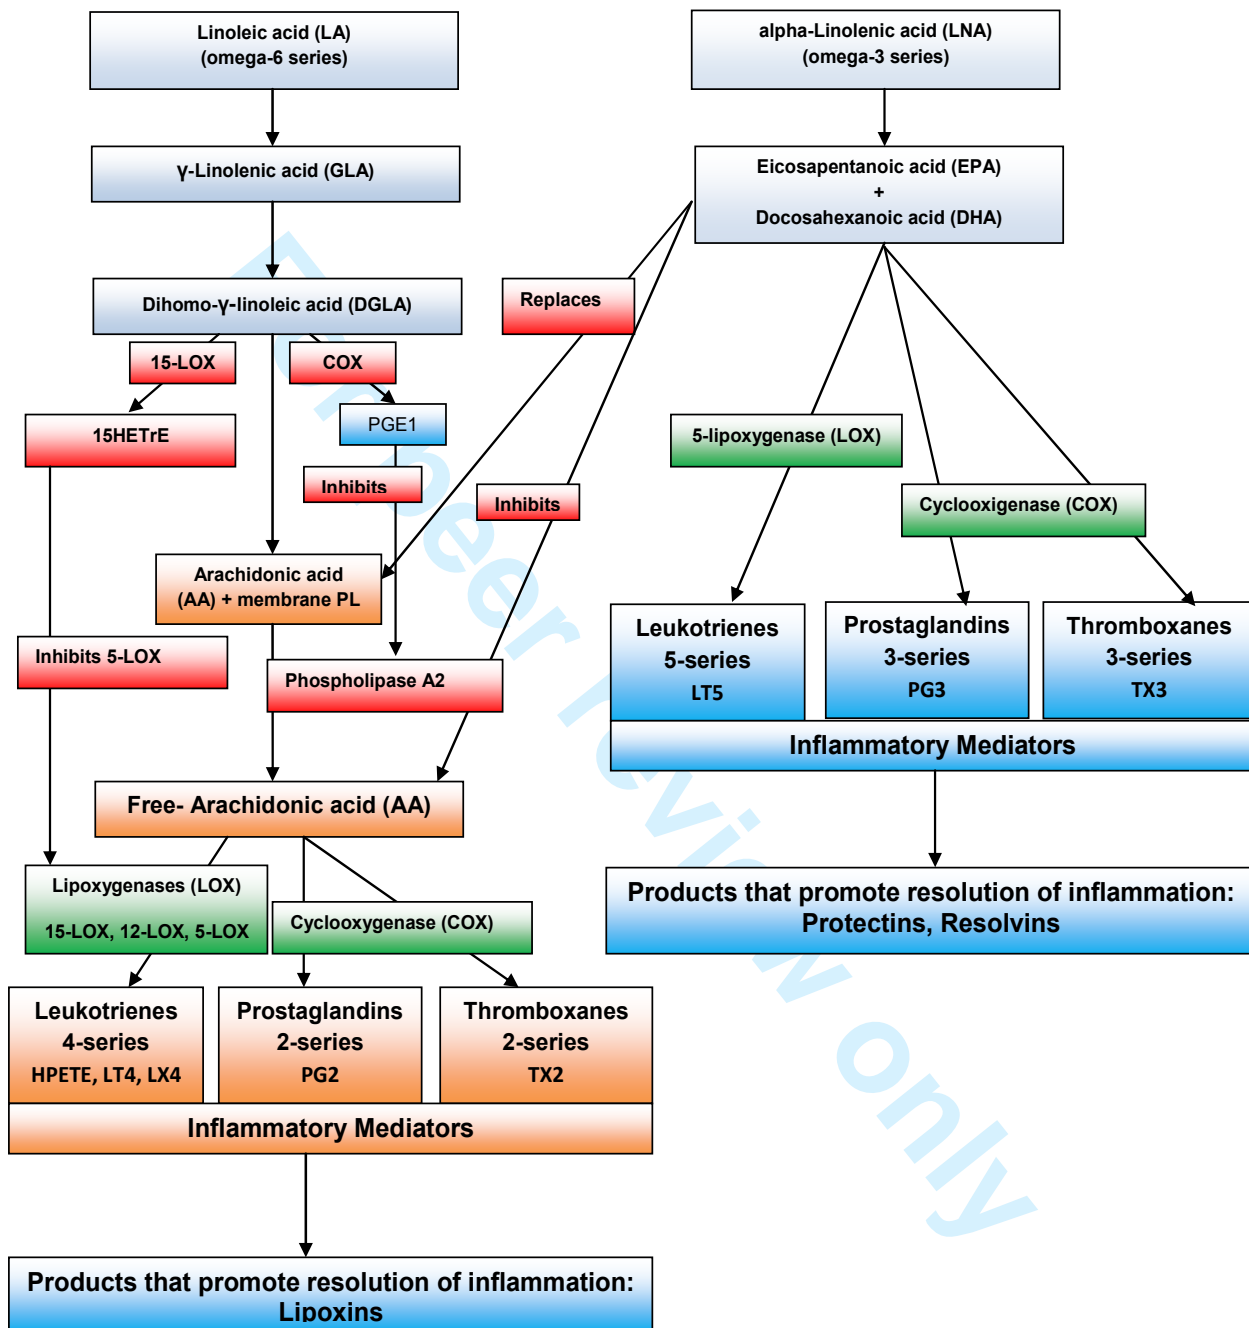

**Possible effects on inflammation:**  
 Reduce IFN-γ production; Reduce IL-2 production; Increase TGFβ activity; Increase PGE2 activity; Inhibit arachidonic acid; Reduce TNF levels; RXR-γ and PPARγ agonist; NFκB expression; stimulate Nrf2; reduce MMP-2, -3, -9, and -13

1  
2  
3  
4  
5  
6  
7  
8  
9  
10  
11  
12  
13  
14  
15  
16  
17  
18  
19  
20  
21  
22  
23  
24  
25  
26  
27  
28  
29  
30  
31  
32  
33  
34  
35  
36  
37  
38  
39  
40  
41  
42  
43  
44  
45  
46  
47  
48  
49  
50  
51  
52  
53  
54  
55  
56  
57  
58  
59  
60

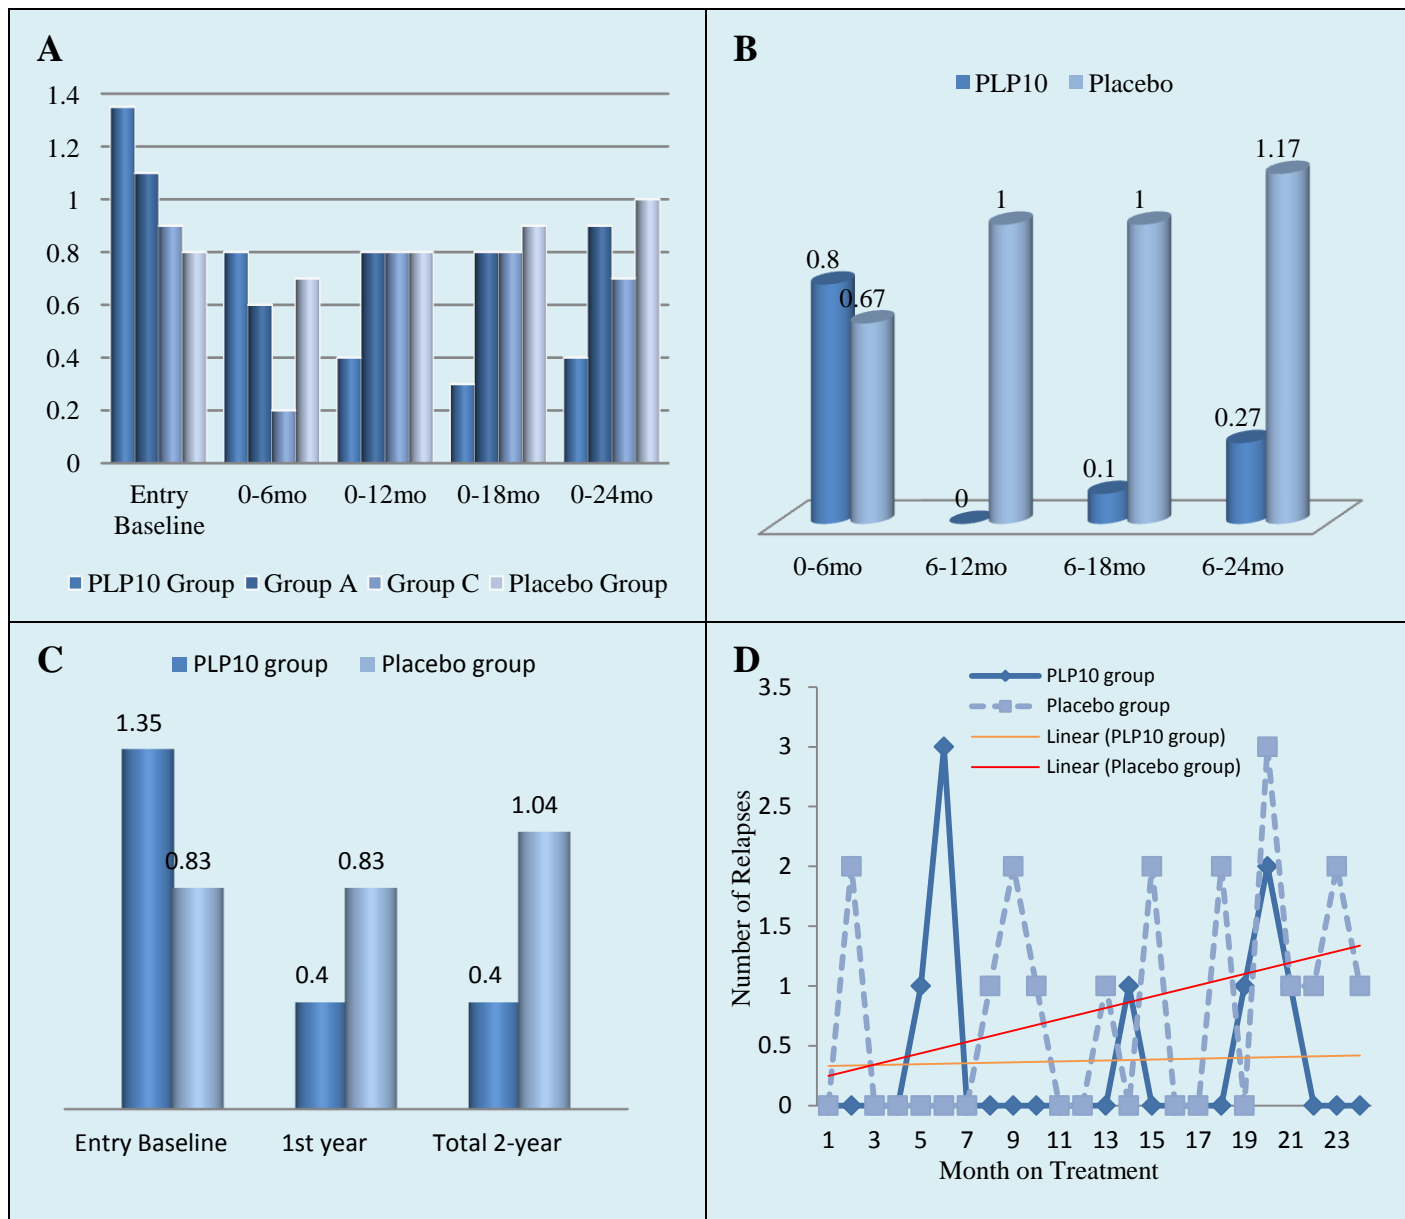

Only

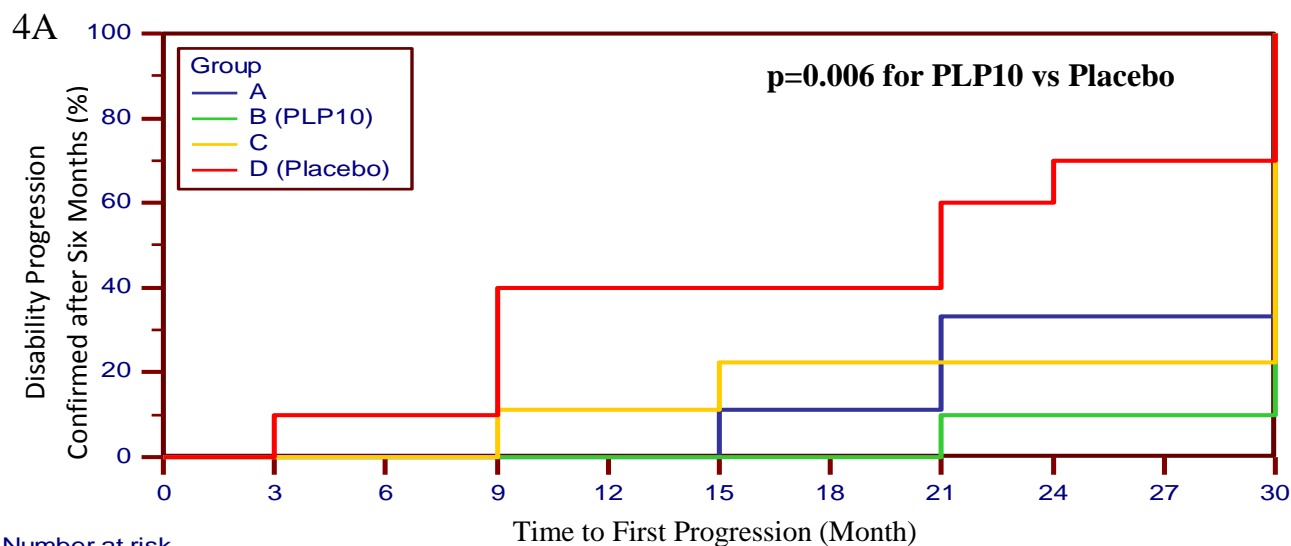

Number at risk

| Group              | 0  | 3  | 6  | 9  | 12 | 15 | 18 | 21 | 24 | 27 | 30 |
|--------------------|----|----|----|----|----|----|----|----|----|----|----|
| Group: A           | 9  | 9  | 9  | 9  | 9  | 8  | 8  | 6  | 6  | 6  | 6  |
| Group: B (PLP10)   | 10 | 10 | 10 | 10 | 10 | 10 | 10 | 9  | 9  | 9  | 9  |
| Group: C           | 9  | 9  | 9  | 8  | 8  | 7  | 7  | 7  | 7  | 7  | 7  |
| Group: D (Placebo) | 10 | 9  | 9  | 6  | 6  | 6  | 6  | 4  | 3  | 3  | 3  |

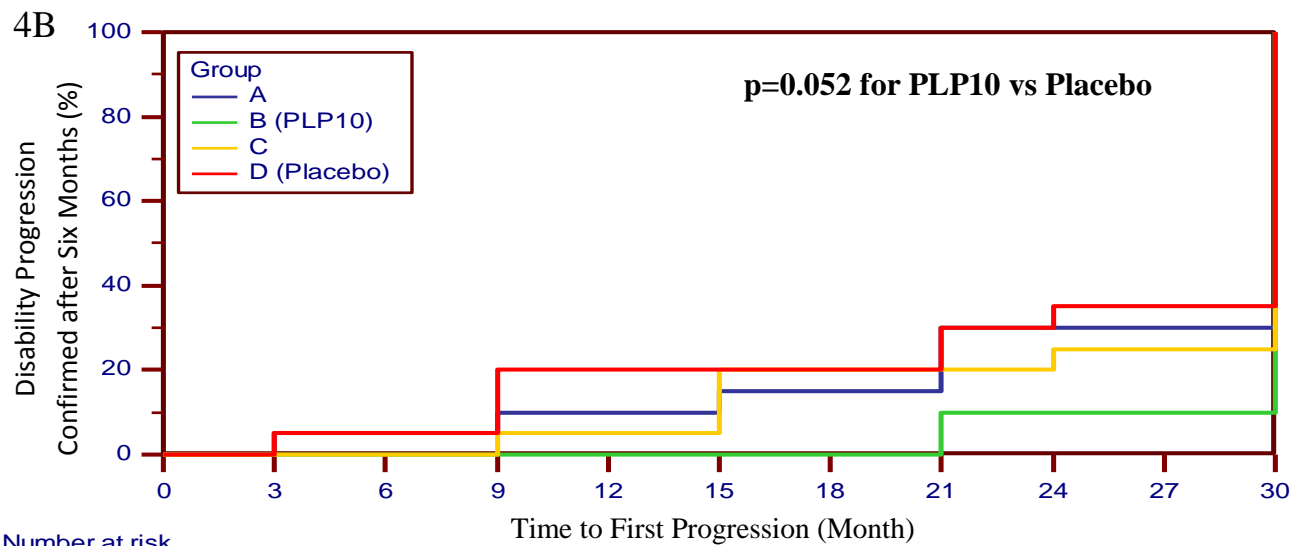

Number at risk

| Group              | 0  | 3  | 6  | 9  | 12 | 15 | 18 | 21 | 24 | 27 | 30 |
|--------------------|----|----|----|----|----|----|----|----|----|----|----|
| Group: A           | 20 | 19 | 19 | 18 | 18 | 17 | 17 | 14 | 14 | 14 | 14 |
| Group: B (PLP10)   | 20 | 20 | 20 | 20 | 20 | 20 | 20 | 18 | 18 | 18 | 18 |
| Group: C           | 20 | 20 | 20 | 19 | 19 | 16 | 16 | 16 | 15 | 15 | 15 |
| Group: D (Placebo) | 20 | 19 | 19 | 16 | 16 | 16 | 16 | 14 | 13 | 13 | 13 |

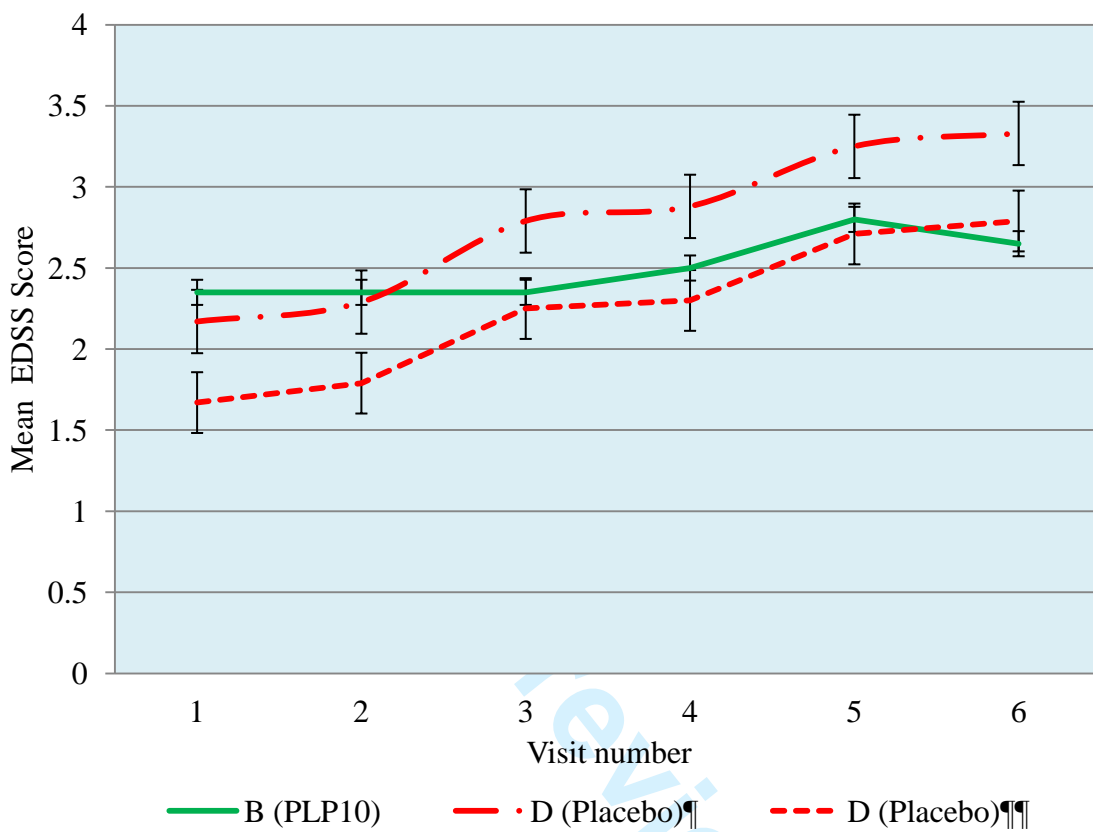

1  
2  
3 **1 Supplementary Information**  
4

5 **2 Table of Content**  
6  
7 **3**

| <b>Supplementary Section</b>        | <b>Page</b> |
|-------------------------------------|-------------|
| Supplementary Information Methods 1 | <b>2-4</b>  |
| Supplementary Information Methods 2 | <b>5-6</b>  |
| Supplementary Information Figure 1  | <b>7</b>    |
| Supplementary Information Figure 2  | <b>8</b>    |

21 4

22 5

23 6

24 7

25 8

26 9

27 10

28 11

29 12

30 13

31 14

32 15

33 16

34 17

35 18

36 19

37 20

38 21

39 22

40 23

41 24

42 25

43 26

44 27

45 28

46 29

47 30

48 31

49 32

50 33

51

52

53

54

55

56

57

58

59

60

### 34 **Supplementary Information Methods 1**

35 **Intervention and study rational.** We are using high dosage of 1:1 omega-3:omega-6  
36 polyunsaturated (PUFA) aiming to overpass and normalize global diet regional traditions and  
37 habits in relation to abnormal PUFA/saturated fatty acids (SFA)/monounsaturated fatty acids  
38 (MUFA) daily ratio consumption irrespective of the quantities consumed; and enough to  
39 equilibrate patients' diet in line with the recommended more physiologic omega-3:omega-6  
40 ratio of about 1:1-4 wt/wt as reported by Simopoulos, 2002. In addition to correct existing  
41 deficiencies, cell membrane abnormalities, specifically of the immunopathological system  
42 and blood mononuclear peripheral cells, and high enough for availability and immediate  
43 ongoing modulation of the involved pathogenic mechanisms and network of events in MS.  
44 The high dosage is also required to overpass the quantity limitations, previously discussed, of  
45 diet-consumed PUFAs for cellular incorporation, especially in the central nervous system  
46 (CNS) of adults. Additionally, fatty acids (FAs) must first cross the intestinal epithelium  
47 before reaching the different tissues, where digestion and absorption constitute further  
48 problems in their availability (Carlier, H, 1991). Omega-3 PUFA are used in re-esterified  
49 form to eliminate unwanted disturbances, at the sides of action, by other fatty acids and  
50 molecules present in crude fish oils but also to increase the bioavailability of the FA since  
51 triglycerides have been shown to be associated with much higher bioavailability (Dyerberg et  
52 al, 2010). Linoleic (LA) and gamma linolenic acid (GLA) are essential structure molecules  
53 and important for any physiological (re)generation of cell membrane. GLA quantity is  
54 doubled to LA to ensure high direct production of dihomo-gamma-linolenic acid (DGLA),  
55 from GLA when LA cannot be metabolized, due to desaturase deficiency or malfunction.  
56 Such a reduced capacity to convert LA to GLA has been associated with aging, diabetes,  
57 alcoholism, atopic dermatitis, premenstrual syndrome, rheumatoid arthritis, cancer and  
58 cardiovascular diseases (Bolton-Smith et al, 1997; Horrobin, 1990; Leventhal et al, 1993).  
59 This is going to result in the increase of DGLA relative to arachidonic acid (AA) with DGLA  
60 promoting production of prostaglandin (PG)E1 but also inhibition of phospholipase (PL)A2:  
61 two major reasons and rational for their use. If other metabolic problems are involved within  
62 the omega-6 series and the normal metabolites are not produced then the eicosapentaenoic  
63 acid EPA available in PLP10 will substitute the function of DGLA, as a competitive inhibitor  
64 of AA for PLA2. In both cases the pro-inflammatory leucotrienes, prostaglandines of the 2-  
65 series (PG2) and thromboxanes of the 2 series including the platelet-activator factor (PAF)  
66 will be attenuated. The synthesis of AA from DGLA by  $\Delta 5$  desaturase promoted by LA/GLA  
67 supplementation is very limited in humans as a result of limited activity of the enzyme  
68 (Yang-Yi & Robert, 1998). AA in the body is mostly available through diet. EPA and  
69 docosahexaenoic acid (DHA) are both physiologically important and crucial structured  
70 molecules able to substitute excess AA and SFA within the cell membranes. EPA will  
71 contribute to the inhibition (competitive to AA) of PLA2, joining the co-supplied omega-6  
72 PUFA but will also participate in the production of anti-inflammatory leukotrienes,  
73 prostaglandins of the 3-series (PG3) and thromboxane (TX3) along with DHA, both found in  
74 the PLP10 intervention. Moreover EPA will replace AA of the membrane phospholipids and  
75 both omega-3 PUFA will contribute replacing abnormal quantities of SFA and excess AA.  
76 DHA is used in 3:1 ratio to EPA to cover any possible inabilities of EPA to be metabolized,  
77 high enough to strongly promote high production of the aforementioned anti-inflammatory

1  
2  
3 78 eicosanoids and cytokines and to be incorporated into CNS cell membranes where DHA  
4 79 should be the major PUFA present, replacing other FA, probably saturated and excess of AA.  
5 80 EPA, DHA, LA and GLA along with the rest of the other ingredients used (“other” omega-3  
6 81 PUFA, SFA and MUFA that are usually found in the cell membranes of healthy people in  
7 82 limited quantities) in the intervention regimen are for their availability as minor structural  
8 83 constituents of physiological cellular membranes integrity, fluidity and overall function as  
9 84 building blocks for myelin repair and/or myelination. Furthermore the PUFA used within the  
10 85 cocktail intervention aimed to manipulate all other pathophysiological pathways that are  
11 86 reported to be able to: as previously discussed including gene transcription for  
12 87 neuroprotection and remyelination. Furthermore, PUFA are used to ensure the integrity of  
13 88 blood brain barrier (BBB) and to modulate the gelatinases responsible for the T cell migration  
14 89 within the CNS. Three different antioxidant vitamins (vitamin E, mostly as alpha-tocopherol,  
15 90 gamma ( $\gamma$ )-tocopherol (vitamin E isoform) and vitamin A) are used in the regimen  
16 91 preparation to support the cellular antioxidant defenses but also to protect peroxidation of the  
17 92 supplied increased amounts of PUFA. Alpha-tocopherol low-molecular-weight antioxidants  
18 93 will contribute to radical scavenging, interfering with gene transcription, protein expression,  
19 94 enzyme activity and metal chelation (van Meeteren et al, 2005). Vitamin E (alpha tocopherol)  
20 95 and vitamin A are used as antioxidants for the protection of the excess supplemented PUFA,  
21 96 with alpha-tocopherol been demonstrated to protect against peroxynitrite-induced oxidative  
22 97 damage, as well as able to efficiently detoxify hydroxyl, perhydroxyl and superoxide free  
23 98 radicals (the elevated reactive oxygen species (ROS)); each one with different mechanism of  
24 99 action, increasing the effect capability (Vatassery et al, 1998b; van Meeteren, 2005). Gamma-  
25 100 tocopherol is used in high dosage since its half life is very short compared to alpha-  
26 101 tocopherol and has been demonstrated to specifically protect against nitro-radicals.  
27 102 Tocopherols can also exert non-antioxidant properties, including modulation of cell signaling  
28 103 and immune function, regulation of transcription, and induction of apoptosis as previously  
29 104 discussed (van Meeteren et al, 2005).

30  
31  
32  
33  
34  
35  
36  
37  
38  
39 105 PLP10 is the first preparation ever developed for MS therapy that is composed by the use of  
40 106 all different previously discussed PUFA, MUFA, SFA in a cocktail preparation mixed with  
41 107 the specific aforementioned antioxidant vitamins that have never been all together used  
42 108 before within a specific formulation. The ingredients ratio, quality, structural form and  
43 109 mostly the high dosage has never been before tested. Furthermore, the knowledge and  
44 110 chronotherapy as well as other unique limitations associated with the individual molecules  
45 111 used, have never been accounted, discussed, proposed or reported for any previous  
46 112 therapeutic regimen.

47  
48  
49  
50 113 Through systems medicine therapeutic philosophy, by the use of PLP10, potentially MS  
51 114 patients have the opportunity to be treated holistically, by natural source isolated molecules,  
52 115 demonstrated as able of affecting and modulating all known pathophysiological,  
53 116 immunopathological, habitual, gene related factors; thus the dynamic interconnected complex  
54 117 network of events simultaneously. Possibly synergistic effects between PLP10 ingredients are  
55 118 also feasible. Moreover we can speculate that treatment efficacy of PLP10, when used as



- 1  
2  
3 119 adjunct to existing pharmaceuticals produced by reductionism, can be proven therapeutically  
4 120 superior to any available treatment for MS.  
5  
6 121  
7  
8 122 Bolton-Smith C, Woodward M, Tavendale R (1997) Evidence for age-related differences in  
9 123 the fatty acid composition of human adipose tissue, independent of diet. *European Journal of*  
10 124 *Clinical Nutrition* **51**: 619-624  
11  
12 125  
13 126 Carlier H, Bernard A, Caselli C (1991) Digestion and absorption of polyunsaturated fatty  
14 127 acids. *Reproduction, nutrition, development* **31**: 475-500  
15  
16 128  
17 129 Dyerberg J, Madsen P, Møller JM, Aardestrup I, Schmidt EB (2010) Bioavailability of  
18 130 marine n-3 fatty acid formulations. *Prostaglandins, leukotrienes, and essential fatty acids* **83**:  
19 131 137-141  
20  
21 132  
22 133 Horrobin DF (1990) Gamma-linolenic acid. *Rev Contemp Physiol* **1**: 1-41  
23  
24 134  
25 135 Leventhal LJ, Boyce EG, Zurier RB (1993) Treatment of rheumatoid arthritis with  
26 136 gammalinolenic acid. *Annals of Internal Medicine* **119**: 867-873  
27  
28 137  
29 138 Simopoulos AP (2002) The importance of the ratio of omega-6/omega-3 essential fatty acids.  
30 139 *Biomedicine & Pharmacotherapy* **56**: 365-379  
31  
32 140  
33 141 van Meeteren ME, Teunissen CE, Dijkstra CD, van Tol EAF (2005) Antioxidants and  
34 142 polyunsaturated fatty acids in multiple sclerosis. *Eur J Clin Nutr* **59**: 1347-1361  
35  
36 143  
37 144 Yang-Yi F, Robert SC (1998) Importance of Dietary g-Linolenic acid in human health and  
38 145 nutrition. *The Journal of Nutrition* **128**: 1411-1414  
39  
40 146  
41 147 Vatassery GT, Smith WE, Quach HT (1998b) Alpha-tocopherol in rat brain subcellular  
42 148 fractions is oxidized rapidly during incubations with low concentrations of peroxynitrite.  
43 149 *Journal of Nutrition* **128**:152–157.  
44  
45 150  
46 151  
47 152  
48 153  
49 154  
50 155  
51 156  
52 157  
53 158  
54 159  
55  
56  
57  
58  
59  
60

## 160 **Supplementary Information Methods 2**

161 **Interventions specifications.** The specific omega-3 (re-esterified glycerides) and omega-6  
162 (glycerides) raw materials were purchased according to the required interventions' PUFA-  
163 fraction specification (molecular structure, quantity/ratio and quality) with vitamin E (alpha-  
164 tocopherol) used as antioxidant stabilizer by the supplier. The vitamins and masking aroma  
165 were purchased separately. The mixing of fractions to the final required intervention-  
166 composition specification was always performed by the same team of scientists under the  
167 supervision of the involved medical biochemist and lipidology specialist, under appropriate  
168 conditions every six months. Interventions were stored refrigerated in dark until use.

169  
170 The ratios of the different ingredients used were as follows: omega-3, EPA to DHA (about 1  
171 to 3 wt/wt), omega-6, LA to GLA (about 2 to 1 wt/wt), omega-3 (EPA + DHA) to omega-6  
172 (LA + GLA) (about 1 to 1 wt/wt). The total omega-3 (EPA + DHA + "other" omega-3  
173 PUFA) used as re-esterified triglycerol (minimum value 60%), diglyceride (about 33%),  
174 monoglyceride (about 2%) structural form mixture and about 2% ethyl ester structural form,  
175 with no less than 80% re-esterified triglycerol content to be DHA and EPA as a result of  
176 PUFA triglycerides re-esterification of fish body oils. The "other" group of omega-3 on the  
177 re-esterified glycerols included the 18:3 (alpha-linolenic acid), 18:4 (stearidonic acid), 20:4  
178 (eicosatetraenoic acid) and 22:5 (docosapentaenoic acid) PUFA. The fraction of omega-6  
179 (LA + GLA) used as triglycerides with no less than 50-65% triglycerol content to be LA and  
180 GLA in a ratio of 2 to 1 with 18:1 (oleic acid) 14-20% and 20:1 (eicosenoic acid), 22:1  
181 (docosenoic acid), 24:1 (tetracosenic acid) as additional monounsaturated fatty acids and  
182 minor quantities of 16:0 (palmitic acid) 4-16%, 18:0 (stearic acid) 2-5% saturated fatty acids  
183 from Borage oil source. The vitamins used were vitamin A as beta-carotene, vitamin E  
184 (alpha-tocopherol) and pure gamma-tocopherol (vitamine E isoform). Citrus extract was used  
185 as masking aroma and pure virgin olive oil as delivery vehicle.

186  
187 **The daily intervention formula agent dosages were:**

188 **Intervention formula A** daily dosage: EPA (1650mg) / DHA (4650mg) / GLA (2000mg) /  
189 LA (3850mg) / total other omega-3 (600mg) / total monounsaturated fatty acids (MUFA)  
190 (18:1 1300mg, 20:1 250mg, 22:1 82mg, 24:1 82mg) + total saturated fatty acids (SFA) (18:0  
191 160mg, 16:0 650mg) / vitamin A (0.6mg) / vitamin E (22mg).

192 **Intervention formula B (PLP10)** daily dosage: EPA (1650mg) / DHA (4650mg) / GLA  
193 (2000mg) / LA (3850mg) / total other omega-3 (600mg) / total MUFA (18:1 1300mg, 20:1  
194 250mg, 22:1 82mg, 24:1 82mg) + total SFA (18:0 160mg, 16:0 650mg) / vitamin A (0.6mg) /  
195 vitamin E (22mg) / gamma- tocopherol ( $\gamma$ -tocopherol) (760 mg).

196 **Intervention formula C** daily dosage:  $\gamma$ -tocopherol (760 mg) (in 16137 mg pure virgin olive  
197 oil as a vehicle).

198 **Intervention formula D** daily dosage: pure virgin olive oil (16930mg).

199 Citrus aroma was added in each intervention formula to make up a total dosage of 19.5ml of  
200 solution per day.

1  
2  
3 201 The specific omega-3 related fraction, according to specifications required for the  
4 202 interventions was prepared and purchased from EPAX AS, Aalesund, Norway; as re-  
5 203 esterified glycerides from fish body oils as a source. The specific omega-6 PUFA, MUFA  
6 204 and SFA related fraction, according to required specifications, was prepared and purchased  
7 205 from Goerlich Pharma International GmbH, Edling, Germany, as triglycerides from Borage  
8 206 seed oil (organic, cold pressed) "*Borago officinalis*" as a source. Both omega-3 and omega-6  
9 207 fractions were delivered stabilized by the producer (vitamine E (alpha-tocopherol) ~ 4.5 mg/g  
10 208 was used as antioxidant).

11  
12  
13  
14 209 Vitamins: vitamin A as beta-carotene (HealthAid Ltd., Middlesex, United Kingdom) and pure  
15 210 gamma-tocopherol (Tama Biochemical Co. Ltd., Shinjuku-ku Tokyo, Japan).

16  
17  
18 211 Citrus aroma (Givaudan Schwaiz AG, Dubendorf, Switzerland).

19  
20  
21 212

22  
23  
24 213

25  
26  
27 214

28  
29  
30  
31 215

32  
33  
34 216

35  
36  
37 217

38  
39  
40  
41 218

42  
43  
44 219

45  
46  
47 220

48  
49  
50  
51 221

52  
53  
54 222

55  
56  
57  
58 223  
59  
60



**Supplementary Information Figure 1 | Population on DMT and/or natalizumab.** (a) Demonstrates the all-time on-study population per treatment arm that was receiving or not receiving DMT at entry baseline and the same population at the end of the trial (including patients on natalizumab). No statistical significant differences were calculated. The all-time on-study patients per treatment-arm that were receiving DMT at entry baseline were six patients out of ten (60%) within group A, four out of ten (40%) within PLP10 group, six out of nine (66%) within group C and six out of 12 (50%) within placebo. When the study completed, 80% of the patients in group A, 60% in PLP10 group, 66% in group C and 75% of the patients in placebo ended up on treatment. Within group A one out of eight and within placebo two out of nine patients on DMT transferred on natalizumab. (b) Demonstrates the total randomized population per treatment arm that was receiving or not receiving DMT at entry baseline and the same population at the end of the trial without lost to follow (including patients on natalizumab). A total of 61% of group A patients were on DMT at entry baseline and became 72% at the end; for PLP10 group 41% and became 53%; for group C 73% and became 74% and for placebo 53% and became 74% at study completion. At the end: for group A, four out of 13 patients on DMT transferred on natalizumab; for PLP10 group no patient was on natalizumab; for Group C two out of 14 patients on DMT transferred on natalizumab; and for placebo group four out of the 14 patients on DMT transferred on natalizumab. No significant differences measured at entry baseline between the groups.

224

225

226

227

1  
2  
3  
4  
5  
6  
7  
8  
9  
10  
11  
12  
13  
14  
15  
16  
17  
18  
19  
20  
21  
22  
23  
24  
25  
26  
27  
28  
29  
30  
31  
32  
33  
34  
35  
36  
37  
38  
39  
40  
41  
42  
43  
44  
45  
46  
47  
48  
49  
50  
51  
52  
53  
54  
55  
56  
57  
58  
59  
60



228

229

### Checklist of Items for Reporting Trials of Nonpharmacologic Treatments\*

| Section                    | Item | Standard CONSORT Description                                                                                                                                                              | Extension for Nonpharmacologic Trials                                                                                                                                       | Reported on Page No.                   |
|----------------------------|------|-------------------------------------------------------------------------------------------------------------------------------------------------------------------------------------------|-----------------------------------------------------------------------------------------------------------------------------------------------------------------------------|----------------------------------------|
| <b>Title and abstract†</b> | 1    | How participants were allocated to interventions (e.g., “random allocation,” “randomized,” or “randomly assigned”)                                                                        | In the abstract, description of the experimental treatment, comparator, care providers, centers, and blinding status                                                        | 1,3,4                                  |
| <b>Introduction</b>        |      |                                                                                                                                                                                           |                                                                                                                                                                             |                                        |
| Background                 | 2    | Scientific background and explanation of rationale                                                                                                                                        |                                                                                                                                                                             | 5 to 8                                 |
| <b>Methods</b>             |      |                                                                                                                                                                                           |                                                                                                                                                                             |                                        |
| Participants†              | 3    | Eligibility criteria for participants and the settings and locations where the data were collected                                                                                        | When applicable, eligibility criteria for centers and those performing the interventions                                                                                    | 8, 13,15                               |
| Interventions†             | 4    | Precise details of the interventions intended for each group and how and when they were actually administered                                                                             | Precise details of both the experimental treatment and comparator                                                                                                           | 9,10,11, Table 1 p.28, Appendix p. 5,6 |
|                            | 4A   |                                                                                                                                                                                           | Description of the different components of the interventions and, when applicable, descriptions of the procedure for tailoring the interventions to individual participants | 10, Table 1 p.28, Appendix p.5         |
|                            | 4B   |                                                                                                                                                                                           | Details of how the interventions were standardized                                                                                                                          | 9,10, Table 1 p.28, Appendix p.5       |
|                            | 4C   |                                                                                                                                                                                           | Details of how adherence of care providers with the protocol was assessed or enhanced                                                                                       | 9                                      |
| Objectives                 | 5    | Specific objectives and hypotheses                                                                                                                                                        |                                                                                                                                                                             | 7,8                                    |
| Outcomes                   | 6    | Clearly defined primary and secondary outcome measures and, when applicable, any methods used to enhance the quality of measurements (e.g., multiple observations, training of assessors) |                                                                                                                                                                             | 12                                     |
| Sample size†               | 7    | How sample size was determined and, when applicable, explanation of any interim analyses and stopping rules                                                                               | When applicable, details of whether and how the clustering by care providers or centers was addressed                                                                       | 14                                     |

|    |                                        |             |                                                                                                                                                                                                                                                                                                                                                             |                                                                                                                                                                       |
|----|----------------------------------------|-------------|-------------------------------------------------------------------------------------------------------------------------------------------------------------------------------------------------------------------------------------------------------------------------------------------------------------------------------------------------------------|-----------------------------------------------------------------------------------------------------------------------------------------------------------------------|
| 1  |                                        |             |                                                                                                                                                                                                                                                                                                                                                             |                                                                                                                                                                       |
| 2  |                                        |             |                                                                                                                                                                                                                                                                                                                                                             |                                                                                                                                                                       |
| 3  |                                        |             |                                                                                                                                                                                                                                                                                                                                                             |                                                                                                                                                                       |
| 4  |                                        |             |                                                                                                                                                                                                                                                                                                                                                             |                                                                                                                                                                       |
| 5  | Randomization–<br>sequence generation† | 8           | Method used to generate the random allocation<br>sequence, including details of any restriction<br>(e.g., blocking, stratification)                                                                                                                                                                                                                         | When applicable, how care providers were<br>allocated to each trial group                                                                                             |
| 6  |                                        |             |                                                                                                                                                                                                                                                                                                                                                             | 9                                                                                                                                                                     |
| 7  |                                        |             |                                                                                                                                                                                                                                                                                                                                                             |                                                                                                                                                                       |
| 8  | Allocation concealment                 | 9           | Method used to implement the random<br>allocation sequence (e.g., numbered containers<br>or central telephone), clarifying whether the<br>sequence was concealed until interventions<br>were assigned                                                                                                                                                       | 9                                                                                                                                                                     |
| 9  |                                        |             |                                                                                                                                                                                                                                                                                                                                                             |                                                                                                                                                                       |
| 10 |                                        |             |                                                                                                                                                                                                                                                                                                                                                             |                                                                                                                                                                       |
| 11 |                                        |             |                                                                                                                                                                                                                                                                                                                                                             |                                                                                                                                                                       |
| 12 | Implementation                         | 10          | Who generated the allocation sequence, who<br>enrolled participants, and who assigned<br>participants to their groups                                                                                                                                                                                                                                       | 9                                                                                                                                                                     |
| 13 |                                        |             |                                                                                                                                                                                                                                                                                                                                                             |                                                                                                                                                                       |
| 14 |                                        |             |                                                                                                                                                                                                                                                                                                                                                             |                                                                                                                                                                       |
| 15 | Blinding (masking)†                    | 11A         | Whether or not participants, those<br>administering the interventions, and those<br>assessing the outcomes were blinded to group<br>assignment                                                                                                                                                                                                              | Whether or not those administering co-<br>interventions were blinded to group assignment                                                                              |
| 16 |                                        |             |                                                                                                                                                                                                                                                                                                                                                             | 9,10                                                                                                                                                                  |
| 17 |                                        |             |                                                                                                                                                                                                                                                                                                                                                             |                                                                                                                                                                       |
| 18 |                                        |             |                                                                                                                                                                                                                                                                                                                                                             |                                                                                                                                                                       |
| 19 |                                        |             |                                                                                                                                                                                                                                                                                                                                                             |                                                                                                                                                                       |
| 20 |                                        | 11B         |                                                                                                                                                                                                                                                                                                                                                             | If blinded, method of blinding and description of<br>the similarity of interventions†                                                                                 |
| 21 |                                        |             |                                                                                                                                                                                                                                                                                                                                                             | 9,10,Appendix p.5                                                                                                                                                     |
| 22 | Statistical methods†                   | 12          | Statistical methods used to compare groups for<br>primary outcome(s); methods for additional<br>analyses, such as subgroup analyses and<br>adjusted analyses                                                                                                                                                                                                | When applicable, details of whether and how the<br>clustering by care providers or centers was<br>addressed                                                           |
| 23 |                                        |             |                                                                                                                                                                                                                                                                                                                                                             | 13, 14, 15                                                                                                                                                            |
| 24 |                                        |             |                                                                                                                                                                                                                                                                                                                                                             |                                                                                                                                                                       |
| 25 |                                        |             |                                                                                                                                                                                                                                                                                                                                                             |                                                                                                                                                                       |
| 26 | <b>Results</b>                         |             |                                                                                                                                                                                                                                                                                                                                                             |                                                                                                                                                                       |
| 27 | Participant flow†                      | 13          | Flow of participants through each stage (a<br>diagram is strongly recommended)---<br>specifically, for each group, report the numbers<br>of participants randomly assigned, receiving<br>intended treatment, completing the study<br>protocol, and analyzed for the primary<br>outcome; describe deviations from study as<br>planned, together with reasons | The number of care providers or centers<br>performing the intervention in each group and<br>the number of patients treated by each care<br>provider or in each center |
| 28 |                                        |             |                                                                                                                                                                                                                                                                                                                                                             | 15 <b>Fig 2</b>                                                                                                                                                       |
| 29 |                                        |             |                                                                                                                                                                                                                                                                                                                                                             |                                                                                                                                                                       |
| 30 |                                        |             |                                                                                                                                                                                                                                                                                                                                                             |                                                                                                                                                                       |
| 31 |                                        |             |                                                                                                                                                                                                                                                                                                                                                             |                                                                                                                                                                       |
| 32 |                                        |             |                                                                                                                                                                                                                                                                                                                                                             |                                                                                                                                                                       |
| 33 |                                        |             |                                                                                                                                                                                                                                                                                                                                                             |                                                                                                                                                                       |
| 34 |                                        |             |                                                                                                                                                                                                                                                                                                                                                             |                                                                                                                                                                       |
| 35 | Implementation of<br>intervention†     | New<br>item |                                                                                                                                                                                                                                                                                                                                                             | Details of the experimental treatment and<br>comparator as they were implemented                                                                                      |
| 36 |                                        |             |                                                                                                                                                                                                                                                                                                                                                             | 10,15,16 Appendix<br>p..5,                                                                                                                                            |
| 37 | Recruitment                            | 14          | Dates defining the periods of recruitment and<br>follow-up                                                                                                                                                                                                                                                                                                  | 11,15                                                                                                                                                                 |
| 38 |                                        |             |                                                                                                                                                                                                                                                                                                                                                             |                                                                                                                                                                       |
| 39 | Baseline data†                         | 15          | Baseline demographic and clinical<br>characteristics of each group                                                                                                                                                                                                                                                                                          | When applicable, a description of care providers<br>(case volume, qualification, expertise, etc.) and<br>centers (volume) in each group                               |
| 40 |                                        |             |                                                                                                                                                                                                                                                                                                                                                             | 16,Table 2                                                                                                                                                            |
| 41 |                                        |             |                                                                                                                                                                                                                                                                                                                                                             |                                                                                                                                                                       |
| 42 |                                        |             |                                                                                                                                                                                                                                                                                                                                                             |                                                                                                                                                                       |
| 43 |                                        |             |                                                                                                                                                                                                                                                                                                                                                             |                                                                                                                                                                       |
| 44 |                                        |             |                                                                                                                                                                                                                                                                                                                                                             |                                                                                                                                                                       |
| 45 |                                        |             |                                                                                                                                                                                                                                                                                                                                                             |                                                                                                                                                                       |
| 46 |                                        |             |                                                                                                                                                                                                                                                                                                                                                             |                                                                                                                                                                       |
| 47 |                                        |             |                                                                                                                                                                                                                                                                                                                                                             |                                                                                                                                                                       |
| 48 |                                        |             |                                                                                                                                                                                                                                                                                                                                                             |                                                                                                                                                                       |
| 49 |                                        |             |                                                                                                                                                                                                                                                                                                                                                             |                                                                                                                                                                       |

|                         |    |                                                                                                                                                                                                           |                                                                                                                                                                       |          |
|-------------------------|----|-----------------------------------------------------------------------------------------------------------------------------------------------------------------------------------------------------------|-----------------------------------------------------------------------------------------------------------------------------------------------------------------------|----------|
| Numbers analyzed        | 16 | Number of participants (denominator) in each group included in each analysis and whether analysis was by “intention-to-treat”; state the results in absolute numbers when feasible (e.g., 10/20, not 50%) |                                                                                                                                                                       | 15,16    |
| Outcomes and estimation | 17 | For each primary and secondary outcome, a summary of results for each group and the estimated effect size and its precision (e.g., 95% confidence interval)                                               |                                                                                                                                                                       | 15 to 20 |
| Ancillary analyses      | 18 | Address multiplicity by reporting any other analyses performed, including subgroup analyses and adjusted analyses, indicating those prespecified and those exploratory                                    |                                                                                                                                                                       | 20       |
| Adverse events          | 19 | All important adverse events or side effects in each intervention group                                                                                                                                   |                                                                                                                                                                       | 20       |
| <b>Discussion</b>       |    |                                                                                                                                                                                                           |                                                                                                                                                                       |          |
| Interpretation†         | 20 | Interpretation of the results, taking into account study hypotheses, sources of potential bias or imprecision, and the dangers associated with multiplicity of analyses and outcomes                      | In addition, take into account the choice of the comparator, lack of or partial blinding, and unequal expertise of care providers or centers in each group            | 21       |
| Generalizability†       | 21 | Generalizability (external validity) of the trial findings                                                                                                                                                | Generalizability (external validity) of the trial findings according to the intervention, comparators, patients, and care providers and centers involved in the trial | 22       |
| Overall evidence        | 22 | General interpretation of the results in the context of current evidence                                                                                                                                  |                                                                                                                                                                       | 22 to 26 |

\*Additions or modifications to the CONSORT checklist. CONSORT = Consolidated Standards of Reporting Trials.

†This item was modified in the 2007 revised version of the CONSORT checklist.
